# Supplementary material
Source: MDPI journal article supplement (https://www.mdpi.com/1999-4907/14/1/4)
Supplement: s1 [file s1]

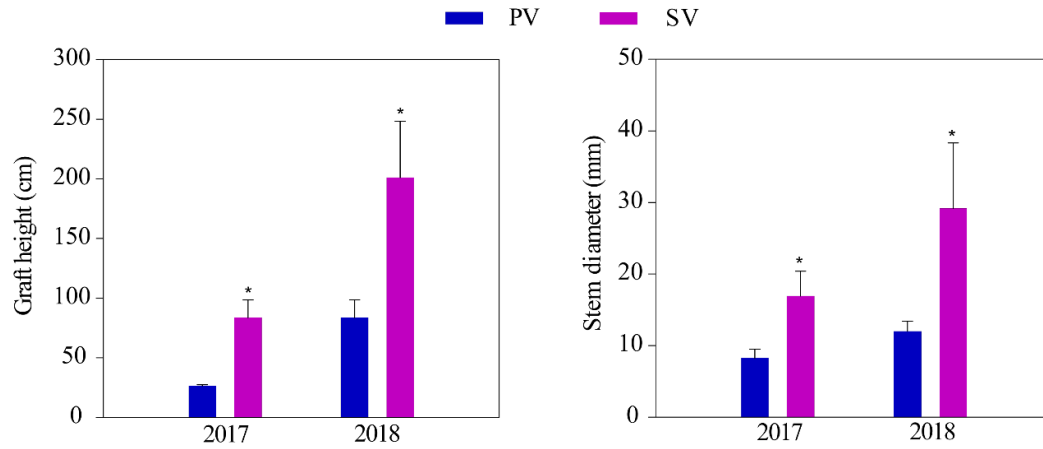

**Figure S1.** Two groups (PV and SV; three grafts per group) of seedlings grafted on short and tall rootstocks (SR and TR) exhibited significantly different growth vigor in two growth seasons (2017 and 2018). PV: grafts with poor growth vigor on SR; SV: grafts with strong growth vigor on TR. The graft height was counted from graft union to top and diameter refers to the diameter of the grafts in the position of 1 cm-height above graft union. T-test was conducted on graft height and diameter. “\*” represents the significant differences in growth indexes of each year between the two groups of grafts ( $p < 0.05$ ). Error bars represent standard deviation.
