# Supplementary material
Source: MDPI journal article supplement (https://www.mdpi.com/1999-4907/14/1/4)
Supplement: s1 [file s1]

Archive with 11 entries (11 files):
- Figure S1 Significantly different growth vigor in two groups of pecan grafts (SV and PV).pdf
- Figure S2 Characteristics of 9-base pair sequences with methylated CG, CHG and CHH (SV2, SV3, PV1, PV2 and PV3).pdf
- Figure S3 Circle plot of methylation distribution in pecan chromosomes (SV2, SV3, PV1, PV2 and PV3).pdf
- Figure S4 Methylation distribution in different gene regions (SV2, SV3, PV1, PV2 and PV3).pdf
- Figure S5 Methylation distribution in repeat regions (SV2, SV3, PV1, PV2 and PV3).pdf
- Figure S6 GO annotation of DMGs in CG and CHG contexts.pdf
- Figure S7 KEGG enrichment analysis of DMGs in CG and CHG contexts.pdf
- Table S1 Statistics of methylated cytosines.xlsx
- Table S2 DMRs and DMGs.xlsx
- Table S3 GO enrichment analysis of DMGs.xlsx
- Table S4 The DMGs in CHH context potentially related with hormone regulation.xlsx
