# Supplementary material
Source: MDPI journal article supplement (https://www.mdpi.com/1999-4907/14/1/4)
Supplement: s1 [file s1 › Table S1 Statistics of methylated cytosines.xlsx]

## Sheet: Sheet1
Table S1 Statistics of methylated cytosines in samples of pecan grafts
	Number of total CG	Number of mCG	Number of total CHG	Number of mCHG	Number of total CHH	Number of mCHH	Percentage of total mC
SV1	18107633	12167433	24073549	13296217	143432009	22052537	0.255996
SV2	16513042	11026497	22080661	11959746	131799078	18797419	0.24522
SV3	16407877	11132482	21930784	12130240	131091486	19296195	0.251189
PV1	17003564	11388735	22680418	12355078	135850588	19308620	0.245265
PV2	17103475	11436159	22833829	12438656	136663032	19577862	0.246051
PV3	16757002	11255173	22376784	12242092	133743473	19695098	0.249844
Note：	SV: grafts with strong growth vigor on tall rootstocks; PV: grafts with poor growth vigor on short rootstocks.
