# Supplementary material
Source: MDPI journal article supplement (https://www.mdpi.com/1999-4907/14/1/4)
Supplement: s1 [file s1 › Table S2 DMRs and DMGs.xlsx]

## Sheet: CG
Table S2 DMRs and DMGs in CG context
Information of DMRs								Information of DMGs
chromosome	start	end	width	meth direction	methDif	p	annotation	geneStart	geneEnd	geneLength	geneStrand	geneId
scaffold68792	61721	61823	103	strongHyper	0.411	3.88e-14	Promoter (<=1kb)	54120	61246	7127	-	CIL0893S0007
scaffold68792	94760	94845	86	strongHyper	0.402	1.31e-11	Intron (CIL0893S0013.mRNA/CIL0893S0013, intron 2 of 6)	93888	100533	6646	+	CIL0893S0013
scaffold68792	123606	123665	60	strongHyper	0.226	3.59e-06	Promoter (<=1kb)	120817	123126	2310	-	CIL0893S0016
scaffold68792	434505	434545	41	strongHyper	0.223	1.62e-13	Distal Intergenic	431928	433589	1662	+	CIL0893S0055
scaffold68792	621332	621342	11	strongHypo	-0.208	1.5e-05	Distal Intergenic	605033	606922	1890	-	CIL0893S0072
scaffold68792	638524	638578	55	strongHypo	-0.396	7.37e-34	Distal Intergenic	605033	606922	1890	-	CIL0893S0072
scaffold68792	820888	820897	10	strongHypo	-0.571	1.3e-14	Intron (CIL0893S0088.mRNA/CIL0893S0088, intron 1 of 1)	816085	821177	5093	-	CIL0893S0088
scaffold68792	827593	827886	294	strongHyper	0.212	2.89e-06	Intron (CIL0893S0091.mRNA/CIL0893S0091, intron 1 of 4)	825820	833197	7378	+	CIL0893S0091
scaffold68792	974990	975013	24	strongHypo	-0.262	2.95e-06	Distal Intergenic	972798	973454	657	+	CIL0893S0114
scaffold68792	1557530	1557752	223	strongHypo	-0.339	1.89e-08	Intron (CIL0893S0165.mRNA/CIL0893S0165, intron 1 of 1)	1557038	1565676	8639	+	CIL0893S0165
scaffold68792	2194561	2194582	22	strongHyper	0.29	7.96e-07	Intron (CIL0893S0191.mRNA/CIL0893S0191, intron 8 of 8)	2201498	2212288	10791	+	CIL0893S0192
scaffold68792	2368065	2368077	13	strongHypo	-0.444	1e-10	Promoter (1-2kb)	2364591	2366691	2101	-	CIL0893S0202
scaffold68792	2826286	2826401	116	strongHyper	0.203	0.000625	Distal Intergenic	2815994	2819568	3575	+	CIL0893S0241
scaffold68792	2894300	2894344	45	strongHypo	-0.259	5.67e-12	Distal Intergenic	2901330	2904267	2938	+	CIL0893S0248
scaffold68792	3449484	3449508	25	strongHypo	-0.268	1.16e-05	Promoter (2-3kb)	3444871	3446559	1689	-	CIL0893S0306
scaffold68792	3931008	3931144	137	strongHypo	-0.233	1.59e-06	Intron (CIL0893S0363.mRNA/CIL0893S0363, intron 4 of 14)	3928710	3934603	5894	+	CIL0893S0363
scaffold68792	4089336	4089351	16	strongHyper	0.209	2.03e-05	Promoter (1-2kb)	4090724	4093721	2998	+	CIL0893S0377
scaffold68792	4306540	4306586	47	strongHyper	0.202	2.19e-05	Exon (CIL0893S0396.mRNA/CIL0893S0396, exon 1 of 1)	4305850	4307101	1252	-	CIL0893S0396
scaffold68792	4702111	4702116	6	strongHyper	0.225	1.62e-06	Distal Intergenic	4590154	4616160	26007	-	CIL0893S0432
scaffold68903	313957	313981	25	strongHypo	-0.209	3.25e-07	Promoter (1-2kb)	315955	316964	1010	+	CIL0895S0023
scaffold68903	492814	492844	31	strongHyper	0.22	2.79e-05	Distal Intergenic	483514	487197	3684	-	CIL0895S0037
scaffold68903	577050	577057	8	strongHypo	-0.376	3.68e-10	Distal Intergenic	587105	592769	5665	+	CIL0895S0045
scaffold68903	1078997	1079107	111	strongHypo	-0.291	9.62e-09	Distal Intergenic	1071085	1078658	7574	+	CIL0895S0064
scaffold68903	1591990	1592001	12	strongHypo	-0.244	7.24e-06	Distal Intergenic	1638219	1638383	165	+	CIL0895S0075
scaffold68903	1721957	1721981	25	strongHyper	0.262	2.99e-13	Distal Intergenic	1726017	1729703	3687	+	CIL0895S0079
scaffold68903	1860406	1860469	64	strongHypo	-0.308	2.46e-07	Promoter (2-3kb)	1856832	1857885	1054	-	CIL0895S0084
scaffold68903	2063571	2063613	43	strongHyper	0.354	4.93e-08	Distal Intergenic	2074177	2090236	16060	+	CIL0895S0094
scaffold68903	2076295	2076311	17	strongHypo	-0.353	1.04e-11	Intron (CIL0895S0094.mRNA/CIL0895S0094, intron 1 of 4)	2074177	2090236	16060	+	CIL0895S0094
scaffold68903	3722291	3722319	29	strongHyper	0.335	7.48e-18	Distal Intergenic	3685546	3685805	260	+	CIL0895S0212
scaffold68903	3735607	3735636	30	strongHyper	0.313	6.49e-08	Distal Intergenic	3685546	3685805	260	+	CIL0895S0212
scaffold68903	3958332	3958343	12	strongHypo	-0.251	1.86e-07	Distal Intergenic	3953419	3956922	3504	+	CIL0895S0220
scaffold69014	319378	319402	25	strongHypo	-0.231	1.06e-06	Distal Intergenic	333102	334977	1876	-	CIL0897S0016
scaffold69014	334721	334821	101	strongHypo	-0.244	0.000259	Exon (CIL0897S0016.mRNA/CIL0897S0016, exon 1 of 2)	333102	334977	1876	-	CIL0897S0016
scaffold69014	800032	800037	6	strongHyper	0.261	9.24e-06	Promoter (1-2kb)	801078	803750	2673	+	CIL0897S0038
scaffold69014	1562643	1562703	61	strongHypo	-0.219	5.62e-05	Distal Intergenic	1593745	1595038	1294	+	CIL0897S0083
scaffold69014	1855282	1855448	167	strongHypo	-0.36	6.68e-10	Distal Intergenic	1773571	1792607	19037	-	CIL0897S0091
scaffold69014	2175182	2175239	58	strongHypo	-0.252	1.06e-07	Distal Intergenic	2180728	2196819	16092	+	CIL0897S0099
scaffold69014	2215000	2215095	96	strongHypo	-0.347	1.12e-06	Intron (CIL0897S0100.mRNA/CIL0897S0100, intron 3 of 6)	2209547	2225493	15947	+	CIL0897S0100
scaffold69014	2496272	2496453	182	strongHypo	-0.21	4.91e-08	Distal Intergenic	2531755	2536588	4834	+	CIL0897S0115
scaffold69014	2604049	2604076	28	strongHypo	-0.209	1e-08	Distal Intergenic	2600497	2601009	513	-	CIL0897S0118
scaffold69014	3017613	3017646	34	strongHypo	-0.401	1.41e-11	Distal Intergenic	2988603	2989789	1187	+	CIL0897S0137
scaffold69014	3060608	3060636	29	strongHyper	0.341	3.23e-24	Distal Intergenic	3050650	3057023	6374	-	CIL0897S0139
scaffold69014	3072512	3072543	32	strongHypo	-0.304	1.08e-07	Promoter (<=1kb)	3072778	3077051	4274	+	CIL0897S0141
scaffold69014	3469896	3469912	17	strongHyper	0.346	3.83e-06	Intron (CIL0897S0164.mRNA/CIL0897S0164, intron 2 of 3)	3467077	3472499	5423	-	CIL0897S0164
scaffold69014	3548936	3548968	33	strongHypo	-0.476	4.05e-06	Promoter (2-3kb)	3551771	3553197	1427	+	CIL0897S0172
scaffold69014	3612890	3612928	39	strongHypo	-0.397	8.9e-08	Distal Intergenic	3609224	3612028	2805	+	CIL0897S0175
scaffold69125	399451	399508	58	strongHypo	-0.2	4.06e-07	Distal Intergenic	403649	404610	962	-	CIL0899S0014
scaffold69125	600523	600619	97	strongHypo	-0.353	2.73e-22	Promoter (2-3kb)	602881	607243	4363	+	CIL0899S0024
scaffold69125	1464070	1464331	262	strongHypo	-0.249	6.37e-06	Promoter (1-2kb)	1465505	1468064	2560	+	CIL0899S0069
scaffold69125	2286181	2286209	29	strongHypo	-0.216	2.04e-06	Distal Intergenic	2281521	2283291	1771	+	CIL0899S0121
scaffold69125	2334351	2334362	12	strongHypo	-0.467	8.6e-17	Promoter (1-2kb)	2331894	2333283	1390	-	CIL0899S0127
scaffold69125	2410983	2411051	69	strongHypo	-0.507	9.23e-18	Distal Intergenic	2406399	2407526	1128	+	CIL0899S0130
scaffold69125	2451192	2451260	69	strongHypo	-0.242	5.63e-06	Promoter (1-2kb)	2453183	2454009	827	+	CIL0899S0133
scaffold69125	2460055	2460133	79	strongHyper	0.284	5.09e-06	Distal Intergenic	2466910	2467617	708	+	CIL0899S0134
scaffold69125	2509676	2509795	120	strongHypo	-0.306	2.32e-10	Intron (CIL0899S0137.mRNA/CIL0899S0137, intron 2 of 2)	2508499	2510926	2428	+	CIL0899S0137
scaffold69125	2694575	2694579	5	strongHyper	0.357	1.12e-05	Distal Intergenic	2686341	2691829	5489	+	CIL0899S0151
scaffold69125	3102673	3102715	43	strongHypo	-0.406	1.54e-17	Distal Intergenic	3110175	3110444	270	-	CIL0899S0177
scaffold69125	3268820	3268858	39	strongHypo	-0.206	4.32e-06	Promoter (1-2kb)	3261613	3267550	5938	-	CIL0899S0185
scaffold69238	7010	7024	15	strongHyper	0.208	1.95e-05	Distal Intergenic	7129	10396	3268	-	CIL0902S0002
scaffold69238	29960	30061	102	strongHypo	-0.273	5.71e-07	Intron (CIL0902S0004.mRNA/CIL0902S0004, intron 1 of 1)	28453	30887	2435	+	CIL0902S0004
scaffold69238	442354	442360	7	strongHypo	-0.503	8.99e-20	Distal Intergenic	430450	438578	8129	-	CIL0902S0030
scaffold69238	506752	506901	150	strongHypo	-0.275	3.63e-26	Intron (CIL0902S0035.mRNA/CIL0902S0035, intron 1 of 1)	501228	509283	8056	-	CIL0902S0035
scaffold69238	739125	739143	19	strongHyper	0.458	1.85e-09	Intron (CIL0902S0049.mRNA/CIL0902S0049, intron 11 of 11)	740293	750733	10441	-	CIL0902S0050
scaffold69238	763365	763382	18	strongHyper	0.379	1.05e-18	Promoter (1-2kb)	752612	761526	8915	-	CIL0902S0051
scaffold69238	956953	957003	51	strongHyper	0.268	3.1e-12	Distal Intergenic	936990	937896	907	+	CIL0902S0065
scaffold69238	961294	961300	7	strongHypo	-0.303	1.63e-07	Distal Intergenic	936990	937896	907	+	CIL0902S0065
scaffold69238	1073442	1073482	41	strongHypo	-0.375	8.89e-15	Intron (CIL0902S0071.mRNA/CIL0902S0071, intron 1 of 3)	1043394	1076485	33092	-	CIL0902S0071
scaffold69238	1159080	1159139	60	strongHypo	-0.202	3.51e-05	Intron (CIL0902S0077.mRNA/CIL0902S0077, intron 3 of 4)	1165423	1170050	4628	+	CIL0902S0078
scaffold69238	1159847	1159919	73	strongHypo	-0.256	1.55e-08	Intron (CIL0902S0077.mRNA/CIL0902S0077, intron 3 of 4)	1165423	1170050	4628	+	CIL0902S0078
scaffold69238	1365898	1366007	110	strongHyper	0.255	2.52e-10	Intron (CIL0902S0084.mRNA/CIL0902S0084, intron 3 of 3)	1364361	1367237	2877	+	CIL0902S0084
scaffold69238	2243643	2243650	8	strongHyper	0.238	2.59e-06	Distal Intergenic	2244060	2251320	7261	-	CIL0902S0152
scaffold69238	2319988	2320070	83	strongHypo	-0.35	1.4e-10	5' UTR	2311513	2320095	8583	-	CIL0902S0159
scaffold69238	2445014	2445300	287	strongHyper	0.217	2.25e-07	Distal Intergenic	2454202	2456118	1917	+	CIL0902S0172
scaffold69238	2586125	2586155	31	strongHypo	-0.302	8.97e-09	Distal Intergenic	2593264	2595466	2203	-	CIL0902S0184
scaffold69238	2824821	2824964	144	strongHyper	0.379	1.66e-07	Promoter (2-3kb)	2816880	2822824	5945	-	CIL0902S0199
scaffold69238	3021315	3021327	13	strongHypo	-0.249	0.000427	Promoter (2-3kb)	3023841	3028029	4189	+	CIL0902S0216
scaffold69793	58765	58863	99	strongHypo	-0.21	2.7e-06	Intron (CIL0906S0002.mRNA/CIL0906S0002, intron 3 of 5)	47412	73574	26163	-	CIL0906S0002
scaffold69793	777589	777594	6	strongHyper	0.29	2.41e-07	Intron (CIL0906S0052.mRNA/CIL0906S0052, intron 6 of 10)	762104	827883	65780	-	CIL0906S0052
scaffold69793	955706	955755	50	strongHyper	0.328	1.22e-08	Distal Intergenic	891388	893927	2540	-	CIL0906S0056
scaffold69793	1059253	1059500	248	strongHypo	-0.331	1.86e-12	Promoter (2-3kb)	1061559	1074688	13130	+	CIL0906S0062
scaffold69793	1792509	1792524	16	strongHyper	0.305	3.08e-08	Distal Intergenic	1765566	1766530	965	+	CIL0906S0092
scaffold69793	1976496	1976702	207	strongHyper	0.316	1.03e-06	Promoter (1-2kb)	1973764	1974835	1072	-	CIL0906S0097
scaffold69793	2169472	2169513	42	strongHyper	0.299	7.55e-08	Distal Intergenic	2154525	2155522	998	-	CIL0906S0103
scaffold69793	2861555	2861564	10	strongHypo	-0.253	3.5e-06	Distal Intergenic	2857902	2858547	646	-	CIL0906S0146
scaffold69793	2866763	2866841	79	strongHyper	0.286	6.33e-09	Distal Intergenic	2857902	2858547	646	-	CIL0906S0146
scaffold69793	2871008	2871060	53	strongHyper	0.254	0.0102	Distal Intergenic	2877002	2880515	3514	+	CIL0906S0148
scaffold69793	3077213	3077269	57	strongHypo	-0.252	8.64e-07	Distal Intergenic	2922258	2964702	42445	+	CIL0906S0152
scaffold69793	3337024	3337151	128	strongHyper	0.2	5.68e-09	Distal Intergenic	3334421	3336028	1608	+	CIL0906S0157
scaffold69793	3556238	3556245	8	strongHypo	-0.286	3.46e-06	Distal Intergenic	3563902	3570936	7035	+	CIL0906S0167
scaffold69904	379037	379199	163	strongHypo	-0.224	9.25e-06	Exon (CIL0908S0026.mRNA/CIL0908S0026, exon 6 of 13)	377029	381817	4789	-	CIL0908S0026
scaffold69904	515573	515600	28	strongHypo	-0.237	3.31e-07	Distal Intergenic	523693	526718	3026	+	CIL0908S0039
scaffold69904	732014	732055	42	strongHypo	-0.243	5.04e-08	Promoter (2-3kb)	728742	729437	696	-	CIL0908S0049
scaffold69904	741877	741923	47	strongHyper	0.243	1.47e-05	Distal Intergenic	743333	751601	8269	-	CIL0908S0050
scaffold69904	824183	824369	187	strongHyper	0.203	1.79e-05	Promoter (<=1kb)	824863	833142	8280	+	CIL0908S0054
scaffold69904	914105	914122	18	strongHypo	-0.347	5.24e-19	Distal Intergenic	927112	928349	1238	-	CIL0908S0061
scaffold69904	3057168	3057194	27	strongHyper	0.318	7.74e-06	Distal Intergenic	3060644	3071912	11269	+	CIL0908S0186
scaffold69904	3083850	3084020	171	strongHypo	-0.217	1.79e-06	3' UTR	3075378	3084130	8753	+	CIL0908S0187
scaffold70015	53253	53340	88	strongHyper	0.234	2.5e-06	Promoter (1-2kb)	54813	71546	16734	+	CIL0909S0004
scaffold70015	708247	708326	80	strongHyper	0.269	2.23e-06	Promoter (<=1kb)	709082	711950	2869	+	CIL0909S0067
scaffold70015	906940	907001	62	strongHyper	0.231	7.97e-05	Intron (CIL0909S0077.mRNA/CIL0909S0077, intron 1 of 9)	906274	914806	8533	+	CIL0909S0077
scaffold70015	1185136	1185207	72	strongHypo	-0.232	0.00483	Exon (CIL0909S0094.mRNA/CIL0909S0094, exon 4 of 6)	1181544	1185976	4433	+	CIL0909S0094
scaffold70015	1526927	1527029	103	strongHyper	0.288	3.25e-07	Distal Intergenic	1498941	1502057	3117	+	CIL0909S0105
scaffold70015	1560559	1560567	9	strongHypo	-0.297	2.16e-06	Distal Intergenic	1582815	1584547	1733	-	CIL0909S0110
scaffold70015	1619201	1619483	283	strongHyper	0.201	1.07e-08	Distal Intergenic	1629093	1633744	4652	-	CIL0909S0112
scaffold70015	1635021	1635048	28	strongHypo	-0.215	5.41e-09	Promoter (1-2kb)	1629093	1633744	4652	-	CIL0909S0112
scaffold70015	2213177	2213199	23	strongHypo	-0.27	2.52e-07	Exon (CIL0909S0154.mRNA/CIL0909S0154, exon 1 of 4)	2212741	2216324	3584	+	CIL0909S0154
scaffold70015	2426019	2426181	163	strongHypo	-0.316	2.35e-10	Distal Intergenic	2419716	2422550	2835	-	CIL0909S0169
scaffold70015	2736533	2736691	159	strongHypo	-0.436	1.51e-19	Distal Intergenic	2725229	2729142	3914	-	CIL0909S0205
scaffold70015	3092526	3092544	19	strongHypo	-0.375	5.44e-05	Exon (CIL0909S0241.mRNA/CIL0909S0241, exon 1 of 1)	3091349	3094306	2958	-	CIL0909S0241
scaffold70126	70648	70817	170	strongHypo	-0.21	1.54e-05	Promoter (2-3kb)	67540	67956	417	-	CIL0912S0006
scaffold70126	490355	490369	15	strongHypo	-0.408	6.37e-06	Promoter (2-3kb)	493181	496494	3314	+	CIL0912S0030
scaffold70126	585592	585621	30	strongHypo	-0.252	3.69e-06	Distal Intergenic	575711	582303	6593	-	CIL0912S0040
scaffold70126	746011	746181	171	strongHyper	0.323	5.73e-06	Intron (CIL0912S0059.mRNA/CIL0912S0059, intron 7 of 39)	742247	763456	21210	+	CIL0912S0059
scaffold70126	887083	887096	14	strongHypo	-0.31	1.5e-08	Promoter (<=1kb)	887973	891972	4000	+	CIL0912S0066
scaffold70126	1756774	1757014	241	strongHyper	0.296	1.71e-08	Distal Intergenic	1750809	1752448	1640	+	CIL0912S0126
scaffold70126	1808676	1808704	29	strongHypo	-0.23	0.00595	Promoter (1-2kb)	1802526	1806756	4231	-	CIL0912S0131
scaffold70126	2326611	2326725	115	strongHypo	-0.26	3.9e-07	Distal Intergenic	2332502	2335149	2648	+	CIL0912S0169
scaffold70126	2440780	2440797	18	strongHyper	0.362	1.52e-12	Promoter (<=1kb)	2441358	2450392	9035	+	CIL0912S0179
scaffold70126	2584678	2584699	22	strongHyper	0.329	3.84e-05	Distal Intergenic	2560426	2567730	7305	+	CIL0912S0187
scaffold70237	1090531	1090760	230	strongHypo	-0.34	8.73e-15	Promoter (2-3kb)	1087662	1087986	325	-	CIL0914S0056
scaffold70237	1534299	1534658	360	strongHypo	-0.243	6.48e-14	Distal Intergenic	1519715	1521034	1320	-	CIL0914S0081
scaffold70237	1535080	1535145	66	strongHyper	0.24	2.75e-06	Distal Intergenic	1548195	1549307	1113	+	CIL0914S0086
scaffold70237	1629789	1630073	285	strongHypo	-0.206	3.33e-12	Promoter (1-2kb)	1624638	1629012	4375	-	CIL0914S0091
scaffold70237	2127261	2127296	36	strongHyper	0.255	0.000203	Distal Intergenic	2132485	2132859	375	-	CIL0914S0126
scaffold70237	2147775	2147922	148	strongHypo	-0.32	2.95e-05	Promoter (1-2kb)	2149315	2152580	3266	+	CIL0914S0129
scaffold70237	2581813	2581825	13	strongHypo	-0.269	7.2e-09	Distal Intergenic	2597609	2598945	1337	+	CIL0914S0149
scaffold70237	2686327	2686395	69	strongHyper	0.28	5.25e-08	Promoter (1-2kb)	2687858	2692323	4466	+	CIL0914S0153
scaffold70237	2780138	2780156	19	strongHyper	0.247	2.01e-05	Intron (CIL0914S0154.mRNA/CIL0914S0154, intron 7 of 12)	2761103	2839714	78612	+	CIL0914S0154
scaffold70237	2789773	2789788	16	strongHyper	0.227	1.95e-06	Intron (CIL0914S0154.mRNA/CIL0914S0154, intron 7 of 12)	2761103	2839714	78612	+	CIL0914S0154
scaffold70349	21909	21955	47	strongHypo	-0.309	2.18e-08	Distal Intergenic	44	2329	2286	-	CIL0917S0001
scaffold70349	194773	194863	91	strongHyper	0.267	2.51e-06	Distal Intergenic	221637	226913	5277	-	CIL0917S0011
scaffold70349	333352	333671	320	strongHypo	-0.718	3.91e-85	Distal Intergenic	303484	305704	2221	+	CIL0917S0017
scaffold70349	487897	488002	106	strongHypo	-0.202	0.00032	Distal Intergenic	481884	483257	1374	-	CIL0917S0027
scaffold70349	490035	490108	74	strongHypo	-0.267	0.000436	Distal Intergenic	481884	483257	1374	-	CIL0917S0027
scaffold70349	538571	538577	7	strongHypo	-0.287	1.28e-08	Distal Intergenic	577566	577955	390	-	CIL0917S0030
scaffold70349	803268	803272	5	strongHypo	-0.418	4.56e-08	Exon (CIL0917S0049.mRNA/CIL0917S0049, exon 1 of 5)	803026	807280	4255	+	CIL0917S0049
scaffold70349	1756624	1756918	295	strongHyper	0.278	2.81e-09	Intron (CIL0917S0142.mRNA/CIL0917S0142, intron 3 of 6)	1746260	1765627	19368	-	CIL0917S0142
scaffold70349	1766685	1766719	35	strongHypo	-0.21	6.17e-06	Promoter (1-2kb)	1746260	1765627	19368	-	CIL0917S0142
scaffold70349	1780174	1780204	31	strongHyper	0.272	2.66e-08	Distal Intergenic	1746260	1765627	19368	-	CIL0917S0142
scaffold70349	1817923	1818060	138	strongHypo	-0.317	6e-12	Promoter (<=1kb)	1817948	1820337	2390	+	CIL0917S0144
scaffold70349	1934189	1934201	13	strongHyper	0.459	1.83e-07	Distal Intergenic	1928698	1931114	2417	+	CIL0917S0145
scaffold70349	2225554	2225573	20	strongHyper	0.22	6.63e-05	Distal Intergenic	2212822	2215855	3034	+	CIL0917S0149
scaffold70460	207312	207334	23	strongHypo	-0.356	2.35e-15	Distal Intergenic	205284	206163	880	+	CIL0919S0021
scaffold70460	422995	423025	31	strongHypo	-0.249	5.44e-05	Distal Intergenic	425404	427371	1968	-	CIL0919S0044
scaffold70460	1247574	1247599	26	strongHyper	0.257	2.35e-08	Promoter (1-2kb)	1249563	1251486	1924	+	CIL0919S0087
scaffold70460	1347251	1347302	52	strongHyper	0.323	4.51e-09	Exon (CIL0919S0097.mRNA/CIL0919S0097, exon 1 of 1)	1347204	1347602	399	-	CIL0919S0097
scaffold70460	1411258	1411454	197	strongHypo	-0.32	4.16e-05	Promoter (2-3kb)	1406969	1408556	1588	-	CIL0919S0107
scaffold70460	1506533	1506598	66	strongHyper	0.318	3.28e-05	Exon (CIL0919S0121.mRNA/CIL0919S0121, exon 3 of 3)	1504164	1507889	3726	+	CIL0919S0121
scaffold70460	1822061	1822081	21	strongHyper	0.273	5.3e-05	Exon (CIL0919S0161.mRNA/CIL0919S0161, exon 12 of 14)	1814945	1818496	3552	-	CIL0919S0160
scaffold70460	2671805	2671849	45	strongHyper	0.333	1.93e-08	Distal Intergenic	2663986	2670302	6317	+	CIL0919S0214
scaffold70460	3024083	3024250	168	strongHypo	-0.358	2.41e-06	Distal Intergenic	2960252	2985516	25265	+	CIL0919S0230
scaffold70682	492273	492285	13	strongHypo	-0.207	4.51e-08	Promoter (2-3kb)	487478	490262	2785	-	CIL0921S0023
scaffold70682	577742	577771	30	strongHypo	-0.454	7.87e-10	Distal Intergenic	584503	585039	537	+	CIL0921S0028
scaffold70682	602710	602754	45	strongHypo	-0.364	2.02e-05	Distal Intergenic	584503	585039	537	+	CIL0921S0028
scaffold70682	618579	618599	21	strongHypo	-0.268	2.49e-06	Distal Intergenic	640145	640372	228	-	CIL0921S0031
scaffold70682	743280	743540	261	strongHyper	0.252	0.000328	Promoter (1-2kb)	744346	744904	559	+	CIL0921S0034
scaffold70682	800644	800669	26	strongHypo	-0.367	5.04e-07	Distal Intergenic	801918	804284	2367	-	CIL0921S0038
scaffold70682	1011534	1011565	32	strongHyper	0.25	2.79e-11	Distal Intergenic	1077884	1082853	4970	+	CIL0921S0045
scaffold70682	1545568	1545765	198	strongHyper	0.234	3e-06	3' UTR	1545352	1548518	3167	-	CIL0921S0082
scaffold70682	1546366	1546438	73	strongHyper	0.216	0.0106	Exon (CIL0921S0082.mRNA/CIL0921S0082, exon 4 of 6)	1545352	1548518	3167	-	CIL0921S0082
scaffold70682	1634252	1634498	247	strongHypo	-0.277	1.88e-19	Distal Intergenic	1637489	1637896	408	-	CIL0921S0088
scaffold70682	1910489	1910529	41	strongHypo	-0.381	6.77e-15	Distal Intergenic	1866919	1901786	34868	-	CIL0921S0100
scaffold70682	1981774	1981809	36	strongHyper	0.318	3.8e-09	Distal Intergenic	1986133	1988761	2629	+	CIL0921S0102
scaffold70682	1985753	1985769	17	strongHypo	-0.286	3.19e-05	Promoter (<=1kb)	1986133	1988761	2629	+	CIL0921S0102
scaffold70682	2378427	2378496	70	strongHyper	0.281	8.72e-08	Promoter (2-3kb)	2380939	2385496	4558	+	CIL0921S0116
scaffold70682	2841624	2841654	31	strongHyper	0.293	1.48e-09	Distal Intergenic	2853906	2861357	7452	-	CIL0921S0137
scaffold70682	2971858	2971983	126	strongHypo	-0.228	8.69e-05	Distal Intergenic	2969395	2971447	2053	+	CIL0921S0144
scaffold70793	24759	25055	297	strongHyper	0.265	2.29e-10	Distal Intergenic	38707	38916	210	+	CIL0922S0002
scaffold70793	111146	111184	39	strongHypo	-0.29	2.01e-09	Promoter (1-2kb)	112228	115277	3050	+	CIL0922S0008
scaffold70793	262533	262562	30	strongHypo	-0.226	9.67e-05	Exon (CIL0922S0022.mRNA/CIL0922S0022, exon 8 of 12)	260110	274680	14571	-	CIL0922S0022
scaffold70793	372386	372391	6	strongHyper	0.286	5.77e-05	Promoter (2-3kb)	375034	377363	2330	+	CIL0922S0032
scaffold70793	501136	501142	7	strongHyper	0.252	2.68e-07	Distal Intergenic	493797	496405	2609	-	CIL0922S0042
scaffold70793	544056	544130	75	strongHyper	0.28	2.21e-06	Distal Intergenic	547712	552987	5276	-	CIL0922S0047
scaffold70793	546344	546415	72	strongHyper	0.344	2.45e-05	Distal Intergenic	547712	552987	5276	-	CIL0922S0047
scaffold70793	651061	651072	12	strongHypo	-0.348	1.49e-11	Promoter (1-2kb)	652840	654539	1700	+	CIL0922S0052
scaffold70793	867937	867942	6	strongHypo	-0.285	5.91e-07	Exon (CIL0922S0060.mRNA/CIL0922S0060, exon 3 of 3)	866739	867071	333	+	CIL0922S0059
scaffold70793	1080324	1080537	214	strongHypo	-0.267	5.55e-19	Intron (CIL0922S0085.mRNA/CIL0922S0085, intron 1 of 2)	1079512	1082708	3197	+	CIL0922S0085
scaffold70793	1325491	1325595	105	strongHyper	0.294	3.2e-07	Promoter (1-2kb)	1321655	1323858	2204	-	CIL0922S0115
scaffold70793	1402063	1402132	70	strongHypo	-0.317	4.4e-11	Distal Intergenic	1396253	1400544	4292	+	CIL0922S0125
scaffold70793	1540710	1540918	209	strongHyper	0.273	4.1e-08	Intron (CIL0922S0148.mRNA/CIL0922S0148, intron 2 of 3)	1546216	1549467	3252	-	CIL0922S0149
scaffold70793	1653241	1653300	60	strongHyper	0.368	1.31e-05	Distal Intergenic	1616759	1649480	32722	-	CIL0922S0160
scaffold70793	1738939	1738967	29	strongHyper	0.334	3.04e-09	Promoter (1-2kb)	1733567	1737234	3668	-	CIL0922S0176
scaffold70793	1742919	1742946	28	strongHyper	0.372	2.78e-14	Distal Intergenic	1733567	1737234	3668	-	CIL0922S0176
scaffold70793	1771876	1771910	35	strongHypo	-0.24	2.68e-05	Promoter (1-2kb)	1768287	1770588	2302	-	CIL0922S0183
scaffold70793	2189347	2189411	65	strongHyper	0.291	0.000125	Distal Intergenic	2194335	2201110	6776	+	CIL0922S0218
scaffold70793	2301909	2302032	124	strongHypo	-0.58	1.81e-10	Distal Intergenic	2258041	2263935	5895	-	CIL0922S0223
scaffold70793	2410504	2410693	190	strongHypo	-0.226	6.03e-09	Distal Intergenic	2427112	2430629	3518	-	CIL0922S0229
scaffold70793	2966470	2966490	21	strongHyper	0.388	1.91e-12	Promoter (1-2kb)	2952489	2965188	12700	-	CIL0922S0252
scaffold70793	3002940	3002968	29	strongHypo	-0.222	2.09e-07	3' UTR	3002844	3014880	12037	-	CIL0922S0254
scaffold70904	111817	111889	73	strongHypo	-0.259	2.16e-06	Promoter (2-3kb)	113907	115776	1870	+	CIL0923S0010
scaffold70904	328470	328580	111	strongHypo	-0.302	3.16e-15	Distal Intergenic	327005	327612	608	+	CIL0923S0034
scaffold70904	535608	535688	81	strongHypo	-0.229	4.69e-11	Intron (CIL0923S0062.mRNA/CIL0923S0062, intron 2 of 6)	524482	563509	39028	+	CIL0923S0062
scaffold70904	674643	674707	65	strongHypo	-0.272	3.29e-05	Promoter (1-2kb)	668379	673451	5073	-	CIL0923S0074
scaffold70904	977657	977813	157	strongHypo	-0.265	4.82e-11	Distal Intergenic	1001318	1007938	6621	-	CIL0923S0115
scaffold70904	1008609	1008692	84	strongHypo	-0.214	3.5e-06	Promoter (<=1kb)	1001318	1007938	6621	-	CIL0923S0115
scaffold70904	1097687	1097749	63	strongHypo	-0.206	3.08e-07	Promoter (1-2kb)	1089225	1096461	7237	-	CIL0923S0123
scaffold70904	1144822	1144847	26	strongHypo	-0.236	3.78e-12	Promoter (1-2kb)	1140649	1142937	2289	-	CIL0923S0127
scaffold70904	1347814	1347908	95	strongHypo	-0.226	1.78e-05	Distal Intergenic	1348887	1350591	1705	-	CIL0923S0147
scaffold70904	1409107	1409147	41	strongHyper	0.352	2.97e-06	Intron (CIL0923S0153.mRNA/CIL0923S0153, intron 2 of 3)	1405908	1416201	10294	+	CIL0923S0153
scaffold70904	1605115	1605122	8	strongHypo	-0.33	4.24e-08	Promoter (1-2kb)	1601414	1603807	2394	-	CIL0923S0179
scaffold70904	2020851	2020906	56	strongHypo	-0.379	0.000141	Promoter (2-3kb)	2014785	2017978	3194	-	CIL0923S0222
scaffold70904	2302443	2302448	6	strongHyper	0.4	1.63e-05	Distal Intergenic	2312804	2316490	3687	+	CIL0923S0247
scaffold70904	2524452	2524460	9	strongHypo	-0.284	8.49e-06	Distal Intergenic	2525569	2527150	1582	-	CIL0923S0261
scaffold70904	2643313	2643443	131	strongHypo	-0.317	3.66e-08	Distal Intergenic	2658341	2659429	1089	-	CIL0923S0268
scaffold71015	109167	109184	18	strongHypo	-0.409	9.66e-06	Exon (CIL0925S0012.mRNA/CIL0925S0012, exon 2 of 2)	109014	109497	484	-	CIL0925S0012
scaffold71015	165638	165647	10	strongHyper	0.286	4.59e-10	Distal Intergenic	157454	158729	1276	+	CIL0925S0017
scaffold71015	307614	307739	126	strongHypo	-0.221	4.76e-07	Distal Intergenic	310638	315215	4578	+	CIL0925S0023
scaffold71015	619052	619068	17	strongHyper	0.239	7.91e-06	Distal Intergenic	590025	593086	3062	+	CIL0925S0046
scaffold71015	1367737	1367767	31	strongHypo	-0.406	1.49e-08	Distal Intergenic	1371369	1372436	1068	+	CIL0925S0083
scaffold71015	1383554	1383569	16	strongHyper	0.302	8.76e-05	Distal Intergenic	1377699	1381377	3679	+	CIL0925S0084
scaffold71015	1384961	1384999	39	strongHypo	-0.416	2.03e-07	Distal Intergenic	1377699	1381377	3679	+	CIL0925S0084
scaffold71015	1504341	1504354	14	strongHyper	0.238	0.000906	Exon (CIL0925S0092.mRNA/CIL0925S0092, exon 1 of 1)	1503464	1506440	2977	+	CIL0925S0092
scaffold71015	1545397	1545420	24	strongHypo	-0.266	1.81e-07	Distal Intergenic	1536781	1541038	4258	-	CIL0925S0094
scaffold71015	1766244	1766266	23	strongHypo	-0.5	9.02e-17	Distal Intergenic	1763165	1763401	237	+	CIL0925S0108
scaffold71015	1868410	1868514	105	strongHyper	0.229	4.89e-06	Promoter (1-2kb)	1855994	1867252	11259	-	CIL0925S0114
scaffold71015	1871555	1871593	39	strongHypo	-0.254	0.000228	Distal Intergenic	1855994	1867252	11259	-	CIL0925S0114
scaffold71015	1875040	1875088	49	strongHypo	-0.413	5.96e-11	Distal Intergenic	1855994	1867252	11259	-	CIL0925S0114
scaffold71015	2215045	2215082	38	strongHypo	-0.247	3.44e-07	Promoter (2-3kb)	2217155	2218426	1272	+	CIL0925S0130
scaffold71126	2517	2702	186	strongHyper	0.239	0.000293	Distal Intergenic	11228	13662	2435	+	CIL0929S0001
scaffold71126	244054	244123	70	strongHypo	-0.326	4.44e-10	Distal Intergenic	234736	240173	5438	-	CIL0929S0023
scaffold71126	484990	485109	120	strongHyper	0.302	5.79e-10	Distal Intergenic	490544	490939	396	-	CIL0929S0044
scaffold71126	558747	558769	23	strongHypo	-0.443	5.04e-08	Promoter (2-3kb)	561545	568578	7034	+	CIL0929S0051
scaffold71126	559243	559255	13	strongHypo	-0.497	6.29e-13	Promoter (2-3kb)	561545	568578	7034	+	CIL0929S0051
scaffold71126	1102742	1102753	12	strongHyper	0.25	3.33e-06	Intron (CIL0929S0100.mRNA/CIL0929S0100, intron 2 of 2)	1101170	1104748	3579	-	CIL0929S0100
scaffold71126	1607518	1607647	130	strongHypo	-0.26	2.18e-08	Promoter (1-2kb)	1609197	1612241	3045	+	CIL0929S0158
scaffold71126	1803892	1803941	50	strongHypo	-0.311	2.92e-05	Distal Intergenic	1781649	1797341	15693	-	CIL0929S0181
scaffold71126	2035847	2035856	10	strongHyper	0.268	5.94e-06	Promoter (2-3kb)	2038406	2039509	1104	+	CIL0929S0195
scaffold71348	125537	125663	127	strongHypo	-0.234	7.77e-09	Distal Intergenic	133074	162121	29048	+	CIL0935S0014
scaffold71348	412605	412642	38	strongHypo	-0.252	1.82e-06	Promoter (2-3kb)	415141	416894	1754	+	CIL0935S0031
scaffold71348	615298	615331	34	strongHyper	0.227	2.78e-07	Distal Intergenic	647101	647421	321	-	CIL0935S0041
scaffold71348	1347725	1347759	35	strongHypo	-0.395	4.63e-15	3' UTR	1313721	1347768	34048	+	CIL0935S0081
scaffold71348	1694064	1694242	179	strongHyper	0.329	2.63e-09	Distal Intergenic	1687755	1690286	2532	-	CIL0935S0093
scaffold71348	2108387	2108399	13	strongHyper	0.274	5.88e-08	Intron (CIL0935S0136.mRNA/CIL0935S0136, intron 3 of 4)	2106943	2109341	2399	+	CIL0935S0136
scaffold71460	64895	64902	8	strongHyper	0.546	1.26e-13	Distal Intergenic	54046	61873	7828	-	CIL0937S0006
scaffold71460	361672	361688	17	strongHypo	-0.38	6.75e-11	Intron (CIL0937S0036.mRNA/CIL0937S0036, intron 1 of 1)	360683	365627	4945	-	CIL0937S0036
scaffold71460	524765	524797	33	strongHypo	-0.33	6.31e-06	Exon (CIL0937S0055.mRNA/CIL0937S0055, exon 1 of 1)	524667	525464	798	+	CIL0937S0055
scaffold71460	857838	857878	41	strongHyper	0.309	4.86e-07	Distal Intergenic	848961	851730	2770	+	CIL0937S0087
scaffold71460	891036	891050	15	strongHypo	-0.321	1.36e-12	Promoter (<=1kb)	891737	893631	1895	+	CIL0937S0088
scaffold71460	1557895	1557955	61	strongHyper	0.349	9.66e-11	Distal Intergenic	1560864	1562731	1868	-	CIL0937S0111
scaffold71460	1601839	1601872	34	strongHyper	0.302	3.59e-08	Promoter (1-2kb)	1603648	1612815	9168	+	CIL0937S0114
scaffold71460	1606495	1606614	120	strongHyper	0.203	0.00147	Intron (CIL0937S0114.mRNA/CIL0937S0114, intron 2 of 3)	1603648	1612815	9168	+	CIL0937S0114
scaffold71460	1706834	1706851	18	strongHypo	-0.531	6.04e-08	Distal Intergenic	1703713	1705330	1618	+	CIL0937S0120
scaffold71460	1772332	1772364	33	strongHypo	-0.319	8.22e-14	Distal Intergenic	1759890	1761394	1505	-	CIL0937S0123
scaffold71460	2140107	2140136	30	strongHyper	0.223	6.16e-08	Distal Intergenic	2112021	2112263	243	+	CIL0937S0153
scaffold71460	2267917	2267948	32	strongHyper	0.263	1.73e-25	Promoter (2-3kb)	2254917	2265930	11014	-	CIL0937S0156
scaffold71682	84393	84422	30	strongHypo	-0.324	1.34e-10	Distal Intergenic	73470	74586	1117	+	CIL0938S0004
scaffold71682	225705	225751	47	strongHyper	0.319	1.74e-08	Distal Intergenic	226562	230299	3738	-	CIL0938S0011
scaffold71682	442823	442856	34	strongHypo	-0.272	7.97e-07	Promoter (1-2kb)	443871	444389	519	+	CIL0938S0022
scaffold71682	562563	562584	22	strongHyper	0.235	0.000157	Promoter (1-2kb)	561007	561455	449	-	CIL0938S0028
scaffold71682	562858	562898	41	strongHypo	-0.22	0.000213	Promoter (1-2kb)	561007	561455	449	-	CIL0938S0028
scaffold71682	620277	620475	199	strongHyper	0.286	4.8e-17	Intron (CIL0938S0034.mRNA/CIL0938S0034, intron 4 of 6)	616517	721225	104709	+	CIL0938S0034
scaffold71682	1115499	1115592	94	strongHyper	0.236	1.76e-14	Distal Intergenic	1094062	1095072	1011	-	CIL0938S0056
scaffold71682	2241625	2241781	157	strongHypo	-0.289	2.49e-08	Distal Intergenic	2234192	2236565	2374	+	CIL0938S0110
scaffold71682	2242012	2242124	113	strongHyper	0.213	1.08e-06	Distal Intergenic	2234192	2236565	2374	+	CIL0938S0110
scaffold71682	2831343	2831396	54	strongHyper	0.351	9.1e-09	Distal Intergenic	2834358	2835350	993	-	CIL0938S0151
scaffold71793	146892	146896	5	strongHypo	-0.366	3.03e-07	Distal Intergenic	154246	157754	3509	+	CIL0940S0010
scaffold71793	192899	192969	71	strongHypo	-0.304	4e-07	Distal Intergenic	192365	192862	498	+	CIL0940S0014
scaffold71793	233193	233210	18	strongHyper	0.353	4.56e-12	Distal Intergenic	234512	237338	2827	-	CIL0940S0017
scaffold71793	522636	522641	6	strongHyper	0.329	2.3e-07	Distal Intergenic	507715	515477	7763	+	CIL0940S0035
scaffold71793	622947	622980	34	strongHyper	0.234	0.000122	Promoter (1-2kb)	618575	621195	2621	-	CIL0940S0043
scaffold71793	670473	670499	27	strongHypo	-0.304	1.77e-06	Distal Intergenic	666486	667394	909	-	CIL0940S0046
scaffold71793	671419	671500	82	strongHypo	-0.27	4.86e-14	Distal Intergenic	666486	667394	909	-	CIL0940S0046
scaffold71793	849756	849821	66	strongHypo	-0.325	6.5e-19	Promoter (1-2kb)	845704	848602	2899	-	CIL0940S0060
scaffold71793	925599	925679	81	strongHyper	0.226	4.93e-08	Promoter (1-2kb)	926869	927870	1002	+	CIL0940S0071
scaffold71793	1055352	1055388	37	strongHypo	-0.206	7.9e-05	Distal Intergenic	1066103	1069339	3237	-	CIL0940S0075
scaffold71793	1080799	1080850	52	strongHyper	0.206	0.00138	Distal Intergenic	1081938	1085812	3875	-	CIL0940S0076
scaffold71793	1193662	1193810	149	strongHyper	0.299	5.49e-08	Distal Intergenic	1212712	1216312	3601	+	CIL0940S0087
scaffold71793	1750950	1750991	42	strongHyper	0.318	9.94e-10	Promoter (2-3kb)	1753097	1756001	2905	+	CIL0940S0139
scaffold71793	1834161	1834195	35	strongHyper	0.236	8.24e-06	Distal Intergenic	1830941	1833829	2889	+	CIL0940S0150
scaffold71793	2203712	2203725	14	strongHyper	0.266	1.46e-10	Promoter (1-2kb)	2204716	2207417	2702	+	CIL0940S0192
scaffold72015	201657	201685	29	strongHyper	0.286	1.33e-08	Promoter (<=1kb)	195944	200842	4899	-	CIL0942S0005
scaffold72015	442818	442833	16	strongHyper	0.263	4.61e-07	Intron (CIL0942S0042.mRNA/CIL0942S0042, intron 8 of 15)	438222	445140	6919	-	CIL0942S0042
scaffold72015	595486	595735	250	strongHyper	0.204	1.67e-08	3' UTR	595457	596347	891	-	CIL0942S0072
scaffold72015	645700	645744	45	strongHyper	0.221	4.4e-09	Promoter (<=1kb)	636104	645486	9383	-	CIL0942S0078
scaffold72015	757327	757396	70	strongHypo	-0.225	3.71e-06	Promoter (<=1kb)	752099	756553	4455	-	CIL0942S0095
scaffold72015	1267608	1267619	12	strongHyper	0.334	9.11e-07	Distal Intergenic	1268526	1271220	2695	-	CIL0942S0133
scaffold72015	1284264	1284315	52	strongHyper	0.229	6.51e-08	Distal Intergenic	1286282	1295375	9094	-	CIL0942S0134
scaffold72015	1979411	1979640	230	strongHypo	-0.226	3.62e-16	Distal Intergenic	1956001	1965009	9009	+	CIL0942S0158
scaffold72015	2080313	2080412	100	strongHypo	-0.255	8.44e-08	Distal Intergenic	2083671	2085319	1649	+	CIL0942S0159
scaffold72015	2296901	2297046	146	strongHyper	0.28	1.13e-07	3' UTR	2289350	2297380	8031	+	CIL0942S0173
scaffold72015	2374494	2374512	19	strongHyper	0.321	6.57e-07	Promoter (1-2kb)	2372113	2373252	1140	-	CIL0942S0178
scaffold72015	2403851	2403955	105	strongHyper	0.2	4.29e-06	Distal Intergenic	2419011	2431194	12184	+	CIL0942S0182
scaffold72015	2762462	2762564	103	strongHyper	0.279	2.81e-07	Promoter (1-2kb)	2764179	2767297	3119	+	CIL0942S0214
scaffold72126	182634	182696	63	strongHypo	-0.436	5.29e-27	Distal Intergenic	161999	165318	3320	+	CIL0945S0013
scaffold72126	218738	218829	92	strongHyper	0.201	3.02e-08	Promoter (<=1kb)	217429	218213	785	-	CIL0945S0015
scaffold72126	277362	277397	36	strongHypo	-0.328	1.33e-09	Distal Intergenic	282515	285360	2846	+	CIL0945S0018
scaffold72126	571062	571081	20	strongHyper	0.345	1.92e-09	Distal Intergenic	555068	555361	294	+	CIL0945S0037
scaffold72126	948568	948617	50	strongHypo	-0.294	6.6e-07	Distal Intergenic	956145	966862	10718	+	CIL0945S0055
scaffold72126	1079659	1079665	7	strongHypo	-0.289	0.00118	Exon (CIL0945S0059.mRNA/CIL0945S0059, exon 6 of 7)	1073298	1080886	7589	+	CIL0945S0059
scaffold72126	1451674	1451865	192	strongHyper	0.2	7.53e-10	Distal Intergenic	1457272	1459940	2669	-	CIL0945S0078
scaffold72126	1553850	1553930	81	strongHypo	-0.208	1.77e-05	Distal Intergenic	1545914	1548980	3067	-	CIL0945S0086
scaffold72126	1725083	1725145	63	strongHyper	0.203	6.1e-05	Distal Intergenic	1730723	1733072	2350	-	CIL0945S0098
scaffold72126	1914889	1914902	14	strongHyper	0.285	5.16e-06	Distal Intergenic	1919368	1920217	850	-	CIL0945S0111
scaffold72126	2067085	2067186	102	strongHyper	0.31	7.14e-09	Distal Intergenic	2069321	2071890	2570	-	CIL0945S0123
scaffold72126	2310815	2310856	42	strongHypo	-0.278	1.28e-09	Distal Intergenic	2357022	2361656	4635	+	CIL0945S0147
scaffold72126	2475235	2475263	29	strongHypo	-0.24	2.09e-06	Distal Intergenic	2478728	2479408	681	-	CIL0945S0152
scaffold72126	2496885	2496927	43	strongHyper	0.308	4.55e-06	Distal Intergenic	2478728	2479408	681	-	CIL0945S0152
scaffold72126	2601754	2601891	138	strongHyper	0.42	6.8e-11	Promoter (2-3kb)	2590981	2599476	8496	-	CIL0945S0158
scaffold72237	148026	148062	37	strongHyper	0.216	9.41e-05	Promoter (<=1kb)	148542	153914	5373	+	CIL0946S0005
scaffold72237	202974	203040	67	strongHypo	-0.373	1.07e-09	Distal Intergenic	204202	206903	2702	-	CIL0946S0009
scaffold72237	449554	449634	81	strongHyper	0.283	2.03e-08	Distal Intergenic	460131	462673	2543	+	CIL0946S0026
scaffold72237	449913	450093	181	strongHyper	0.329	3.39e-14	Distal Intergenic	460131	462673	2543	+	CIL0946S0026
scaffold72237	527674	527708	35	strongHypo	-0.502	2.42e-09	Distal Intergenic	521410	523208	1799	+	CIL0946S0029
scaffold72237	712246	712302	57	strongHypo	-0.331	1.65e-05	Promoter (1-2kb)	713977	717176	3200	+	CIL0946S0046
scaffold72237	787566	787656	91	strongHyper	0.3	1.23e-10	Distal Intergenic	790942	803850	12909	+	CIL0946S0052
scaffold72237	1224015	1224067	53	strongHyper	0.308	2.75e-10	Distal Intergenic	1186625	1191969	5345	+	CIL0946S0074
scaffold72237	1232725	1232757	33	strongHypo	-0.277	3.19e-05	Distal Intergenic	1186625	1191969	5345	+	CIL0946S0074
scaffold72237	1703693	1704063	371	strongHypo	-0.229	4.65e-05	Distal Intergenic	1690819	1692365	1547	+	CIL0946S0091
scaffold72237	2413959	2413988	30	strongHypo	-0.325	6.28e-13	Intron (CIL0946S0121.mRNA/CIL0946S0121, intron 2 of 4)	2411746	2424105	12360	+	CIL0946S0121
scaffold72348	19731	19737	7	strongHyper	0.35	2.07e-07	Distal Intergenic	181902	183961	2060	-	CIL0948S0005
scaffold72348	65107	65130	24	strongHyper	0.393	4.27e-06	Distal Intergenic	181902	183961	2060	-	CIL0948S0005
scaffold72348	115845	115862	18	strongHyper	0.313	8.93e-09	Distal Intergenic	181902	183961	2060	-	CIL0948S0005
scaffold72348	226721	226850	130	strongHyper	0.317	1.98e-05	Promoter (1-2kb)	228509	234173	5665	+	CIL0948S0010
scaffold72348	453242	453252	11	strongHyper	0.334	1.2e-06	Distal Intergenic	460746	501577	40832	+	CIL0948S0021
scaffold72348	482724	482756	33	strongHypo	-0.328	4.29e-07	Intron (CIL0948S0021.mRNA/CIL0948S0021, intron 1 of 19)	460746	501577	40832	+	CIL0948S0021
scaffold72348	957241	957249	9	strongHyper	0.277	3.64e-08	Distal Intergenic	946260	951174	4915	-	CIL0948S0049
scaffold72348	1096583	1096634	52	strongHyper	0.368	3.07e-09	Distal Intergenic	1099715	1102421	2707	-	CIL0948S0058
scaffold72348	1154237	1154429	193	strongHypo	-0.362	1.13e-13	Distal Intergenic	1150704	1151384	681	+	CIL0948S0065
scaffold72348	1352209	1352220	12	strongHypo	-0.307	0.000154	Intron (CIL0948S0092.mRNA/CIL0948S0092, intron 5 of 6)	1347770	1353197	5428	-	CIL0948S0092
scaffold72348	1445300	1445416	117	strongHypo	-0.207	0.000776	Intron (CIL0948S0108.mRNA/CIL0948S0108, intron 4 of 9)	1444353	1448231	3879	+	CIL0948S0108
scaffold72348	1576411	1576419	9	strongHypo	-0.347	1.82e-06	Promoter (<=1kb)	1574343	1575466	1124	-	CIL0948S0132
scaffold72348	1649680	1649689	10	strongHypo	-0.368	3.27e-06	Distal Intergenic	1651328	1653552	2225	-	CIL0948S0144
scaffold72348	1739294	1739315	22	strongHyper	0.39	1.08e-13	Distal Intergenic	1753346	1754872	1527	+	CIL0948S0149
scaffold72348	2358572	2358591	20	strongHyper	0.28	3.5e-06	Exon (CIL0948S0219.mRNA/CIL0948S0219, exon 1 of 2)	2357906	2361419	3514	+	CIL0948S0219
scaffold72348	2506759	2507025	267	strongHyper	0.25	7.96e-20	Promoter (1-2kb)	2508282	2508710	429	+	CIL0948S0237
scaffold72348	2513033	2513050	18	strongHypo	-0.376	1.96e-10	Distal Intergenic	2508993	2511750	2758	+	CIL0948S0238
scaffold72459	88112	88169	58	strongHypo	-0.36	7.32e-15	Distal Intergenic	88401	94752	6352	-	CIL0951S0009
scaffold72459	221713	221758	46	strongHypo	-0.248	0.000153	Distal Intergenic	169416	170647	1232	+	CIL0951S0019
scaffold72459	228331	228392	62	strongHypo	-0.369	1.18e-08	Distal Intergenic	169416	170647	1232	+	CIL0951S0019
scaffold72459	246352	246361	10	strongHypo	-0.434	3.93e-09	Distal Intergenic	288422	296912	8491	-	CIL0951S0023
scaffold72459	954846	954899	54	strongHypo	-0.268	1.95e-08	Distal Intergenic	957419	958288	870	-	CIL0951S0069
scaffold72459	1089282	1089313	32	strongHyper	0.377	3.41e-11	Promoter (1-2kb)	1082357	1087959	5603	-	CIL0951S0082
scaffold72459	1222444	1222593	150	strongHypo	-0.259	1.24e-05	Promoter (<=1kb)	1214650	1221770	7121	-	CIL0951S0089
scaffold72459	1443158	1443175	18	strongHyper	0.256	6.05e-07	Distal Intergenic	1474600	1496597	21998	+	CIL0951S0098
scaffold72459	2551409	2551439	31	strongHyper	0.329	7.76e-12	Distal Intergenic	2578604	2584350	5747	+	CIL0951S0165
scaffold72459	2644100	2644104	5	strongHyper	0.287	1.42e-07	Distal Intergenic	2578604	2584350	5747	+	CIL0951S0165
scaffold72459	2925242	2925247	6	strongHyper	0.324	8.2e-08	Distal Intergenic	2846312	2848952	2641	-	CIL0951S0173
scaffold72459	2930420	2930435	16	strongHyper	0.328	5.97e-11	Distal Intergenic	2846312	2848952	2641	-	CIL0951S0173
scaffold72459	3151097	3151141	45	strongHypo	-0.334	3.21e-16	Distal Intergenic	3118617	3121159	2543	-	CIL0951S0179
scaffold72571	6826	6833	8	strongHypo	-0.273	3.36e-05	Promoter (1-2kb)	2400	5281	2882	-	CIL0953S0001
scaffold72571	46137	46295	159	strongHypo	-0.224	0.000257	Distal Intergenic	58207	61625	3419	+	CIL0953S0003
scaffold72571	523338	523509	172	strongHyper	0.223	6.79e-07	Intron (CIL0953S0032.mRNA/CIL0953S0032, intron 5 of 8)	518286	526799	8514	+	CIL0953S0032
scaffold72571	577517	577563	47	strongHypo	-0.222	6.8e-05	Distal Intergenic	580892	584257	3366	+	CIL0953S0036
scaffold72571	707023	707122	100	strongHyper	0.201	6.6e-08	Distal Intergenic	724965	726093	1129	-	CIL0953S0044
scaffold72571	995425	995437	13	strongHypo	-0.224	1.94e-06	Promoter (<=1kb)	992881	994895	2015	-	CIL0953S0058
scaffold72571	1151572	1151586	15	strongHypo	-0.241	8.18e-08	Distal Intergenic	1143066	1143594	529	-	CIL0953S0066
scaffold72571	1826852	1826861	10	strongHyper	0.4	9.95e-13	Distal Intergenic	1830040	1830361	322	-	CIL0953S0088
scaffold72571	2008411	2008680	270	strongHyper	0.247	2.24e-09	Distal Intergenic	2008953	2012420	3468	-	CIL0953S0093
scaffold72571	2243578	2243597	20	strongHypo	-0.272	3.12e-08	Distal Intergenic	2238064	2238270	207	+	CIL0953S0111
scaffold72571	2371788	2371891	104	strongHyper	0.286	4.64e-06	Distal Intergenic	2379562	2396966	17405	+	CIL0953S0116
scaffold72682	322675	322758	84	strongHypo	-0.201	1.41e-05	Promoter (<=1kb)	323143	328391	5249	+	CIL0957S0006
scaffold72682	432042	432139	98	strongHypo	-0.212	0.000185	Distal Intergenic	432634	447916	15283	-	CIL0957S0011
scaffold72682	448076	448098	23	strongHypo	-0.362	7.84e-06	Promoter (<=1kb)	432634	447916	15283	-	CIL0957S0011
scaffold72682	462144	462176	33	strongHyper	0.385	9.52e-09	Distal Intergenic	469188	479113	9926	+	CIL0957S0012
scaffold72682	543392	543453	62	strongHypo	-0.245	3.99e-06	Exon (CIL0957S0019.mRNA/CIL0957S0019, exon 2 of 2)	543198	552563	9366	-	CIL0957S0019
scaffold72682	663621	663723	103	strongHypo	-0.216	0.000834	Exon (CIL0957S0028.mRNA/CIL0957S0028, exon 6 of 8)	661409	667503	6095	-	CIL0957S0028
scaffold72682	787932	788066	135	strongHypo	-0.21	1.13e-06	Exon (CIL0957S0044.mRNA/CIL0957S0044, exon 1 of 2)	784480	789729	5250	-	CIL0957S0044
scaffold72682	801828	801949	122	strongHyper	0.287	6.02e-10	Distal Intergenic	803898	804825	928	-	CIL0957S0048
scaffold72682	832660	832676	17	strongHypo	-0.236	4.36e-06	Distal Intergenic	826998	828334	1337	-	CIL0957S0051
scaffold72682	920350	920428	79	strongHyper	0.256	1.06e-08	Distal Intergenic	921917	925493	3577	-	CIL0957S0066
scaffold72682	1417193	1417199	7	strongHypo	-0.362	1.09e-12	Promoter (1-2kb)	1418731	1423888	5158	+	CIL0957S0096
scaffold72682	1615137	1615145	9	strongHyper	0.281	3.43e-10	Promoter (2-3kb)	1608711	1612775	4065	-	CIL0957S0113
scaffold72682	1660185	1660225	41	strongHypo	-0.216	2.64e-06	Distal Intergenic	1663240	1667327	4088	+	CIL0957S0118
scaffold72682	1894672	1894679	8	strongHyper	0.311	2.34e-09	Promoter (1-2kb)	1896144	1900205	4062	+	CIL0957S0134
scaffold72682	2010657	2010663	7	strongHyper	0.359	0.000358	Promoter (2-3kb)	2006869	2007898	1030	-	CIL0957S0141
scaffold72682	2264980	2265078	99	strongHyper	0.323	5.82e-13	Distal Intergenic	2318482	2319793	1312	+	CIL0957S0156
scaffold72682	2374803	2374946	144	strongHyper	0.236	4.37e-08	Intron (CIL0957S0161.mRNA/CIL0957S0161, intron 2 of 4)	2373452	2376496	3045	-	CIL0957S0161
scaffold72682	2403614	2404067	454	strongHyper	0.215	1.55e-17	Exon (CIL0957S0166.mRNA/CIL0957S0166, exon 3 of 4)	2401054	2405091	4038	+	CIL0957S0166
scaffold72682	2467878	2467885	8	strongHypo	-0.289	2.61e-05	Intron (CIL0957S0177.mRNA/CIL0957S0177, intron 2 of 9)	2460860	2465730	4871	+	CIL0957S0176
scaffold73459	7373	7377	5	strongHyper	0.379	1.5e-11	Distal Intergenic	11011	14439	3429	-	CIL0962S0001
scaffold73459	85256	85284	29	strongHypo	-0.265	1.54e-10	Intron (CIL0962S0005.mRNA/CIL0962S0005, intron 2 of 2)	83534	91733	8200	+	CIL0962S0005
scaffold73459	597837	597844	8	strongHypo	-0.388	6.96e-16	Promoter (2-3kb)	600625	603041	2417	+	CIL0962S0027
scaffold73459	605115	605140	26	strongHypo	-0.289	2.12e-08	Distal Intergenic	600625	603041	2417	+	CIL0962S0027
scaffold73459	616125	616144	20	strongHypo	-0.204	0.00315	Distal Intergenic	600625	603041	2417	+	CIL0962S0027
scaffold73459	1781503	1781534	32	strongHyper	0.36	6.67e-08	Promoter (<=1kb)	1780020	1780808	789	-	CIL0962S0119
scaffold73459	2075556	2075706	151	strongHypo	-0.208	7.61e-09	Distal Intergenic	2099462	2100718	1257	-	CIL0962S0139
scaffold73459	2169573	2169637	65	strongHyper	0.373	3.04e-06	Distal Intergenic	2148919	2149191	273	+	CIL0962S0144
scaffold73459	2323205	2323376	172	strongHyper	0.226	2.85e-05	Exon (CIL0962S0150.mRNA/CIL0962S0150, exon 1 of 1)	2323053	2323205	153	+	CIL0962S0150
scaffold73459	2372873	2372986	114	strongHypo	-0.225	3.1e-08	Exon (CIL0962S0152.mRNA/CIL0962S0152, exon 1 of 1)	2372556	2373333	778	-	CIL0962S0152
scaffold73459	2411397	2411504	108	strongHyper	0.332	7.46e-24	Distal Intergenic	2415532	2423207	7676	-	CIL0962S0159
scaffold73459	2455349	2455388	40	strongHypo	-0.259	0.000751	Distal Intergenic	2464895	2466162	1268	-	CIL0962S0163
scaffold73570	30182	30230	49	strongHyper	0.207	1.13e-06	Distal Intergenic	22115	28044	5930	+	CIL0967S0004
scaffold73570	404410	404427	18	strongHypo	-0.215	4.39e-05	Promoter (<=1kb)	405046	411172	6127	+	CIL0967S0041
scaffold73570	472044	472107	64	strongHypo	-0.354	4.73e-26	Distal Intergenic	472611	473240	630	-	CIL0967S0050
scaffold73570	551028	551143	116	strongHyper	0.275	2.57e-09	Distal Intergenic	543325	544981	1657	+	CIL0967S0062
scaffold73570	602646	602660	15	strongHyper	0.279	5.75e-06	3' UTR	593969	596759	2791	-	CIL0967S0067
scaffold73570	1095346	1095402	57	strongHypo	-0.328	1.64e-11	Promoter (2-3kb)	1091955	1093189	1235	-	CIL0967S0099
scaffold73570	1332147	1332177	31	strongHypo	-0.263	1.25e-11	Distal Intergenic	1332979	1338971	5993	-	CIL0967S0118
scaffold73570	1925008	1925031	24	strongHypo	-0.286	2.69e-07	Promoter (2-3kb)	1927139	1929587	2449	+	CIL0967S0169
scaffold73570	1958174	1958483	310	strongHypo	-0.212	1.24e-08	Exon (CIL0967S0176.mRNA/CIL0967S0176, exon 4 of 10)	1957010	1965824	8815	+	CIL0967S0176
scaffold73570	2065882	2065941	60	strongHypo	-0.245	6.77e-14	Distal Intergenic	2061740	2062310	571	-	CIL0967S0191
scaffold73570	2117797	2117919	123	strongHyper	0.213	1.74e-06	Promoter (1-2kb)	2119194	2121020	1827	+	CIL0967S0199
scaffold73570	2146445	2146498	54	strongHypo	-0.398	2.53e-07	Exon (CIL0967S0203.mRNA/CIL0967S0203, exon 3 of 3)	2145444	2147199	1756	+	CIL0967S0203
scaffold73570	2231517	2231592	76	strongHyper	0.255	4.1e-08	Promoter (2-3kb)	2233717	2240155	6439	+	CIL0967S0209
scaffold73570	2293547	2293556	10	strongHyper	0.307	2.15e-07	Promoter (<=1kb)	2292146	2293045	900	-	CIL0967S0215
scaffold73570	2403403	2403443	41	strongHypo	-0.226	1.32e-06	Distal Intergenic	2397406	2400270	2865	-	CIL0967S0228
scaffold73570	2480255	2480345	91	strongHyper	0.273	3.69e-09	Promoter (<=1kb)	2477161	2479711	2551	-	CIL0967S0236
scaffold73570	2491034	2491119	86	strongHyper	0.284	3.85e-06	Distal Intergenic	2477161	2479711	2551	-	CIL0967S0236
scaffold73682	46274	46401	128	strongHyper	0.252	8.67e-05	Distal Intergenic	36236	36973	738	-	CIL0970S0002
scaffold73682	476677	476741	65	strongHypo	-0.348	1.54e-07	Promoter (2-3kb)	472568	473781	1214	-	CIL0970S0042
scaffold73682	890782	890820	39	strongHypo	-0.275	6.46e-05	Distal Intergenic	892696	896558	3863	-	CIL0970S0064
scaffold73682	934937	935259	323	strongHypo	-0.375	1.36e-10	Promoter (1-2kb)	936539	938810	2272	+	CIL0970S0067
scaffold73682	1001750	1001783	34	strongHyper	0.389	5.16e-05	Distal Intergenic	1010122	1018517	8396	-	CIL0970S0070
scaffold73682	1022365	1022398	34	strongHypo	-0.243	7.55e-07	Distal Intergenic	1025933	1030720	4788	+	CIL0970S0071
scaffold73682	1272194	1272290	97	strongHypo	-0.263	9.06e-19	Distal Intergenic	1270025	1271690	1666	+	CIL0970S0098
scaffold73682	1371033	1371260	228	strongHypo	-0.2	1.83e-10	Promoter (<=1kb)	1371868	1381357	9490	+	CIL0970S0106
scaffold73682	1466414	1466445	32	strongHyper	0.326	4.61e-14	Intron (CIL0970S0122.mRNA/CIL0970S0122, intron 1 of 1)	1464590	1467976	3387	-	CIL0970S0122
scaffold73682	1633385	1633673	289	strongHypo	-0.285	1.73e-05	Promoter (2-3kb)	1629465	1631194	1730	-	CIL0970S0131
scaffold73682	1781295	1781366	72	strongHypo	-0.407	2.63e-06	Promoter (2-3kb)	1784056	1785242	1187	+	CIL0970S0141
scaffold73682	1909060	1909074	15	strongHypo	-0.335	4.07e-07	Promoter (1-2kb)	1899205	1907766	8562	-	CIL0970S0156
scaffold73682	1963538	1963546	9	strongHyper	0.453	1.08e-08	5' UTR	1962997	1965416	2420	+	CIL0970S0162
scaffold73793	32527	32624	98	strongHyper	0.203	9.57e-05	Distal Intergenic	12736	16569	3834	+	CIL0972S0002
scaffold73793	510112	510191	80	strongHypo	-0.254	5.21e-05	Exon (CIL0972S0028.mRNA/CIL0972S0028, exon 7 of 7)	506003	510386	4384	+	CIL0972S0028
scaffold73793	1326175	1326217	43	strongHyper	0.201	2.93e-05	Distal Intergenic	1316019	1318011	1993	+	CIL0972S0077
scaffold73793	1671330	1671340	11	strongHypo	-0.369	2.06e-10	3' UTR	1668207	1671651	3445	+	CIL0972S0093
scaffold73793	1687130	1687140	11	strongHyper	0.324	6.28e-05	Distal Intergenic	1683197	1683854	658	-	CIL0972S0095
scaffold73793	1923239	1923260	22	strongHypo	-0.386	8.29e-08	Distal Intergenic	1905293	1906507	1215	-	CIL0972S0109
scaffold73793	2288037	2288119	83	strongHypo	-0.235	1.06e-06	Distal Intergenic	2275395	2275760	366	-	CIL0972S0137
scaffold73793	2321635	2321718	84	strongHyper	0.205	5.15e-07	5' UTR	2319677	2324604	4928	+	CIL0972S0142
scaffold73904	94298	94380	83	strongHyper	0.23	1.2e-10	Distal Intergenic	70813	71622	810	+	CIL0974S0001
scaffold73904	365331	365402	72	strongHypo	-0.282	4.74e-11	Distal Intergenic	291458	304396	12939	-	CIL0974S0008
scaffold73904	410143	410184	42	strongHypo	-0.277	9.31e-06	Distal Intergenic	291458	304396	12939	-	CIL0974S0008
scaffold73904	546492	546595	104	strongHyper	0.214	8.42e-11	Intron (CIL0974S0021.mRNA/CIL0974S0021, intron 2 of 6)	528754	533666	4913	-	CIL0974S0020
scaffold73904	587637	587668	32	strongHyper	0.356	1.57e-13	Distal Intergenic	576940	577973	1034	+	CIL0974S0022
scaffold73904	868761	868915	155	strongHypo	-0.232	5.66e-07	Promoter (1-2kb)	870157	870595	439	+	CIL0974S0045
scaffold73904	989306	989341	36	strongHypo	-0.238	0.00254	Distal Intergenic	1006799	1010810	4012	+	CIL0974S0056
scaffold73904	1397107	1397116	10	strongHyper	0.346	3.38e-08	Distal Intergenic	1399025	1400058	1034	-	CIL0974S0069
scaffold73904	1570034	1570039	6	strongHypo	-0.274	5.48e-11	Distal Intergenic	1559486	1569160	9675	+	CIL0974S0078
scaffold73904	1775283	1775354	72	strongHyper	0.22	2.61e-06	Distal Intergenic	1755479	1773708	18230	+	CIL0974S0085
scaffold73904	1927832	1927952	121	strongHypo	-0.255	4.28e-05	Distal Intergenic	1933986	1939380	5395	+	CIL0974S0088
scaffold73904	2138635	2138751	117	strongHypo	-0.272	2.38e-08	Distal Intergenic	2152732	2153407	676	-	CIL0974S0099
scaffold74015	475585	475590	6	strongHyper	0.382	5.06e-15	Distal Intergenic	478628	484720	6093	+	CIL0976S0021
scaffold74015	730049	730115	67	strongHyper	0.203	0.00085	Distal Intergenic	754148	754850	703	+	CIL0976S0038
scaffold74015	825642	825750	109	strongHyper	0.231	1.29e-05	Distal Intergenic	846554	854998	8445	+	CIL0976S0041
scaffold74015	826352	826431	80	strongHyper	0.302	2.25e-08	Distal Intergenic	846554	854998	8445	+	CIL0976S0041
scaffold74015	1312996	1313029	34	strongHyper	0.284	0.000187	Promoter (<=1kb)	1311123	1312682	1560	-	CIL0976S0059
scaffold74015	1353942	1354070	129	strongHyper	0.228	3.28e-07	Distal Intergenic	1357803	1362534	4732	+	CIL0976S0065
scaffold74015	1373277	1373318	42	strongHyper	0.369	5.52e-09	Distal Intergenic	1374326	1380000	5675	-	CIL0976S0068
scaffold74015	1418347	1418378	32	strongHyper	0.37	1.08e-11	Distal Intergenic	1419060	1420465	1406	-	CIL0976S0072
scaffold74015	1650633	1650641	9	strongHyper	0.347	1.49e-05	Exon (CIL0976S0101.mRNA/CIL0976S0101, exon 10 of 19)	1647095	1654334	7240	+	CIL0976S0101
scaffold74015	1718021	1718041	21	strongHyper	0.354	1.61e-08	Promoter (<=1kb)	1718596	1725468	6873	+	CIL0976S0111
scaffold74015	1989437	1989494	58	strongHypo	-0.293	5e-06	Distal Intergenic	1982809	1986540	3732	+	CIL0976S0141
scaffold74126	136368	136493	126	strongHypo	-0.209	2.51e-08	Distal Intergenic	136804	137503	700	-	CIL0978S0019
scaffold74126	1009923	1009942	20	strongHypo	-0.374	1.86e-05	Exon (CIL0978S0102.mRNA/CIL0978S0102, exon 4 of 11)	1008203	1013275	5073	+	CIL0978S0102
scaffold74126	1040771	1041046	276	strongHyper	0.213	1.53e-12	Exon (CIL0978S0105.mRNA/CIL0978S0105, exon 2 of 6)	1031643	1042371	10729	-	CIL0978S0105
scaffold74126	1514843	1515058	216	strongHyper	0.245	3.01e-09	Distal Intergenic	1451671	1511899	60229	-	CIL0978S0138
scaffold74126	1579728	1580038	311	strongHyper	0.232	3.58e-10	Distal Intergenic	1573594	1575567	1974	-	CIL0978S0143
scaffold74126	1592540	1592547	8	strongHypo	-0.258	6.33e-06	Promoter (<=1kb)	1590327	1592216	1890	-	CIL0978S0145
scaffold74126	1768945	1769199	255	strongHyper	0.218	0.00124	Exon (CIL0978S0162.mRNA/CIL0978S0162, exon 1 of 1)	1767898	1770287	2390	-	CIL0978S0162
scaffold74126	2284725	2284753	29	strongHyper	0.27	2.25e-07	Distal Intergenic	2213132	2222278	9147	-	CIL0978S0183
scaffold74126	2383313	2383512	200	strongHypo	-0.244	2.6e-06	Exon (CIL0978S0185.mRNA/CIL0978S0185, exon 19 of 20)	2361739	2384697	22959	+	CIL0978S0185
scaffold74237	75332	75392	61	strongHyper	0.253	0.000587	Distal Intergenic	88786	97743	8958	+	CIL0979S0004
scaffold74237	107726	107759	34	strongHyper	0.346	3.92e-13	Promoter (2-3kb)	104339	105442	1104	-	CIL0979S0005
scaffold74237	687318	687353	36	strongHyper	0.214	4.28e-09	Promoter (2-3kb)	673951	684600	10650	-	CIL0979S0034
scaffold74237	873136	873146	11	strongHyper	0.26	7.32e-11	Distal Intergenic	914600	915412	813	-	CIL0979S0052
scaffold74237	987303	987734	432	strongHypo	-0.211	2.09e-09	Promoter (<=1kb)	981976	986816	4841	-	CIL0979S0060
scaffold74237	1009242	1009303	62	strongHypo	-0.314	1.41e-07	Promoter (<=1kb)	1002833	1009051	6219	-	CIL0979S0064
scaffold74237	1164921	1164997	77	strongHypo	-0.262	0.000562	Promoter (<=1kb)	1164162	1164422	261	-	CIL0979S0086
scaffold74237	1200983	1200991	9	strongHypo	-0.339	1.71e-05	Promoter (1-2kb)	1197548	1199155	1608	-	CIL0979S0091
scaffold74237	1460610	1460686	77	strongHyper	0.366	8.53e-05	Exon (CIL0979S0104.mRNA/CIL0979S0104, exon 6 of 6)	1460165	1465781	5617	-	CIL0979S0104
scaffold74237	1566518	1566763	246	strongHypo	-0.31	2.44e-16	Distal Intergenic	1566881	1568748	1868	-	CIL0979S0116
scaffold74237	1708623	1708664	42	strongHyper	0.269	1.91e-08	Promoter (<=1kb)	1709463	1711674	2212	+	CIL0979S0126
scaffold74237	1859949	1860083	135	strongHypo	-0.274	0.000156	Distal Intergenic	1875077	1877095	2019	-	CIL0979S0135
scaffold74237	2136259	2136311	53	strongHyper	0.209	0.000107	Distal Intergenic	2146738	2148432	1695	+	CIL0979S0158
scaffold74237	2398723	2398832	110	strongHypo	-0.236	6.34e-11	Promoter (1-2kb)	2396786	2397173	388	-	CIL0979S0176
scaffold74348	25143	25151	9	strongHypo	-0.225	2e-06	Distal Intergenic	20897	24526	3630	+	CIL0982S0002
scaffold74348	81737	81762	26	strongHyper	0.332	9.59e-11	Distal Intergenic	76027	80848	4822	+	CIL0982S0007
scaffold74348	198018	198029	12	strongHyper	0.292	7.61e-06	Distal Intergenic	195755	197803	2049	+	CIL0982S0016
scaffold74348	246606	246639	34	strongHyper	0.325	5.56e-14	Distal Intergenic	249053	250822	1770	-	CIL0982S0020
scaffold74348	262111	262179	69	strongHyper	0.255	2.22e-05	Distal Intergenic	265440	268217	2778	-	CIL0982S0021
scaffold74348	353303	353328	26	strongHypo	-0.331	3.07e-06	Promoter (2-3kb)	347432	350787	3356	-	CIL0982S0029
scaffold74348	626305	626338	34	strongHyper	0.243	2.03e-07	Promoter (2-3kb)	628587	630391	1805	+	CIL0982S0049
scaffold74348	677101	677397	297	strongHypo	-0.422	1.23e-11	Distal Intergenic	691984	695145	3162	+	CIL0982S0051
scaffold74348	972325	972486	162	strongHyper	0.278	0.000205	Intron (CIL0982S0061.mRNA/CIL0982S0061, intron 1 of 1)	970110	973074	2965	+	CIL0982S0061
scaffold74348	980990	981127	138	strongHypo	-0.204	3.44e-06	Distal Intergenic	970110	973074	2965	+	CIL0982S0061
scaffold74348	1179734	1179788	55	strongHypo	-0.302	4.4e-09	Distal Intergenic	1177551	1178199	649	+	CIL0982S0069
scaffold74348	1379834	1379932	99	strongHypo	-0.387	5e-21	Distal Intergenic	1381224	1383825	2602	-	CIL0982S0082
scaffold74348	1384961	1384977	17	strongHypo	-0.383	1.66e-15	Promoter (1-2kb)	1381224	1383825	2602	-	CIL0982S0082
scaffold74348	1675276	1675530	255	strongHypo	-0.25	6.41e-08	Distal Intergenic	1666948	1672425	5478	+	CIL0982S0103
scaffold74348	1749407	1749455	49	strongHypo	-0.211	1.01e-05	Distal Intergenic	1745587	1746912	1326	+	CIL0982S0111
scaffold74348	1892736	1892754	19	strongHyper	0.273	2.5e-09	Distal Intergenic	1881973	1888927	6955	+	CIL0982S0122
scaffold74348	2129630	2129644	15	strongHypo	-0.225	0.000701	Promoter (<=1kb)	2130062	2131558	1497	+	CIL0982S0132
scaffold74348	2230359	2230431	73	strongHyper	0.223	5.13e-06	Distal Intergenic	2235516	2241312	5797	+	CIL0982S0149
scaffold74459	356541	356674	134	strongHypo	-0.261	8.33e-15	Distal Intergenic	372703	377994	5292	+	CIL0984S0017
scaffold74459	389600	389620	21	strongHyper	0.258	4.04e-05	Intron (CIL0984S0019.mRNA/CIL0984S0019, intron 2 of 2)	384077	390379	6303	+	CIL0984S0019
scaffold74459	913193	913223	31	strongHypo	-0.239	3.5e-06	Distal Intergenic	902792	906703	3912	-	CIL0984S0053
scaffold74459	1359790	1359901	112	strongHyper	0.226	1.37e-05	Distal Intergenic	1362991	1367636	4646	+	CIL0984S0092
scaffold74459	1739425	1739581	157	strongHypo	-0.315	9.3e-08	Distal Intergenic	1716671	1738997	22327	+	CIL0984S0102
scaffold74459	1824210	1824352	143	strongHypo	-0.328	1.64e-07	Distal Intergenic	1825037	1829653	4617	-	CIL0984S0105
scaffold74459	1887953	1888204	252	strongHyper	0.301	8.33e-10	Distal Intergenic	1872135	1874850	2716	+	CIL0984S0110
scaffold74459	1970323	1970331	9	strongHypo	-0.333	5.54e-08	Promoter (<=1kb)	1971036	1972924	1889	+	CIL0984S0117
scaffold74459	2201900	2201992	93	strongHypo	-0.226	0.00922	Distal Intergenic	2159759	2170512	10754	-	CIL0984S0128
scaffold74570	287384	287391	8	strongHypo	-0.386	4.8e-08	Promoter (<=1kb)	275829	286835	11007	-	CIL0987S0031
scaffold74570	291390	291576	187	strongHypo	-0.294	2.88e-05	Exon (CIL0987S0033.mRNA/CIL0987S0033, exon 1 of 2)	291155	292187	1033	+	CIL0987S0033
scaffold74570	521277	521290	14	strongHypo	-0.369	1.25e-10	Promoter (1-2kb)	514699	519990	5292	-	CIL0987S0061
scaffold74570	772776	772811	36	strongHyper	0.414	2.69e-08	Promoter (1-2kb)	774181	787498	13318	+	CIL0987S0093
scaffold74570	783938	783986	49	strongHyper	0.215	7.51e-07	Intron (CIL0987S0093.mRNA/CIL0987S0093, intron 9 of 10)	774181	787498	13318	+	CIL0987S0093
scaffold74570	1034826	1035082	257	strongHypo	-0.256	3.89e-07	Distal Intergenic	1048665	1051815	3151	+	CIL0987S0116
scaffold74570	1218552	1218746	195	strongHypo	-0.301	4.18e-12	Intron (CIL0987S0139.mRNA/CIL0987S0139, intron 2 of 4)	1217862	1220226	2365	+	CIL0987S0139
scaffold74570	1651746	1651822	77	strongHypo	-0.215	0.00012	Distal Intergenic	1611800	1612236	437	-	CIL0987S0169
scaffold74570	1878604	1878691	88	strongHyper	0.212	1.9e-05	Exon (CIL0987S0179.mRNA/CIL0987S0179, exon 2 of 2)	1878618	1881574	2957	-	CIL0987S0179
scaffold74681	355402	355415	14	strongHypo	-0.3	5.37e-15	Distal Intergenic	333497	337760	4264	-	CIL0989S0011
scaffold74681	496248	496367	120	strongHyper	0.357	5.26e-07	Distal Intergenic	507668	520763	13096	-	CIL0989S0015
scaffold74681	723607	723683	77	strongHyper	0.203	7.66e-05	Distal Intergenic	689323	689523	201	+	CIL0989S0037
scaffold74681	946064	946146	83	strongHypo	-0.26	1.47e-15	Distal Intergenic	952086	988449	36364	-	CIL0989S0048
scaffold74681	946660	946736	77	strongHypo	-0.411	9.15e-20	Distal Intergenic	952086	988449	36364	-	CIL0989S0048
scaffold74681	1269746	1269830	85	strongHypo	-0.362	1.67e-11	Promoter (<=1kb)	1268455	1269391	937	-	CIL0989S0054
scaffold74681	1925539	1925599	61	strongHyper	0.321	1.67e-05	Distal Intergenic	1870093	1871934	1842	+	CIL0989S0093
scaffold74681	2017130	2017154	25	strongHyper	0.249	3.36e-06	Distal Intergenic	1990336	1990641	306	-	CIL0989S0100
scaffold74793	52937	52987	51	strongHyper	0.276	2.88e-06	Distal Intergenic	43042	43777	736	-	CIL0990S0004
scaffold74793	99999	100110	112	strongHypo	-0.218	0.00145	Distal Intergenic	92483	93249	767	+	CIL0990S0006
scaffold74793	312080	312166	87	strongHypo	-0.351	0.000156	Distal Intergenic	312471	314564	2094	-	CIL0990S0016
scaffold74793	402467	402699	233	strongHypo	-0.245	0.000102	Distal Intergenic	401505	402011	507	+	CIL0990S0021
scaffold74793	854876	854936	61	strongHyper	0.203	2.27e-05	Distal Intergenic	866281	868165	1885	+	CIL0990S0047
scaffold74793	2256502	2256652	151	strongHyper	0.257	2.25e-07	Exon (CIL0990S0183.mRNA/CIL0990S0183, exon 1 of 1)	2256469	2256771	303	+	CIL0990S0183
scaffold74904	27309	27795	487	strongHypo	-0.215	5.55e-22	Promoter (1-2kb)	28650	48646	19997	+	CIL0992S0002
scaffold74904	124724	124743	20	strongHyper	0.266	1.56e-06	Promoter (<=1kb)	121778	124384	2607	-	CIL0992S0010
scaffold74904	130944	131193	250	strongHypo	-0.336	1.21e-08	Intron (CIL0992S0012.mRNA/CIL0992S0012, intron 2 of 3)	129135	132101	2967	-	CIL0992S0012
scaffold74904	133277	133285	9	strongHypo	-0.327	2.12e-05	Promoter (1-2kb)	129135	132101	2967	-	CIL0992S0012
scaffold74904	356907	356980	74	strongHypo	-0.344	9.43e-09	Distal Intergenic	357381	359963	2583	-	CIL0992S0023
scaffold75015	50856	50920	65	strongHyper	0.399	9.85e-09	Distal Intergenic	33604	39211	5608	-	CIL0993S0003
scaffold75015	563891	563905	15	strongHyper	0.285	1.17e-07	Distal Intergenic	567065	572629	5565	+	CIL0993S0026
scaffold75015	1053356	1053668	313	strongHypo	-0.346	1.34e-16	Promoter (2-3kb)	1032420	1050717	18298	-	CIL0993S0051
scaffold75126	33169	33267	99	strongHypo	-0.305	4.94e-06	Distal Intergenic	25581	26338	758	+	CIL0996S0003
scaffold75126	87323	87399	77	strongHypo	-0.303	1.61e-14	Distal Intergenic	84944	86854	1911	+	CIL0996S0007
scaffold75126	131784	131792	9	strongHypo	-0.281	2.86e-06	Promoter (2-3kb)	134501	135515	1015	+	CIL0996S0009
scaffold75126	659509	659723	215	strongHypo	-0.202	2.11e-05	Distal Intergenic	666525	680689	14165	+	CIL0996S0040
scaffold75126	1344796	1344813	18	strongHyper	0.31	7.67e-11	Distal Intergenic	1284299	1292377	8079	+	CIL0996S0087
scaffold75126	1385041	1385071	31	strongHyper	0.363	1.38e-19	Distal Intergenic	1284299	1292377	8079	+	CIL0996S0087
scaffold75237	206322	206347	26	strongHyper	0.286	0.000103	Promoter (2-3kb)	208968	210755	1788	+	CIL0998S0007
scaffold75237	529494	529538	45	strongHyper	0.271	4.31e-08	Promoter (<=1kb)	530124	534109	3986	+	CIL0998S0027
scaffold75237	670373	670599	227	strongHypo	-0.266	5.35e-06	Distal Intergenic	637709	668261	30553	+	CIL0998S0033
scaffold75237	1184569	1184618	50	strongHypo	-0.329	3.4e-06	Distal Intergenic	1175276	1180188	4913	-	CIL0998S0060
scaffold75237	1246035	1246042	8	strongHypo	-0.331	8.22e-06	Exon (CIL0998S0063.mRNA/CIL0998S0063, exon 1 of 1)	1243978	1247493	3516	+	CIL0998S0063
scaffold75237	1591072	1591287	216	strongHypo	-0.216	3.15e-09	Distal Intergenic	1592866	1596452	3587	-	CIL0998S0083
scaffold75237	1665391	1665429	39	strongHyper	0.228	0.000268	Promoter (<=1kb)	1664617	1664886	270	-	CIL0998S0089
scaffold75237	1841128	1841143	16	strongHyper	0.289	0.00115	Distal Intergenic	1830506	1834658	4153	+	CIL0998S0104
scaffold75237	1997575	1997589	15	strongHyper	0.289	8.21e-05	Distal Intergenic	2009056	2010368	1313	-	CIL0998S0110
scaffold75237	2239281	2239365	85	strongHypo	-0.232	5.78e-09	Exon (CIL0998S0116.mRNA/CIL0998S0116, exon 8 of 8)	2235202	2239823	4622	+	CIL0998S0116
scaffold75348	549524	549552	29	strongHyper	0.348	2.43e-13	Distal Intergenic	528885	543175	14291	-	CIL1001S0035
scaffold75348	608204	608601	398	strongHyper	0.278	1.89e-10	Distal Intergenic	603261	607842	4582	+	CIL1001S0039
scaffold75348	737639	737833	195	strongHypo	-0.248	6.47e-07	Intron (CIL1001S0045.mRNA/CIL1001S0045, intron 4 of 6)	733130	738643	5514	-	CIL1001S0045
scaffold75348	1395433	1395490	58	strongHyper	0.317	3.02e-06	Distal Intergenic	1324614	1326848	2235	-	CIL1001S0070
scaffold75348	1612077	1612105	29	strongHypo	-0.297	7.09e-06	Promoter (<=1kb)	1610401	1611342	942	-	CIL1001S0074
scaffold75348	1690641	1691002	362	strongHyper	0.203	1.67e-06	Intron (CIL1001S0078.mRNA/CIL1001S0078, intron 6 of 11)	1687186	1696056	8871	-	CIL1001S0078
scaffold75348	1732933	1732976	44	strongHypo	-0.298	7.88e-13	Distal Intergenic	1726238	1728555	2318	-	CIL1001S0081
scaffold75570	316209	316216	8	strongHyper	0.202	0.000323	Distal Intergenic	314881	315575	695	+	CIL1002S0023
scaffold75570	568595	568670	76	strongHypo	-0.253	9.72e-05	Promoter (1-2kb)	570061	582911	12851	+	CIL1002S0042
scaffold75570	732000	732009	10	strongHypo	-0.274	1.28e-09	Intron (CIL1002S0049.mRNA/CIL1002S0049, intron 2 of 9)	730317	734907	4591	-	CIL1002S0049
scaffold75570	888864	888880	17	strongHyper	0.296	4.07e-06	Distal Intergenic	824529	825456	928	+	CIL1002S0056
scaffold75570	889994	890010	17	strongHyper	0.314	1.15e-08	Distal Intergenic	824529	825456	928	+	CIL1002S0056
scaffold75570	903478	903695	218	strongHyper	0.279	3.18e-13	Distal Intergenic	824529	825456	928	+	CIL1002S0056
scaffold75570	1202712	1202841	130	strongHypo	-0.239	3.27e-09	Distal Intergenic	1208253	1240883	32631	+	CIL1002S0076
scaffold75570	1636926	1636955	30	strongHypo	-0.244	9.44e-18	Promoter (<=1kb)	1637906	1640574	2669	+	CIL1002S0096
scaffold75570	1859954	1859978	25	strongHypo	-0.248	1.64e-05	Distal Intergenic	1862956	1863590	635	-	CIL1002S0105
scaffold75570	1977600	1977685	86	strongHyper	0.445	7.43e-17	Promoter (2-3kb)	1980497	1987987	7491	+	CIL1002S0113
scaffold75570	2068235	2068239	5	strongHyper	0.237	1.39e-06	Distal Intergenic	2026659	2033844	7186	-	CIL1002S0118
scaffold75681	308404	308509	106	strongHyper	0.234	3.02e-12	Distal Intergenic	309593	311322	1730	-	CIL1003S0034
scaffold75681	432547	432576	30	strongHyper	0.355	1.53e-16	Distal Intergenic	466633	469914	3282	-	CIL1003S0047
scaffold75681	615196	615321	126	strongHyper	0.312	1.12e-05	Exon (CIL1003S0062.mRNA/CIL1003S0062, exon 6 of 8)	612629	620469	7841	+	CIL1003S0062
scaffold75681	646468	646516	49	strongHypo	-0.32	4.6e-09	Promoter (2-3kb)	648786	651892	3107	+	CIL1003S0064
scaffold75681	884962	884971	10	strongHypo	-0.272	9.09e-05	Exon (CIL1003S0081.mRNA/CIL1003S0081, exon 2 of 4)	884267	885589	1323	-	CIL1003S0081
scaffold75681	1423354	1423439	86	strongHypo	-0.263	0.00223	Distal Intergenic	1441684	1445920	4237	-	CIL1003S0105
scaffold75681	1516194	1516229	36	strongHyper	0.232	1.78e-06	Distal Intergenic	1519704	1524275	4572	-	CIL1003S0111
scaffold75681	2066571	2066601	31	strongHyper	0.234	5.6e-10	Distal Intergenic	2032273	2041959	9687	-	CIL1003S0130
scaffold75681	2375458	2375734	277	strongHypo	-0.209	1.63e-06	Promoter (2-3kb)	2365904	2373197	7294	-	CIL1003S0147
scaffold75904	416492	416563	72	strongHypo	-0.401	4.72e-06	Intron (CIL1006S0016.mRNA/CIL1006S0016, intron 2 of 8)	415211	423846	8636	-	CIL1006S0016
scaffold75904	483844	483851	8	strongHypo	-0.262	0.000193	Distal Intergenic	471735	476366	4632	-	CIL1006S0019
scaffold75904	1692524	1692532	9	strongHyper	0.706	4.33e-25	Promoter (1-2kb)	1689746	1690963	1218	-	CIL1006S0091
scaffold75904	1801543	1801576	34	strongHypo	-0.263	3.77e-05	Exon (CIL1006S0103.mRNA/CIL1006S0103, exon 5 of 5)	1799891	1801837	1947	+	CIL1006S0103
scaffold75904	1931956	1931966	11	strongHypo	-0.245	4.47e-05	Distal Intergenic	1914954	1922252	7299	-	CIL1006S0111
scaffold75904	1941212	1941243	32	strongHyper	0.229	3.03e-09	Distal Intergenic	1914954	1922252	7299	-	CIL1006S0111
scaffold76348	235577	235582	6	strongHypo	-0.233	1.81e-07	Distal Intergenic	241949	247054	5106	+	CIL1009S0031
scaffold76348	286832	286886	55	strongHypo	-0.235	2.01e-06	Distal Intergenic	270183	275614	5432	-	CIL1009S0034
scaffold76348	567912	568197	286	strongHyper	0.282	7.84e-09	Distal Intergenic	516209	532484	16276	+	CIL1009S0049
scaffold76348	952716	952732	17	strongHypo	-0.237	8.71e-05	Distal Intergenic	948042	949578	1537	+	CIL1009S0081
scaffold76348	1364247	1364410	164	strongHypo	-0.213	1.23e-05	Distal Intergenic	1357839	1360860	3022	-	CIL1009S0109
scaffold76348	1414717	1414749	33	strongHypo	-0.232	3.52e-06	Exon (CIL1009S0112.mRNA/CIL1009S0112, exon 1 of 1)	1414474	1416315	1842	+	CIL1009S0112
scaffold76348	1603771	1603780	10	strongHypo	-0.248	2.27e-06	Distal Intergenic	1603848	1604383	536	-	CIL1009S0121
scaffold76348	1770314	1770471	158	strongHypo	-0.374	1.81e-07	Distal Intergenic	1838573	1856097	17525	+	CIL1009S0124
scaffold76348	1954064	1954169	106	strongHypo	-0.377	3.65e-13	Distal Intergenic	1949621	1952554	2934	+	CIL1009S0129
scaffold76348	2196231	2196260	30	strongHyper	0.362	1.51e-19	Distal Intergenic	2091231	2100816	9586	-	CIL1009S0134
scaffold76459	21629	21640	12	strongHypo	-0.326	6.19e-06	Distal Intergenic	21873	23535	1663	-	CIL1012S0003
scaffold76459	339286	339396	111	strongHyper	0.262	1.99e-05	Intron (CIL1012S0029.mRNA/CIL1012S0029, intron 4 of 7)	327504	347094	19591	-	CIL1012S0029
scaffold76459	365854	365877	24	strongHyper	0.297	5.28e-08	Promoter (2-3kb)	361161	363156	1996	-	CIL1012S0030
scaffold76459	647006	647139	134	strongHyper	0.304	0.000715	Exon (CIL1012S0053.mRNA/CIL1012S0053, exon 3 of 5)	644363	650334	5972	-	CIL1012S0053
scaffold76459	840924	840987	64	strongHyper	0.29	4.03e-11	Promoter (<=1kb)	841540	853088	11549	+	CIL1012S0069
scaffold76459	1194277	1194631	355	strongHyper	0.214	1.78e-05	Distal Intergenic	1191703	1193735	2033	+	CIL1012S0087
scaffold76459	1197557	1197604	48	strongHyper	0.213	4.62e-06	Distal Intergenic	1191703	1193735	2033	+	CIL1012S0087
scaffold76459	1336743	1336771	29	strongHyper	0.628	7.45e-14	Promoter (1-2kb)	1331698	1335509	3812	-	CIL1012S0097
scaffold76459	1359001	1359157	157	strongHyper	0.233	2.59e-10	Promoter (<=1kb)	1359519	1364842	5324	+	CIL1012S0101
scaffold76459	1383016	1383058	43	strongHyper	0.327	4.4e-16	Distal Intergenic	1368366	1375134	6769	-	CIL1012S0102
scaffold76459	1412804	1412885	82	strongHyper	0.246	6.04e-08	Promoter (1-2kb)	1414481	1414885	405	+	CIL1012S0106
scaffold76570	423605	423864	260	strongHypo	-0.284	2.11e-05	Distal Intergenic	427549	429354	1806	+	CIL1015S0031
scaffold76570	430707	430820	114	strongHypo	-0.227	3.36e-05	Exon (CIL1015S0032.mRNA/CIL1015S0032, exon 12 of 12)	427549	429354	1806	+	CIL1015S0031
scaffold76570	650788	650952	165	strongHypo	-0.229	1.4e-09	Promoter (1-2kb)	652771	659599	6829	+	CIL1015S0042
scaffold76570	659622	659724	103	strongHypo	-0.295	1.13e-08	Distal Intergenic	652771	659599	6829	+	CIL1015S0042
scaffold76570	660220	660230	11	strongHypo	-0.285	2.49e-09	Distal Intergenic	652771	659599	6829	+	CIL1015S0042
scaffold76570	899841	899848	8	strongHyper	0.226	0.000167	Distal Intergenic	891079	895367	4289	-	CIL1015S0059
scaffold76570	962280	962318	39	strongHyper	0.239	9.68e-07	Distal Intergenic	973264	981738	8475	+	CIL1015S0061
scaffold76570	1257732	1257877	146	strongHypo	-0.209	2.8e-08	Distal Intergenic	1254949	1255701	753	+	CIL1015S0081
scaffold76570	1380905	1380931	27	strongHyper	0.214	1.7e-05	Distal Intergenic	1379870	1380392	523	+	CIL1015S0090
scaffold76570	1830442	1830546	105	strongHypo	-0.24	3.56e-05	Intron (CIL1015S0116.mRNA/CIL1015S0116, intron 3 of 5)	1827313	1840648	13336	+	CIL1015S0116
scaffold76681	44407	44494	88	strongHypo	-0.355	1.42e-14	Promoter (1-2kb)	36418	42948	6531	-	CIL1018S0005
scaffold76681	141793	141851	59	strongHypo	-0.235	7.49e-06	Promoter (1-2kb)	136483	140235	3753	-	CIL1018S0016
scaffold76681	490861	490896	36	strongHypo	-0.377	7.81e-07	Distal Intergenic	488254	490185	1932	+	CIL1018S0031
scaffold76681	901808	901857	50	strongHypo	-0.328	1.05e-09	Intron (CIL1018S0048.mRNA/CIL1018S0048, intron 4 of 4)	894830	906990	12161	+	CIL1018S0048
scaffold76681	1115958	1115973	16	strongHypo	-0.382	1.92e-13	Intron (CIL1018S0063.mRNA/CIL1018S0063, intron 2 of 5)	1113451	1119549	6099	+	CIL1018S0063
scaffold76681	1219591	1219653	63	strongHypo	-0.255	3.88e-08	Distal Intergenic	1222873	1223834	962	+	CIL1018S0070
scaffold76681	1322752	1322769	18	strongHyper	0.332	3.19e-06	Distal Intergenic	1330908	1331773	866	+	CIL1018S0077
scaffold76681	1822566	1822574	9	strongHyper	0.412	3.34e-06	Promoter (<=1kb)	1808050	1822114	14065	-	CIL1018S0118
scaffold76792	318349	318365	17	strongHypo	-0.254	7.38e-06	Intron (CIL1020S0033.mRNA/CIL1020S0033, intron 2 of 4)	316951	320077	3127	-	CIL1020S0033
scaffold76792	407789	407863	75	strongHypo	-0.247	9.59e-17	Distal Intergenic	398570	401137	2568	+	CIL1020S0046
scaffold76792	422362	422385	24	strongHypo	-0.287	3.09e-07	Distal Intergenic	428619	429545	927	+	CIL1020S0048
scaffold76792	690367	690409	43	strongHypo	-0.284	9.1e-08	Distal Intergenic	704976	707176	2201	-	CIL1020S0081
scaffold76792	872050	872094	45	strongHyper	0.3	0.000134	Promoter (<=1kb)	867831	871877	4047	-	CIL1020S0091
scaffold76903	81528	81594	67	strongHypo	-0.376	5.7e-12	Distal Intergenic	58309	59699	1391	-	CIL1021S0005
scaffold76903	145849	145916	68	strongHypo	-0.447	3.01e-09	Distal Intergenic	146428	147909	1482	-	CIL1021S0010
scaffold76903	430425	430444	20	strongHyper	0.221	2.17e-07	Intron (CIL1021S0021.mRNA/CIL1021S0021, intron 3 of 3)	428232	430947	2716	+	CIL1021S0021
scaffold76903	667283	667337	55	strongHyper	0.257	1.81e-05	Distal Intergenic	639649	653031	13383	-	CIL1021S0029
scaffold76903	672566	672594	29	strongHyper	0.354	4.74e-08	Distal Intergenic	639649	653031	13383	-	CIL1021S0029
scaffold76903	1186798	1187077	280	strongHyper	0.202	7.92e-06	Distal Intergenic	1191210	1192982	1773	+	CIL1021S0065
scaffold76903	1189320	1189375	56	strongHypo	-0.432	6.96e-12	Promoter (1-2kb)	1191210	1192982	1773	+	CIL1021S0065
scaffold76903	1292273	1292320	48	strongHyper	0.224	0.000847	Promoter (2-3kb)	1294993	1295474	482	+	CIL1021S0075
scaffold76903	1483022	1483134	113	strongHypo	-0.213	7.99e-07	Promoter (1-2kb)	1476532	1481575	5044	-	CIL1021S0106
scaffold77015	526076	526134	59	strongHypo	-0.208	6.97e-08	Distal Intergenic	508237	522550	14314	-	CIL1023S0023
scaffold77015	527908	527956	49	strongHyper	0.216	3.42e-05	Distal Intergenic	508237	522550	14314	-	CIL1023S0023
scaffold77015	545170	545191	22	strongHypo	-0.335	7.4e-09	Promoter (1-2kb)	546817	552381	5565	+	CIL1023S0025
scaffold77015	1059118	1059128	11	strongHypo	-0.334	5.07e-07	Promoter (1-2kb)	1052018	1057439	5422	-	CIL1023S0054
scaffold77015	1148547	1148558	12	strongHypo	-0.355	2.18e-08	Promoter (1-2kb)	1150197	1157214	7018	+	CIL1023S0057
scaffold77015	1159580	1159613	34	strongHyper	0.205	4.3e-05	Exon (CIL1023S0058.mRNA/CIL1023S0058, exon 1 of 3)	1159361	1163716	4356	+	CIL1023S0058
scaffold77015	1288702	1288741	40	strongHyper	0.322	1.53e-06	Promoter (<=1kb)	1288724	1292814	4091	+	CIL1023S0063
scaffold77015	1443657	1443680	24	strongHyper	0.202	3.16e-07	Promoter (<=1kb)	1439693	1443319	3627	-	CIL1023S0075
scaffold77015	1483746	1483756	11	strongHyper	0.28	1.39e-07	Promoter (<=1kb)	1479873	1483261	3389	-	CIL1023S0082
scaffold77126	84390	84463	74	strongHyper	0.226	0.000114	Exon (CIL1025S0004.mRNA/CIL1025S0004, exon 1 of 17)	77606	84541	6936	-	CIL1025S0004
scaffold77126	343807	343849	43	strongHypo	-0.228	0.000193	Exon (CIL1025S0012.mRNA/CIL1025S0012, exon 12 of 16)	336212	340304	4093	+	CIL1025S0011
scaffold77126	682964	683094	131	strongHypo	-0.204	2.32e-10	Promoter (<=1kb)	683297	684197	901	+	CIL1025S0022
scaffold77126	685258	685448	191	strongHyper	0.253	9.59e-11	Intron (CIL1025S0023.mRNA/CIL1025S0023, intron 1 of 2)	684266	687476	3211	+	CIL1025S0023
scaffold77126	1025463	1025490	28	strongHyper	0.301	6.89e-07	Promoter (1-2kb)	1026751	1032740	5990	+	CIL1025S0051
scaffold77126	2028668	2028693	26	strongHypo	-0.206	5e-06	Distal Intergenic	2018506	2022202	3697	-	CIL1025S0156
scaffold77237	44017	44069	53	strongHyper	0.263	1.07e-05	Distal Intergenic	63281	65001	1721	+	CIL1028S0003
scaffold77237	411662	411672	11	strongHyper	0.478	5.26e-11	Intron (CIL1028S0026.mRNA/CIL1028S0026, intron 1 of 1)	410263	412988	2726	-	CIL1028S0026
scaffold77237	730147	730192	46	strongHyper	0.29	6.68e-05	Distal Intergenic	626284	627741	1458	+	CIL1028S0037
scaffold77237	1148144	1148207	64	strongHypo	-0.22	0.000294	Distal Intergenic	1114802	1141627	26826	-	CIL1028S0057
scaffold77237	1373479	1373522	44	strongHyper	0.26	1.41e-06	Promoter (2-3kb)	1367541	1371285	3745	-	CIL1028S0068
scaffold77348	34995	35106	112	strongHyper	0.391	2.8e-05	Distal Intergenic	38007	40606	2600	-	CIL1029S0004
scaffold77348	80443	80557	115	strongHyper	0.223	2.41e-06	Distal Intergenic	83610	83936	327	-	CIL1029S0011
scaffold77348	137531	137639	109	strongHypo	-0.211	0.0178	Promoter (1-2kb)	130401	136363	5963	-	CIL1029S0015
scaffold77348	169605	169698	94	strongHyper	0.281	2.47e-07	Distal Intergenic	169876	171480	1605	-	CIL1029S0019
scaffold77348	601548	601683	136	strongHypo	-0.236	0.000663	Distal Intergenic	678528	679219	692	-	CIL1029S0058
scaffold77348	792896	792922	27	strongHypo	-0.221	4.95e-05	Distal Intergenic	761528	763583	2056	+	CIL1029S0062
scaffold77348	793341	793534	194	strongHyper	0.281	2.43e-05	Distal Intergenic	761528	763583	2056	+	CIL1029S0062
scaffold77348	1166705	1166726	22	strongHypo	-0.395	1.41e-19	Distal Intergenic	1093180	1098464	5285	+	CIL1029S0076
scaffold77348	1167422	1167636	215	strongHypo	-0.284	2.32e-05	Distal Intergenic	1093180	1098464	5285	+	CIL1029S0076
scaffold77459	377792	377802	11	strongHypo	-0.247	7.01e-06	Promoter (1-2kb)	370636	375812	5177	-	CIL1030S0032
scaffold77459	557177	557187	11	strongHyper	0.215	1.96e-07	Intron (CIL1030S0061.mRNA/CIL1030S0061, intron 2 of 7)	554785	567358	12574	-	CIL1030S0061
scaffold77459	1423085	1423167	83	strongHypo	-0.238	5.28e-13	Distal Intergenic	1449845	1473288	23444	+	CIL1030S0108
scaffold77459	1428441	1428496	56	strongHypo	-0.205	1.32e-06	Distal Intergenic	1449845	1473288	23444	+	CIL1030S0108
scaffold77570	177110	177116	7	strongHypo	-0.239	7.79e-10	Distal Intergenic	175906	176405	500	+	CIL1031S0024
scaffold77570	385754	385789	36	strongHyper	0.201	1.98e-08	Distal Intergenic	384490	385245	756	+	CIL1031S0049
scaffold77570	397940	398122	183	strongHypo	-0.33	8.25e-06	Exon (CIL1031S0050.mRNA/CIL1031S0050, exon 3 of 3)	395972	398829	2858	+	CIL1031S0050
scaffold77570	701404	701429	26	strongHypo	-0.252	4.46e-06	Distal Intergenic	759010	763919	4910	-	CIL1031S0077
scaffold77570	906051	906302	252	strongHyper	0.211	0.00171	Distal Intergenic	911983	913524	1542	+	CIL1031S0087
scaffold77570	937832	937894	63	strongHyper	0.317	6.73e-15	Distal Intergenic	934255	935853	1599	+	CIL1031S0089
scaffold77570	1161199	1161350	152	strongHypo	-0.228	0.000887	Distal Intergenic	1153796	1157199	3404	-	CIL1031S0111
scaffold77570	1317986	1318192	207	strongHypo	-0.219	8.88e-06	Exon (CIL1031S0132.mRNA/CIL1031S0132, exon 18 of 19)	1313687	1316422	2736	+	CIL1031S0131
scaffold77570	1474629	1474642	14	strongHypo	-0.214	2.12e-05	Exon (CIL1031S0153.mRNA/CIL1031S0153, exon 2 of 7)	1473114	1478548	5435	+	CIL1031S0153
scaffold77570	1477845	1478002	158	strongHypo	-0.245	1.19e-05	3' UTR	1479125	1481363	2239	-	CIL1031S0154
scaffold77681	51250	51261	12	strongHypo	-0.223	5.48e-07	Promoter (1-2kb)	40038	49487	9450	-	CIL1032S0004
scaffold77681	62538	62619	82	strongHyper	0.261	1.34e-05	Promoter (<=1kb)	63241	68234	4994	+	CIL1032S0005
scaffold77681	833499	833545	47	strongHypo	-0.244	0.000378	Distal Intergenic	828254	829254	1001	+	CIL1032S0059
scaffold77681	839409	839450	42	strongHypo	-0.215	0.000121	Distal Intergenic	828254	829254	1001	+	CIL1032S0059
scaffold77681	1438435	1438441	7	strongHypo	-0.308	1.14e-09	Intron (CIL1032S0123.mRNA/CIL1032S0123, intron 3 of 5)	1437430	1441040	3611	+	CIL1032S0123
scaffold77681	1474761	1474824	64	strongHyper	0.312	1.46e-10	Distal Intergenic	1475795	1477785	1991	-	CIL1032S0126
scaffold77681	1601938	1601972	35	strongHyper	0.323	2.35e-08	Promoter (2-3kb)	1604721	1605519	799	+	CIL1032S0138
scaffold77792	278512	278518	7	strongHypo	-0.385	2.11e-08	Promoter (1-2kb)	276118	277148	1031	-	CIL1034S0008
scaffold77792	391884	391911	28	strongHypo	-0.391	8.98e-08	Distal Intergenic	326910	354277	27368	-	CIL1034S0014
scaffold77792	929711	929734	24	strongHyper	0.3	7.77e-06	Promoter (<=1kb)	925331	929217	3887	-	CIL1034S0046
scaffold77792	1451007	1451095	89	strongHypo	-0.229	0.00041	Intron (CIL1034S0085.mRNA/CIL1034S0085, intron 1 of 2)	1449897	1451784	1888	-	CIL1034S0085
scaffold77792	1472856	1472932	77	strongHyper	0.214	0.00076	Intron (CIL1034S0086.mRNA/CIL1034S0086, intron 5 of 5)	1476581	1477056	476	+	CIL1034S0087
scaffold78348	204515	204554	40	strongHypo	-0.262	7.66e-09	Promoter (<=1kb)	194638	204049	9412	-	CIL1037S0007
scaffold78348	547292	547327	36	strongHypo	-0.399	8.94e-11	Promoter (1-2kb)	549083	552381	3299	+	CIL1037S0028
scaffold78792	13748	13807	60	strongHypo	-0.28	3.25e-07	Distal Intergenic	23868	25126	1259	+	CIL1038S0001
scaffold78792	245643	245648	6	strongHyper	0.371	1.82e-07	Promoter (1-2kb)	239355	244209	4855	-	CIL1038S0024
scaffold78792	301930	301944	15	strongHyper	0.317	5.17e-05	Promoter (<=1kb)	302673	307682	5010	+	CIL1038S0029
scaffold78792	304375	304478	104	strongHyper	0.255	1.07e-06	Exon (CIL1038S0029.mRNA/CIL1038S0029, exon 5 of 10)	302673	307682	5010	+	CIL1038S0029
scaffold78792	879801	879873	73	strongHyper	0.263	1.03e-08	Distal Intergenic	884421	889364	4944	+	CIL1038S0098
scaffold78792	1396539	1396596	58	strongHyper	0.643	1.45e-19	Distal Intergenic	1385360	1387488	2129	-	CIL1038S0128
scaffold78792	1587846	1588030	185	strongHyper	0.237	3.52e-06	Distal Intergenic	1592948	1597186	4239	+	CIL1038S0137
scaffold78792	1588718	1588800	83	strongHypo	-0.313	1.48e-06	Distal Intergenic	1592948	1597186	4239	+	CIL1038S0137
scaffold78792	1654459	1654531	73	strongHypo	-0.227	0.000855	Distal Intergenic	1611081	1613147	2067	-	CIL1038S0138
scaffold78792	1655000	1655044	45	strongHypo	-0.224	0.00507	Distal Intergenic	1611081	1613147	2067	-	CIL1038S0138
scaffold78903	7386	7396	11	strongHyper	0.26	2.06e-06	Promoter (2-3kb)	9525	25041	15517	+	CIL1040S0001
scaffold78903	302779	302816	38	strongHypo	-0.386	3.35e-08	Distal Intergenic	275312	281010	5699	-	CIL1040S0017
scaffold78903	381688	381696	9	strongHypo	-0.249	3.12e-08	Promoter (2-3kb)	376904	378832	1929	-	CIL1040S0020
scaffold78903	400309	400331	23	strongHyper	0.226	3.19e-11	Distal Intergenic	376904	378832	1929	-	CIL1040S0020
scaffold78903	1296691	1296783	93	strongHypo	-0.227	2.4e-05	Distal Intergenic	1301109	1307563	6455	+	CIL1040S0062
scaffold78903	1502894	1503009	116	strongHyper	0.256	2.07e-06	Distal Intergenic	1491199	1492134	936	-	CIL1040S0065
scaffold78903	1646400	1646414	15	strongHyper	0.328	1.99e-07	Distal Intergenic	1698025	1700906	2882	+	CIL1040S0073
scaffold78903	1701224	1701273	50	strongHyper	0.401	2.12e-08	Distal Intergenic	1698025	1700906	2882	+	CIL1040S0073
scaffold78903	1766643	1766831	189	strongHyper	0.206	7.09e-07	Promoter (<=1kb)	1763747	1766296	2550	-	CIL1040S0079
scaffold78903	1902128	1902195	68	strongHypo	-0.309	5.25e-07	Distal Intergenic	1891599	1895215	3617	-	CIL1040S0085
scaffold78903	1945627	1945781	155	strongHypo	-0.222	4.11e-06	Distal Intergenic	1950251	1954638	4388	+	CIL1040S0088
scaffold79014	272646	272715	70	strongHyper	0.267	3.24e-07	Distal Intergenic	252815	256558	3744	+	CIL1043S0010
scaffold79014	361196	361231	36	strongHypo	-0.305	7.92e-14	Distal Intergenic	284352	333205	48854	-	CIL1043S0014
scaffold79014	797313	797329	17	strongHyper	0.235	1.03e-06	Distal Intergenic	808765	814387	5623	-	CIL1043S0027
scaffold79014	1760811	1760978	168	strongHyper	0.213	7.27e-06	Distal Intergenic	1782079	1785810	3732	+	CIL1043S0078
scaffold79014	1823685	1823804	120	strongHyper	0.336	9.86e-12	Distal Intergenic	1825604	1827702	2099	-	CIL1043S0082
scaffold79681	615346	615429	84	strongHyper	0.217	2.04e-09	Distal Intergenic	600912	608480	7569	+	CIL1047S0022
scaffold79681	672489	672522	34	strongHyper	0.23	0.000138	Intron (CIL1047S0029.mRNA/CIL1047S0029, intron 25 of 30)	683870	685364	1495	+	CIL1047S0030
scaffold79681	917358	917647	290	strongHyper	0.243	3.98e-10	Distal Intergenic	920506	924969	4464	-	CIL1047S0059
scaffold79681	919526	919554	29	strongHypo	-0.343	1.16e-07	Distal Intergenic	920506	924969	4464	-	CIL1047S0059
scaffold79681	1328594	1328708	115	strongHyper	0.295	1.72e-10	Distal Intergenic	1324799	1327096	2298	+	CIL1047S0097
scaffold79681	1348428	1348442	15	strongHyper	0.397	1.51e-12	Promoter (2-3kb)	1350803	1355813	5011	+	CIL1047S0099
scaffold79681	1548267	1548341	75	strongHyper	0.505	6.45e-14	Distal Intergenic	1549769	1555956	6188	-	CIL1047S0121
scaffold79681	1789384	1789522	139	strongHyper	0.25	1.33e-11	Distal Intergenic	1793210	1797331	4122	+	CIL1047S0145
scaffold79792	37312	37324	13	strongHyper	0.341	1.59e-09	Distal Intergenic	30569	35367	4799	+	CIL1048S0003
scaffold79792	229025	229112	88	strongHyper	0.239	3.96e-08	Distal Intergenic	222123	225016	2894	-	CIL1048S0022
scaffold79792	281127	281189	63	strongHypo	-0.244	4.68e-07	Distal Intergenic	288641	291815	3175	+	CIL1048S0024
scaffold79792	398129	398146	18	strongHypo	-0.407	2.09e-07	Intron (CIL1048S0033.mRNA/CIL1048S0033, intron 7 of 9)	391004	409956	18953	-	CIL1048S0033
scaffold79792	413171	413230	60	strongHypo	-0.265	6.2e-13	Distal Intergenic	391004	409956	18953	-	CIL1048S0033
scaffold79903	242551	242700	150	strongHypo	-0.325	1.63e-06	Distal Intergenic	269743	271892	2150	+	CIL1050S0010
scaffold79903	556520	556529	10	strongHyper	0.272	2.44e-06	Promoter (2-3kb)	547724	554160	6437	-	CIL1050S0030
scaffold79903	589686	589722	37	strongHypo	-0.276	9.63e-08	Distal Intergenic	580876	582204	1329	-	CIL1050S0033
scaffold79903	851748	851752	5	strongHypo	-0.34	4.33e-08	Distal Intergenic	858795	859824	1030	+	CIL1050S0052
scaffold79903	859408	859470	63	strongHyper	0.398	3.24e-06	Intron (CIL1050S0052.mRNA/CIL1050S0052, intron 2 of 2)	858795	859824	1030	+	CIL1050S0052
scaffold79903	867305	867329	25	strongHyper	0.206	0.000135	Distal Intergenic	862119	867034	4916	+	CIL1050S0053
scaffold79903	1527919	1527977	59	strongHypo	-0.202	0.000132	Distal Intergenic	1510528	1513105	2578	-	CIL1050S0084
scaffold80014	39934	39947	14	strongHyper	0.346	8.36e-06	Exon (CIL1051S0004.mRNA/CIL1051S0004, exon 1 of 2)	39837	40506	670	+	CIL1051S0004
scaffold80014	203354	203421	68	strongHyper	0.29	1.14e-06	Promoter (1-2kb)	204485	206249	1765	+	CIL1051S0017
scaffold80014	270741	270771	31	strongHypo	-0.379	1.02e-13	Distal Intergenic	270855	271490	636	-	CIL1051S0023
scaffold80014	400347	400363	17	strongHyper	0.253	4.38e-07	Promoter (1-2kb)	393464	398538	5075	-	CIL1051S0036
scaffold80014	485458	485578	121	strongHyper	0.204	2.01e-06	Distal Intergenic	466264	478755	12492	-	CIL1051S0042
scaffold80014	506525	506631	107	strongHypo	-0.213	0.000148	3' UTR	506296	513513	7218	-	CIL1051S0045
scaffold80014	919641	919763	123	strongHypo	-0.21	7.29e-07	Distal Intergenic	914319	917827	3509	+	CIL1051S0050
scaffold80014	969377	969394	18	strongHyper	0.202	6.39e-09	Distal Intergenic	997961	1020579	22619	+	CIL1051S0053
scaffold80014	1370349	1370422	74	strongHypo	-0.257	1.32e-07	Distal Intergenic	1384205	1386144	1940	+	CIL1051S0068
scaffold80014	1390296	1390346	51	strongHypo	-0.476	2.34e-11	Distal Intergenic	1395610	1399274	3665	+	CIL1051S0069
scaffold80349	101130	101170	41	strongHypo	-0.522	3.33e-13	Promoter (2-3kb)	91951	98931	6981	-	CIL1055S0014
scaffold80349	274948	274954	7	strongHyper	0.335	1.34e-07	Distal Intergenic	281181	286207	5027	+	CIL1055S0038
scaffold80349	361795	361974	180	strongHypo	-0.256	8.71e-10	Distal Intergenic	362919	364537	1619	-	CIL1055S0045
scaffold80349	437884	437965	82	strongHyper	0.262	7.69e-05	Distal Intergenic	425323	433182	7860	-	CIL1055S0051
scaffold80349	474501	474541	41	strongHypo	-0.319	1.78e-07	Promoter (2-3kb)	471368	471793	426	-	CIL1055S0055
scaffold80349	637282	637354	73	strongHypo	-0.33	2.35e-05	Distal Intergenic	652366	657860	5495	+	CIL1055S0070
scaffold80349	867503	867509	7	strongHyper	0.402	5.47e-10	Distal Intergenic	873608	875260	1653	-	CIL1055S0089
scaffold80349	1014195	1014277	83	strongHyper	0.363	1.22e-05	Intron (CIL1055S0098.mRNA/CIL1055S0098, intron 5 of 5)	1008775	1015187	6413	-	CIL1055S0098
scaffold80349	1105543	1105780	238	strongHypo	-0.269	8.76e-07	Distal Intergenic	1089854	1097259	7406	-	CIL1055S0107
scaffold80349	1250171	1250304	134	strongHyper	0.212	8.6e-24	Promoter (2-3kb)	1232811	1248142	15332	-	CIL1055S0115
scaffold80682	97494	97551	58	strongHypo	-0.316	2.5e-11	Intron (CIL1060S0014.mRNA/CIL1060S0014, intron 1 of 5)	92308	93383	1076	+	CIL1060S0013
scaffold80682	166011	166053	43	strongHypo	-0.359	3.88e-09	Distal Intergenic	162012	163718	1707	+	CIL1060S0017
scaffold80682	346609	346629	21	strongHyper	0.277	4.28e-09	Promoter (1-2kb)	336906	345188	8283	-	CIL1060S0031
scaffold80682	688357	688364	8	strongHyper	0.297	3.82e-08	Distal Intergenic	692266	693355	1090	+	CIL1060S0049
scaffold80682	827759	827942	184	strongHyper	0.251	1.51e-06	Distal Intergenic	823768	826426	2659	+	CIL1060S0061
scaffold80682	856442	856476	35	strongHypo	-0.308	1.25e-06	Exon (CIL1060S0064.mRNA/CIL1060S0064, exon 5 of 8)	853947	859047	5101	+	CIL1060S0064
scaffold80682	993689	993733	45	strongHyper	0.472	6.06e-12	Distal Intergenic	1002743	1008010	5268	+	CIL1060S0076
scaffold80682	1090042	1090241	200	strongHyper	0.218	0.00315	Exon (CIL1060S0082.mRNA/CIL1060S0082, exon 5 of 5)	1089279	1095571	6293	-	CIL1060S0082
scaffold80682	1166879	1166899	21	strongHypo	-0.383	1.47e-13	Distal Intergenic	1159336	1161266	1931	-	CIL1060S0091
scaffold80682	1377156	1377165	10	strongHyper	0.262	5.74e-09	Distal Intergenic	1380751	1381733	983	+	CIL1060S0114
scaffold80682	1416637	1416829	193	strongHyper	0.271	3.3e-09	Exon (CIL1060S0117.mRNA/CIL1060S0117, exon 11 of 12)	1416080	1420944	4865	-	CIL1060S0117
scaffold80793	501694	501733	40	strongHyper	0.3	4.52e-13	Distal Intergenic	488731	495667	6937	-	CIL1061S0021
scaffold80793	1032796	1032824	29	strongHypo	-0.317	4.54e-12	Distal Intergenic	1035029	1036027	999	-	CIL1061S0072
scaffold80904	117502	117514	13	strongHypo	-0.261	2.32e-06	Exon (CIL1063S0008.mRNA/CIL1063S0008, exon 4 of 6)	116171	118474	2304	+	CIL1063S0008
scaffold80904	434842	434846	5	strongHyper	0.374	4.42e-10	Distal Intergenic	421537	430893	9357	-	CIL1063S0039
scaffold80904	626394	626401	8	strongHypo	-0.217	6.9e-05	Distal Intergenic	591322	602139	10818	+	CIL1063S0054
scaffold80904	905104	905179	76	strongHypo	-0.448	4.1e-22	Distal Intergenic	754080	767371	13292	+	CIL1063S0056
scaffold80904	985289	985306	18	strongHypo	-0.32	3.32e-09	Distal Intergenic	1088338	1089262	925	+	CIL1063S0064
scaffold80904	987232	987463	232	strongHypo	-0.364	1.35e-09	Distal Intergenic	1088338	1089262	925	+	CIL1063S0064
scaffold80904	1104716	1104895	180	strongHyper	0.218	0.000567	Intron (CIL1063S0068.mRNA/CIL1063S0068, intron 1 of 13)	1104102	1118433	14332	+	CIL1063S0068
scaffold80904	1381671	1381852	182	strongHypo	-0.247	2.26e-08	Distal Intergenic	1384192	1386515	2324	-	CIL1063S0086
scaffold80904	1388157	1388174	18	strongHyper	0.294	3.32e-09	Promoter (1-2kb)	1384192	1386515	2324	-	CIL1063S0086
scaffold81015	43786	44164	379	strongHyper	0.217	7.07e-06	Distal Intergenic	82727	85080	2354	-	CIL1064S0001
scaffold81015	50557	50572	16	strongHypo	-0.393	1.36e-06	Distal Intergenic	82727	85080	2354	-	CIL1064S0001
scaffold81015	276113	276156	44	strongHypo	-0.2	0.000665	Distal Intergenic	272760	276083	3324	+	CIL1064S0016
scaffold81015	882312	882334	23	strongHypo	-0.336	4.18e-06	Promoter (1-2kb)	884057	891007	6951	+	CIL1064S0071
scaffold81015	884838	884904	67	strongHypo	-0.202	0.000141	Intron (CIL1064S0071.mRNA/CIL1064S0071, intron 1 of 5)	884057	891007	6951	+	CIL1064S0071
scaffold81015	951815	951866	52	strongHyper	0.258	5.16e-05	Distal Intergenic	946072	950366	4295	+	CIL1064S0078
scaffold81015	1193183	1193258	76	strongHypo	-0.221	5.82e-06	Promoter (<=1kb)	1188963	1192424	3462	-	CIL1064S0104
scaffold81126	199542	199592	51	strongHypo	-0.277	0.000151	Promoter (2-3kb)	195905	196797	893	-	CIL1066S0007
scaffold81126	452938	452944	7	strongHyper	0.297	0.000163	Promoter (1-2kb)	451418	451783	366	-	CIL1066S0022
scaffold81126	809624	809784	161	strongHyper	0.213	8.65e-07	Exon (CIL1066S0055.mRNA/CIL1066S0055, exon 9 of 9)	805796	810116	4321	+	CIL1066S0055
scaffold81126	949323	949369	47	strongHyper	0.274	1.96e-10	Intron (CIL1066S0075.mRNA/CIL1066S0075, intron 1 of 4)	946313	953852	7540	-	CIL1066S0075
scaffold81126	1038500	1038523	24	strongHyper	0.202	4.25e-05	Distal Intergenic	1037137	1038344	1208	+	CIL1066S0082
scaffold81126	1092897	1092908	12	strongHypo	-0.314	2.85e-08	Distal Intergenic	1087115	1089171	2057	-	CIL1066S0087
scaffold81126	1115215	1115293	79	strongHypo	-0.285	5.99e-08	Distal Intergenic	1087115	1089171	2057	-	CIL1066S0087
scaffold81126	1465182	1465318	137	strongHyper	0.221	0.000109	Distal Intergenic	1475785	1476090	306	-	CIL1066S0102
scaffold81237	23216	23350	135	strongHypo	-0.312	6.58e-11	Distal Intergenic	19712	20017	306	-	CIL1068S0005
scaffold81237	382952	383115	164	strongHyper	0.237	3.34e-07	Promoter (2-3kb)	385575	390029	4455	+	CIL1068S0031
scaffold81237	657019	657036	18	strongHypo	-0.339	8.31e-09	Distal Intergenic	649397	651384	1988	-	CIL1068S0045
scaffold81237	720502	720593	92	strongHypo	-0.328	2.34e-20	Distal Intergenic	724726	728122	3397	+	CIL1068S0049
scaffold81348	18895	19138	244	strongHyper	0.271	5.25e-09	Promoter (1-2kb)	17490	18101	612	-	CIL1071S0003
scaffold81348	114568	114672	105	strongHyper	0.241	1.39e-05	Distal Intergenic	107275	110485	3211	-	CIL1071S0008
scaffold81348	177353	177459	107	strongHyper	0.267	2.29e-16	Promoter (1-2kb)	173838	175768	1931	-	CIL1071S0012
scaffold81348	339540	339665	126	strongHypo	-0.346	2.72e-06	Promoter (<=1kb)	339040	339612	573	-	CIL1071S0029
scaffold81348	372925	372960	36	strongHyper	0.27	8.66e-06	Promoter (<=1kb)	364093	372521	8429	-	CIL1071S0033
scaffold81348	544026	544103	78	strongHypo	-0.324	1.93e-16	Distal Intergenic	512340	515841	3502	+	CIL1071S0048
scaffold81348	900276	900316	41	strongHyper	0.226	9.21e-06	Distal Intergenic	886044	888185	2142	+	CIL1071S0069
scaffold81348	1056013	1056195	183	strongHypo	-0.21	2.91e-07	Promoter (<=1kb)	1056565	1058013	1449	+	CIL1071S0076
scaffold81571	119108	119202	95	strongHypo	-0.237	0.000526	Promoter (<=1kb)	119219	120083	865	+	CIL1075S0006
scaffold81571	640217	640455	239	strongHyper	0.299	4.75e-14	Distal Intergenic	612608	625044	12437	-	CIL1075S0025
scaffold81571	783886	783959	74	strongHyper	0.22	3.15e-05	Promoter (1-2kb)	782030	782290	261	-	CIL1075S0028
scaffold81571	789517	789588	72	strongHyper	0.273	1.59e-05	Distal Intergenic	782030	782290	261	-	CIL1075S0028
scaffold81571	893579	893603	25	strongHyper	0.423	3.58e-14	Distal Intergenic	871622	889764	18143	-	CIL1075S0033
scaffold81571	919268	919276	9	strongHyper	0.369	1.38e-09	Distal Intergenic	920062	922594	2533	-	CIL1075S0035
scaffold81571	1035144	1035176	33	strongHyper	0.21	0.001	Distal Intergenic	1036020	1039465	3446	-	CIL1075S0047
scaffold81571	1080991	1081017	27	strongHyper	0.239	1.84e-05	Promoter (<=1kb)	1053287	1080630	27344	-	CIL1075S0049
scaffold81571	1082058	1082106	49	strongHyper	0.244	1.13e-12	Promoter (1-2kb)	1053287	1080630	27344	-	CIL1075S0049
scaffold81571	1206609	1206675	67	strongHypo	-0.285	4.54e-07	Exon (CIL1075S0059.mRNA/CIL1075S0059, exon 3 of 3)	1204476	1207410	2935	+	CIL1075S0059
scaffold81571	1216438	1216498	61	strongHyper	0.281	1.61e-07	Intron (CIL1075S0060.mRNA/CIL1075S0060, intron 6 of 13)	1212379	1220994	8616	-	CIL1075S0060
scaffold81571	1279041	1279057	17	strongHyper	0.27	1.84e-09	Promoter (<=1kb)	1279860	1281469	1610	+	CIL1075S0065
scaffold81571	1291353	1291364	12	strongHyper	0.3	1.74e-05	Distal Intergenic	1292639	1292878	240	-	CIL1075S0066
scaffold81571	1482193	1482208	16	strongHyper	0.276	1.34e-05	Exon (CIL1075S0084.mRNA/CIL1075S0084, exon 14 of 14)	1483827	1486426	2600	-	CIL1075S0085
scaffold81571	1493374	1493391	18	strongHyper	0.486	7.75e-27	Promoter (<=1kb)	1494281	1505284	11004	+	CIL1075S0086
scaffold81682	580895	581188	294	strongHypo	-0.223	3.56e-07	Distal Intergenic	571546	573555	2010	-	CIL1076S0027
scaffold81682	1121489	1121611	123	strongHypo	-0.253	5.13e-07	Distal Intergenic	1105665	1109634	3970	+	CIL1076S0091
scaffold81682	1150721	1150913	193	strongHyper	0.294	5.25e-06	Distal Intergenic	1105665	1109634	3970	+	CIL1076S0091
scaffold81682	1625468	1625529	62	strongHypo	-0.219	1.6e-05	Distal Intergenic	1604153	1610011	5859	+	CIL1076S0118
scaffold82348	522030	522046	17	strongHyper	0.271	1.6e-10	Distal Intergenic	489993	494202	4210	-	CIL1084S0032
scaffold82348	633913	634038	126	strongHypo	-0.235	9.27e-06	Distal Intergenic	650424	668605	18182	+	CIL1084S0034
scaffold82348	1282289	1282369	81	strongHyper	0.312	1.66e-06	Distal Intergenic	1273162	1277965	4804	-	CIL1084S0082
scaffold82348	1415831	1415911	81	strongHyper	0.326	5.21e-09	Promoter (2-3kb)	1418678	1424198	5521	+	CIL1084S0088
scaffold82348	1591717	1591750	34	strongHyper	0.642	1.92e-13	Distal Intergenic	1592944	1593959	1016	-	CIL1084S0096
scaffold82348	1733416	1733425	10	strongHyper	0.317	9.6e-10	Promoter (1-2kb)	1735141	1736851	1711	+	CIL1084S0099
scaffold82348	1789934	1789966	33	strongHypo	-0.221	0.000348	Distal Intergenic	1785990	1788749	2760	+	CIL1084S0102
scaffold82571	453922	453941	20	strongHyper	0.202	4.43e-07	Distal Intergenic	529084	530549	1466	+	CIL1087S0017
scaffold82571	560802	560828	27	strongHypo	-0.232	1.61e-14	Promoter (<=1kb)	560969	565957	4989	+	CIL1087S0018
scaffold82571	842348	842362	15	strongHypo	-0.471	8.14e-08	Promoter (1-2kb)	838024	841218	3195	-	CIL1087S0047
scaffold82571	1459156	1459296	141	strongHyper	0.24	1.46e-18	Distal Intergenic	1497370	1503937	6568	+	CIL1087S0092
scaffold82682	26739	26765	27	strongHyper	0.231	2.37e-05	Distal Intergenic	135097	140893	5797	+	CIL1089S0003
scaffold82682	72871	72900	30	strongHyper	0.318	1.85e-11	Distal Intergenic	135097	140893	5797	+	CIL1089S0003
scaffold82682	168662	168672	11	strongHypo	-0.314	3.31e-08	Distal Intergenic	135097	140893	5797	+	CIL1089S0003
scaffold82682	393093	393186	94	strongHyper	0.392	2.22e-14	Promoter (1-2kb)	390788	392173	1386	-	CIL1089S0015
scaffold82682	1457339	1457464	126	strongHyper	0.322	9.28e-09	Promoter (1-2kb)	1459257	1461495	2239	+	CIL1089S0066
scaffold82682	1512756	1512774	19	strongHypo	-0.279	0.000154	Distal Intergenic	1544637	1548693	4057	-	CIL1089S0070
scaffold82682	1543291	1543337	47	strongHypo	-0.221	0.000931	Distal Intergenic	1544637	1548693	4057	-	CIL1089S0070
scaffold82682	1758055	1758059	5	strongHyper	0.293	1.12e-05	Distal Intergenic	1790375	1792074	1700	-	CIL1089S0078
scaffold82682	1763735	1763766	32	strongHyper	0.214	1.2e-06	Distal Intergenic	1790375	1792074	1700	-	CIL1089S0078
scaffold82682	1794349	1794543	195	strongHyper	0.283	3.56e-05	Promoter (2-3kb)	1790375	1792074	1700	-	CIL1089S0078
scaffold82682	1825595	1825624	30	strongHyper	0.238	1.18e-08	Intron (CIL1089S0079.mRNA/CIL1089S0079, intron 7 of 9)	1805406	1843469	38064	-	CIL1089S0079
scaffold82793	505042	505087	46	strongHyper	0.244	0.000159	Exon (CIL1090S0034.mRNA/CIL1090S0034, exon 3 of 6)	503588	506893	3306	+	CIL1090S0034
scaffold82793	616421	616458	38	strongHyper	0.21	1.92e-05	Distal Intergenic	607262	611878	4617	-	CIL1090S0045
scaffold82793	771572	771600	29	strongHyper	0.292	6.2e-05	Exon (CIL1090S0056.mRNA/CIL1090S0056, exon 10 of 10)	771012	774585	3574	-	CIL1090S0056
scaffold82793	879914	879955	42	strongHypo	-0.27	0.000105	Distal Intergenic	863565	865363	1799	-	CIL1090S0060
scaffold82793	1426682	1426738	57	strongHypo	-0.26	5.35e-05	Promoter (<=1kb)	1427549	1438107	10559	+	CIL1090S0097
scaffold82904	365919	366018	100	strongHyper	0.342	4.19e-12	Promoter (<=1kb)	366714	367681	968	+	CIL1092S0022
scaffold82904	659396	659464	69	strongHyper	0.289	5.45e-08	Intron (CIL1092S0045.mRNA/CIL1092S0045, intron 7 of 9)	654681	660829	6149	-	CIL1092S0045
scaffold82904	790883	791022	140	strongHypo	-0.204	2.48e-10	Promoter (2-3kb)	778084	788837	10754	-	CIL1092S0061
scaffold82904	863822	863907	86	strongHypo	-0.352	2.42e-07	Promoter (1-2kb)	859403	862050	2648	-	CIL1092S0065
scaffold82904	1185749	1185945	197	strongHyper	0.286	1.98e-09	Distal Intergenic	1160730	1164183	3454	-	CIL1092S0099
scaffold82904	1237289	1237298	10	strongHypo	-0.346	1.98e-09	Distal Intergenic	1233617	1237239	3623	+	CIL1092S0108
scaffold82904	1255061	1255081	21	strongHyper	0.224	2.75e-05	Intron (CIL1092S0110.mRNA/CIL1092S0110, intron 1 of 1)	1253127	1253510	384	+	CIL1092S0109
scaffold82904	1361672	1361677	6	strongHypo	-0.341	1.53e-05	Distal Intergenic	1343092	1350694	7603	-	CIL1092S0114
scaffold83237	239075	239109	35	strongHyper	0.279	1.67e-05	Intron (CIL1093S0029.mRNA/CIL1093S0029, intron 3 of 4)	236115	240458	4344	-	CIL1093S0029
scaffold83237	699400	699522	123	strongHypo	-0.267	5.9e-10	Distal Intergenic	695976	697322	1347	+	CIL1093S0096
scaffold83237	927062	927170	109	strongHyper	0.296	2.1e-10	Distal Intergenic	936552	937579	1028	+	CIL1093S0108
scaffold83237	1086976	1087036	61	strongHypo	-0.317	2.4e-07	Distal Intergenic	1081967	1083140	1174	-	CIL1093S0112
scaffold83237	1271520	1271610	91	strongHyper	0.235	0.000727	Promoter (1-2kb)	1267118	1269657	2540	-	CIL1093S0119
scaffold83237	1395100	1395106	7	strongHyper	0.274	1.06e-09	Distal Intergenic	1361969	1368089	6121	-	CIL1093S0125
scaffold83237	1496901	1496976	76	strongHypo	-0.307	3.41e-09	Distal Intergenic	1566667	1567959	1293	-	CIL1093S0132
scaffold83237	1652162	1652178	17	strongHyper	0.271	1.79e-08	Distal Intergenic	1617309	1618079	771	-	CIL1093S0134
scaffold83570	295275	295441	167	strongHypo	-0.323	1.56e-05	Distal Intergenic	288094	289790	1697	-	CIL1096S0008
scaffold83570	310429	310561	133	strongHypo	-0.309	5.89e-08	Distal Intergenic	298790	304626	5837	-	CIL1096S0009
scaffold83570	353013	353061	49	strongHypo	-0.248	1.87e-08	3' UTR	349081	349968	888	-	CIL1096S0011
scaffold83570	589442	589446	5	strongHyper	0.326	3.43e-06	Promoter (<=1kb)	590028	621025	30998	+	CIL1096S0025
scaffold83570	1144984	1145000	17	strongHyper	0.326	3e-10	Intron (CIL1096S0044.mRNA/CIL1096S0044, intron 4 of 4)	1142705	1146890	4186	+	CIL1096S0044
scaffold83570	1529320	1529349	30	strongHypo	-0.325	5.41e-11	Intron (CIL1096S0072.mRNA/CIL1096S0072, intron 8 of 11)	1522802	1532629	9828	+	CIL1096S0072
scaffold83793	276389	276471	83	strongHyper	0.257	2.71e-07	Distal Intergenic	256949	263177	6229	-	CIL1099S0019
scaffold83793	1206954	1206967	14	strongHypo	-0.287	4.32e-05	Promoter (2-3kb)	1209146	1213617	4472	+	CIL1099S0097
scaffold83793	1266007	1266159	153	strongHypo	-0.283	1.49e-06	Promoter (<=1kb)	1265850	1266002	153	-	CIL1099S0100
scaffold83793	1279442	1279634	193	strongHyper	0.207	1.19e-12	Distal Intergenic	1266020	1266484	465	-	CIL1099S0101
scaffold83904	152343	152355	13	strongHyper	0.285	7.91e-07	Promoter (<=1kb)	153169	154624	1456	+	CIL1100S0014
scaffold83904	207126	207154	29	strongHypo	-0.304	2.05e-09	Distal Intergenic	193276	197133	3858	-	CIL1100S0022
scaffold83904	396908	397099	192	strongHypo	-0.226	3.67e-06	Distal Intergenic	408573	413197	4625	-	CIL1100S0040
scaffold83904	651540	651571	32	strongHyper	0.245	1.77e-11	Distal Intergenic	581291	584922	3632	-	CIL1100S0049
scaffold83904	869788	870021	234	strongHypo	-0.215	5.79e-13	Distal Intergenic	860085	864156	4072	-	CIL1100S0054
scaffold83904	1356032	1356058	27	strongHypo	-0.272	1.43e-08	Distal Intergenic	1359395	1363371	3977	+	CIL1100S0097
scaffold84237	1452946	1452977	32	strongHyper	0.327	1.39e-06	Distal Intergenic	1462894	1468033	5140	+	CIL1102S0095
scaffold84237	1507343	1507377	35	strongHypo	-0.238	1.75e-05	Intron (CIL1102S0098.mRNA/CIL1102S0098, intron 6 of 8)	1505578	1508636	3059	+	CIL1102S0098
scaffold84237	1529470	1529527	58	strongHypo	-0.237	0.00017	Distal Intergenic	1521402	1524272	2871	-	CIL1102S0101
scaffold84348	341636	341928	293	strongHypo	-0.417	4.47e-19	Promoter (2-3kb)	338259	339587	1329	-	CIL1104S0018
scaffold84348	586361	586628	268	strongHypo	-0.203	1.98e-06	Distal Intergenic	560004	566573	6570	-	CIL1104S0028
scaffold84348	664951	665411	461	strongHypo	-0.492	8.65e-16	Distal Intergenic	645333	646315	983	-	CIL1104S0033
scaffold84348	750536	750573	38	strongHyper	0.239	0.000157	Distal Intergenic	762927	807437	44511	-	CIL1104S0036
scaffold84459	20167	20296	130	strongHypo	-0.207	7.05e-10	Distal Intergenic	2662	3914	1253	-	CIL1105S0001
scaffold84459	66520	66535	16	strongHyper	0.249	8.43e-10	Distal Intergenic	80903	82857	1955	+	CIL1105S0005
scaffold84459	104980	105007	28	strongHyper	0.347	7.08e-07	Distal Intergenic	105576	109602	4027	-	CIL1105S0008
scaffold84459	388928	389239	312	strongHyper	0.214	2.59e-15	Distal Intergenic	405108	415889	10782	-	CIL1105S0019
scaffold84459	620153	620176	24	strongHypo	-0.241	6.91e-07	Distal Intergenic	658459	666424	7966	+	CIL1105S0025
scaffold84459	621672	621685	14	strongHypo	-0.357	8.16e-14	Distal Intergenic	658459	666424	7966	+	CIL1105S0025
scaffold84459	745180	745247	68	strongHypo	-0.27	1.57e-06	Distal Intergenic	778480	809243	30764	-	CIL1105S0029
scaffold84459	894594	894637	44	strongHyper	0.359	7.95e-09	Distal Intergenic	873573	875919	2347	+	CIL1105S0032
scaffold84459	918815	918841	27	strongHyper	0.234	2.37e-09	Distal Intergenic	934483	943783	9301	+	CIL1105S0034
scaffold85681	138492	138512	21	strongHyper	0.313	9.69e-08	Distal Intergenic	133098	133923	826	-	CIL1114S0006
scaffold85681	138650	138683	34	strongHypo	-0.418	3.25e-19	Distal Intergenic	133098	133923	826	-	CIL1114S0006
scaffold85681	211478	211598	121	strongHyper	0.277	4.77e-05	Distal Intergenic	177055	185998	8944	+	CIL1114S0009
scaffold85681	1120725	1120774	50	strongHyper	0.539	1.91e-07	Promoter (1-2kb)	1122340	1124867	2528	+	CIL1114S0037
scaffold85681	1231021	1231138	118	strongHyper	0.234	7.61e-11	Promoter (<=1kb)	1229984	1230457	474	-	CIL1114S0049
scaffold85681	1242851	1242875	25	strongHypo	-0.463	3.43e-07	Promoter (2-3kb)	1245723	1246658	936	+	CIL1114S0050
scaffold85681	1314703	1314753	51	strongHyper	0.269	2.92e-06	Promoter (1-2kb)	1310162	1312940	2779	-	CIL1114S0060
scaffold85792	447391	447579	189	strongHypo	-0.219	2.91e-08	Promoter (1-2kb)	449307	459714	10408	+	CIL1118S0020
scaffold85792	694533	694562	30	strongHypo	-0.559	6.88e-24	Distal Intergenic	721697	722098	402	+	CIL1118S0026
scaffold85792	1211043	1211089	47	strongHypo	-0.3	1.39e-05	Promoter (<=1kb)	1186369	1210275	23907	-	CIL1118S0067
scaffold85792	1397566	1397574	9	strongHypo	-0.275	6.28e-06	Promoter (<=1kb)	1398560	1411038	12479	+	CIL1118S0080
scaffold86459	143191	143202	12	strongHypo	-0.312	8.03e-08	Distal Intergenic	154769	161597	6829	+	CIL1127S0007
scaffold86459	476707	476766	60	strongHyper	0.236	4.95e-06	Exon (CIL1127S0022.mRNA/CIL1127S0022, exon 16 of 16)	437439	454875	17437	+	CIL1127S0018
scaffold86459	744764	744792	29	strongHypo	-0.3	7.68e-07	Exon (CIL1127S0044.mRNA/CIL1127S0044, exon 2 of 11)	739391	745627	6237	-	CIL1127S0044
scaffold86459	817085	817099	15	strongHyper	0.27	3.29e-08	Distal Intergenic	805314	812766	7453	-	CIL1127S0049
scaffold86459	987539	987563	25	strongHypo	-0.286	5.45e-07	Promoter (<=1kb)	988184	992551	4368	+	CIL1127S0073
scaffold86459	1219859	1219927	69	strongHyper	0.223	0.000126	Distal Intergenic	1204989	1212137	7149	+	CIL1127S0087
scaffold86459	1278958	1278998	41	strongHyper	0.279	9.82e-09	Promoter (2-3kb)	1266998	1276694	9697	-	CIL1127S0088
scaffold86459	1520232	1520278	47	strongHyper	0.265	5.61e-08	Promoter (1-2kb)	1521324	1537468	16145	+	CIL1127S0101
scaffold86570	497190	497267	78	strongHypo	-0.266	4.94e-08	Promoter (1-2kb)	493241	495868	2628	-	CIL1128S0024
scaffold86570	822246	822274	29	strongHyper	0.39	5.74e-17	Distal Intergenic	835524	838736	3213	+	CIL1128S0038
scaffold86570	825909	825936	28	strongHyper	0.32	6.6e-09	Distal Intergenic	835524	838736	3213	+	CIL1128S0038
scaffold86570	1080701	1080880	180	strongHypo	-0.396	8.56e-14	Promoter (<=1kb)	1077724	1080024	2301	-	CIL1128S0043
scaffold86570	1455102	1455115	14	strongHypo	-0.518	1.88e-17	Promoter (<=1kb)	1451333	1454523	3191	-	CIL1128S0060
scaffold86570	1531352	1531428	77	strongHyper	0.249	5.66e-07	Distal Intergenic	1497000	1498625	1626	-	CIL1128S0064
scaffold87015	297802	297814	13	strongHypo	-0.327	5.2e-06	Promoter (1-2kb)	299436	307173	7738	+	CIL1132S0009
scaffold87015	405157	405193	37	strongHyper	0.3	2.2e-05	Exon (CIL1132S0020.mRNA/CIL1132S0020, exon 1 of 1)	404072	406162	2091	+	CIL1132S0020
scaffold87015	1272425	1272464	40	strongHyper	0.215	1.28e-05	Exon (CIL1132S0069.mRNA/CIL1132S0069, exon 6 of 7)	1271684	1275756	4073	-	CIL1132S0069
scaffold88014	444806	444815	10	strongHypo	-0.288	2.94e-06	Distal Intergenic	471692	474985	3294	+	CIL1141S0011
scaffold88014	901861	901890	30	strongHypo	-0.471	1.22e-15	Distal Intergenic	903246	904269	1024	-	CIL1141S0037
scaffold88014	1519111	1519157	47	strongHyper	0.365	1.36e-08	Distal Intergenic	1471335	1472295	961	+	CIL1141S0064
scaffold91347	158696	158726	31	strongHyper	0.334	3.05e-12	Distal Intergenic	137061	137351	291	-	CIL1167S0011
scaffold91347	581013	581106	94	strongHyper	0.336	6.05e-12	Promoter (1-2kb)	578422	580056	1635	-	CIL1167S0034
scaffold91347	640007	640096	90	strongHypo	-0.312	5.25e-07	Distal Intergenic	633982	635538	1557	-	CIL1167S0037
scaffold91347	737843	737880	38	strongHypo	-0.216	5.39e-10	Distal Intergenic	725831	728248	2418	-	CIL1167S0040
scaffold91347	761152	761302	151	strongHyper	0.216	3.86e-12	Distal Intergenic	764456	765835	1380	+	CIL1167S0042
scaffold91347	795592	795598	7	strongHypo	-0.366	2.71e-07	Distal Intergenic	787582	794823	7242	+	CIL1167S0044
scaffold91347	981916	982007	92	strongHyper	0.269	3.88e-07	Intron (CIL1167S0059.mRNA/CIL1167S0059, intron 3 of 15)	950665	963302	12638	-	CIL1167S0057
scaffold91347	1039610	1039735	126	strongHypo	-0.278	1.95e-07	Distal Intergenic	1052536	1056049	3514	+	CIL1167S0064
scaffold91347	1082935	1083040	106	strongHypo	-0.231	2.11e-05	Promoter (1-2kb)	1077976	1081110	3135	-	CIL1167S0069
scaffold91347	1098580	1098645	66	strongHypo	-0.304	2.04e-07	Distal Intergenic	1104617	1106769	2153	+	CIL1167S0070
scaffold91347	1162430	1162464	35	strongHypo	-0.205	0.000244	Promoter (<=1kb)	1163066	1165266	2201	+	CIL1167S0074
scaffold91347	1309694	1309724	31	strongHyper	0.251	2.91e-08	Distal Intergenic	1364452	1367634	3183	-	CIL1167S0079
Item	Description
chromosome	the chromosome in which DMR is located.
start	the start site of the DMR in the chromosome.
end	the end site of the DMR in the chromosome.
width	the length of the DMR.
meth direction	change type in methylation level of the DMR in PV grafts relative to that of SV grafts (SV: grafts with strong growth vigor on tall rootstocks; PV: grafts with poor growth vigor on short rootstocks)
methDif	the methylation level in DMR of PV grafts – those of SV grafts
p	significance of differnces in methylation levels of DMRs.
annotation	gene region in which DMR is located.
geneStart	the start site of the DMG in the chromosome.
geneEnd	the end site of the DMG in the chromosome.
geneLength	the length of the DMG
geneStrand	"+" represents the sense strand, "-" refers to the antisense strand.
geneId	the ID of gene that the DMR is located in.

## Sheet: CHG
Table S2 DMRs and DMGs in CHG context
Information of DMRs								Information of DMGs
chromosome	start	end	width	meth direction	methDif	p	annotation	geneStart	geneEnd	geneLength	geneStrand	geneId
scaffold68792	56821	57057	237	strongHyper	0.11	0.00547	Intron (CIL0893S0007.mRNA/CIL0893S0007, intron 6 of 8)	49936	53100	3165	-	CIL0893S0006
scaffold68792	131796	131985	190	strongHyper	0.112	0.00237	Distal Intergenic	120817	123126	2310	-	CIL0893S0016
scaffold68792	344569	344914	346	strongHyper	0.156	3.45e-11	Intron (CIL0893S0045.mRNA/CIL0893S0045, intron 2 of 4)	340163	349099	8937	+	CIL0893S0045
scaffold68792	407203	407328	126	strongHypo	-0.192	9.68e-07	Promoter (1-2kb)	403182	406029	2848	-	CIL0893S0054
scaffold68792	652847	652857	11	strongHyper	0.165	0.000171	Distal Intergenic	677591	683312	5722	-	CIL0893S0073
scaffold68792	747538	747819	282	strongHypo	-0.14	0.0132	Distal Intergenic	734320	734763	444	-	CIL0893S0078
scaffold68792	805989	806143	155	strongHyper	0.129	1.05e-08	Exon (CIL0893S0086.mRNA/CIL0893S0086, exon 8 of 9)	803449	804311	863	+	CIL0893S0085
scaffold68792	1043462	1043579	118	strongHyper	0.169	2.58e-05	Intron (CIL0893S0123.mRNA/CIL0893S0123, intron 2 of 3)	1041670	1045181	3512	-	CIL0893S0123
scaffold68792	1308555	1308713	159	strongHyper	0.118	8.6e-05	Promoter (<=1kb)	1309363	1314194	4832	+	CIL0893S0157
scaffold68792	1412010	1412064	55	strongHypo	-0.245	2.5e-05	Distal Intergenic	1378184	1401609	23426	+	CIL0893S0160
scaffold68792	1527871	1527888	18	strongHypo	-0.195	0.000108	Distal Intergenic	1557038	1565676	8639	+	CIL0893S0165
scaffold68792	1557560	1557688	129	strongHypo	-0.32	3.91e-12	Intron (CIL0893S0165.mRNA/CIL0893S0165, intron 1 of 1)	1557038	1565676	8639	+	CIL0893S0165
scaffold68792	1582512	1582785	274	strongHypo	-0.115	0.00417	Distal Intergenic	1557038	1565676	8639	+	CIL0893S0165
scaffold68792	1588582	1588698	117	strongHypo	-0.113	0.00272	Distal Intergenic	1557038	1565676	8639	+	CIL0893S0165
scaffold68792	1611416	1611497	82	strongHyper	0.215	0.00142	Distal Intergenic	1622503	1625203	2701	+	CIL0893S0168
scaffold68792	1622629	1622682	54	strongHyper	0.182	1.97e-05	Exon (CIL0893S0168.mRNA/CIL0893S0168, exon 1 of 5)	1622503	1625203	2701	+	CIL0893S0168
scaffold68792	1628988	1629201	214	strongHypo	-0.147	0.000228	Distal Intergenic	1622503	1625203	2701	+	CIL0893S0168
scaffold68792	1717248	1717330	83	strongHypo	-0.304	0.00292	Promoter (<=1kb)	1715080	1716349	1270	-	CIL0893S0170
scaffold68792	1749499	1749622	124	strongHypo	-0.203	6.97e-05	Distal Intergenic	1775109	1776761	1653	-	CIL0893S0173
scaffold68792	1805405	1805717	313	strongHyper	0.158	0.00445	Distal Intergenic	1800877	1801258	382	+	CIL0893S0174
scaffold68792	1975405	1975418	14	strongHypo	-0.209	2.75e-08	Intron (CIL0893S0182.mRNA/CIL0893S0182, intron 5 of 10)	1965467	1979243	13777	-	CIL0893S0182
scaffold68792	2008546	2008755	210	strongHypo	-0.115	6.6e-07	Distal Intergenic	2036618	2063196	26579	+	CIL0893S0183
scaffold68792	2091758	2091902	145	strongHyper	0.182	4.4e-08	Promoter (1-2kb)	2083078	2090400	7323	-	CIL0893S0186
scaffold68792	2098267	2098317	51	strongHypo	-0.196	2.3e-05	Distal Intergenic	2083078	2090400	7323	-	CIL0893S0186
scaffold68792	2431281	2431294	14	strongHyper	0.248	6.89e-12	Exon (CIL0893S0205.mRNA/CIL0893S0205, exon 9 of 18)	2425855	2437947	12093	+	CIL0893S0205
scaffold68792	2483116	2483232	117	strongHyper	0.187	2.48e-06	Intron (CIL0893S0210.mRNA/CIL0893S0210, intron 1 of 6)	2481696	2495949	14254	+	CIL0893S0210
scaffold68792	2504494	2504519	26	strongHypo	-0.386	3.93e-07	Promoter (2-3kb)	2507211	2509138	1928	+	CIL0893S0212
scaffold68792	2653337	2653404	68	strongHyper	0.218	0.00257	Intron (CIL0893S0228.mRNA/CIL0893S0228, intron 12 of 15)	2631946	2665454	33509	-	CIL0893S0228
scaffold68792	2658585	2658683	99	strongHypo	-0.17	8.44e-05	Intron (CIL0893S0228.mRNA/CIL0893S0228, intron 12 of 15)	2631946	2665454	33509	-	CIL0893S0228
scaffold68792	2659791	2659818	28	strongHyper	0.155	0.000165	Intron (CIL0893S0228.mRNA/CIL0893S0228, intron 12 of 15)	2631946	2665454	33509	-	CIL0893S0228
scaffold68792	2759001	2759151	151	strongHypo	-0.141	0.00184	Distal Intergenic	2745184	2747278	2095	+	CIL0893S0235
scaffold68792	2828683	2828690	8	strongHypo	-0.265	4.76e-08	Distal Intergenic	2815994	2819568	3575	+	CIL0893S0241
scaffold68792	2892338	2892575	238	strongHypo	-0.246	1.26e-09	Distal Intergenic	2885003	2885359	357	-	CIL0893S0246
scaffold68792	2912903	2912923	21	strongHyper	0.326	0.000124	Intron (CIL0893S0250.mRNA/CIL0893S0250, intron 2 of 4)	2911292	2915863	4572	-	CIL0893S0250
scaffold68792	2947152	2947415	264	strongHyper	0.205	5.48e-09	Distal Intergenic	2942284	2942855	572	+	CIL0893S0255
scaffold68792	2987751	2987917	167	strongHypo	-0.19	5.41e-05	Promoter (1-2kb)	2982549	2985956	3408	-	CIL0893S0259
scaffold68792	3009896	3010021	126	strongHyper	0.258	6.9e-10	Distal Intergenic	3017252	3021046	3795	+	CIL0893S0262
scaffold68792	3056594	3056648	55	strongHyper	0.165	2.25e-05	Intron (CIL0893S0265.mRNA/CIL0893S0265, intron 3 of 3)	3052050	3057134	5085	+	CIL0893S0265
scaffold68792	3345382	3345391	10	strongHyper	0.324	4.4e-10	Distal Intergenic	3350687	3352264	1578	+	CIL0893S0298
scaffold68792	3506306	3506475	170	strongHyper	0.104	0.00773	Intron (CIL0893S0310.mRNA/CIL0893S0310, intron 5 of 13)	3503157	3513593	10437	+	CIL0893S0310
scaffold68792	3588957	3588970	14	strongHyper	0.38	8.02e-06	Distal Intergenic	3585557	3587185	1629	+	CIL0893S0321
scaffold68792	3672778	3672805	28	strongHypo	-0.133	0.00714	Distal Intergenic	3670094	3671887	1794	+	CIL0893S0329
scaffold68792	3931085	3931361	277	strongHypo	-0.109	0.00322	Intron (CIL0893S0363.mRNA/CIL0893S0363, intron 4 of 14)	3928710	3934603	5894	+	CIL0893S0363
scaffold68792	3958771	3958801	31	strongHyper	0.309	9.5e-06	Intron (CIL0893S0365.mRNA/CIL0893S0365, intron 1 of 13)	3957410	3968397	10988	+	CIL0893S0365
scaffold68792	4190081	4190275	195	strongHyper	0.121	6.04e-08	Exon (CIL0893S0385.mRNA/CIL0893S0385, exon 2 of 8)	4188131	4194062	5932	+	CIL0893S0385
scaffold68792	4190749	4190878	130	strongHyper	0.122	1.01e-07	Intron (CIL0893S0385.mRNA/CIL0893S0385, intron 2 of 7)	4188131	4194062	5932	+	CIL0893S0385
scaffold68792	4329843	4329994	152	strongHypo	-0.208	2.47e-08	Promoter (2-3kb)	4326617	4327169	553	-	CIL0893S0399
scaffold68792	4434140	4434200	61	strongHypo	-0.182	1.4e-05	Promoter (1-2kb)	4428661	4432901	4241	-	CIL0893S0409
scaffold68792	4553957	4553970	14	strongHyper	0.53	2.28e-06	Promoter (<=1kb)	4554302	4557506	3205	+	CIL0893S0428
scaffold68792	4604295	4604371	77	strongHypo	-0.208	3.61e-05	Intron (CIL0893S0432.mRNA/CIL0893S0432, intron 5 of 11)	4590154	4616160	26007	-	CIL0893S0432
scaffold68792	4608227	4609221	995	strongHypo	-0.102	2.44e-09	Intron (CIL0893S0432.mRNA/CIL0893S0432, intron 5 of 11)	4590154	4616160	26007	-	CIL0893S0432
scaffold68903	8195	8222	28	strongHypo	-0.54	1.96e-11	Distal Intergenic	25966	27056	1091	-	CIL0895S0001
scaffold68903	35672	35845	174	strongHyper	0.247	3.38e-08	Distal Intergenic	28397	29457	1061	-	CIL0895S0002
scaffold68903	140842	140850	9	strongHypo	-0.467	1.74e-10	Intron (CIL0895S0011.mRNA/CIL0895S0011, intron 11 of 19)	148551	153207	4657	+	CIL0895S0012
scaffold68903	144228	144421	194	strongHyper	0.166	2.83e-06	Intron (CIL0895S0011.mRNA/CIL0895S0011, intron 14 of 19)	148551	153207	4657	+	CIL0895S0012
scaffold68903	170711	170877	167	strongHyper	0.111	0.000487	Intron (CIL0895S0015.mRNA/CIL0895S0015, intron 4 of 7)	166969	179239	12271	+	CIL0895S0015
scaffold68903	175651	175924	274	strongHypo	-0.105	0.000439	Intron (CIL0895S0015.mRNA/CIL0895S0015, intron 4 of 7)	166969	179239	12271	+	CIL0895S0015
scaffold68903	216005	216012	8	strongHypo	-0.153	9.01e-06	Intron (CIL0895S0018.mRNA/CIL0895S0018, intron 1 of 1)	214262	217270	3009	+	CIL0895S0018
scaffold68903	251954	252177	224	strongHypo	-0.106	0.00022	Distal Intergenic	256610	259047	2438	+	CIL0895S0020
scaffold68903	338408	338516	109	strongHyper	0.232	6.05e-05	Distal Intergenic	340626	341024	399	-	CIL0895S0025
scaffold68903	494966	495042	77	strongHyper	0.311	5.45e-30	Distal Intergenic	483514	487197	3684	-	CIL0895S0037
scaffold68903	519784	519833	50	strongHypo	-0.213	1.03e-06	Intron (CIL0895S0041.mRNA/CIL0895S0041, intron 4 of 16)	506871	509180	2310	-	CIL0895S0040
scaffold68903	566796	566995	200	strongHypo	-0.159	0.000133	Distal Intergenic	587105	592769	5665	+	CIL0895S0045
scaffold68903	577072	577078	7	strongHypo	-0.191	1.29e-07	Distal Intergenic	587105	592769	5665	+	CIL0895S0045
scaffold68903	610140	610680	541	strongHypo	-0.134	9.42e-11	Distal Intergenic	587105	592769	5665	+	CIL0895S0045
scaffold68903	637532	637653	122	strongHyper	0.169	1.37e-06	Intron (CIL0895S0046.mRNA/CIL0895S0046, intron 3 of 14)	634806	671286	36481	+	CIL0895S0046
scaffold68903	705772	706158	387	strongHyper	0.122	2.59e-05	Intron (CIL0895S0048.mRNA/CIL0895S0048, intron 2 of 12)	703384	718662	15279	+	CIL0895S0048
scaffold68903	707752	707783	32	strongHyper	0.166	5.7e-05	Intron (CIL0895S0048.mRNA/CIL0895S0048, intron 2 of 12)	703384	718662	15279	+	CIL0895S0048
scaffold68903	874876	874937	62	strongHypo	-0.133	4.11e-05	Intron (CIL0895S0055.mRNA/CIL0895S0055, intron 1 of 4)	868810	883837	15028	-	CIL0895S0055
scaffold68903	909010	909132	123	strongHypo	-0.124	0.000819	Intron (CIL0895S0057.mRNA/CIL0895S0057, intron 14 of 17)	893154	914227	21074	-	CIL0895S0057
scaffold68903	1006033	1006241	209	strongHypo	-0.288	4.12e-07	Distal Intergenic	1035733	1039330	3598	+	CIL0895S0062
scaffold68903	1078963	1079284	322	strongHypo	-0.156	7.18e-06	Distal Intergenic	1071085	1078658	7574	+	CIL0895S0064
scaffold68903	1124437	1124484	48	strongHypo	-0.11	0.000171	Distal Intergenic	1164259	1169874	5616	+	CIL0895S0066
scaffold68903	1264467	1264524	58	strongHypo	-0.113	0.00276	Distal Intergenic	1244451	1245196	746	+	CIL0895S0070
scaffold68903	1589978	1590001	24	strongHypo	-0.192	0.00296	Distal Intergenic	1638219	1638383	165	+	CIL0895S0075
scaffold68903	1732197	1732305	109	strongHypo	-0.226	3.82e-05	Distal Intergenic	1735525	1736613	1089	-	CIL0895S0080
scaffold68903	1766556	1766576	21	strongHyper	0.261	2.1e-07	Distal Intergenic	1780091	1780937	847	-	CIL0895S0081
scaffold68903	1860357	1860487	131	strongHypo	-0.172	0.000587	Promoter (2-3kb)	1856832	1857885	1054	-	CIL0895S0084
scaffold68903	1925536	1925716	181	strongHyper	0.168	4.72e-05	Promoter (<=1kb)	1921405	1925220	3816	-	CIL0895S0088
scaffold68903	1930753	1930899	147	strongHyper	0.255	5.32e-12	Distal Intergenic	1921405	1925220	3816	-	CIL0895S0088
scaffold68903	1982215	1982353	139	strongHypo	-0.122	0.00109	Distal Intergenic	1988709	1991043	2335	+	CIL0895S0089
scaffold68903	2042963	2042987	25	strongHypo	-0.185	0.0032	3' UTR	2040093	2043529	3437	+	CIL0895S0092
scaffold68903	2151831	2151950	120	strongHyper	0.142	0.000554	Distal Intergenic	2157839	2158829	991	-	CIL0895S0098
scaffold68903	2228093	2228278	186	strongHypo	-0.132	0.00865	Distal Intergenic	2236929	2239975	3047	-	CIL0895S0103
scaffold68903	2263362	2263462	101	strongHypo	-0.105	0.00448	Distal Intergenic	2273898	2278517	4620	-	CIL0895S0106
scaffold68903	2321833	2321998	166	strongHypo	-0.147	0.000173	Promoter (2-3kb)	2324003	2327642	3640	+	CIL0895S0110
scaffold68903	2359215	2359274	60	strongHypo	-0.114	9.59e-05	Distal Intergenic	2339648	2345253	5606	-	CIL0895S0112
scaffold68903	2385979	2386362	384	strongHyper	0.114	1.08e-05	Distal Intergenic	2382552	2383095	544	+	CIL0895S0113
scaffold68903	2553002	2553074	73	strongHypo	-0.352	3.48e-06	Distal Intergenic	2556553	2558115	1563	+	CIL0895S0131
scaffold68903	2584537	2584741	205	strongHypo	-0.102	0.00376	Distal Intergenic	2556553	2558115	1563	+	CIL0895S0131
scaffold68903	2897496	2897666	171	strongHypo	-0.117	0.00312	Distal Intergenic	2899820	2906964	7145	-	CIL0895S0152
scaffold68903	2904519	2904591	73	strongHypo	-0.15	0.000205	Intron (CIL0895S0152.mRNA/CIL0895S0152, intron 3 of 3)	2899820	2906964	7145	-	CIL0895S0152
scaffold68903	3001461	3001711	251	strongHypo	-0.2	1.98e-09	Intron (CIL0895S0156.mRNA/CIL0895S0156, intron 7 of 8)	2985818	3008353	22536	-	CIL0895S0156
scaffold68903	3022137	3022402	266	strongHypo	-0.244	3.04e-09	Intron (CIL0895S0157.mRNA/CIL0895S0157, intron 11 of 13)	3009982	3028045	18064	-	CIL0895S0157
scaffold68903	3133370	3133906	537	strongHyper	0.107	0.00168	Distal Intergenic	3099763	3104283	4521	+	CIL0895S0163
scaffold68903	3297493	3297523	31	strongHyper	0.182	4.97e-06	Intron (CIL0895S0173.mRNA/CIL0895S0173, intron 8 of 21)	3292463	3320896	28434	-	CIL0895S0173
scaffold68903	3305579	3305802	224	strongHyper	0.118	0.000173	Intron (CIL0895S0173.mRNA/CIL0895S0173, intron 9 of 21)	3292463	3320896	28434	-	CIL0895S0173
scaffold68903	3412629	3412729	101	strongHyper	0.153	9.52e-08	Distal Intergenic	3414613	3415585	973	-	CIL0895S0180
scaffold68903	3432933	3433075	143	strongHypo	-0.172	0.000383	Exon (CIL0895S0184.mRNA/CIL0895S0184, exon 2 of 3)	3430118	3436273	6156	+	CIL0895S0184
scaffold68903	3440679	3440887	209	strongHypo	-0.29	6.56e-07	Distal Intergenic	3446978	3455030	8053	+	CIL0895S0185
scaffold68903	3451405	3451447	43	strongHypo	-0.29	6.14e-08	Intron (CIL0895S0185.mRNA/CIL0895S0185, intron 5 of 9)	3446978	3455030	8053	+	CIL0895S0185
scaffold68903	3674864	3674891	28	strongHyper	0.295	0.000203	Distal Intergenic	3669077	3669484	408	+	CIL0895S0211
scaffold68903	3722285	3722417	133	strongHyper	0.215	1.33e-10	Distal Intergenic	3685546	3685805	260	+	CIL0895S0212
scaffold68903	3735599	3735634	36	strongHyper	0.28	1.89e-13	Distal Intergenic	3685546	3685805	260	+	CIL0895S0212
scaffold68903	3775468	3775603	136	strongHypo	-0.111	6.17e-08	Distal Intergenic	3820480	3821320	841	+	CIL0895S0213
scaffold68903	3888159	3888314	156	strongHypo	-0.172	0.000467	Intron (CIL0895S0218.mRNA/CIL0895S0218, intron 4 of 8)	3853161	3934463	81303	+	CIL0895S0218
scaffold68903	3958144	3958375	232	strongHypo	-0.285	2.42e-07	Distal Intergenic	3953419	3956922	3504	+	CIL0895S0220
scaffold68903	4458820	4458836	17	strongHyper	0.138	9.95e-09	Intron (CIL0895S0250.mRNA/CIL0895S0250, intron 4 of 6)	4455619	4461368	5750	-	CIL0895S0250
scaffold68903	4488171	4488180	10	strongHypo	-0.193	1.45e-06	Distal Intergenic	4470696	4482558	11863	-	CIL0895S0251
scaffold69014	195583	195785	203	strongHyper	0.207	1.5e-13	Distal Intergenic	203394	206480	3087	-	CIL0897S0009
scaffold69014	323208	323348	141	strongHyper	0.152	0.00229	Distal Intergenic	333102	334977	1876	-	CIL0897S0016
scaffold69014	384670	385108	439	strongHypo	-0.11	0.000527	Distal Intergenic	398391	403705	5315	+	CIL0897S0018
scaffold69014	417836	417919	84	strongHypo	-0.108	7.52e-05	Intron (CIL0897S0021.mRNA/CIL0897S0021, intron 5 of 5)	412967	421099	8133	+	CIL0897S0021
scaffold69014	817321	817682	362	strongHypo	-0.102	0.000711	Promoter (<=1kb)	815195	816997	1803	-	CIL0897S0040
scaffold69014	940269	940379	111	strongHyper	0.11	0.00521	Distal Intergenic	951093	958779	7687	-	CIL0897S0048
scaffold69014	1020955	1020994	40	strongHypo	-0.243	9.22e-06	Distal Intergenic	987985	988855	871	+	CIL0897S0050
scaffold69014	1065283	1065567	285	strongHyper	0.111	6.07e-06	Promoter (<=1kb)	1064531	1065250	720	-	CIL0897S0052
scaffold69014	1144549	1144635	87	strongHypo	-0.221	1.94e-07	Exon (CIL0897S0061.mRNA/CIL0897S0061, exon 2 of 2)	1141782	1145017	3236	+	CIL0897S0061
scaffold69014	1224768	1225118	351	strongHyper	0.178	2.64e-19	Intron (CIL0897S0068.mRNA/CIL0897S0068, intron 1 of 12)	1211640	1211828	189	-	CIL0897S0067
scaffold69014	1225511	1225524	14	strongHypo	-0.226	1.05e-05	Intron (CIL0897S0068.mRNA/CIL0897S0068, intron 1 of 12)	1222124	1238059	15936	-	CIL0897S0068
scaffold69014	1232888	1232904	17	strongHyper	0.242	9.49e-07	Intron (CIL0897S0068.mRNA/CIL0897S0068, intron 8 of 12)	1222124	1238059	15936	-	CIL0897S0068
scaffold69014	1390889	1391193	305	strongHypo	-0.204	5.92e-07	Distal Intergenic	1399901	1407875	7975	-	CIL0897S0076
scaffold69014	1439422	1439554	133	strongHypo	-0.163	3.34e-06	Distal Intergenic	1452939	1459232	6294	+	CIL0897S0077
scaffold69014	1522904	1523089	186	strongHypo	-0.187	0.000192	Distal Intergenic	1468945	1475493	6549	+	CIL0897S0078
scaffold69014	1525265	1525475	211	strongHypo	-0.197	6.05e-08	Distal Intergenic	1468945	1475493	6549	+	CIL0897S0078
scaffold69014	1526088	1526259	172	strongHypo	-0.186	4.72e-10	Distal Intergenic	1468945	1475493	6549	+	CIL0897S0078
scaffold69014	1550643	1550869	227	strongHypo	-0.122	0.00011	Distal Intergenic	1593745	1595038	1294	+	CIL0897S0083
scaffold69014	1638312	1638599	288	strongHypo	-0.213	1.97e-08	Distal Intergenic	1632329	1633698	1370	+	CIL0897S0086
scaffold69014	1668214	1668539	326	strongHyper	0.108	1.57e-06	Distal Intergenic	1655595	1657043	1449	+	CIL0897S0087
scaffold69014	1670520	1670786	267	strongHyper	0.114	0.000109	Distal Intergenic	1655595	1657043	1449	+	CIL0897S0087
scaffold69014	1671120	1671419	300	strongHyper	0.17	3.11e-09	Distal Intergenic	1655595	1657043	1449	+	CIL0897S0087
scaffold69014	1708782	1708984	203	strongHyper	0.105	0.000522	Intron (CIL0897S0089.mRNA/CIL0897S0089, intron 2 of 13)	1702391	1742523	40133	+	CIL0897S0089
scaffold69014	1737007	1737020	14	strongHyper	0.342	5.27e-11	Intron (CIL0897S0089.mRNA/CIL0897S0089, intron 8 of 13)	1748895	1749212	318	+	CIL0897S0090
scaffold69014	1742274	1742596	323	strongHypo	-0.118	0.000803	Exon (CIL0897S0089.mRNA/CIL0897S0089, exon 13 of 14)	1748895	1749212	318	+	CIL0897S0090
scaffold69014	1826744	1827005	262	strongHypo	-0.215	4.37e-09	Distal Intergenic	1773571	1792607	19037	-	CIL0897S0091
scaffold69014	1827226	1827307	82	strongHyper	0.188	6.73e-05	Distal Intergenic	1773571	1792607	19037	-	CIL0897S0091
scaffold69014	1987162	1987268	107	strongHypo	-0.272	3.03e-06	Distal Intergenic	1960165	1960404	240	-	CIL0897S0095
scaffold69014	2053796	2053839	44	strongHypo	-0.181	8.39e-05	Distal Intergenic	2140226	2153797	13572	+	CIL0897S0096
scaffold69014	2158701	2158965	265	strongHypo	-0.177	1.39e-05	Distal Intergenic	2140226	2153797	13572	+	CIL0897S0096
scaffold69014	2176470	2176686	217	strongHypo	-0.182	0.00112	Distal Intergenic	2180728	2196819	16092	+	CIL0897S0099
scaffold69014	2228178	2228222	45	strongHyper	0.2	2.71e-07	Distal Intergenic	2209547	2225493	15947	+	CIL0897S0100
scaffold69014	2229681	2229843	163	strongHyper	0.17	1.1e-07	Distal Intergenic	2209547	2225493	15947	+	CIL0897S0100
scaffold69014	2243192	2243321	130	strongHypo	-0.173	2.07e-06	Distal Intergenic	2266498	2269814	3317	-	CIL0897S0101
scaffold69014	2256533	2256798	266	strongHypo	-0.144	0.000193	Distal Intergenic	2266498	2269814	3317	-	CIL0897S0101
scaffold69014	2266134	2266193	60	strongHyper	0.228	2.74e-06	Distal Intergenic	2266498	2269814	3317	-	CIL0897S0101
scaffold69014	2333227	2333264	38	strongHyper	0.183	0.000471	Promoter (1-2kb)	2314296	2331905	17610	-	CIL0897S0104
scaffold69014	2356086	2356258	173	strongHypo	-0.317	1.13e-07	Intron (CIL0897S0106.mRNA/CIL0897S0106, intron 1 of 1)	2358049	2359117	1069	-	CIL0897S0107
scaffold69014	2429570	2429881	312	strongHypo	-0.193	3.42e-11	Distal Intergenic	2434668	2437277	2610	-	CIL0897S0112
scaffold69014	2456490	2456798	309	strongHypo	-0.119	0.000774	Distal Intergenic	2434668	2437277	2610	-	CIL0897S0112
scaffold69014	2496024	2496485	462	strongHypo	-0.134	9.68e-11	Distal Intergenic	2531755	2536588	4834	+	CIL0897S0115
scaffold69014	2534188	2534427	240	strongHyper	0.231	1.42e-07	Intron (CIL0897S0115.mRNA/CIL0897S0115, intron 4 of 4)	2531755	2536588	4834	+	CIL0897S0115
scaffold69014	2703302	2703377	76	strongHypo	-0.222	7.82e-06	Distal Intergenic	2648557	2653841	5285	-	CIL0897S0120
scaffold69014	2737809	2737871	63	strongHypo	-0.17	1.67e-07	Distal Intergenic	2648557	2653841	5285	-	CIL0897S0120
scaffold69014	2752077	2752270	194	strongHyper	0.173	1.22e-10	Distal Intergenic	2825369	2826586	1218	+	CIL0897S0127
scaffold69014	2779077	2779229	153	strongHypo	-0.182	1.85e-05	Distal Intergenic	2825369	2826586	1218	+	CIL0897S0127
scaffold69014	2856185	2856277	93	strongHyper	0.256	2.35e-07	Distal Intergenic	2849385	2851913	2529	+	CIL0897S0129
scaffold69014	2868161	2868382	222	strongHypo	-0.144	6.88e-09	Intron (CIL0897S0130.mRNA/CIL0897S0130, intron 7 of 9)	2858813	2869784	10972	-	CIL0897S0130
scaffold69014	3060600	3060637	38	strongHyper	0.283	2.02e-19	Distal Intergenic	3050650	3057023	6374	-	CIL0897S0139
scaffold69014	3072520	3072541	22	strongHypo	-0.252	2.5e-05	Promoter (<=1kb)	3072778	3077051	4274	+	CIL0897S0141
scaffold69014	3362809	3362867	59	strongHypo	-0.161	1.16e-05	Distal Intergenic	3364802	3366768	1967	-	CIL0897S0155
scaffold69014	3404220	3404701	482	strongHyper	0.161	2.18e-08	Distal Intergenic	3408786	3413722	4937	+	CIL0897S0157
scaffold69014	3426265	3426317	53	strongHypo	-0.21	1.45e-05	Promoter (1-2kb)	3418291	3424595	6305	-	CIL0897S0159
scaffold69014	3606699	3606868	170	strongHyper	0.103	1.05e-06	Promoter (2-3kb)	3609224	3612028	2805	+	CIL0897S0175
scaffold69125	110978	110997	20	strongHypo	-0.25	2.04e-05	Distal Intergenic	139790	140926	1137	-	CIL0899S0004
scaffold69125	125037	125210	174	strongHypo	-0.124	0.000738	Distal Intergenic	139790	140926	1137	-	CIL0899S0004
scaffold69125	242402	242693	292	strongHypo	-0.147	4.15e-05	Distal Intergenic	262064	293836	31773	+	CIL0899S0009
scaffold69125	264328	264376	49	strongHypo	-0.37	9.31e-09	Intron (CIL0899S0009.mRNA/CIL0899S0009, intron 2 of 13)	262064	293836	31773	+	CIL0899S0009
scaffold69125	265035	265067	33	strongHypo	-0.331	3.43e-13	Intron (CIL0899S0009.mRNA/CIL0899S0009, intron 2 of 13)	262064	293836	31773	+	CIL0899S0009
scaffold69125	302953	302980	28	strongHyper	0.157	0.00139	Distal Intergenic	314226	320760	6535	-	CIL0899S0010
scaffold69125	321572	321781	210	strongHypo	-0.116	0.0255	Promoter (1-2kb)	314226	320760	6535	-	CIL0899S0010
scaffold69125	426053	426382	330	strongHypo	-0.129	0.00217	Distal Intergenic	408118	408633	516	-	CIL0899S0015
scaffold69125	600427	600630	204	strongHypo	-0.21	2.34e-06	Promoter (2-3kb)	602881	607243	4363	+	CIL0899S0024
scaffold69125	985716	985731	16	strongHypo	-0.2	0.000715	Promoter (2-3kb)	982474	983579	1106	-	CIL0899S0047
scaffold69125	1306399	1306714	316	strongHypo	-0.167	4.73e-06	Distal Intergenic	1312456	1313118	663	+	CIL0899S0065
scaffold69125	1539352	1539571	220	strongHypo	-0.105	0.00212	Distal Intergenic	1569678	1570781	1104	+	CIL0899S0075
scaffold69125	1731006	1731133	128	strongHypo	-0.245	6.6e-07	Distal Intergenic	1743446	1747989	4544	+	CIL0899S0085
scaffold69125	1756363	1756455	93	strongHypo	-0.11	0.000903	Distal Intergenic	1743446	1747989	4544	+	CIL0899S0085
scaffold69125	1840829	1840896	68	strongHyper	0.116	0.00381	Distal Intergenic	1837137	1839075	1939	+	CIL0899S0092
scaffold69125	1949397	1949625	229	strongHyper	0.148	0.008	Distal Intergenic	1944720	1947534	2815	+	CIL0899S0100
scaffold69125	2067005	2067066	62	strongHypo	-0.124	5.81e-05	Intron (CIL0899S0108.mRNA/CIL0899S0108, intron 3 of 4)	2062112	2068334	6223	+	CIL0899S0108
scaffold69125	2234847	2235249	403	strongHypo	-0.109	0.00184	Distal Intergenic	2244875	2245084	210	+	CIL0899S0115
scaffold69125	2261173	2261268	96	strongHypo	-0.198	0.00037	Promoter (<=1kb)	2256274	2260992	4719	-	CIL0899S0117
scaffold69125	2345607	2345850	244	strongHypo	-0.1	0.00672	Distal Intergenic	2351432	2359042	7611	+	CIL0899S0128
scaffold69125	2370347	2370357	11	strongHypo	-0.388	5.29e-06	Intron (CIL0899S0129.mRNA/CIL0899S0129, intron 10 of 13)	2359198	2381399	22202	-	CIL0899S0129
scaffold69125	2410966	2411005	40	strongHypo	-0.347	6.91e-09	Distal Intergenic	2406399	2407526	1128	+	CIL0899S0130
scaffold69125	2438582	2438716	135	strongHypo	-0.328	2.96e-11	Distal Intergenic	2440179	2440787	609	-	CIL0899S0131
scaffold69125	2446513	2446574	62	strongHypo	-0.265	3.68e-13	Distal Intergenic	2440179	2440787	609	-	CIL0899S0131
scaffold69125	2621474	2621665	192	strongHypo	-0.191	1.62e-06	Distal Intergenic	2618907	2620034	1128	+	CIL0899S0149
scaffold69125	2636615	2636877	263	strongHyper	0.248	3.02e-15	Distal Intergenic	2618907	2620034	1128	+	CIL0899S0149
scaffold69125	2643851	2644076	226	strongHyper	0.122	0.00532	Distal Intergenic	2618907	2620034	1128	+	CIL0899S0149
scaffold69125	2723925	2724169	245	strongHyper	0.235	6.03e-06	Promoter (1-2kb)	2725213	2725998	786	+	CIL0899S0153
scaffold69125	2787006	2787215	210	strongHypo	-0.113	0.00165	Promoter (2-3kb)	2789606	2798432	8827	+	CIL0899S0159
scaffold69125	2828995	2829017	23	strongHyper	0.349	4.26e-09	Intron (CIL0899S0161.mRNA/CIL0899S0161, intron 9 of 13)	2823753	2830530	6778	-	CIL0899S0161
scaffold69125	2902608	2902975	368	strongHypo	-0.114	0.0143	Promoter (1-2kb)	2903750	2904434	685	+	CIL0899S0166
scaffold69125	2925474	2925681	208	strongHypo	-0.169	2.8e-05	Exon (CIL0899S0168.mRNA/CIL0899S0168, exon 3 of 3)	2925456	2927269	1814	-	CIL0899S0168
scaffold69125	3116190	3116323	134	strongHypo	-0.149	7.44e-05	Distal Intergenic	3110175	3110444	270	-	CIL0899S0177
scaffold69238	42522	42624	103	strongHypo	-0.176	0.000139	Intron (CIL0902S0005.mRNA/CIL0902S0005, intron 4 of 10)	36375	49302	12928	-	CIL0902S0005
scaffold69238	134858	134881	24	strongHypo	-0.223	8.12e-06	Intron (CIL0902S0010.mRNA/CIL0902S0010, intron 9 of 10)	116304	138747	22444	-	CIL0902S0010
scaffold69238	144442	144467	26	strongHyper	0.328	9.28e-06	Distal Intergenic	116304	138747	22444	-	CIL0902S0010
scaffold69238	199559	199885	327	strongHypo	-0.126	3.38e-05	Intron (CIL0902S0013.mRNA/CIL0902S0013, intron 12 of 12)	186289	208008	21720	+	CIL0902S0013
scaffold69238	205498	205594	97	strongHypo	-0.24	1.3e-07	Intron (CIL0902S0013.mRNA/CIL0902S0013, intron 12 of 12)	186289	208008	21720	+	CIL0902S0013
scaffold69238	249920	249982	63	strongHyper	0.198	1.55e-07	Promoter (2-3kb)	252835	254720	1886	+	CIL0902S0014
scaffold69238	332107	332366	260	strongHypo	-0.248	1.92e-09	Distal Intergenic	330717	331553	837	+	CIL0902S0021
scaffold69238	361485	361670	186	strongHyper	0.108	0.000899	Distal Intergenic	364293	370802	6510	-	CIL0902S0024
scaffold69238	363723	363935	213	strongHyper	0.122	0.000201	Distal Intergenic	364293	370802	6510	-	CIL0902S0024
scaffold69238	442435	442724	290	strongHypo	-0.389	1.32e-16	Distal Intergenic	430450	438578	8129	-	CIL0902S0030
scaffold69238	467090	467322	233	strongHypo	-0.143	2.85e-06	Intron (CIL0902S0031.mRNA/CIL0902S0031, intron 3 of 4)	454984	478024	23041	+	CIL0902S0031
scaffold69238	565795	565947	153	strongHypo	-0.287	7.87e-05	Exon (CIL0902S0040.mRNA/CIL0902S0040, exon 19 of 23)	556038	590154	34117	-	CIL0902S0040
scaffold69238	607723	607742	20	strongHyper	0.268	2.66e-06	Distal Intergenic	619077	656578	37502	+	CIL0902S0041
scaffold69238	621675	621936	262	strongHypo	-0.16	3.17e-05	Intron (CIL0902S0041.mRNA/CIL0902S0041, intron 1 of 19)	619077	656578	37502	+	CIL0902S0041
scaffold69238	640681	640916	236	strongHyper	0.147	0.000847	Intron (CIL0902S0041.mRNA/CIL0902S0041, intron 10 of 19)	658235	659900	1666	+	CIL0902S0042
scaffold69238	642471	642567	97	strongHyper	0.181	6.1e-05	Intron (CIL0902S0041.mRNA/CIL0902S0041, intron 10 of 19)	658235	659900	1666	+	CIL0902S0042
scaffold69238	662403	662603	201	strongHyper	0.107	0.000839	Distal Intergenic	658235	659900	1666	+	CIL0902S0042
scaffold69238	663789	663827	39	strongHypo	-0.224	2.5e-06	Distal Intergenic	658235	659900	1666	+	CIL0902S0042
scaffold69238	684553	684574	22	strongHypo	-0.258	4.33e-08	Distal Intergenic	678759	683136	4378	+	CIL0902S0045
scaffold69238	746296	746427	132	strongHypo	-0.121	0.000631	Intron (CIL0902S0050.mRNA/CIL0902S0050, intron 3 of 6)	740293	750733	10441	-	CIL0902S0050
scaffold69238	809707	810371	665	strongHyper	0.122	4.52e-09	Promoter (2-3kb)	805476	807453	1978	-	CIL0902S0054
scaffold69238	1273443	1273520	78	strongHyper	0.172	9.38e-06	Distal Intergenic	1255069	1256313	1245	-	CIL0902S0082
scaffold69238	1287825	1287885	61	strongHyper	0.194	1.77e-05	Distal Intergenic	1255069	1256313	1245	-	CIL0902S0082
scaffold69238	1340768	1340910	143	strongHypo	-0.128	8.67e-07	Distal Intergenic	1364361	1367237	2877	+	CIL0902S0084
scaffold69238	1384571	1384679	109	strongHyper	0.147	0.000309	Distal Intergenic	1373920	1374748	829	+	CIL0902S0086
scaffold69238	1397523	1397689	167	strongHypo	-0.105	0.000789	Distal Intergenic	1400416	1404384	3969	-	CIL0902S0088
scaffold69238	1419234	1419441	208	strongHypo	-0.105	0.000934	Distal Intergenic	1424056	1429476	5421	+	CIL0902S0089
scaffold69238	1639525	1639672	148	strongHypo	-0.249	7.22e-05	Distal Intergenic	1644974	1646011	1038	+	CIL0902S0103
scaffold69238	1843696	1843710	15	strongHyper	0.218	5.44e-07	Intron (CIL0902S0116.mRNA/CIL0902S0116, intron 10 of 12)	1835914	1867736	31823	+	CIL0902S0116
scaffold69238	1966565	1966578	14	strongHypo	-0.212	7.24e-06	Intron (CIL0902S0129.mRNA/CIL0902S0129, intron 8 of 12)	1955522	1971276	15755	-	CIL0902S0129
scaffold69238	2079374	2079401	28	strongHypo	-0.326	6.78e-08	Intron (CIL0902S0141.mRNA/CIL0902S0141, intron 1 of 15)	2078592	2087764	9173	+	CIL0902S0141
scaffold69238	2168428	2169028	601	strongHyper	0.128	7.47e-14	Intron (CIL0902S0149.mRNA/CIL0902S0149, intron 13 of 40)	2160721	2206300	45580	+	CIL0902S0149
scaffold69238	2183536	2183990	455	strongHyper	0.136	5.63e-13	Intron (CIL0902S0149.mRNA/CIL0902S0149, intron 18 of 40)	2160721	2206300	45580	+	CIL0902S0149
scaffold69238	2316116	2316126	11	strongHypo	-0.359	0.00119	Exon (CIL0902S0159.mRNA/CIL0902S0159, exon 2 of 4)	2311513	2320095	8583	-	CIL0902S0159
scaffold69238	2319969	2320000	32	strongHypo	-0.448	2.33e-07	5' UTR	2311513	2320095	8583	-	CIL0902S0159
scaffold69238	2450405	2450562	158	strongHypo	-0.13	2.78e-05	Distal Intergenic	2454202	2456118	1917	+	CIL0902S0172
scaffold69238	2462704	2462958	255	strongHyper	0.145	1.58e-05	Intron (CIL0902S0173.mRNA/CIL0902S0173, intron 3 of 14)	2458427	2481464	23038	+	CIL0902S0173
scaffold69238	2780242	2780331	90	strongHyper	0.102	0.00598	Distal Intergenic	2806580	2806979	400	+	CIL0902S0198
scaffold69238	2815305	2815785	481	strongHypo	-0.163	4.09e-10	Distal Intergenic	2816880	2822824	5945	-	CIL0902S0199
scaffold69793	58758	58862	105	strongHypo	-0.215	1.6e-10	Intron (CIL0906S0002.mRNA/CIL0906S0002, intron 3 of 5)	47412	73574	26163	-	CIL0906S0002
scaffold69793	80391	80410	20	strongHyper	0.204	1.47e-07	Distal Intergenic	47412	73574	26163	-	CIL0906S0002
scaffold69793	139788	139913	126	strongHyper	0.101	5.2e-05	Intron (CIL0906S0004.mRNA/CIL0906S0004, intron 1 of 2)	139681	140178	498	-	CIL0906S0004
scaffold69793	306496	306851	356	strongHyper	0.135	0.00173	Distal Intergenic	344199	349751	5553	+	CIL0906S0017
scaffold69793	342919	342964	46	strongHypo	-0.201	0.000888	Promoter (1-2kb)	344199	349751	5553	+	CIL0906S0017
scaffold69793	370181	370375	195	strongHyper	0.11	0.000134	Distal Intergenic	363694	366622	2929	-	CIL0906S0020
scaffold69793	401291	401399	109	strongHyper	0.116	0.000184	Intron (CIL0906S0024.mRNA/CIL0906S0024, intron 8 of 17)	388468	389793	1326	-	CIL0906S0023
scaffold69793	402919	403096	178	strongHyper	0.211	7.69e-13	Intron (CIL0906S0024.mRNA/CIL0906S0024, intron 8 of 17)	388468	389793	1326	-	CIL0906S0023
scaffold69793	744278	744365	88	strongHypo	-0.218	1.23e-07	Distal Intergenic	762104	827883	65780	-	CIL0906S0052
scaffold69793	840832	840856	25	strongHypo	-0.15	3.36e-05	Distal Intergenic	833626	836057	2432	+	CIL0906S0053
scaffold69793	957011	957077	67	strongHyper	0.176	0.000134	Distal Intergenic	891388	893927	2540	-	CIL0906S0056
scaffold69793	1412791	1413019	229	strongHyper	0.198	6.06e-07	Distal Intergenic	1426954	1430669	3716	+	CIL0906S0078
scaffold69793	1846440	1846687	248	strongHyper	0.114	5.03e-06	Promoter (1-2kb)	1843390	1844763	1374	-	CIL0906S0094
scaffold69793	1908972	1909125	154	strongHypo	-0.104	8.92e-12	Exon (CIL0906S0096.mRNA/CIL0906S0096, exon 5 of 18)	1899416	1921898	22483	+	CIL0906S0096
scaffold69793	1942784	1942902	119	strongHypo	-0.135	0.000666	Distal Intergenic	1973764	1974835	1072	-	CIL0906S0097
scaffold69793	1949463	1949469	7	strongHyper	0.256	9e-05	Distal Intergenic	1973764	1974835	1072	-	CIL0906S0097
scaffold69793	1976508	1976721	214	strongHyper	0.341	8.37e-09	Promoter (1-2kb)	1973764	1974835	1072	-	CIL0906S0097
scaffold69793	1976990	1977300	311	strongHypo	-0.123	9.7e-08	Promoter (2-3kb)	1973764	1974835	1072	-	CIL0906S0097
scaffold69793	1982258	1982313	56	strongHypo	-0.199	6.53e-06	Distal Intergenic	1973764	1974835	1072	-	CIL0906S0097
scaffold69793	2109391	2109589	199	strongHyper	0.108	0.00626	Distal Intergenic	2066380	2068472	2093	+	CIL0906S0101
scaffold69793	2264515	2264760	246	strongHypo	-0.136	0.00155	Distal Intergenic	2261480	2263999	2520	+	CIL0906S0106
scaffold69793	2358095	2358236	142	strongHypo	-0.148	5.17e-09	Distal Intergenic	2340835	2342819	1985	+	CIL0906S0113
scaffold69793	2626693	2626712	20	strongHyper	0.367	8.96e-07	Promoter (1-2kb)	2628117	2635172	7056	+	CIL0906S0131
scaffold69793	2642344	2642487	144	strongHypo	-0.168	0.000142	Intron (CIL0906S0132.mRNA/CIL0906S0132, intron 5 of 6)	2636030	2646345	10316	-	CIL0906S0132
scaffold69793	2661178	2661460	283	strongHypo	-0.179	7.81e-15	Intron (CIL0906S0134.mRNA/CIL0906S0134, intron 2 of 2)	2659479	2661859	2381	-	CIL0906S0134
scaffold69793	2661870	2661907	38	strongHypo	-0.249	0.00217	Promoter (<=1kb)	2659479	2661859	2381	-	CIL0906S0134
scaffold69793	2728117	2728317	201	strongHyper	0.133	0.00276	Distal Intergenic	2757108	2758127	1020	-	CIL0906S0139
scaffold69793	2730073	2730084	12	strongHyper	0.341	4.79e-08	Distal Intergenic	2757108	2758127	1020	-	CIL0906S0139
scaffold69793	2792938	2793036	99	strongHypo	-0.126	0.000139	Intron (CIL0906S0144.mRNA/CIL0906S0144, intron 4 of 4)	2759518	2761857	2340	-	CIL0906S0140
scaffold69793	2794463	2794573	111	strongHypo	-0.26	5.28e-06	Intron (CIL0906S0144.mRNA/CIL0906S0144, intron 4 of 4)	2759518	2761857	2340	-	CIL0906S0140
scaffold69793	2882991	2883264	274	strongHypo	-0.106	1.86e-05	Distal Intergenic	2880595	2881285	691	+	CIL0906S0149
scaffold69793	2935620	2935648	29	strongHypo	-0.265	3.38e-06	Intron (CIL0906S0152.mRNA/CIL0906S0152, intron 2 of 4)	2922258	2964702	42445	+	CIL0906S0152
scaffold69793	2949527	2949706	180	strongHyper	0.115	3.49e-05	Intron (CIL0906S0152.mRNA/CIL0906S0152, intron 4 of 4)	2922258	2964702	42445	+	CIL0906S0152
scaffold69793	2955201	2955472	272	strongHyper	0.108	7.74e-07	Intron (CIL0906S0152.mRNA/CIL0906S0152, intron 4 of 4)	2922258	2964702	42445	+	CIL0906S0152
scaffold69793	2975644	2975660	17	strongHypo	-0.258	2.55e-06	Distal Intergenic	2922258	2964702	42445	+	CIL0906S0152
scaffold69793	3117728	3117837	110	strongHypo	-0.218	6.6e-05	Distal Intergenic	2922258	2964702	42445	+	CIL0906S0152
scaffold69793	3155484	3155667	184	strongHyper	0.184	2.25e-15	Distal Intergenic	3334421	3336028	1608	+	CIL0906S0157
scaffold69793	3324590	3324863	274	strongHypo	-0.245	8.17e-12	Distal Intergenic	3334421	3336028	1608	+	CIL0906S0157
scaffold69793	3329035	3329162	128	strongHyper	0.117	0.00232	Distal Intergenic	3334421	3336028	1608	+	CIL0906S0157
scaffold69793	3337386	3337661	276	strongHyper	0.132	0.00016	Distal Intergenic	3334421	3336028	1608	+	CIL0906S0157
scaffold69793	3698585	3698595	11	strongHyper	0.254	1.96e-06	Distal Intergenic	3698966	3701194	2229	-	CIL0906S0176
scaffold69793	3703598	3703605	8	strongHyper	0.263	4.35e-06	Promoter (2-3kb)	3698966	3701194	2229	-	CIL0906S0176
scaffold69793	3725848	3725933	86	strongHyper	0.185	9.42e-06	Intron (CIL0906S0178.mRNA/CIL0906S0178, intron 2 of 2)	3724398	3726683	2286	+	CIL0906S0178
scaffold69904	115478	115881	404	strongHyper	0.126	1.23e-08	Intron (CIL0908S0006.mRNA/CIL0908S0006, intron 7 of 14)	95588	133381	37794	-	CIL0908S0006
scaffold69904	158284	158473	190	strongHyper	0.345	2.54e-07	Distal Intergenic	164575	167744	3170	+	CIL0908S0010
scaffold69904	192769	192891	123	strongHyper	0.108	0.0046	Distal Intergenic	173497	185505	12009	-	CIL0908S0011
scaffold69904	317448	317477	30	strongHyper	0.168	4.01e-09	Distal Intergenic	319984	321817	1834	-	CIL0908S0019
scaffold69904	333504	333788	285	strongHyper	0.107	0.000503	Intron (CIL0908S0020.mRNA/CIL0908S0020, intron 6 of 11)	330199	337942	7744	+	CIL0908S0020
scaffold69904	379192	379272	81	strongHypo	-0.193	7.1e-06	Exon (CIL0908S0026.mRNA/CIL0908S0026, exon 6 of 13)	377029	381817	4789	-	CIL0908S0026
scaffold69904	478654	478707	54	strongHypo	-0.399	9e-11	Intron (CIL0908S0034.mRNA/CIL0908S0034, intron 3 of 3)	476965	480571	3607	+	CIL0908S0034
scaffold69904	545485	545760	276	strongHyper	0.101	0.00826	Intron (CIL0908S0041.mRNA/CIL0908S0041, intron 1 of 26)	541815	579306	37492	+	CIL0908S0041
scaffold69904	559609	559797	189	strongHyper	0.185	4.02e-07	Intron (CIL0908S0041.mRNA/CIL0908S0041, intron 9 of 26)	541815	579306	37492	+	CIL0908S0041
scaffold69904	571750	571913	164	strongHypo	-0.208	6.91e-11	Intron (CIL0908S0041.mRNA/CIL0908S0041, intron 23 of 26)	579986	590693	10708	-	CIL0908S0042
scaffold69904	625152	625742	591	strongHyper	0.135	7.9e-05	Distal Intergenic	627985	632467	4483	-	CIL0908S0044
scaffold69904	648298	648388	91	strongHypo	-0.223	9.46e-06	Distal Intergenic	627985	632467	4483	-	CIL0908S0044
scaffold69904	968856	968927	72	strongHypo	-0.288	2.75e-08	Promoter (1-2kb)	964924	967507	2584	-	CIL0908S0064
scaffold69904	1069771	1069956	186	strongHypo	-0.13	1.3e-06	Distal Intergenic	1074986	1076199	1214	-	CIL0908S0074
scaffold69904	1070555	1070807	253	strongHyper	0.113	2.75e-05	Distal Intergenic	1074986	1076199	1214	-	CIL0908S0074
scaffold69904	1096903	1097043	141	strongHyper	0.108	0.0366	Distal Intergenic	1100964	1102683	1720	-	CIL0908S0076
scaffold69904	1374746	1375039	294	strongHypo	-0.124	2.61e-05	Intron (CIL0908S0093.mRNA/CIL0908S0093, intron 2 of 6)	1372144	1388656	16513	+	CIL0908S0093
scaffold69904	1443010	1443021	12	strongHyper	0.155	4.58e-06	Exon (CIL0908S0099.mRNA/CIL0908S0099, exon 8 of 15)	1439552	1451951	12400	-	CIL0908S0099
scaffold69904	1647008	1647291	284	strongHypo	-0.144	2.71e-09	Distal Intergenic	1676431	1678609	2179	-	CIL0908S0110
scaffold69904	1684827	1684881	55	strongHypo	-0.238	5.96e-06	Distal Intergenic	1688097	1689636	1540	+	CIL0908S0111
scaffold69904	1686748	1687176	429	strongHypo	-0.144	1.2e-07	Promoter (1-2kb)	1688097	1689636	1540	+	CIL0908S0111
scaffold69904	1874334	1874377	44	strongHypo	-0.172	5.43e-07	Distal Intergenic	1863058	1869848	6791	-	CIL0908S0122
scaffold69904	1883319	1883480	162	strongHyper	0.122	1.67e-07	Intron (CIL0908S0123.mRNA/CIL0908S0123, intron 2 of 5)	1880134	1892942	12809	-	CIL0908S0123
scaffold69904	2044430	2044452	23	strongHyper	0.276	5.48e-05	Intron (CIL0908S0128.mRNA/CIL0908S0128, intron 6 of 6)	2029856	2050810	20955	-	CIL0908S0128
scaffold69904	2046390	2046440	51	strongHypo	-0.117	0.000647	Intron (CIL0908S0128.mRNA/CIL0908S0128, intron 6 of 6)	2029856	2050810	20955	-	CIL0908S0128
scaffold69904	2082506	2082593	88	strongHyper	0.188	4.64e-07	Intron (CIL0908S0129.mRNA/CIL0908S0129, intron 4 of 6)	2070907	2087165	16259	-	CIL0908S0129
scaffold69904	2350029	2350040	12	strongHyper	0.256	4.75e-05	Exon (CIL0908S0148.mRNA/CIL0908S0148, exon 4 of 12)	2326876	2352148	25273	-	CIL0908S0148
scaffold69904	2356713	2356733	21	strongHyper	0.201	0.00128	Distal Intergenic	2326876	2352148	25273	-	CIL0908S0148
scaffold69904	2373074	2373232	159	strongHyper	0.345	1.67e-12	Distal Intergenic	2387267	2389395	2129	+	CIL0908S0152
scaffold69904	2423851	2423897	47	strongHyper	0.128	2.79e-06	Intron (CIL0908S0155.mRNA/CIL0908S0155, intron 6 of 9)	2420621	2429780	9160	-	CIL0908S0155
scaffold69904	2460625	2460745	121	strongHyper	0.19	1.65e-08	Distal Intergenic	2420621	2429780	9160	-	CIL0908S0155
scaffold69904	2493099	2493217	119	strongHyper	0.171	1.57e-06	Distal Intergenic	2506842	2511479	4638	+	CIL0908S0158
scaffold69904	2560569	2560621	53	strongHyper	0.148	0.0064	Exon (CIL0908S0164.mRNA/CIL0908S0164, exon 4 of 5)	2556827	2562651	5825	+	CIL0908S0164
scaffold69904	2565100	2565108	9	strongHyper	0.187	1.08e-06	Distal Intergenic	2556827	2562651	5825	+	CIL0908S0164
scaffold69904	2578082	2578223	142	strongHyper	0.198	1.53e-07	Intron (CIL0908S0165.mRNA/CIL0908S0165, intron 3 of 8)	2573724	2595782	22059	+	CIL0908S0165
scaffold69904	2585285	2585483	199	strongHyper	0.142	0.000177	Exon (CIL0908S0165.mRNA/CIL0908S0165, exon 7 of 9)	2573724	2595782	22059	+	CIL0908S0165
scaffold69904	2718967	2719022	56	strongHyper	0.211	2.95e-07	Intron (CIL0908S0175.mRNA/CIL0908S0175, intron 3 of 11)	2717267	2722599	5333	-	CIL0908S0175
scaffold69904	2787494	2787840	347	strongHyper	0.143	9.63e-05	Exon (CIL0908S0180.mRNA/CIL0908S0180, exon 2 of 14)	2758404	2792196	33793	-	CIL0908S0180
scaffold69904	2830707	2830747	41	strongHyper	0.333	1.44e-10	Exon (CIL0908S0181.mRNA/CIL0908S0181, exon 12 of 16)	2827925	2838177	10253	-	CIL0908S0181
scaffold69904	2836213	2836225	13	strongHyper	0.254	1.26e-05	Exon (CIL0908S0181.mRNA/CIL0908S0181, exon 3 of 16)	2827925	2838177	10253	-	CIL0908S0181
scaffold69904	2850812	2851024	213	strongHyper	0.141	0.00134	Distal Intergenic	2827925	2838177	10253	-	CIL0908S0181
scaffold69904	2858807	2858925	119	strongHyper	0.147	9e-05	Distal Intergenic	2827925	2838177	10253	-	CIL0908S0181
scaffold69904	2869254	2869287	34	strongHyper	0.245	1.76e-07	Distal Intergenic	2827925	2838177	10253	-	CIL0908S0181
scaffold69904	2875670	2875933	264	strongHyper	0.184	8.49e-18	Distal Intergenic	2827925	2838177	10253	-	CIL0908S0181
scaffold69904	2877793	2878514	722	strongHyper	0.143	4.31e-26	Distal Intergenic	2827925	2838177	10253	-	CIL0908S0181
scaffold69904	2884211	2884251	41	strongHyper	0.119	1.76e-14	Distal Intergenic	2827925	2838177	10253	-	CIL0908S0181
scaffold69904	2886828	2886870	43	strongHyper	0.121	0.000186	Distal Intergenic	2931639	2933334	1696	+	CIL0908S0183
scaffold69904	2910748	2910982	235	strongHyper	0.127	1.32e-06	Distal Intergenic	2931639	2933334	1696	+	CIL0908S0183
scaffold69904	2916156	2916451	296	strongHyper	0.199	4.61e-14	Distal Intergenic	2931639	2933334	1696	+	CIL0908S0183
scaffold69904	2917798	2918052	255	strongHyper	0.103	2.94e-05	Distal Intergenic	2931639	2933334	1696	+	CIL0908S0183
scaffold69904	2959097	2959114	18	strongHyper	0.424	3.16e-12	Distal Intergenic	2954696	2955515	820	+	CIL0908S0184
scaffold69904	3024372	3024557	186	strongHypo	-0.147	0.000243	Distal Intergenic	3060644	3071912	11269	+	CIL0908S0186
scaffold70015	94786	94872	87	strongHypo	-0.266	4.85e-06	Distal Intergenic	80877	81403	527	-	CIL0909S0009
scaffold70015	234996	235054	59	strongHypo	-0.138	3.75e-06	Exon (CIL0909S0016.mRNA/CIL0909S0016, exon 3 of 3)	234966	237157	2192	-	CIL0909S0016
scaffold70015	332343	332357	15	strongHyper	0.268	1.68e-13	Promoter (2-3kb)	323750	329868	6119	-	CIL0909S0025
scaffold70015	339778	339918	141	strongHypo	-0.219	6.97e-12	Intron (CIL0909S0027.mRNA/CIL0909S0027, intron 1 of 3)	338883	342814	3932	-	CIL0909S0027
scaffold70015	357295	357388	94	strongHyper	0.195	9.83e-09	Intron (CIL0909S0029.mRNA/CIL0909S0029, intron 9 of 21)	353359	372831	19473	+	CIL0909S0029
scaffold70015	510522	510910	389	strongHypo	-0.136	0.00269	Intron (CIL0909S0051.mRNA/CIL0909S0051, intron 10 of 18)	503998	522409	18412	+	CIL0909S0051
scaffold70015	544250	544268	19	strongHyper	0.131	4.89e-05	Distal Intergenic	538548	540930	2383	-	CIL0909S0056
scaffold70015	630271	630937	667	strongHypo	-0.171	6.12e-12	Intron (CIL0909S0064.mRNA/CIL0909S0064, intron 4 of 23)	627146	658879	31734	+	CIL0909S0064
scaffold70015	824359	824572	214	strongHypo	-0.202	8.99e-08	Distal Intergenic	809436	811855	2420	-	CIL0909S0073
scaffold70015	908014	908190	177	strongHyper	0.163	0.000439	Intron (CIL0909S0077.mRNA/CIL0909S0077, intron 1 of 9)	906274	914806	8533	+	CIL0909S0077
scaffold70015	947308	947729	422	strongHyper	0.241	9.45e-10	Intron (CIL0909S0079.mRNA/CIL0909S0079, intron 11 of 27)	926882	970690	43809	+	CIL0909S0079
scaffold70015	977356	977660	305	strongHypo	-0.251	2.41e-08	Exon (CIL0909S0081.mRNA/CIL0909S0081, exon 1 of 3)	977333	980755	3423	+	CIL0909S0081
scaffold70015	978315	978736	422	strongHypo	-0.137	4.16e-09	Intron (CIL0909S0081.mRNA/CIL0909S0081, intron 1 of 2)	977333	980755	3423	+	CIL0909S0081
scaffold70015	979166	980316	1151	strongHypo	-0.111	2.6e-11	Exon (CIL0909S0081.mRNA/CIL0909S0081, exon 2 of 3)	977333	980755	3423	+	CIL0909S0081
scaffold70015	992921	993139	219	strongHypo	-0.169	3.11e-05	Distal Intergenic	993163	1001141	7979	-	CIL0909S0083
scaffold70015	993679	993912	234	strongHyper	0.177	2.43e-06	Intron (CIL0909S0083.mRNA/CIL0909S0083, intron 1 of 7)	993163	1001141	7979	-	CIL0909S0083
scaffold70015	998794	998825	32	strongHyper	0.272	4.22e-08	Intron (CIL0909S0083.mRNA/CIL0909S0083, intron 6 of 7)	993163	1001141	7979	-	CIL0909S0083
scaffold70015	1026671	1027006	336	strongHypo	-0.131	0.00351	Distal Intergenic	993163	1001141	7979	-	CIL0909S0083
scaffold70015	1124848	1125082	235	strongHypo	-0.145	1.57e-08	Intron (CIL0909S0089.mRNA/CIL0909S0089, intron 9 of 9)	1113851	1128265	14415	-	CIL0909S0089
scaffold70015	1445680	1445703	24	strongHyper	0.196	6.77e-07	Distal Intergenic	1429175	1429699	525	-	CIL0909S0104
scaffold70015	1496126	1496159	34	strongHypo	-0.23	0.000584	Promoter (2-3kb)	1498941	1502057	3117	+	CIL0909S0105
scaffold70015	1508888	1509050	163	strongHyper	0.214	3.42e-05	Distal Intergenic	1498941	1502057	3117	+	CIL0909S0105
scaffold70015	1518149	1518322	174	strongHypo	-0.212	2.06e-08	Distal Intergenic	1498941	1502057	3117	+	CIL0909S0105
scaffold70015	1600453	1600777	325	strongHypo	-0.103	1.82e-06	Distal Intergenic	1582815	1584547	1733	-	CIL0909S0110
scaffold70015	1618066	1618273	208	strongHyper	0.121	5.98e-08	Distal Intergenic	1629093	1633744	4652	-	CIL0909S0112
scaffold70015	1649333	1649367	35	strongHypo	-0.351	9.22e-06	Distal Intergenic	1629093	1633744	4652	-	CIL0909S0112
scaffold70015	1717099	1717622	524	strongHypo	-0.112	9.61e-09	Distal Intergenic	1733807	1735756	1950	+	CIL0909S0115
scaffold70015	1718716	1718837	122	strongHypo	-0.138	7.73e-07	Distal Intergenic	1733807	1735756	1950	+	CIL0909S0115
scaffold70015	1858180	1858358	179	strongHypo	-0.114	0.0174	Intron (CIL0909S0132.mRNA/CIL0909S0132, intron 6 of 6)	1855656	1858670	3015	-	CIL0909S0132
scaffold70015	1928327	1928858	532	strongHyper	0.213	6.1e-16	Intron (CIL0909S0141.mRNA/CIL0909S0141, intron 7 of 24)	1922315	1949655	27341	+	CIL0909S0141
scaffold70015	1932609	1932644	36	strongHyper	0.213	0.000258	Intron (CIL0909S0141.mRNA/CIL0909S0141, intron 10 of 24)	1922315	1949655	27341	+	CIL0909S0141
scaffold70015	1982638	1982862	225	strongHypo	-0.156	0.0002	Distal Intergenic	1984170	1991563	7394	-	CIL0909S0143
scaffold70015	2007702	2007846	145	strongHypo	-0.156	9.11e-05	Distal Intergenic	1984170	1991563	7394	-	CIL0909S0143
scaffold70015	2065153	2065189	37	strongHyper	0.136	0.000583	Distal Intergenic	2039208	2039786	579	-	CIL0909S0145
scaffold70015	2213128	2213295	168	strongHypo	-0.121	7.85e-06	Exon (CIL0909S0154.mRNA/CIL0909S0154, exon 1 of 4)	2212741	2216324	3584	+	CIL0909S0154
scaffold70015	2245411	2245451	41	strongHyper	0.201	0.000324	Intron (CIL0909S0157.mRNA/CIL0909S0157, intron 12 of 23)	2233555	2259967	26413	-	CIL0909S0157
scaffold70015	2285778	2285926	149	strongHyper	0.197	4.96e-07	Intron (CIL0909S0158.mRNA/CIL0909S0158, intron 10 of 12)	2261910	2290868	28959	-	CIL0909S0158
scaffold70015	2314492	2314866	375	strongHyper	0.1	1.67e-05	Intron (CIL0909S0159.mRNA/CIL0909S0159, intron 9 of 15)	2320428	2322020	1593	+	CIL0909S0160
scaffold70015	2419766	2419851	86	strongHypo	-0.204	5.46e-06	Intron (CIL0909S0169.mRNA/CIL0909S0169, intron 1 of 1)	2419716	2422550	2835	-	CIL0909S0169
scaffold70015	2426161	2426309	149	strongHypo	-0.194	2.15e-06	Distal Intergenic	2419716	2422550	2835	-	CIL0909S0169
scaffold70015	2442187	2442246	60	strongHyper	0.199	2.75e-05	Intron (CIL0909S0172.mRNA/CIL0909S0172, intron 9 of 23)	2435734	2476250	40517	+	CIL0909S0172
scaffold70015	2653437	2653546	110	strongHyper	0.349	7.56e-10	Intron (CIL0909S0195.mRNA/CIL0909S0195, intron 14 of 17)	2625686	2656084	30399	-	CIL0909S0195
scaffold70015	2654227	2654237	11	strongHypo	-0.229	5.25e-08	Intron (CIL0909S0195.mRNA/CIL0909S0195, intron 14 of 17)	2625686	2656084	30399	-	CIL0909S0195
scaffold70015	2657292	2657417	126	strongHyper	0.102	2.52e-08	Promoter (1-2kb)	2625686	2656084	30399	-	CIL0909S0195
scaffold70015	2685612	2685792	181	strongHypo	-0.152	1.24e-05	Promoter (1-2kb)	2670293	2684663	14371	-	CIL0909S0198
scaffold70015	2736659	2736699	41	strongHypo	-0.217	6.15e-07	Distal Intergenic	2725229	2729142	3914	-	CIL0909S0205
scaffold70015	2796346	2796476	131	strongHypo	-0.156	0.000572	Intron (CIL0909S0210.mRNA/CIL0909S0210, intron 12 of 13)	2766959	2800623	33665	-	CIL0909S0210
scaffold70015	2822654	2822723	70	strongHypo	-0.308	6.16e-07	Intron (CIL0909S0213.mRNA/CIL0909S0213, intron 5 of 9)	2816804	2829426	12623	-	CIL0909S0213
scaffold70015	2835481	2835855	375	strongHyper	0.127	9.59e-05	Intron (CIL0909S0214.mRNA/CIL0909S0214, intron 3 of 5)	2832148	2841544	9397	+	CIL0909S0214
scaffold70015	2851868	2851930	63	strongHyper	0.273	5.08e-13	Promoter (<=1kb)	2849887	2851893	2007	-	CIL0909S0216
scaffold70015	3027958	3028188	231	strongHyper	0.148	3.83e-05	Promoter (<=1kb)	3028457	3029136	680	+	CIL0909S0234
scaffold70015	3091726	3091864	139	strongHypo	-0.146	1.56e-05	Exon (CIL0909S0241.mRNA/CIL0909S0241, exon 1 of 1)	3091349	3094306	2958	-	CIL0909S0241
scaffold70126	30738	30998	261	strongHypo	-0.165	1.68e-05	Distal Intergenic	22881	23468	588	-	CIL0912S0001
scaffold70126	185181	185257	77	strongHypo	-0.21	0.000143	Distal Intergenic	230230	241500	11271	-	CIL0912S0012
scaffold70126	288819	288888	70	strongHypo	-0.184	0.00118	Distal Intergenic	292153	298349	6197	+	CIL0912S0015
scaffold70126	346753	346880	128	strongHypo	-0.402	2.47e-34	Distal Intergenic	330137	331627	1491	+	CIL0912S0018
scaffold70126	540298	540475	178	strongHypo	-0.17	0.000105	Intron (CIL0912S0034.mRNA/CIL0912S0034, intron 4 of 13)	538488	556878	18391	+	CIL0912S0034
scaffold70126	619131	619188	58	strongHyper	0.133	1.04e-05	Exon (CIL0912S0043.mRNA/CIL0912S0043, exon 1 of 2)	618957	621751	2795	+	CIL0912S0043
scaffold70126	697123	697306	184	strongHypo	-0.139	0.0136	Intron (CIL0912S0054.mRNA/CIL0912S0054, intron 13 of 17)	688393	706113	17721	-	CIL0912S0054
scaffold70126	702575	702600	26	strongHyper	0.185	1.71e-05	Intron (CIL0912S0054.mRNA/CIL0912S0054, intron 13 of 17)	688393	706113	17721	-	CIL0912S0054
scaffold70126	752785	752857	73	strongHyper	0.174	0.00594	Intron (CIL0912S0059.mRNA/CIL0912S0059, intron 21 of 39)	742247	763456	21210	+	CIL0912S0059
scaffold70126	789310	789517	208	strongHyper	0.198	5.19e-06	Intron (CIL0912S0061.mRNA/CIL0912S0061, intron 10 of 12)	777667	801720	24054	-	CIL0912S0061
scaffold70126	793954	794111	158	strongHypo	-0.213	0.000156	Intron (CIL0912S0061.mRNA/CIL0912S0061, intron 10 of 12)	777667	801720	24054	-	CIL0912S0061
scaffold70126	924718	924858	141	strongHyper	0.16	1.22e-08	Intron (CIL0912S0072.mRNA/CIL0912S0072, intron 6 of 7)	917340	927497	10158	-	CIL0912S0072
scaffold70126	939818	939873	56	strongHypo	-0.17	0.000311	Intron (CIL0912S0074.mRNA/CIL0912S0074, intron 10 of 16)	933150	943388	10239	-	CIL0912S0074
scaffold70126	1033472	1033575	104	strongHyper	0.161	6.14e-09	Distal Intergenic	1020378	1021202	825	-	CIL0912S0080
scaffold70126	1063296	1063336	41	strongHyper	0.286	1.35e-05	Distal Intergenic	1071840	1088867	17028	-	CIL0912S0082
scaffold70126	1201257	1201357	101	strongHypo	-0.205	0.00469	Distal Intergenic	1227829	1231091	3263	+	CIL0912S0089
scaffold70126	1217194	1217244	51	strongHyper	0.285	4.34e-05	Distal Intergenic	1227829	1231091	3263	+	CIL0912S0089
scaffold70126	1321815	1321966	152	strongHyper	0.155	0.000434	Intron (CIL0912S0094.mRNA/CIL0912S0094, intron 11 of 18)	1307917	1334374	26458	-	CIL0912S0094
scaffold70126	1322474	1322648	175	strongHypo	-0.179	1.94e-05	Intron (CIL0912S0094.mRNA/CIL0912S0094, intron 11 of 18)	1307917	1334374	26458	-	CIL0912S0094
scaffold70126	1440285	1440323	39	strongHypo	-0.362	1.1e-08	Intron (CIL0912S0106.mRNA/CIL0912S0106, intron 7 of 12)	1425438	1461531	36094	-	CIL0912S0106
scaffold70126	1478287	1478554	268	strongHyper	0.15	0.000118	Intron (CIL0912S0107.mRNA/CIL0912S0107, intron 8 of 13)	1472058	1488387	16330	+	CIL0912S0107
scaffold70126	1483408	1483418	11	strongHyper	0.214	2.35e-10	Intron (CIL0912S0107.mRNA/CIL0912S0107, intron 9 of 13)	1472058	1488387	16330	+	CIL0912S0107
scaffold70126	1565973	1566011	39	strongHypo	-0.281	3.04e-09	Distal Intergenic	1624789	1625987	1199	-	CIL0912S0111
scaffold70126	1680686	1680792	107	strongHyper	0.149	1.43e-06	Exon (CIL0912S0117.mRNA/CIL0912S0117, exon 3 of 8)	1679268	1683261	3994	+	CIL0912S0117
scaffold70126	2110745	2111019	275	strongHyper	0.146	6.19e-06	Intron (CIL0912S0157.mRNA/CIL0912S0157, intron 3 of 4)	2105513	2113090	7578	-	CIL0912S0157
scaffold70126	2185179	2185194	16	strongHypo	-0.314	1.33e-08	Distal Intergenic	2170432	2171955	1524	+	CIL0912S0160
scaffold70126	2193239	2193311	73	strongHypo	-0.174	3.63e-05	Intron (CIL0912S0161.mRNA/CIL0912S0161, intron 7 of 12)	2187487	2208946	21460	-	CIL0912S0161
scaffold70126	2195918	2195990	73	strongHypo	-0.167	2.13e-05	Intron (CIL0912S0161.mRNA/CIL0912S0161, intron 7 of 12)	2187487	2208946	21460	-	CIL0912S0161
scaffold70126	2221427	2221666	240	strongHyper	0.131	6.96e-05	Exon (CIL0912S0163.mRNA/CIL0912S0163, exon 4 of 13)	2219268	2231100	11833	+	CIL0912S0163
scaffold70126	2231245	2231448	204	strongHyper	0.146	3.91e-07	Distal Intergenic	2233968	2236012	2045	-	CIL0912S0164
scaffold70126	2243679	2243856	178	strongHyper	0.163	6.55e-10	Intron (CIL0912S0165.mRNA/CIL0912S0165, intron 12 of 17)	2237458	2247045	9588	-	CIL0912S0165
scaffold70126	2313940	2314418	479	strongHyper	0.112	0.0027	Distal Intergenic	2320336	2326346	6011	+	CIL0912S0168
scaffold70126	2321708	2321731	24	strongHyper	0.267	9.98e-16	Intron (CIL0912S0168.mRNA/CIL0912S0168, intron 1 of 2)	2320336	2326346	6011	+	CIL0912S0168
scaffold70126	2327233	2327418	186	strongHypo	-0.106	0.00011	Distal Intergenic	2332502	2335149	2648	+	CIL0912S0169
scaffold70126	2331676	2331881	206	strongHypo	-0.17	3.34e-22	Promoter (<=1kb)	2332502	2335149	2648	+	CIL0912S0169
scaffold70126	2440767	2440812	46	strongHyper	0.298	6.87e-12	Promoter (<=1kb)	2441358	2450392	9035	+	CIL0912S0179
scaffold70126	2572729	2572873	145	strongHyper	0.105	1.76e-05	Distal Intergenic	2560426	2567730	7305	+	CIL0912S0187
scaffold70126	2584698	2584804	107	strongHyper	0.308	0.000146	Distal Intergenic	2560426	2567730	7305	+	CIL0912S0187
scaffold70126	2710703	2710987	285	strongHyper	0.185	0.00011	Distal Intergenic	2718205	2744944	26740	+	CIL0912S0192
scaffold70126	2793355	2793409	55	strongHypo	-0.228	1.65e-05	Distal Intergenic	2798136	2811790	13655	-	CIL0912S0194
scaffold70237	130634	130820	187	strongHyper	0.193	8.47e-09	Intron (CIL0914S0005.mRNA/CIL0914S0005, intron 14 of 47)	80793	85552	4760	+	CIL0914S0004
scaffold70237	155063	155140	78	strongHypo	-0.322	1e-05	Intron (CIL0914S0005.mRNA/CIL0914S0005, intron 34 of 47)	100881	194289	93409	-	CIL0914S0005
scaffold70237	191119	191191	73	strongHyper	0.278	4.44e-08	Intron (CIL0914S0005.mRNA/CIL0914S0005, intron 42 of 47)	100881	194289	93409	-	CIL0914S0005
scaffold70237	387730	387973	244	strongHypo	-0.166	0.000229	Distal Intergenic	389004	394672	5669	-	CIL0914S0013
scaffold70237	419365	419618	254	strongHyper	0.286	1.39e-12	Distal Intergenic	430893	435552	4660	+	CIL0914S0014
scaffold70237	627072	627199	128	strongHypo	-0.336	1.13e-06	Distal Intergenic	597173	600123	2951	+	CIL0914S0020
scaffold70237	666989	667000	12	strongHyper	0.108	0.00017	Exon (CIL0914S0021.mRNA/CIL0914S0021, exon 11 of 13)	672177	674491	2315	-	CIL0914S0022
scaffold70237	736224	736488	265	strongHypo	-0.134	0.00242	Intron (CIL0914S0029.mRNA/CIL0914S0029, intron 5 of 23)	728105	769749	41645	+	CIL0914S0029
scaffold70237	839581	839823	243	strongHypo	-0.272	1.15e-12	Distal Intergenic	798994	829616	30623	-	CIL0914S0034
scaffold70237	990403	990452	50	strongHypo	-0.195	2.27e-05	Distal Intergenic	968770	974978	6209	+	CIL0914S0049
scaffold70237	1017845	1017861	17	strongHypo	-0.203	1.69e-08	Intron (CIL0914S0051.mRNA/CIL0914S0051, intron 6 of 20)	1015344	1027999	12656	+	CIL0914S0051
scaffold70237	1044144	1044243	100	strongHypo	-0.166	0.00141	Intron (CIL0914S0053.mRNA/CIL0914S0053, intron 1 of 1)	1041708	1044991	3284	+	CIL0914S0053
scaffold70237	1127464	1127483	20	strongHypo	-0.207	0.000155	Distal Intergenic	1097085	1116515	19431	-	CIL0914S0057
scaffold70237	1189168	1189197	30	strongHypo	-0.234	5.32e-07	Distal Intergenic	1097085	1116515	19431	-	CIL0914S0057
scaffold70237	1208729	1209200	472	strongHyper	0.131	5.53e-07	Distal Intergenic	1265744	1275104	9361	-	CIL0914S0064
scaffold70237	1234627	1234878	252	strongHypo	-0.172	3.63e-14	Distal Intergenic	1265744	1275104	9361	-	CIL0914S0064
scaffold70237	1341102	1341215	114	strongHypo	-0.124	0.000114	Distal Intergenic	1346007	1349075	3069	+	CIL0914S0068
scaffold70237	1534262	1534654	393	strongHypo	-0.268	1.84e-28	Distal Intergenic	1519715	1521034	1320	-	CIL0914S0081
scaffold70237	1574175	1574279	105	strongHypo	-0.155	0.000196	Distal Intergenic	1589350	1591239	1890	+	CIL0914S0087
scaffold70237	1629767	1630055	289	strongHypo	-0.111	8.23e-05	Promoter (1-2kb)	1624638	1629012	4375	-	CIL0914S0091
scaffold70237	1633303	1633324	22	strongHyper	0.383	3.77e-06	Distal Intergenic	1624638	1629012	4375	-	CIL0914S0091
scaffold70237	1650305	1650745	441	strongHyper	0.308	3.05e-14	Distal Intergenic	1656357	1660607	4251	+	CIL0914S0092
scaffold70237	1713286	1713427	142	strongHyper	0.1	1.09e-05	Intron (CIL0914S0096.mRNA/CIL0914S0096, intron 2 of 11)	1704121	1709078	4958	+	CIL0914S0095
scaffold70237	1731948	1732167	220	strongHypo	-0.164	0.000526	Distal Intergenic	1712448	1725383	12936	-	CIL0914S0096
scaffold70237	1778720	1778748	29	strongHypo	-0.169	0.0442	Distal Intergenic	1761322	1763889	2568	+	CIL0914S0099
scaffold70237	2157645	2157695	51	strongHypo	-0.193	3.4e-06	Distal Intergenic	2149315	2152580	3266	+	CIL0914S0129
scaffold70237	2407929	2407948	20	strongHyper	0.393	2.75e-06	Intron (CIL0914S0142.mRNA/CIL0914S0142, intron 1 of 1)	2401914	2408006	6093	-	CIL0914S0142
scaffold70237	2409398	2409598	201	strongHyper	0.128	0.00218	Promoter (1-2kb)	2401914	2408006	6093	-	CIL0914S0142
scaffold70237	2436768	2436864	97	strongHyper	0.263	8.99e-06	Distal Intergenic	2418812	2419703	892	-	CIL0914S0143
scaffold70237	2469633	2469785	153	strongHyper	0.15	0.00129	Distal Intergenic	2499148	2503786	4639	+	CIL0914S0145
scaffold70237	2555989	2556302	314	strongHyper	0.185	0.00605	Intron (CIL0914S0148.mRNA/CIL0914S0148, intron 11 of 12)	2543549	2561365	17817	-	CIL0914S0148
scaffold70237	2686301	2686367	67	strongHyper	0.459	1.25e-06	Promoter (1-2kb)	2687858	2692323	4466	+	CIL0914S0153
scaffold70237	2758968	2759103	136	strongHypo	-0.158	1.72e-05	Promoter (2-3kb)	2761103	2839714	78612	+	CIL0914S0154
scaffold70237	2805564	2805590	27	strongHypo	-0.262	0.000611	Intron (CIL0914S0154.mRNA/CIL0914S0154, intron 7 of 12)	2842079	2848118	6040	+	CIL0914S0155
scaffold70237	2808155	2808299	145	strongHypo	-0.18	1.48e-06	Intron (CIL0914S0154.mRNA/CIL0914S0154, intron 7 of 12)	2842079	2848118	6040	+	CIL0914S0155
scaffold70349	11239	11355	117	strongHypo	-0.247	0.00288	Distal Intergenic	44	2329	2286	-	CIL0917S0001
scaffold70349	32390	32430	41	strongHypo	-0.29	2.95e-05	Distal Intergenic	53829	54437	609	-	CIL0917S0002
scaffold70349	94504	94582	79	strongHyper	0.17	2.81e-07	Exon (CIL0917S0007.mRNA/CIL0917S0007, exon 4 of 7)	91338	96356	5019	+	CIL0917S0007
scaffold70349	94915	95072	158	strongHyper	0.139	7.34e-05	Intron (CIL0917S0007.mRNA/CIL0917S0007, intron 4 of 6)	98030	167469	69440	+	CIL0917S0008
scaffold70349	198771	198905	135	strongHyper	0.123	0.0205	Distal Intergenic	221637	226913	5277	-	CIL0917S0011
scaffold70349	301194	301216	23	strongHyper	0.275	1.38e-06	Promoter (2-3kb)	303484	305704	2221	+	CIL0917S0017
scaffold70349	333358	333922	565	strongHypo	-0.319	1.95e-12	Distal Intergenic	303484	305704	2221	+	CIL0917S0017
scaffold70349	345238	345250	13	strongHypo	-0.101	5.62e-10	Distal Intergenic	377934	378376	443	-	CIL0917S0018
scaffold70349	422306	422521	216	strongHyper	0.1	0.00453	Distal Intergenic	415677	417674	1998	-	CIL0917S0020
scaffold70349	562307	562317	11	strongHypo	-0.412	1.56e-09	Distal Intergenic	577566	577955	390	-	CIL0917S0030
scaffold70349	656068	656102	35	strongHyper	0.162	0.000122	Intron (CIL0917S0037.mRNA/CIL0917S0037, intron 7 of 7)	648660	659380	10721	-	CIL0917S0037
scaffold70349	702585	702629	45	strongHypo	-0.219	3.97e-07	Distal Intergenic	672112	678023	5912	-	CIL0917S0039
scaffold70349	904260	904563	304	strongHypo	-0.117	0.00588	Promoter (1-2kb)	900817	903163	2347	-	CIL0917S0062
scaffold70349	1139047	1139137	91	strongHypo	-0.14	0.000304	Intron (CIL0917S0085.mRNA/CIL0917S0085, intron 1 of 1)	1137351	1140722	3372	+	CIL0917S0085
scaffold70349	1439952	1440136	185	strongHypo	-0.14	5.58e-05	Promoter (1-2kb)	1441167	1452377	11211	+	CIL0917S0116
scaffold70349	1728912	1728922	11	strongHyper	0.216	3.3e-05	Distal Intergenic	1730729	1734125	3397	-	CIL0917S0140
scaffold70349	1758806	1758864	59	strongHypo	-0.442	2.5e-12	Intron (CIL0917S0142.mRNA/CIL0917S0142, intron 4 of 6)	1746260	1765627	19368	-	CIL0917S0142
scaffold70349	1795357	1795804	448	strongHypo	-0.108	0.000365	Distal Intergenic	1817948	1820337	2390	+	CIL0917S0144
scaffold70349	1818009	1818238	230	strongHypo	-0.258	1.96e-06	Exon (CIL0917S0144.mRNA/CIL0917S0144, exon 1 of 5)	1817948	1820337	2390	+	CIL0917S0144
scaffold70349	1883146	1883257	112	strongHypo	-0.117	0.00714	Distal Intergenic	1928698	1931114	2417	+	CIL0917S0145
scaffold70349	1890646	1890807	162	strongHyper	0.131	0.00243	Distal Intergenic	1928698	1931114	2417	+	CIL0917S0145
scaffold70349	1892719	1892788	70	strongHypo	-0.143	7.57e-06	Distal Intergenic	1928698	1931114	2417	+	CIL0917S0145
scaffold70349	1916319	1916386	68	strongHyper	0.272	3.14e-06	Distal Intergenic	1928698	1931114	2417	+	CIL0917S0145
scaffold70349	1953645	1953817	173	strongHyper	0.239	1.62e-06	Distal Intergenic	1928698	1931114	2417	+	CIL0917S0145
scaffold70349	2412002	2412118	117	strongHyper	0.189	5.17e-07	Intron (CIL0917S0162.mRNA/CIL0917S0162, intron 4 of 11)	2398349	2402438	4090	-	CIL0917S0161
scaffold70349	2427048	2427364	317	strongHypo	-0.137	0.000611	Intron (CIL0917S0162.mRNA/CIL0917S0162, intron 4 of 11)	2406453	2431813	25361	-	CIL0917S0162
scaffold70349	2455840	2455851	12	strongHyper	0.275	3.36e-07	Intron (CIL0917S0165.mRNA/CIL0917S0165, intron 3 of 3)	2448815	2458037	9223	-	CIL0917S0165
scaffold70349	2535715	2535872	158	strongHypo	-0.22	5.77e-06	Distal Intergenic	2448815	2458037	9223	-	CIL0917S0165
scaffold70460	368976	368984	9	strongHyper	0.426	9.99e-16	Intron (CIL0919S0038.mRNA/CIL0919S0038, intron 2 of 7)	366313	374892	8580	+	CIL0919S0038
scaffold70460	404971	405320	350	strongHypo	-0.165	0.0156	Distal Intergenic	396735	397281	547	+	CIL0919S0042
scaffold70460	406427	407599	1173	strongHypo	-0.264	1.74e-54	Distal Intergenic	415353	416885	1533	+	CIL0919S0043
scaffold70460	408756	408930	175	strongHypo	-0.124	5.72e-07	Distal Intergenic	415353	416885	1533	+	CIL0919S0043
scaffold70460	671223	671318	96	strongHyper	0.18	2.77e-10	Distal Intergenic	672408	673814	1407	-	CIL0919S0062
scaffold70460	736898	737096	199	strongHypo	-0.351	3.71e-10	Distal Intergenic	741586	755134	13549	+	CIL0919S0065
scaffold70460	755410	755491	82	strongHypo	-0.235	2.58e-06	Distal Intergenic	741586	755134	13549	+	CIL0919S0065
scaffold70460	774638	774926	289	strongHypo	-0.124	0.000339	Promoter (2-3kb)	764541	772197	7657	-	CIL0919S0066
scaffold70460	928476	928505	30	strongHypo	-0.204	2.16e-06	Distal Intergenic	984782	985120	339	+	CIL0919S0073
scaffold70460	1001474	1001641	168	strongHypo	-0.182	0.00114	Distal Intergenic	988895	994913	6019	+	CIL0919S0074
scaffold70460	1044363	1044497	135	strongHypo	-0.116	0.00267	Distal Intergenic	1033898	1038126	4229	-	CIL0919S0075
scaffold70460	1199324	1199518	195	strongHypo	-0.164	0.000505	Distal Intergenic	1184477	1195282	10806	-	CIL0919S0079
scaffold70460	1264924	1265016	93	strongHypo	-0.148	0.00115	Promoter (2-3kb)	1267655	1273256	5602	+	CIL0919S0089
scaffold70460	1323810	1323838	29	strongHypo	-0.194	5.65e-07	Exon (CIL0919S0093.mRNA/CIL0919S0093, exon 3 of 18)	1302567	1325892	23326	-	CIL0919S0093
scaffold70460	1410775	1410906	132	strongHypo	-0.114	0.000313	Promoter (2-3kb)	1406969	1408556	1588	-	CIL0919S0107
scaffold70460	1500624	1500669	46	strongHyper	0.342	1.1e-05	Promoter (1-2kb)	1490914	1499270	8357	-	CIL0919S0120
scaffold70460	1545843	1545914	72	strongHyper	0.148	0.00119	Distal Intergenic	1550390	1550959	570	+	CIL0919S0127
scaffold70460	1604923	1605129	207	strongHyper	0.103	0.000131	Intron (CIL0919S0135.mRNA/CIL0919S0135, intron 6 of 10)	1609032	1612256	3225	+	CIL0919S0136
scaffold70460	1768756	1768953	198	strongHyper	0.255	1.87e-07	Distal Intergenic	1773907	1790182	16276	+	CIL0919S0156
scaffold70460	1876444	1876516	73	strongHypo	-0.228	6.86e-06	Intron (CIL0919S0168.mRNA/CIL0919S0168, intron 4 of 7)	1873206	1878280	5075	-	CIL0919S0168
scaffold70460	1911670	1911699	30	strongHyper	0.17	2.56e-06	Intron (CIL0919S0173.mRNA/CIL0919S0173, intron 3 of 4)	1909063	1912969	3907	-	CIL0919S0173
scaffold70460	2062664	2062673	10	strongHyper	0.328	1.12e-06	Distal Intergenic	2030947	2036806	5860	-	CIL0919S0186
scaffold70460	2169277	2169570	294	strongHypo	-0.148	8.92e-07	Distal Intergenic	2217642	2224466	6825	+	CIL0919S0194
scaffold70460	2339415	2339623	209	strongHyper	0.109	0.00167	Intron (CIL0919S0195.mRNA/CIL0919S0195, intron 5 of 14)	2346207	2349749	3543	-	CIL0919S0196
scaffold70460	2340748	2340902	155	strongHypo	-0.172	5.9e-07	Intron (CIL0919S0195.mRNA/CIL0919S0195, intron 5 of 14)	2346207	2349749	3543	-	CIL0919S0196
scaffold70460	2410771	2410815	45	strongHypo	-0.276	2.47e-05	Intron (CIL0919S0200.mRNA/CIL0919S0200, intron 6 of 9)	2400691	2417235	16545	-	CIL0919S0200
scaffold70460	2657878	2658014	137	strongHyper	0.23	8.02e-07	Promoter (<=1kb)	2657892	2661055	3164	+	CIL0919S0213
scaffold70460	2706324	2706533	210	strongHyper	0.15	0.00194	Intron (CIL0919S0215.mRNA/CIL0919S0215, intron 8 of 24)	2687767	2724918	37152	+	CIL0919S0215
scaffold70460	2707582	2708034	453	strongHyper	0.124	1.18e-05	Intron (CIL0919S0215.mRNA/CIL0919S0215, intron 8 of 24)	2687767	2724918	37152	+	CIL0919S0215
scaffold70460	2717268	2717334	67	strongHyper	0.217	1.02e-10	Intron (CIL0919S0215.mRNA/CIL0919S0215, intron 19 of 24)	2687767	2724918	37152	+	CIL0919S0215
scaffold70460	2719009	2719173	165	strongHypo	-0.105	9.65e-05	Intron (CIL0919S0215.mRNA/CIL0919S0215, intron 19 of 24)	2687767	2724918	37152	+	CIL0919S0215
scaffold70460	2914544	2914880	337	strongHyper	0.165	1.32e-06	Intron (CIL0919S0229.mRNA/CIL0919S0229, intron 5 of 11)	2911172	2931790	20619	+	CIL0919S0229
scaffold70460	2915543	2915899	357	strongHypo	-0.101	0.00157	Intron (CIL0919S0229.mRNA/CIL0919S0229, intron 5 of 11)	2911172	2931790	20619	+	CIL0919S0229
scaffold70460	2917190	2917276	87	strongHyper	0.133	5.73e-05	Intron (CIL0919S0229.mRNA/CIL0919S0229, intron 5 of 11)	2911172	2931790	20619	+	CIL0919S0229
scaffold70460	2936362	2936467	106	strongHypo	-0.226	0.000364	Distal Intergenic	2960252	2985516	25265	+	CIL0919S0230
scaffold70460	2979000	2979353	354	strongHyper	0.188	3.01e-09	Intron (CIL0919S0230.mRNA/CIL0919S0230, intron 8 of 10)	2960252	2985516	25265	+	CIL0919S0230
scaffold70460	2980504	2980542	39	strongHyper	0.277	8.5e-07	Intron (CIL0919S0230.mRNA/CIL0919S0230, intron 8 of 10)	2960252	2985516	25265	+	CIL0919S0230
scaffold70682	7741	7935	195	strongHypo	-0.129	0.026	Distal Intergenic	47865	50258	2394	+	CIL0921S0001
scaffold70682	59046	59090	45	strongHyper	0.127	0.0206	Distal Intergenic	56159	57687	1529	+	CIL0921S0002
scaffold70682	168756	168916	161	strongHypo	-0.232	0.000617	Distal Intergenic	144834	155925	11092	+	CIL0921S0008
scaffold70682	279606	279822	217	strongHypo	-0.137	0.0115	Distal Intergenic	296858	318442	21585	+	CIL0921S0013
scaffold70682	280635	280707	73	strongHypo	-0.33	4.88e-12	Distal Intergenic	296858	318442	21585	+	CIL0921S0013
scaffold70682	298588	299332	745	strongHyper	0.1	1.13e-27	Intron (CIL0921S0013.mRNA/CIL0921S0013, intron 1 of 9)	296858	318442	21585	+	CIL0921S0013
scaffold70682	393497	393791	295	strongHypo	-0.14	0.00129	Distal Intergenic	386057	388893	2837	-	CIL0921S0018
scaffold70682	492532	492844	313	strongHypo	-0.115	2.85e-06	Promoter (2-3kb)	487478	490262	2785	-	CIL0921S0023
scaffold70682	507204	507346	143	strongHypo	-0.335	7.5e-13	Distal Intergenic	518288	519483	1196	-	CIL0921S0024
scaffold70682	570140	570263	124	strongHyper	0.142	9.48e-05	Distal Intergenic	551703	556329	4627	-	CIL0921S0027
scaffold70682	623251	623269	19	strongHyper	0.215	0.000447	Distal Intergenic	640145	640372	228	-	CIL0921S0031
scaffold70682	826113	826394	282	strongHypo	-0.122	0.000497	Distal Intergenic	830627	846260	15634	+	CIL0921S0040
scaffold70682	835519	835758	240	strongHypo	-0.157	0.000171	Intron (CIL0921S0040.mRNA/CIL0921S0040, intron 2 of 9)	830627	846260	15634	+	CIL0921S0040
scaffold70682	881958	881990	33	strongHypo	-0.421	1.57e-11	Distal Intergenic	932015	932548	534	+	CIL0921S0044
scaffold70682	896565	896588	24	strongHyper	0.173	0.000224	Distal Intergenic	932015	932548	534	+	CIL0921S0044
scaffold70682	1011528	1011555	28	strongHyper	0.219	8.09e-07	Distal Intergenic	1077884	1082853	4970	+	CIL0921S0045
scaffold70682	1062725	1062870	146	strongHyper	0.135	4.29e-05	Distal Intergenic	1077884	1082853	4970	+	CIL0921S0045
scaffold70682	1149625	1149660	36	strongHypo	-0.265	1.12e-07	Distal Intergenic	1136977	1137378	402	+	CIL0921S0050
scaffold70682	1321312	1321452	141	strongHyper	0.197	0.00143	Distal Intergenic	1316906	1320041	3136	+	CIL0921S0064
scaffold70682	1342031	1342443	413	strongHyper	0.191	1.43e-12	Distal Intergenic	1332718	1335721	3004	-	CIL0921S0065
scaffold70682	1464540	1464661	122	strongHypo	-0.279	2.36e-12	Intron (CIL0921S0075.mRNA/CIL0921S0075, intron 8 of 11)	1459460	1468975	9516	-	CIL0921S0075
scaffold70682	1522553	1522616	64	strongHyper	0.226	7.12e-05	Distal Intergenic	1520690	1521729	1040	+	CIL0921S0079
scaffold70682	1538227	1538402	176	strongHyper	0.203	1.21e-14	Distal Intergenic	1535121	1536090	970	+	CIL0921S0081
scaffold70682	1545589	1545633	45	strongHyper	0.211	0.000105	3' UTR	1545352	1548518	3167	-	CIL0921S0082
scaffold70682	1546328	1546404	77	strongHyper	0.245	0.000722	Exon (CIL0921S0082.mRNA/CIL0921S0082, exon 4 of 6)	1545352	1548518	3167	-	CIL0921S0082
scaffold70682	1563827	1563906	80	strongHypo	-0.105	0.00312	Distal Intergenic	1545352	1548518	3167	-	CIL0921S0082
scaffold70682	1668654	1668931	278	strongHyper	0.11	0.000114	Distal Intergenic	1675652	1677624	1973	-	CIL0921S0092
scaffold70682	1728607	1728666	60	strongHypo	-0.197	7.67e-05	Distal Intergenic	1726461	1727093	633	+	CIL0921S0096
scaffold70682	1801047	1801067	21	strongHyper	0.246	0.000112	Exon (CIL0921S0099.mRNA/CIL0921S0099, exon 1 of 4)	1788264	1801384	13121	-	CIL0921S0099
scaffold70682	1807372	1807406	35	strongHyper	0.456	1.59e-09	Distal Intergenic	1788264	1801384	13121	-	CIL0921S0099
scaffold70682	1846886	1847077	192	strongHyper	0.151	4.13e-07	Distal Intergenic	1788264	1801384	13121	-	CIL0921S0099
scaffold70682	1857260	1857302	43	strongHypo	-0.259	0.000198	Distal Intergenic	1866919	1901786	34868	-	CIL0921S0100
scaffold70682	1994150	1994160	11	strongHypo	-0.144	1.47e-06	Distal Intergenic	1986133	1988761	2629	+	CIL0921S0102
scaffold70682	2049303	2049595	293	strongHyper	0.262	1.17e-06	Distal Intergenic	2081415	2083408	1994	-	CIL0921S0105
scaffold70682	2120239	2120253	15	strongHypo	-0.353	1.4e-13	Distal Intergenic	2113219	2115891	2673	+	CIL0921S0108
scaffold70682	2243832	2243928	97	strongHyper	0.192	0.00599	Intron (CIL0921S0113.mRNA/CIL0921S0113, intron 15 of 18)	2193901	2331730	137830	+	CIL0921S0113
scaffold70682	2274715	2274774	60	strongHypo	-0.345	1.65e-07	Intron (CIL0921S0113.mRNA/CIL0921S0113, intron 15 of 18)	2193901	2331730	137830	+	CIL0921S0113
scaffold70682	2299171	2299222	52	strongHypo	-0.238	0.000474	Intron (CIL0921S0113.mRNA/CIL0921S0113, intron 15 of 18)	2380939	2385496	4558	+	CIL0921S0116
scaffold70682	2319065	2319317	253	strongHyper	0.108	0.00171	Intron (CIL0921S0113.mRNA/CIL0921S0113, intron 15 of 18)	2380939	2385496	4558	+	CIL0921S0116
scaffold70682	2378435	2378550	116	strongHyper	0.216	1.55e-06	Promoter (2-3kb)	2380939	2385496	4558	+	CIL0921S0116
scaffold70682	2382760	2382768	9	strongHyper	0.251	1.81e-09	Exon (CIL0921S0116.mRNA/CIL0921S0116, exon 3 of 5)	2380939	2385496	4558	+	CIL0921S0116
scaffold70682	2399787	2399896	110	strongHypo	-0.109	0.0147	Intron (CIL0921S0117.mRNA/CIL0921S0117, intron 1 of 5)	2391303	2401378	10076	-	CIL0921S0117
scaffold70682	2426411	2426530	120	strongHypo	-0.233	4.28e-08	Intron (CIL0921S0119.mRNA/CIL0921S0119, intron 1 of 6)	2422844	2457726	34883	+	CIL0921S0119
scaffold70682	2433780	2434022	243	strongHypo	-0.109	0.0306	Intron (CIL0921S0119.mRNA/CIL0921S0119, intron 2 of 6)	2422844	2457726	34883	+	CIL0921S0119
scaffold70682	2458278	2458559	282	strongHyper	0.11	0.000277	Distal Intergenic	2462209	2472600	10392	+	CIL0921S0120
scaffold70682	2483109	2483212	104	strongHypo	-0.192	6.98e-12	Intron (CIL0921S0121.mRNA/CIL0921S0121, intron 8 of 14)	2473193	2497341	24149	-	CIL0921S0121
scaffold70682	2493773	2494023	251	strongHypo	-0.144	2.74e-05	Exon (CIL0921S0121.mRNA/CIL0921S0121, exon 4 of 15)	2473193	2497341	24149	-	CIL0921S0121
scaffold70682	2616415	2616505	91	strongHyper	0.125	9.55e-05	Distal Intergenic	2625649	2627635	1987	+	CIL0921S0125
scaffold70682	2841616	2841646	31	strongHyper	0.244	2.95e-07	Distal Intergenic	2853906	2861357	7452	-	CIL0921S0137
scaffold70682	2874653	2874706	54	strongHypo	-0.159	0.000315	Distal Intergenic	2880677	2889734	9058	+	CIL0921S0139
scaffold70682	2894380	2894512	133	strongHypo	-0.13	0.000676	Distal Intergenic	2897555	2905888	8334	-	CIL0921S0140
scaffold70682	2939464	2939492	29	strongHypo	-0.181	1.51e-05	Distal Intergenic	2934203	2935095	893	-	CIL0921S0141
scaffold70682	3010185	3010230	46	strongHyper	0.227	5.32e-06	Promoter (1-2kb)	2996577	3008534	11958	-	CIL0921S0149
scaffold70682	3020295	3020442	148	strongHyper	0.24	1.09e-06	Distal Intergenic	2996577	3008534	11958	-	CIL0921S0149
scaffold70793	24787	25096	310	strongHyper	0.206	1.6e-09	Distal Intergenic	38707	38916	210	+	CIL0922S0002
scaffold70793	196258	196293	36	strongHypo	-0.328	4.73e-06	Promoter (1-2kb)	197316	197936	621	+	CIL0922S0016
scaffold70793	511354	511456	103	strongHypo	-0.328	2.62e-06	Distal Intergenic	493797	496405	2609	-	CIL0922S0042
scaffold70793	546307	546438	132	strongHyper	0.365	6.13e-07	Distal Intergenic	547712	552987	5276	-	CIL0922S0047
scaffold70793	766976	767394	419	strongHypo	-0.173	2.56e-08	Distal Intergenic	840982	842409	1428	+	CIL0922S0054
scaffold70793	923177	923240	64	strongHypo	-0.136	8.35e-06	Intron (CIL0922S0065.mRNA/CIL0922S0065, intron 6 of 12)	911642	914949	3308	-	CIL0922S0064
scaffold70793	1012779	1012822	44	strongHyper	0.231	5.9e-09	Distal Intergenic	1009786	1011705	1920	+	CIL0922S0076
scaffold70793	1383359	1383487	129	strongHypo	-0.203	0.00029	Distal Intergenic	1372510	1380074	7565	-	CIL0922S0122
scaffold70793	1443588	1443772	185	strongHyper	0.155	0.000117	Intron (CIL0922S0133.mRNA/CIL0922S0133, intron 1 of 1)	1441987	1446619	4633	+	CIL0922S0133
scaffold70793	1444810	1445146	337	strongHyper	0.117	1.44e-11	Intron (CIL0922S0133.mRNA/CIL0922S0133, intron 1 of 1)	1441987	1446619	4633	+	CIL0922S0133
scaffold70793	1738946	1738973	28	strongHyper	0.369	1.19e-10	Promoter (1-2kb)	1733567	1737234	3668	-	CIL0922S0176
scaffold70793	1742921	1742954	34	strongHyper	0.338	6.14e-16	Distal Intergenic	1733567	1737234	3668	-	CIL0922S0176
scaffold70793	1805405	1805793	389	strongHyper	0.13	2.73e-09	Exon (CIL0922S0188.mRNA/CIL0922S0188, exon 6 of 13)	1801831	1807663	5833	-	CIL0922S0188
scaffold70793	1846814	1847205	392	strongHyper	0.106	4.3e-06	Intron (CIL0922S0191.mRNA/CIL0922S0191, intron 1 of 4)	1844237	1844659	423	+	CIL0922S0190
scaffold70793	1942584	1942613	30	strongHyper	0.216	1.13e-11	Intron (CIL0922S0206.mRNA/CIL0922S0206, intron 7 of 8)	1937291	1946653	9363	-	CIL0922S0206
scaffold70793	2008495	2008717	223	strongHyper	0.146	8.05e-05	Distal Intergenic	2011824	2014320	2497	+	CIL0922S0209
scaffold70793	2079379	2079407	29	strongHypo	-0.167	3.33e-06	Distal Intergenic	2094919	2098854	3936	+	CIL0922S0215
scaffold70793	2189289	2189391	103	strongHyper	0.185	0.000198	Distal Intergenic	2194335	2201110	6776	+	CIL0922S0218
scaffold70793	2214535	2214572	38	strongHypo	-0.246	5.29e-06	Promoter (<=1kb)	2211796	2213631	1836	-	CIL0922S0219
scaffold70793	2373481	2373608	128	strongHypo	-0.114	0.000242	Distal Intergenic	2376134	2383872	7739	-	CIL0922S0228
scaffold70793	2606553	2606583	31	strongHyper	0.102	5.17e-05	Distal Intergenic	2611324	2617560	6237	-	CIL0922S0241
scaffold70793	2630873	2630903	31	strongHyper	0.15	0.000828	Distal Intergenic	2611324	2617560	6237	-	CIL0922S0241
scaffold70793	2678303	2678663	361	strongHypo	-0.183	0.000495	Distal Intergenic	2671173	2674978	3806	-	CIL0922S0242
scaffold70793	2720878	2720928	51	strongHypo	-0.32	2.91e-08	Distal Intergenic	2671173	2674978	3806	-	CIL0922S0242
scaffold70793	2857111	2857239	129	strongHyper	0.181	2e-05	Intron (CIL0922S0246.mRNA/CIL0922S0246, intron 4 of 12)	2846272	2862419	16148	-	CIL0922S0246
scaffold70793	3006937	3007045	109	strongHypo	-0.154	0.000249	Intron (CIL0922S0254.mRNA/CIL0922S0254, intron 2 of 7)	3002844	3014880	12037	-	CIL0922S0254
scaffold70793	3060916	3060943	28	strongHypo	-0.121	0.000862	Distal Intergenic	3073038	3074372	1335	-	CIL0922S0258
scaffold70904	29464	30050	587	strongHypo	-0.118	2.34e-11	Intron (CIL0923S0003.mRNA/CIL0923S0003, intron 4 of 19)	18196	24021	5826	+	CIL0923S0002
scaffold70904	30409	30736	328	strongHypo	-0.14	1.32e-07	Intron (CIL0923S0003.mRNA/CIL0923S0003, intron 4 of 19)	18196	24021	5826	+	CIL0923S0002
scaffold70904	32536	32652	117	strongHyper	0.195	0.000156	Intron (CIL0923S0003.mRNA/CIL0923S0003, intron 4 of 19)	24590	43369	18780	-	CIL0923S0003
scaffold70904	126769	127051	283	strongHyper	0.122	0.00916	Intron (CIL0923S0012.mRNA/CIL0923S0012, intron 1 of 6)	124860	130617	5758	+	CIL0923S0012
scaffold70904	185039	185315	277	strongHypo	-0.123	0.00363	Intron (CIL0923S0019.mRNA/CIL0923S0019, intron 2 of 5)	173176	190841	17666	+	CIL0923S0019
scaffold70904	186547	186555	9	strongHyper	0.185	0.00141	Intron (CIL0923S0019.mRNA/CIL0923S0019, intron 2 of 5)	173176	190841	17666	+	CIL0923S0019
scaffold70904	226515	226725	211	strongHypo	-0.25	3.13e-16	Intron (CIL0923S0021.mRNA/CIL0923S0021, intron 5 of 12)	217510	234255	16746	-	CIL0923S0021
scaffold70904	328915	328982	68	strongHyper	0.154	0.00169	Distal Intergenic	327005	327612	608	+	CIL0923S0034
scaffold70904	363025	363200	176	strongHyper	0.119	0.0204	Promoter (1-2kb)	365011	366715	1705	+	CIL0923S0040
scaffold70904	535614	535624	11	strongHypo	-0.283	3.32e-10	Intron (CIL0923S0062.mRNA/CIL0923S0062, intron 2 of 6)	524482	563509	39028	+	CIL0923S0062
scaffold70904	596493	596513	21	strongHyper	0.19	0.00529	Distal Intergenic	601776	607624	5849	+	CIL0923S0066
scaffold70904	1091525	1091635	111	strongHypo	-0.144	0.00466	Promoter (2-3kb)	1087100	1088816	1717	-	CIL0923S0122
scaffold70904	1382006	1382023	18	strongHypo	-0.211	1.92e-06	Distal Intergenic	1383148	1383831	684	-	CIL0923S0151
scaffold70904	1431381	1431608	228	strongHypo	-0.18	9.01e-09	Distal Intergenic	1431943	1432627	685	-	CIL0923S0155
scaffold70904	1433104	1433530	427	strongHypo	-0.125	0.000179	Promoter (<=1kb)	1431943	1432627	685	-	CIL0923S0155
scaffold70904	1535372	1535554	183	strongHypo	-0.134	5.46e-07	Distal Intergenic	1533080	1534430	1351	+	CIL0923S0171
scaffold70904	1537681	1537724	44	strongHyper	0.219	8.54e-05	Distal Intergenic	1533080	1534430	1351	+	CIL0923S0171
scaffold70904	1549028	1549124	97	strongHyper	0.209	0.000105	Promoter (1-2kb)	1543130	1547501	4372	-	CIL0923S0172
scaffold70904	1588472	1588550	79	strongHyper	0.14	0.000849	Promoter (1-2kb)	1589933	1592648	2716	+	CIL0923S0177
scaffold70904	1708338	1708497	160	strongHyper	0.18	1.85e-05	Intron (CIL0923S0192.mRNA/CIL0923S0192, intron 3 of 5)	1706173	1710254	4082	-	CIL0923S0192
scaffold70904	1765101	1765422	322	strongHyper	0.108	2.22e-07	Intron (CIL0923S0197.mRNA/CIL0923S0197, intron 3 of 11)	1760741	1786999	26259	+	CIL0923S0197
scaffold70904	1919498	1919509	12	strongHyper	0.198	9.5e-08	Promoter (<=1kb)	1913849	1919055	5207	-	CIL0923S0211
scaffold70904	1976272	1976280	9	strongHypo	-0.222	4.64e-05	Distal Intergenic	1974159	1975909	1751	+	CIL0923S0218
scaffold70904	2020823	2020923	101	strongHypo	-0.321	8.53e-05	Promoter (2-3kb)	2014785	2017978	3194	-	CIL0923S0222
scaffold70904	2107436	2107448	13	strongHyper	0.331	9.56e-05	Intron (CIL0923S0233.mRNA/CIL0923S0233, intron 1 of 4)	2083745	2132231	48487	+	CIL0923S0233
scaffold70904	2131545	2131565	21	strongHyper	0.177	2.6e-05	Intron (CIL0923S0233.mRNA/CIL0923S0233, intron 4 of 4)	2132824	2134904	2081	-	CIL0923S0234
scaffold70904	2251767	2251780	14	strongHyper	0.35	6.27e-06	Promoter (2-3kb)	2247754	2249036	1283	-	CIL0923S0244
scaffold70904	2330300	2330731	432	strongHypo	-0.127	2e-05	Intron (CIL0923S0248.mRNA/CIL0923S0248, intron 4 of 6)	2318623	2334041	15419	-	CIL0923S0248
scaffold70904	2331267	2331363	97	strongHyper	0.104	0.0272	Intron (CIL0923S0248.mRNA/CIL0923S0248, intron 4 of 6)	2318623	2334041	15419	-	CIL0923S0248
scaffold70904	2332652	2332661	10	strongHyper	0.361	4.43e-09	Intron (CIL0923S0248.mRNA/CIL0923S0248, intron 6 of 6)	2318623	2334041	15419	-	CIL0923S0248
scaffold70904	2333279	2333648	370	strongHypo	-0.138	3.18e-12	Intron (CIL0923S0248.mRNA/CIL0923S0248, intron 6 of 6)	2318623	2334041	15419	-	CIL0923S0248
scaffold70904	2341200	2341261	62	strongHyper	0.381	1.7e-06	Intron (CIL0923S0249.mRNA/CIL0923S0249, intron 12 of 22)	2318623	2334041	15419	-	CIL0923S0248
scaffold70904	2342943	2343196	254	strongHypo	-0.141	0.00111	Intron (CIL0923S0249.mRNA/CIL0923S0249, intron 12 of 22)	2318623	2334041	15419	-	CIL0923S0248
scaffold70904	2367853	2368137	285	strongHyper	0.268	3.61e-08	Distal Intergenic	2370258	2376078	5821	-	CIL0923S0250
scaffold70904	2368766	2368936	171	strongHyper	0.196	3.65e-13	Distal Intergenic	2370258	2376078	5821	-	CIL0923S0250
scaffold70904	2457885	2458136	252	strongHyper	0.131	5.54e-05	Intron (CIL0923S0255.mRNA/CIL0923S0255, intron 9 of 10)	2415685	2471967	56283	-	CIL0923S0255
scaffold70904	2489375	2489431	57	strongHypo	-0.207	2.22e-05	Promoter (1-2kb)	2490789	2502266	11478	+	CIL0923S0256
scaffold70904	2567019	2567125	107	strongHyper	0.185	1.76e-08	Distal Intergenic	2576480	2587434	10955	+	CIL0923S0265
scaffold70904	2594697	2594876	180	strongHyper	0.132	0.000153	Intron (CIL0923S0267.mRNA/CIL0923S0267, intron 2 of 2)	2587467	2588075	609	+	CIL0923S0266
scaffold70904	2796321	2796367	47	strongHypo	-0.155	0.000229	Distal Intergenic	2812347	2812637	291	-	CIL0923S0273
scaffold70904	2811192	2811510	319	strongHyper	0.154	1.04e-13	Distal Intergenic	2812347	2812637	291	-	CIL0923S0273
scaffold71015	109136	109199	64	strongHypo	-0.287	0.000509	Exon (CIL0925S0012.mRNA/CIL0925S0012, exon 2 of 2)	109014	109497	484	-	CIL0925S0012
scaffold71015	145425	145649	225	strongHypo	-0.251	3.16e-06	Promoter (<=1kb)	142502	144948	2447	-	CIL0925S0016
scaffold71015	195029	195060	32	strongHypo	-0.432	1.33e-05	Distal Intergenic	200668	202127	1460	+	CIL0925S0018
scaffold71015	209162	209459	298	strongHyper	0.164	0.00644	Distal Intergenic	200668	202127	1460	+	CIL0925S0018
scaffold71015	416733	417107	375	strongHyper	0.184	7.78e-12	Promoter (<=1kb)	414966	416909	1944	-	CIL0925S0038
scaffold71015	425077	425225	149	strongHypo	-0.291	0.000148	Promoter (2-3kb)	416969	423070	6102	-	CIL0925S0039
scaffold71015	440407	440478	72	strongHypo	-0.114	0.00023	Distal Intergenic	416969	423070	6102	-	CIL0925S0039
scaffold71015	443439	443786	348	strongHypo	-0.111	0.00329	Distal Intergenic	416969	423070	6102	-	CIL0925S0039
scaffold71015	509802	509911	110	strongHypo	-0.13	0.0436	Distal Intergenic	510954	519851	8898	-	CIL0925S0045
scaffold71015	575059	575134	76	strongHypo	-0.175	1.56e-06	Distal Intergenic	590025	593086	3062	+	CIL0925S0046
scaffold71015	590622	590815	194	strongHypo	-0.307	2.61e-09	Intron (CIL0925S0046.mRNA/CIL0925S0046, intron 1 of 2)	590025	593086	3062	+	CIL0925S0046
scaffold71015	619051	619078	28	strongHyper	0.269	1.03e-07	Distal Intergenic	590025	593086	3062	+	CIL0925S0046
scaffold71015	642585	642632	48	strongHyper	0.373	1.07e-08	Distal Intergenic	590025	593086	3062	+	CIL0925S0046
scaffold71015	645312	645459	148	strongHypo	-0.505	6.11e-13	Distal Intergenic	590025	593086	3062	+	CIL0925S0046
scaffold71015	673229	673418	190	strongHyper	0.195	0.000148	Distal Intergenic	590025	593086	3062	+	CIL0925S0046
scaffold71015	727818	728106	289	strongHypo	-0.173	0.00319	Distal Intergenic	590025	593086	3062	+	CIL0925S0046
scaffold71015	968484	968783	300	strongHypo	-0.158	0.000322	Distal Intergenic	974916	975380	465	+	CIL0925S0059
scaffold71015	1084183	1084369	187	strongHypo	-0.132	0.000808	Intron (CIL0925S0072.mRNA/CIL0925S0072, intron 1 of 5)	1079749	1090839	11091	-	CIL0925S0072
scaffold71015	1127981	1128187	207	strongHyper	0.234	3.59e-09	Intron (CIL0925S0073.mRNA/CIL0925S0073, intron 15 of 17)	1111927	1136839	24913	-	CIL0925S0073
scaffold71015	1269440	1269655	216	strongHyper	0.114	0.0278	Distal Intergenic	1282494	1313440	30947	+	CIL0925S0080
scaffold71015	1295762	1296217	456	strongHyper	0.171	0.00267	Intron (CIL0925S0080.mRNA/CIL0925S0080, intron 3 of 10)	1282494	1313440	30947	+	CIL0925S0080
scaffold71015	1553572	1553849	278	strongHypo	-0.146	0.00256	Distal Intergenic	1536781	1541038	4258	-	CIL0925S0094
scaffold71015	1629440	1629579	140	strongHypo	-0.215	4.77e-09	Distal Intergenic	1631929	1633612	1684	-	CIL0925S0098
scaffold71015	1639624	1639767	144	strongHypo	-0.272	1.77e-09	Distal Intergenic	1631929	1633612	1684	-	CIL0925S0098
scaffold71015	1732031	1732293	263	strongHypo	-0.158	0.000103	Distal Intergenic	1754191	1763032	8842	+	CIL0925S0107
scaffold71015	1842178	1842261	84	strongHypo	-0.14	3.34e-06	Distal Intergenic	1808159	1824155	15997	-	CIL0925S0113
scaffold71015	1973961	1974139	179	strongHypo	-0.226	0.00279	Distal Intergenic	1956818	1959252	2435	-	CIL0925S0117
scaffold71015	2044803	2044909	107	strongHypo	-0.228	1.84e-08	Distal Intergenic	2064131	2067927	3797	+	CIL0925S0120
scaffold71015	2053378	2053470	93	strongHypo	-0.123	6.12e-05	Distal Intergenic	2064131	2067927	3797	+	CIL0925S0120
scaffold71015	2135774	2135965	192	strongHyper	0.163	1.2e-09	Distal Intergenic	2139222	2142370	3149	-	CIL0925S0124
scaffold71015	2136705	2136830	126	strongHypo	-0.135	0.00018	Distal Intergenic	2139222	2142370	3149	-	CIL0925S0124
scaffold71015	2209430	2209446	17	strongHypo	-0.305	1.61e-06	Distal Intergenic	2205962	2207177	1216	+	CIL0925S0129
scaffold71015	2375239	2375606	368	strongHyper	0.12	0.000911	Distal Intergenic	2365736	2367234	1499	-	CIL0925S0141
scaffold71126	264609	264876	268	strongHypo	-0.157	1.88e-07	Distal Intergenic	286601	298122	11522	+	CIL0929S0025
scaffold71126	573928	573943	16	strongHyper	0.194	0.00286	Distal Intergenic	561545	568578	7034	+	CIL0929S0051
scaffold71126	574559	574889	331	strongHypo	-0.179	4.55e-07	Distal Intergenic	561545	568578	7034	+	CIL0929S0051
scaffold71126	616172	616450	279	strongHypo	-0.114	5.95e-08	Distal Intergenic	561545	568578	7034	+	CIL0929S0051
scaffold71126	678051	678104	54	strongHypo	-0.2	3.45e-10	Intron (CIL0929S0053.mRNA/CIL0929S0053, intron 1 of 5)	675385	685364	9980	+	CIL0929S0053
scaffold71126	708358	708402	45	strongHyper	0.145	0.000112	Distal Intergenic	717960	718412	453	+	CIL0929S0054
scaffold71126	777886	778148	263	strongHyper	0.131	6.42e-06	Distal Intergenic	787139	793031	5893	+	CIL0929S0057
scaffold71126	780002	780090	89	strongHyper	0.149	5.45e-06	Distal Intergenic	787139	793031	5893	+	CIL0929S0057
scaffold71126	871010	871181	172	strongHypo	-0.126	4.77e-07	Intron (CIL0929S0069.mRNA/CIL0929S0069, intron 6 of 14)	865714	879720	14007	-	CIL0929S0069
scaffold71126	960577	960646	70	strongHyper	0.246	1.31e-06	Intron (CIL0929S0077.mRNA/CIL0929S0077, intron 1 of 9)	959582	971105	11524	+	CIL0929S0077
scaffold71126	961123	961356	234	strongHyper	0.215	3.14e-07	Intron (CIL0929S0077.mRNA/CIL0929S0077, intron 1 of 9)	959582	971105	11524	+	CIL0929S0077
scaffold71126	1245461	1245550	90	strongHyper	0.139	8.74e-06	Intron (CIL0929S0113.mRNA/CIL0929S0113, intron 7 of 8)	1249728	1255354	5627	+	CIL0929S0114
scaffold71126	1328705	1328712	8	strongHypo	-0.299	4.35e-07	Intron (CIL0929S0125.mRNA/CIL0929S0125, intron 4 of 30)	1319161	1357347	38187	+	CIL0929S0125
scaffold71126	1341455	1341738	284	strongHyper	0.166	0.00015	Intron (CIL0929S0125.mRNA/CIL0929S0125, intron 11 of 30)	1357609	1362842	5234	-	CIL0929S0126
scaffold71126	1358320	1358437	118	strongHypo	-0.191	0.005	Intron (CIL0929S0126.mRNA/CIL0929S0126, intron 1 of 5)	1357609	1362842	5234	-	CIL0929S0126
scaffold71126	1360376	1360640	265	strongHypo	-0.117	7.73e-06	Exon (CIL0929S0126.mRNA/CIL0929S0126, exon 5 of 6)	1357609	1362842	5234	-	CIL0929S0126
scaffold71126	1437244	1437454	211	strongHyper	0.106	2.52e-06	Intron (CIL0929S0139.mRNA/CIL0929S0139, intron 15 of 18)	1429547	1451600	22054	+	CIL0929S0139
scaffold71126	1449258	1449272	15	strongHypo	-0.3	2.1e-05	Intron (CIL0929S0139.mRNA/CIL0929S0139, intron 15 of 18)	1456973	1458487	1515	-	CIL0929S0140
scaffold71126	1516200	1516441	242	strongHypo	-0.143	5.47e-08	Distal Intergenic	1515214	1515777	564	+	CIL0929S0145
scaffold71126	1784345	1784449	105	strongHyper	0.146	0.000109	Intron (CIL0929S0181.mRNA/CIL0929S0181, intron 9 of 28)	1781649	1797341	15693	-	CIL0929S0181
scaffold71126	1784865	1785005	141	strongHyper	0.128	4.16e-07	Intron (CIL0929S0181.mRNA/CIL0929S0181, intron 10 of 28)	1781649	1797341	15693	-	CIL0929S0181
scaffold71126	1851479	1851533	55	strongHyper	0.254	3.6e-15	Promoter (<=1kb)	1850014	1850652	639	-	CIL0929S0185
scaffold71126	1866857	1867122	266	strongHypo	-0.108	0.00213	Distal Intergenic	1873929	1879478	5550	+	CIL0929S0187
scaffold71126	1883300	1883744	445	strongHypo	-0.146	5.49e-05	Distal Intergenic	1873929	1879478	5550	+	CIL0929S0187
scaffold71126	2017958	2017996	39	strongHypo	-0.316	1.88e-08	Promoter (1-2kb)	2018979	2035622	16644	+	CIL0929S0194
scaffold71126	2026557	2026645	89	strongHyper	0.18	3.88e-06	Intron (CIL0929S0194.mRNA/CIL0929S0194, intron 5 of 8)	2018979	2035622	16644	+	CIL0929S0194
scaffold71126	2031616	2031768	153	strongHyper	0.12	0.00645	Intron (CIL0929S0194.mRNA/CIL0929S0194, intron 5 of 8)	2038406	2039509	1104	+	CIL0929S0195
scaffold71126	2102442	2102983	542	strongHypo	-0.147	2.63e-11	Distal Intergenic	2106033	2107970	1938	-	CIL0929S0201
scaffold71126	2160261	2160284	24	strongHyper	0.219	9.98e-07	Distal Intergenic	2151763	2153045	1283	-	CIL0929S0206
scaffold71126	2636876	2637062	187	strongHyper	0.199	2.97e-10	Intron (CIL0929S0221.mRNA/CIL0929S0221, intron 6 of 8)	2618393	2638243	19851	-	CIL0929S0221
scaffold71126	2773495	2773786	292	strongHypo	-0.108	0.00603	Promoter (2-3kb)	2776143	2786268	10126	+	CIL0929S0224
scaffold71348	88060	88150	91	strongHyper	0.226	6.07e-06	Promoter (1-2kb)	89437	92903	3467	+	CIL0935S0008
scaffold71348	116859	116876	18	strongHypo	-0.246	1.1e-07	Distal Intergenic	106728	109835	3108	-	CIL0935S0011
scaffold71348	141175	141367	193	strongHypo	-0.14	7.58e-10	Intron (CIL0935S0014.mRNA/CIL0935S0014, intron 9 of 16)	133074	162121	29048	+	CIL0935S0014
scaffold71348	255252	255582	331	strongHypo	-0.132	2.64e-07	Distal Intergenic	262316	263469	1154	+	CIL0935S0024
scaffold71348	293798	293913	116	strongHypo	-0.129	0.000122	Exon (CIL0935S0025.mRNA/CIL0935S0025, exon 1 of 2)	293787	295071	1285	+	CIL0935S0025
scaffold71348	482582	483129	548	strongHypo	-0.103	0.00571	Distal Intergenic	471973	472160	188	-	CIL0935S0034
scaffold71348	540321	540486	166	strongHyper	0.191	1.16e-07	Distal Intergenic	564433	564945	513	-	CIL0935S0037
scaffold71348	567176	567203	28	strongHypo	-0.343	3.22e-09	Promoter (2-3kb)	564433	564945	513	-	CIL0935S0037
scaffold71348	572507	572543	37	strongHypo	-0.114	0.00528	Distal Intergenic	564433	564945	513	-	CIL0935S0037
scaffold71348	598145	598401	257	strongHypo	-0.168	2.25e-07	Distal Intergenic	564433	564945	513	-	CIL0935S0037
scaffold71348	598709	598826	118	strongHypo	-0.131	0.00138	Distal Intergenic	564433	564945	513	-	CIL0935S0037
scaffold71348	723814	723890	77	strongHypo	-0.226	0.000121	Distal Intergenic	715489	716858	1370	-	CIL0935S0050
scaffold71348	1048514	1048729	216	strongHypo	-0.105	0.000696	Distal Intergenic	1065641	1072653	7013	+	CIL0935S0066
scaffold71348	1123982	1124078	97	strongHypo	-0.2	6.09e-06	Distal Intergenic	1150387	1152521	2135	+	CIL0935S0071
scaffold71348	1274409	1274607	199	strongHyper	0.139	0.00199	Intron (CIL0935S0078.mRNA/CIL0935S0078, intron 3 of 7)	1267979	1281966	13988	-	CIL0935S0078
scaffold71348	1292451	1292662	212	strongHyper	0.174	0.000464	Distal Intergenic	1283954	1288643	4690	-	CIL0935S0079
scaffold71348	1339936	1340056	121	strongHyper	0.138	5.53e-05	Intron (CIL0935S0081.mRNA/CIL0935S0081, intron 6 of 10)	1313721	1347768	34048	+	CIL0935S0081
scaffold71348	1394904	1394975	72	strongHyper	0.113	7.21e-05	Intron (CIL0935S0083.mRNA/CIL0935S0083, intron 5 of 6)	1382330	1396082	13753	-	CIL0935S0083
scaffold71348	1599926	1600135	210	strongHypo	-0.14	3.42e-07	Distal Intergenic	1538109	1539368	1260	+	CIL0935S0089
scaffold71348	1638469	1638566	98	strongHypo	-0.277	1.17e-08	Distal Intergenic	1687755	1690286	2532	-	CIL0935S0093
scaffold71348	1691977	1692094	118	strongHypo	-0.262	1.02e-08	Promoter (1-2kb)	1687755	1690286	2532	-	CIL0935S0093
scaffold71348	1694106	1694299	194	strongHyper	0.288	9.58e-08	Distal Intergenic	1687755	1690286	2532	-	CIL0935S0093
scaffold71348	1767623	1767634	12	strongHyper	0.239	3.31e-07	Distal Intergenic	1760373	1762575	2203	-	CIL0935S0097
scaffold71348	1798638	1798738	101	strongHyper	0.188	0.000148	Promoter (1-2kb)	1800286	1807468	7183	+	CIL0935S0100
scaffold71348	1846461	1846484	24	strongHypo	-0.293	2.46e-06	Intron (CIL0935S0106.mRNA/CIL0935S0106, intron 2 of 4)	1842142	1851262	9121	-	CIL0935S0106
scaffold71348	1850486	1850751	266	strongHypo	-0.154	2.34e-07	Intron (CIL0935S0106.mRNA/CIL0935S0106, intron 4 of 4)	1842142	1851262	9121	-	CIL0935S0106
scaffold71348	1961349	1961369	21	strongHypo	-0.297	0.000135	Intron (CIL0935S0117.mRNA/CIL0935S0117, intron 1 of 3)	1959194	1963967	4774	+	CIL0935S0117
scaffold71348	2111259	2111757	499	strongHyper	0.104	0.0248	Intron (CIL0935S0137.mRNA/CIL0935S0137, intron 3 of 14)	2106943	2109341	2399	+	CIL0935S0136
scaffold71348	2132395	2132507	113	strongHyper	0.158	1.27e-09	Exon (CIL0935S0139.mRNA/CIL0935S0139, exon 2 of 6)	2126155	2133886	7732	-	CIL0935S0139
scaffold71348	2171949	2172117	169	strongHypo	-0.227	1.3e-06	Intron (CIL0935S0146.mRNA/CIL0935S0146, intron 9 of 28)	2164434	2184470	20037	+	CIL0935S0146
scaffold71348	2282924	2283091	168	strongHypo	-0.172	0.000294	Intron (CIL0935S0153.mRNA/CIL0935S0153, intron 2 of 34)	2272009	2350438	78430	+	CIL0935S0153
scaffold71348	2351989	2352046	58	strongHyper	0.239	1.03e-07	Distal Intergenic	2391813	2398203	6391	+	CIL0935S0154
scaffold71348	2520408	2520712	305	strongHypo	-0.114	2.05e-05	Distal Intergenic	2515116	2515430	315	-	CIL0935S0167
scaffold71460	134031	134181	151	strongHypo	-0.246	5.25e-11	Distal Intergenic	129730	132851	3122	+	CIL0937S0015
scaffold71460	239116	239129	14	strongHyper	0.198	0.000214	Intron (CIL0937S0020.mRNA/CIL0937S0020, intron 1 of 7)	247047	247458	412	-	CIL0937S0021
scaffold71460	591622	591734	113	strongHyper	0.285	2.07e-06	Distal Intergenic	578751	582600	3850	-	CIL0937S0061
scaffold71460	769812	769917	106	strongHypo	-0.114	2.37e-08	Exon (CIL0937S0083.mRNA/CIL0937S0083, exon 10 of 15)	764134	767492	3359	+	CIL0937S0082
scaffold71460	803106	803583	478	strongHypo	-0.134	7.06e-06	Distal Intergenic	806472	812026	5555	-	CIL0937S0085
scaffold71460	835368	835734	367	strongHyper	0.116	4.91e-06	Distal Intergenic	839769	841420	1652	-	CIL0937S0086
scaffold71460	850377	850419	43	strongHyper	0.178	0.00015	Intron (CIL0937S0087.mRNA/CIL0937S0087, intron 1 of 3)	848961	851730	2770	+	CIL0937S0087
scaffold71460	989913	989969	57	strongHypo	-0.169	2.83e-05	Distal Intergenic	1012303	1013662	1360	+	CIL0937S0093
scaffold71460	1069807	1069908	102	strongHyper	0.202	1.28e-06	Promoter (2-3kb)	1072726	1077355	4630	+	CIL0937S0096
scaffold71460	1168675	1168704	30	strongHyper	0.15	0.00209	Promoter (1-2kb)	1164094	1166820	2727	-	CIL0937S0099
scaffold71460	1206072	1206292	221	strongHyper	0.188	0.000111	Distal Intergenic	1164094	1166820	2727	-	CIL0937S0099
scaffold71460	1285594	1285793	200	strongHyper	0.113	0.00746	Intron (CIL0937S0103.mRNA/CIL0937S0103, intron 2 of 9)	1283806	1296496	12691	+	CIL0937S0103
scaffold71460	1822705	1822819	115	strongHypo	-0.183	6.99e-06	Distal Intergenic	1816944	1818442	1499	+	CIL0937S0126
scaffold71460	1856078	1856161	84	strongHyper	0.197	9.09e-08	Distal Intergenic	1846004	1850389	4386	-	CIL0937S0127
scaffold71460	1857509	1857669	161	strongHyper	0.185	0.00152	Distal Intergenic	1863864	1866404	2541	+	CIL0937S0128
scaffold71460	1865269	1865320	52	strongHyper	0.178	5e-09	Exon (CIL0937S0128.mRNA/CIL0937S0128, exon 1 of 1)	1863864	1866404	2541	+	CIL0937S0128
scaffold71460	1957716	1957817	102	strongHyper	0.154	1.44e-05	Distal Intergenic	1942598	1945878	3281	-	CIL0937S0138
scaffold71460	2132671	2132816	146	strongHypo	-0.199	8.69e-08	Distal Intergenic	2112021	2112263	243	+	CIL0937S0153
scaffold71460	2140100	2140134	35	strongHyper	0.205	1.63e-10	Distal Intergenic	2112021	2112263	243	+	CIL0937S0153
scaffold71460	2248641	2248673	33	strongHyper	0.152	2.78e-05	Distal Intergenic	2254917	2265930	11014	-	CIL0937S0156
scaffold71460	2260012	2260036	25	strongHyper	0.26	8.28e-09	Intron (CIL0937S0156.mRNA/CIL0937S0156, intron 5 of 5)	2254917	2265930	11014	-	CIL0937S0156
scaffold71460	2267925	2267954	30	strongHyper	0.238	1.02e-14	Promoter (2-3kb)	2254917	2265930	11014	-	CIL0937S0156
scaffold71460	2342524	2342576	53	strongHypo	-0.219	6.2e-06	Distal Intergenic	2391857	2415952	24096	+	CIL0937S0157
scaffold71460	2398538	2398773	236	strongHypo	-0.153	0.000268	Intron (CIL0937S0157.mRNA/CIL0937S0157, intron 9 of 20)	2391857	2415952	24096	+	CIL0937S0157
scaffold71460	2483558	2483632	75	strongHypo	-0.21	2.22e-05	Distal Intergenic	2486441	2490148	3708	-	CIL0937S0162
scaffold71682	106773	107039	267	strongHypo	-0.162	5.14e-08	5' UTR	105009	107922	2914	-	CIL0938S0005
scaffold71682	244030	244280	251	strongHypo	-0.134	3.69e-05	Distal Intergenic	226562	230299	3738	-	CIL0938S0011
scaffold71682	259202	259288	87	strongHypo	-0.298	9.88e-07	Distal Intergenic	226562	230299	3738	-	CIL0938S0011
scaffold71682	273571	273652	82	strongHyper	0.227	2.42e-06	Distal Intergenic	298316	301031	2716	-	CIL0938S0015
scaffold71682	324394	324590	197	strongHyper	0.108	0.0037	Intron (CIL0938S0018.mRNA/CIL0938S0018, intron 1 of 3)	323879	331754	7876	-	CIL0938S0018
scaffold71682	371740	372044	305	strongHypo	-0.129	0.00285	Distal Intergenic	323879	331754	7876	-	CIL0938S0018
scaffold71682	411212	411282	71	strongHypo	-0.517	1.17e-06	Distal Intergenic	443871	444389	519	+	CIL0938S0022
scaffold71682	484951	485205	255	strongHypo	-0.136	0.0296	Distal Intergenic	502567	505396	2830	-	CIL0938S0024
scaffold71682	620340	620450	111	strongHyper	0.321	2.56e-07	Intron (CIL0938S0034.mRNA/CIL0938S0034, intron 4 of 6)	616517	721225	104709	+	CIL0938S0034
scaffold71682	635644	635990	347	strongHypo	-0.116	0.0104	Intron (CIL0938S0034.mRNA/CIL0938S0034, intron 4 of 6)	616517	721225	104709	+	CIL0938S0034
scaffold71682	780382	780657	276	strongHypo	-0.248	3.67e-06	Distal Intergenic	766419	768267	1849	+	CIL0938S0035
scaffold71682	976031	976693	663	strongHypo	-0.125	1.01e-07	Intron (CIL0938S0045.mRNA/CIL0938S0045, intron 6 of 13)	970452	984056	13605	+	CIL0938S0045
scaffold71682	980133	980145	13	strongHyper	0.381	7.17e-12	Intron (CIL0938S0045.mRNA/CIL0938S0045, intron 8 of 13)	985034	993955	8922	+	CIL0938S0046
scaffold71682	1014338	1014349	12	strongHyper	0.184	1.33e-08	Distal Intergenic	1011692	1012962	1271	+	CIL0938S0049
scaffold71682	1179569	1179728	160	strongHyper	0.146	7.4e-06	Distal Intergenic	1153667	1154867	1201	+	CIL0938S0060
scaffold71682	1217320	1217363	44	strongHyper	0.27	8.44e-08	Intron (CIL0938S0061.mRNA/CIL0938S0061, intron 9 of 10)	1212535	1222107	9573	+	CIL0938S0061
scaffold71682	1258464	1258836	373	strongHyper	0.12	0.00531	Distal Intergenic	1250475	1254991	4517	+	CIL0938S0065
scaffold71682	1276086	1276139	54	strongHypo	-0.201	1.62e-06	Intron (CIL0938S0067.mRNA/CIL0938S0067, intron 8 of 14)	1270586	1283090	12505	+	CIL0938S0067
scaffold71682	1366535	1366757	223	strongHyper	0.229	2.77e-09	Distal Intergenic	1393557	1405997	12441	-	CIL0938S0069
scaffold71682	1582376	1582646	271	strongHyper	0.169	6.3e-10	Intron (CIL0938S0080.mRNA/CIL0938S0080, intron 3 of 4)	1559471	1631323	71853	+	CIL0938S0080
scaffold71682	1654470	1654692	223	strongHypo	-0.127	5.5e-10	Intron (CIL0938S0082.mRNA/CIL0938S0082, intron 6 of 6)	1649162	1660945	11784	+	CIL0938S0082
scaffold71682	1655620	1655760	141	strongHyper	0.109	2.27e-06	Intron (CIL0938S0082.mRNA/CIL0938S0082, intron 6 of 6)	1649162	1660945	11784	+	CIL0938S0082
scaffold71682	1655992	1656005	14	strongHyper	0.118	0.00827	Intron (CIL0938S0082.mRNA/CIL0938S0082, intron 6 of 6)	1649162	1660945	11784	+	CIL0938S0082
scaffold71682	1663854	1664211	358	strongHyper	0.15	0.00011	Distal Intergenic	1649162	1660945	11784	+	CIL0938S0082
scaffold71682	1671114	1671122	9	strongHyper	0.321	2.63e-05	Distal Intergenic	1649162	1660945	11784	+	CIL0938S0082
scaffold71682	1706485	1706808	324	strongHypo	-0.2	4.31e-08	Distal Intergenic	1744667	1754365	9699	+	CIL0938S0084
scaffold71682	1719512	1719533	22	strongHypo	-0.242	1.33e-09	Distal Intergenic	1744667	1754365	9699	+	CIL0938S0084
scaffold71682	1911171	1911265	95	strongHypo	-0.169	9.72e-05	Distal Intergenic	1903458	1903944	487	-	CIL0938S0090
scaffold71682	1956132	1956192	61	strongHyper	0.19	5.9e-05	3' UTR	1953885	1956277	2393	+	CIL0938S0092
scaffold71682	2045639	2045892	254	strongHypo	-0.123	0.00439	Promoter (2-3kb)	2048477	2049663	1187	+	CIL0938S0099
scaffold71682	2046255	2046319	65	strongHypo	-0.134	4.11e-08	Promoter (2-3kb)	2048477	2049663	1187	+	CIL0938S0099
scaffold71682	2046766	2046938	173	strongHypo	-0.212	6.69e-09	Promoter (1-2kb)	2048477	2049663	1187	+	CIL0938S0099
scaffold71682	2073065	2073076	12	strongHypo	-0.243	9.17e-09	Exon (CIL0938S0101.mRNA/CIL0938S0101, exon 6 of 13)	2070121	2077428	7308	+	CIL0938S0101
scaffold71682	2110405	2110411	7	strongHyper	0.17	5.06e-05	Distal Intergenic	2102595	2103976	1382	-	CIL0938S0103
scaffold71682	2138118	2138392	275	strongHyper	0.11	0.000314	Distal Intergenic	2121405	2124888	3484	-	CIL0938S0105
scaffold71682	2141626	2141965	340	strongHypo	-0.111	0.00026	Distal Intergenic	2121405	2124888	3484	-	CIL0938S0105
scaffold71682	2173729	2173831	103	strongHyper	0.135	0.000361	Intron (CIL0938S0106.mRNA/CIL0938S0106, intron 18 of 55)	2161326	2216247	54922	-	CIL0938S0106
scaffold71682	2174466	2174512	47	strongHypo	-0.297	1.08e-11	Intron (CIL0938S0106.mRNA/CIL0938S0106, intron 18 of 55)	2161326	2216247	54922	-	CIL0938S0106
scaffold71682	2200861	2201023	163	strongHyper	0.176	1.08e-06	Intron (CIL0938S0106.mRNA/CIL0938S0106, intron 43 of 55)	2161326	2216247	54922	-	CIL0938S0106
scaffold71682	2217686	2217789	104	strongHyper	0.244	0.00288	Promoter (1-2kb)	2161326	2216247	54922	-	CIL0938S0106
scaffold71682	2218041	2218225	185	strongHyper	0.158	1.02e-07	Promoter (1-2kb)	2161326	2216247	54922	-	CIL0938S0106
scaffold71682	2218618	2218724	107	strongHyper	0.149	2.24e-06	Distal Intergenic	2219356	2220800	1445	-	CIL0938S0107
scaffold71682	2241617	2241800	184	strongHypo	-0.268	1.01e-26	Distal Intergenic	2234192	2236565	2374	+	CIL0938S0110
scaffold71682	2241925	2242134	210	strongHyper	0.175	1.1e-12	Distal Intergenic	2234192	2236565	2374	+	CIL0938S0110
scaffold71682	2434203	2434226	24	strongHypo	-0.241	7.89e-06	Distal Intergenic	2445370	2449486	4117	+	CIL0938S0124
scaffold71682	2502777	2502898	122	strongHyper	0.129	0.000419	Intron (CIL0938S0131.mRNA/CIL0938S0131, intron 8 of 12)	2507414	2509850	2437	-	CIL0938S0132
scaffold71682	2581282	2581471	190	strongHypo	-0.139	4.42e-05	5' UTR	2573445	2606177	32733	+	CIL0938S0135
scaffold71682	2585830	2585946	117	strongHypo	-0.154	0.000757	Intron (CIL0938S0135.mRNA/CIL0938S0135, intron 4 of 22)	2573445	2606177	32733	+	CIL0938S0135
scaffold71682	2589552	2589643	92	strongHypo	-0.256	2.01e-05	Intron (CIL0938S0135.mRNA/CIL0938S0135, intron 4 of 22)	2573445	2606177	32733	+	CIL0938S0135
scaffold71682	2611635	2611653	19	strongHyper	0.181	1.27e-05	Distal Intergenic	2616646	2619978	3333	-	CIL0938S0136
scaffold71682	2710174	2710332	159	strongHyper	0.217	4.64e-07	Intron (CIL0938S0144.mRNA/CIL0938S0144, intron 3 of 7)	2706750	2713565	6816	+	CIL0938S0144
scaffold71793	29476	29580	105	strongHyper	0.229	2.43e-05	Distal Intergenic	24224	28533	4310	+	CIL0940S0002
scaffold71793	29975	30254	280	strongHyper	0.155	5.53e-08	Distal Intergenic	24224	28533	4310	+	CIL0940S0002
scaffold71793	88555	88710	156	strongHypo	-0.225	4.28e-06	Distal Intergenic	69973	74746	4774	-	CIL0940S0006
scaffold71793	142949	142983	35	strongHyper	0.382	6.2e-13	Distal Intergenic	138368	141770	3403	+	CIL0940S0009
scaffold71793	309389	309660	272	strongHypo	-0.195	1.65e-09	Distal Intergenic	315305	317927	2623	+	CIL0940S0023
scaffold71793	311678	311708	31	strongHypo	-0.264	1.04e-11	Distal Intergenic	315305	317927	2623	+	CIL0940S0023
scaffold71793	471479	471586	108	strongHypo	-0.223	8.81e-07	Distal Intergenic	460359	460664	306	-	CIL0940S0031
scaffold71793	510921	510978	58	strongHyper	0.169	0.000303	Intron (CIL0940S0035.mRNA/CIL0940S0035, intron 2 of 3)	507715	515477	7763	+	CIL0940S0035
scaffold71793	567647	567850	204	strongHypo	-0.294	3.29e-14	Distal Intergenic	565683	567034	1352	+	CIL0940S0037
scaffold71793	570346	570601	256	strongHypo	-0.117	0.0106	Distal Intergenic	565683	567034	1352	+	CIL0940S0037
scaffold71793	671478	671608	131	strongHypo	-0.328	1.09e-13	Distal Intergenic	666486	667394	909	-	CIL0940S0046
scaffold71793	760073	760164	92	strongHypo	-0.107	3.24e-09	Promoter (2-3kb)	762436	765847	3412	+	CIL0940S0055
scaffold71793	805160	805306	147	strongHyper	0.281	4.18e-07	Distal Intergenic	784434	789021	4588	-	CIL0940S0058
scaffold71793	874763	874830	68	strongHyper	0.165	0.000153	Intron (CIL0940S0063.mRNA/CIL0940S0063, intron 12 of 13)	870543	875978	5436	-	CIL0940S0063
scaffold71793	906100	906269	170	strongHypo	-0.179	4.62e-06	Promoter (1-2kb)	903173	904383	1211	-	CIL0940S0068
scaffold71793	962443	962456	14	strongHyper	0.383	1.01e-07	Distal Intergenic	975147	975408	262	+	CIL0940S0072
scaffold71793	1197310	1197322	13	strongHypo	-0.28	8.27e-09	Distal Intergenic	1212712	1216312	3601	+	CIL0940S0087
scaffold71793	1218893	1218981	89	strongHypo	-0.158	0.00263	Distal Intergenic	1212712	1216312	3601	+	CIL0940S0087
scaffold71793	1225297	1225396	100	strongHyper	0.145	2.1e-14	Distal Intergenic	1212712	1216312	3601	+	CIL0940S0087
scaffold71793	1394298	1394314	17	strongHypo	-0.322	2.93e-09	Promoter (<=1kb)	1394567	1394917	351	+	CIL0940S0103
scaffold71793	1495096	1495500	405	strongHyper	0.112	2.32e-07	Intron (CIL0940S0112.mRNA/CIL0940S0112, intron 6 of 38)	1484576	1487628	3053	+	CIL0940S0111
scaffold71793	1495992	1496064	73	strongHyper	0.16	8.01e-05	Intron (CIL0940S0112.mRNA/CIL0940S0112, intron 6 of 38)	1484576	1487628	3053	+	CIL0940S0111
scaffold71793	1504272	1504416	145	strongHyper	0.216	9.26e-08	Intron (CIL0940S0112.mRNA/CIL0940S0112, intron 12 of 38)	1488012	1522749	34738	-	CIL0940S0112
scaffold71793	1520550	1520606	57	strongHyper	0.215	4.72e-06	Intron (CIL0940S0112.mRNA/CIL0940S0112, intron 34 of 38)	1488012	1522749	34738	-	CIL0940S0112
scaffold71793	1545487	1545619	133	strongHyper	0.226	5.41e-07	Exon (CIL0940S0114.mRNA/CIL0940S0114, exon 5 of 11)	1540572	1551984	11413	+	CIL0940S0114
scaffold71793	1630682	1630692	11	strongHypo	-0.457	7.67e-17	Promoter (2-3kb)	1627452	1628084	633	-	CIL0940S0127
scaffold71793	1654536	1654580	45	strongHypo	-0.274	7.03e-13	Promoter (<=1kb)	1655309	1656334	1026	+	CIL0940S0130
scaffold71793	1723600	1723725	126	strongHypo	-0.264	2.57e-09	Distal Intergenic	1724196	1726983	2788	-	CIL0940S0137
scaffold71793	1775881	1775892	12	strongHyper	0.279	3.58e-07	Intron (CIL0940S0144.mRNA/CIL0940S0144, intron 1 of 3)	1771703	1774369	2667	+	CIL0940S0143
scaffold71793	2057424	2057634	211	strongHypo	-0.101	1.31e-05	Intron (CIL0940S0179.mRNA/CIL0940S0179, intron 4 of 4)	2051166	2064556	13391	-	CIL0940S0179
scaffold71793	2129430	2129458	29	strongHyper	0.239	0.00148	Promoter (2-3kb)	2131992	2134742	2751	+	CIL0940S0186
scaffold71793	2139777	2140195	419	strongHypo	-0.262	8.94e-08	Distal Intergenic	2146420	2151212	4793	+	CIL0940S0187
scaffold71793	2168232	2168396	165	strongHypo	-0.182	3.7e-07	Exon (CIL0940S0189.mRNA/CIL0940S0189, exon 7 of 13)	2164039	2170051	6013	-	CIL0940S0189
scaffold71793	2199666	2199731	66	strongHypo	-0.207	2.28e-05	Distal Intergenic	2204716	2207417	2702	+	CIL0940S0192
scaffold71793	2291410	2291530	121	strongHypo	-0.306	1.52e-05	Distal Intergenic	2297963	2300691	2729	+	CIL0940S0197
scaffold71793	2298039	2298139	101	strongHypo	-0.461	3.57e-05	Exon (CIL0940S0197.mRNA/CIL0940S0197, exon 1 of 2)	2297963	2300691	2729	+	CIL0940S0197
scaffold71793	2337347	2337525	179	strongHyper	0.154	8.69e-05	Intron (CIL0940S0203.mRNA/CIL0940S0203, intron 11 of 18)	2320781	2323649	2869	-	CIL0940S0202
scaffold71793	2350310	2350393	84	strongHypo	-0.288	5.17e-06	Intron (CIL0940S0203.mRNA/CIL0940S0203, intron 16 of 18)	2325051	2353604	28554	-	CIL0940S0203
scaffold72015	146739	146759	21	strongHyper	0.175	7.03e-05	Distal Intergenic	187327	188728	1402	+	CIL0942S0003
scaffold72015	286627	286722	96	strongHyper	0.207	9.69e-06	Distal Intergenic	288023	290297	2275	-	CIL0942S0016
scaffold72015	416536	416577	42	strongHyper	0.197	0.000119	Intron (CIL0942S0038.mRNA/CIL0942S0038, intron 5 of 7)	399793	411465	11673	-	CIL0942S0037
scaffold72015	432996	433272	277	strongHypo	-0.217	2.67e-07	Promoter (<=1kb)	431418	432818	1401	-	CIL0942S0040
scaffold72015	443864	443876	13	strongHypo	-0.426	3.15e-08	Exon (CIL0942S0042.mRNA/CIL0942S0042, exon 4 of 16)	438222	445140	6919	-	CIL0942S0042
scaffold72015	710317	710355	39	strongHyper	0.353	2.61e-06	Promoter (1-2kb)	707914	709221	1308	-	CIL0942S0088
scaffold72015	777186	777455	270	strongHypo	-0.106	0.0179	Intron (CIL0942S0099.mRNA/CIL0942S0099, intron 4 of 7)	772330	784309	11980	-	CIL0942S0099
scaffold72015	811010	811155	146	strongHyper	0.162	1.96e-06	Intron (CIL0942S0103.mRNA/CIL0942S0103, intron 7 of 15)	815268	817224	1957	+	CIL0942S0104
scaffold72015	833705	833954	250	strongHypo	-0.195	0.000944	Intron (CIL0942S0107.mRNA/CIL0942S0107, intron 7 of 15)	829683	838153	8471	-	CIL0942S0107
scaffold72015	961228	961413	186	strongHypo	-0.142	0.000191	Distal Intergenic	971312	978693	7382	-	CIL0942S0119
scaffold72015	1210022	1210175	154	strongHyper	0.202	0.000479	Exon (CIL0942S0127.mRNA/CIL0942S0127, exon 6 of 9)	1208399	1211095	2697	-	CIL0942S0127
scaffold72015	1228067	1228594	528	strongHypo	-0.154	0.000211	Distal Intergenic	1212803	1214682	1880	-	CIL0942S0128
scaffold72015	1267530	1267615	86	strongHyper	0.19	1.58e-13	Distal Intergenic	1268526	1271220	2695	-	CIL0942S0133
scaffold72015	1367975	1368103	129	strongHypo	-0.12	2.88e-05	Intron (CIL0942S0136.mRNA/CIL0942S0136, intron 4 of 16)	1360314	1360577	264	+	CIL0942S0135
scaffold72015	1424518	1424611	94	strongHyper	0.189	2.72e-06	Distal Intergenic	1360392	1383356	22965	-	CIL0942S0136
scaffold72015	1449820	1449886	67	strongHyper	0.147	0.000463	Intron (CIL0942S0137.mRNA/CIL0942S0137, intron 5 of 34)	1444966	1499264	54299	-	CIL0942S0137
scaffold72015	1464470	1465091	622	strongHypo	-0.113	1e-09	Intron (CIL0942S0137.mRNA/CIL0942S0137, intron 13 of 34)	1444966	1499264	54299	-	CIL0942S0137
scaffold72015	1494001	1494067	67	strongHypo	-0.179	0.000382	Intron (CIL0942S0137.mRNA/CIL0942S0137, intron 34 of 34)	1444966	1499264	54299	-	CIL0942S0137
scaffold72015	1497419	1497543	125	strongHyper	0.136	2.44e-06	Intron (CIL0942S0137.mRNA/CIL0942S0137, intron 34 of 34)	1444966	1499264	54299	-	CIL0942S0137
scaffold72015	1572310	1572365	56	strongHypo	-0.169	3.63e-06	Intron (CIL0942S0142.mRNA/CIL0942S0142, intron 3 of 3)	1570270	1572795	2526	+	CIL0942S0142
scaffold72015	1637799	1638023	225	strongHyper	0.159	2.07e-07	Promoter (<=1kb)	1638110	1639384	1275	+	CIL0942S0146
scaffold72015	1640090	1640189	100	strongHyper	0.33	1.16e-12	Distal Intergenic	1638110	1639384	1275	+	CIL0942S0146
scaffold72015	1710697	1710924	228	strongHyper	0.222	0.000468	Intron (CIL0942S0149.mRNA/CIL0942S0149, intron 6 of 13)	1693007	1727288	34282	-	CIL0942S0149
scaffold72015	1712135	1712329	195	strongHyper	0.12	1.39e-07	Intron (CIL0942S0149.mRNA/CIL0942S0149, intron 6 of 13)	1693007	1727288	34282	-	CIL0942S0149
scaffold72015	1719813	1719823	11	strongHypo	-0.284	2.85e-07	Intron (CIL0942S0149.mRNA/CIL0942S0149, intron 10 of 13)	1693007	1727288	34282	-	CIL0942S0149
scaffold72015	1894016	1894052	37	strongHyper	0.148	2.26e-09	Distal Intergenic	1891516	1892577	1062	+	CIL0942S0154
scaffold72015	1966582	1966634	53	strongHypo	-0.201	7.94e-05	Distal Intergenic	1956001	1965009	9009	+	CIL0942S0158
scaffold72015	1968552	1968909	358	strongHypo	-0.152	0.00557	Distal Intergenic	1956001	1965009	9009	+	CIL0942S0158
scaffold72015	1979564	1979707	144	strongHypo	-0.269	1.35e-14	Distal Intergenic	1956001	1965009	9009	+	CIL0942S0158
scaffold72015	2044499	2044573	75	strongHyper	0.275	9.84e-05	Distal Intergenic	2083671	2085319	1649	+	CIL0942S0159
scaffold72015	2374487	2374546	60	strongHyper	0.303	2.19e-06	Promoter (1-2kb)	2372113	2373252	1140	-	CIL0942S0178
scaffold72015	2586222	2586286	65	strongHyper	0.122	1.07e-05	Distal Intergenic	2592633	2593077	445	+	CIL0942S0194
scaffold72015	2642563	2642646	84	strongHypo	-0.229	7.42e-05	Distal Intergenic	2649014	2664159	15146	+	CIL0942S0197
scaffold72015	2707017	2707029	13	strongHyper	0.223	2.13e-06	Exon (CIL0942S0207.mRNA/CIL0942S0207, exon 2 of 6)	2705112	2709220	4109	+	CIL0942S0207
scaffold72015	2754634	2754675	42	strongHyper	0.258	3.9e-05	Intron (CIL0942S0213.mRNA/CIL0942S0213, intron 4 of 4)	2748682	2757771	9090	-	CIL0942S0213
scaffold72126	31077	31093	17	strongHypo	-0.361	7.92e-10	Distal Intergenic	39943	41926	1984	-	CIL0945S0005
scaffold72126	65276	65327	52	strongHyper	0.241	3.19e-06	Distal Intergenic	56337	60172	3836	-	CIL0945S0006
scaffold72126	115610	115783	174	strongHypo	-0.324	1.08e-08	Distal Intergenic	102589	105769	3181	-	CIL0945S0011
scaffold72126	127467	127787	321	strongHypo	-0.193	0.00207	Distal Intergenic	102589	105769	3181	-	CIL0945S0011
scaffold72126	149641	150367	727	strongHypo	-0.133	1.13e-08	Distal Intergenic	161999	165318	3320	+	CIL0945S0013
scaffold72126	182503	182890	388	strongHypo	-0.254	3.05e-40	Distal Intergenic	161999	165318	3320	+	CIL0945S0013
scaffold72126	326684	327072	389	strongHypo	-0.149	1.47e-07	Distal Intergenic	327753	331565	3813	-	CIL0945S0022
scaffold72126	419170	419185	16	strongHypo	-0.282	8.96e-09	Distal Intergenic	427833	428396	564	+	CIL0945S0026
scaffold72126	438649	438681	33	strongHypo	-0.18	4.21e-08	Distal Intergenic	427833	428396	564	+	CIL0945S0026
scaffold72126	462459	462490	32	strongHyper	0.118	0.00261	Intron (CIL0945S0029.mRNA/CIL0945S0029, intron 2 of 4)	455911	465239	9329	-	CIL0945S0029
scaffold72126	475077	475495	419	strongHyper	0.107	2.18e-06	Distal Intergenic	455911	465239	9329	-	CIL0945S0029
scaffold72126	653298	653501	204	strongHyper	0.186	9.63e-06	Distal Intergenic	591927	600028	8102	+	CIL0945S0040
scaffold72126	738144	738231	88	strongHypo	-0.141	1.22e-05	Distal Intergenic	771353	775212	3860	-	CIL0945S0043
scaffold72126	814317	814786	470	strongHypo	-0.148	6.82e-07	Intron (CIL0945S0046.mRNA/CIL0945S0046, intron 6 of 12)	807136	822776	15641	+	CIL0945S0046
scaffold72126	1106385	1106530	146	strongHyper	0.113	4.99e-10	Exon (CIL0945S0061.mRNA/CIL0945S0061, exon 3 of 14)	1105436	1120499	15064	+	CIL0945S0061
scaffold72126	1122807	1123048	242	strongHypo	-0.188	1.8e-07	Distal Intergenic	1129207	1136136	6930	+	CIL0945S0062
scaffold72126	1182357	1182550	194	strongHypo	-0.202	4.18e-05	Distal Intergenic	1187816	1188248	433	-	CIL0945S0064
scaffold72126	1183001	1183189	189	strongHypo	-0.184	0.000206	Distal Intergenic	1187816	1188248	433	-	CIL0945S0064
scaffold72126	1394816	1394969	154	strongHypo	-0.135	1.09e-05	Distal Intergenic	1429525	1437902	8378	+	CIL0945S0077
scaffold72126	1450819	1452655	1837	strongHyper	0.136	2.69e-22	Distal Intergenic	1457272	1459940	2669	-	CIL0945S0078
scaffold72126	1553796	1553883	88	strongHypo	-0.263	6.37e-05	Distal Intergenic	1545914	1548980	3067	-	CIL0945S0086
scaffold72126	1580704	1580761	58	strongHyper	0.157	0.000377	Distal Intergenic	1574986	1577487	2502	+	CIL0945S0088
scaffold72126	1672645	1672824	180	strongHypo	-0.22	7.22e-08	Distal Intergenic	1637781	1640928	3148	-	CIL0945S0095
scaffold72126	1742748	1743069	322	strongHyper	0.126	5.09e-10	Promoter (2-3kb)	1737706	1740188	2483	-	CIL0945S0099
scaffold72126	1751290	1751300	11	strongHypo	-0.367	5.57e-07	Distal Intergenic	1741743	1747999	6257	-	CIL0945S0100
scaffold72126	1926477	1926812	336	strongHypo	-0.22	5.81e-10	Distal Intergenic	1920668	1923352	2685	+	CIL0945S0112
scaffold72126	1952173	1952339	167	strongHypo	-0.15	2.99e-05	Intron (CIL0945S0114.mRNA/CIL0945S0114, intron 20 of 35)	1944678	1962202	17525	-	CIL0945S0114
scaffold72126	1992710	1992857	148	strongHypo	-0.269	5.52e-12	Distal Intergenic	1962934	1964540	1607	-	CIL0945S0115
scaffold72126	2080220	2080369	150	strongHypo	-0.128	1.27e-05	Distal Intergenic	2069321	2071890	2570	-	CIL0945S0123
scaffold72126	2141029	2141101	73	strongHyper	0.191	2.62e-05	Distal Intergenic	2144944	2146858	1915	-	CIL0945S0130
scaffold72126	2248967	2249027	61	strongHyper	0.343	3.31e-09	Distal Intergenic	2252336	2252967	632	+	CIL0945S0141
scaffold72126	2293950	2293981	32	strongHypo	-0.17	0.0389	Distal Intergenic	2258264	2258767	504	-	CIL0945S0142
scaffold72126	2427575	2427719	145	strongHypo	-0.168	0.00115	Intron (CIL0945S0149.mRNA/CIL0945S0149, intron 2 of 9)	2424144	2434807	10664	+	CIL0945S0149
scaffold72126	2494409	2494574	166	strongHypo	-0.147	4.22e-06	Distal Intergenic	2478728	2479408	681	-	CIL0945S0152
scaffold72126	2494725	2495068	344	strongHyper	0.178	1.26e-10	Distal Intergenic	2478728	2479408	681	-	CIL0945S0152
scaffold72126	2526357	2526449	93	strongHypo	-0.129	4.13e-06	Intron (CIL0945S0153.mRNA/CIL0945S0153, intron 2 of 8)	2523073	2531495	8423	+	CIL0945S0153
scaffold72126	2657438	2657523	86	strongHypo	-0.201	5.61e-06	Intron (CIL0945S0162.mRNA/CIL0945S0162, intron 2 of 2)	2654887	2662830	7944	-	CIL0945S0162
scaffold72237	133918	133968	51	strongHyper	0.216	0.000224	Distal Intergenic	132922	133446	525	+	CIL0946S0004
scaffold72237	191449	191460	12	strongHypo	-0.215	9.15e-07	Intron (CIL0946S0008.mRNA/CIL0946S0008, intron 4 of 8)	187107	200099	12993	+	CIL0946S0008
scaffold72237	197938	198166	229	strongHypo	-0.111	0.0057	Intron (CIL0946S0008.mRNA/CIL0946S0008, intron 7 of 8)	204202	206903	2702	-	CIL0946S0009
scaffold72237	202987	203000	14	strongHypo	-0.23	3.66e-06	Distal Intergenic	204202	206903	2702	-	CIL0946S0009
scaffold72237	254428	254467	40	strongHyper	0.18	1.34e-09	Distal Intergenic	263952	265149	1198	+	CIL0946S0013
scaffold72237	299222	299349	128	strongHyper	0.163	9.79e-09	Promoter (<=1kb)	299659	304644	4986	+	CIL0946S0015
scaffold72237	334816	335112	297	strongHypo	-0.222	4.12e-08	Promoter (<=1kb)	331612	334136	2525	-	CIL0946S0019
scaffold72237	449946	450099	154	strongHyper	0.391	3.73e-06	Distal Intergenic	460131	462673	2543	+	CIL0946S0026
scaffold72237	518648	518735	88	strongHyper	0.213	4.4e-06	Promoter (2-3kb)	521410	523208	1799	+	CIL0946S0029
scaffold72237	654162	654183	22	strongHypo	-0.293	0.000149	Distal Intergenic	674911	677200	2290	+	CIL0946S0039
scaffold72237	778555	778570	16	strongHyper	0.236	0.000245	Exon (CIL0946S0051.mRNA/CIL0946S0051, exon 1 of 1)	778424	779217	794	+	CIL0946S0051
scaffold72237	793319	793375	57	strongHyper	0.256	6.91e-06	Intron (CIL0946S0052.mRNA/CIL0946S0052, intron 2 of 7)	790942	803850	12909	+	CIL0946S0052
scaffold72237	800383	800608	226	strongHyper	0.192	6.57e-08	Intron (CIL0946S0052.mRNA/CIL0946S0052, intron 3 of 7)	790942	803850	12909	+	CIL0946S0052
scaffold72237	917795	917807	13	strongHypo	-0.259	1.32e-11	Distal Intergenic	921099	922712	1614	+	CIL0946S0058
scaffold72237	941941	942182	242	strongHyper	0.15	0.0412	Intron (CIL0946S0060.mRNA/CIL0946S0060, intron 4 of 5)	937559	944821	7263	+	CIL0946S0060
scaffold72237	1224056	1224071	16	strongHyper	0.319	6.81e-06	Distal Intergenic	1186625	1191969	5345	+	CIL0946S0074
scaffold72237	1232713	1232742	30	strongHypo	-0.218	8.45e-05	Distal Intergenic	1186625	1191969	5345	+	CIL0946S0074
scaffold72237	1314206	1314271	66	strongHypo	-0.173	2.15e-05	Promoter (<=1kb)	1314519	1314950	432	+	CIL0946S0079
scaffold72237	1354885	1354935	51	strongHyper	0.207	9.92e-05	Distal Intergenic	1337551	1339500	1950	+	CIL0946S0080
scaffold72237	1401588	1401619	32	strongHyper	0.199	0.000347	Distal Intergenic	1424228	1426633	2406	+	CIL0946S0082
scaffold72237	1440052	1440105	54	strongHypo	-0.261	2.56e-07	Distal Intergenic	1424228	1426633	2406	+	CIL0946S0082
scaffold72237	1459349	1459573	225	strongHypo	-0.252	3.35e-07	Distal Intergenic	1424228	1426633	2406	+	CIL0946S0082
scaffold72237	1469149	1469227	79	strongHypo	-0.113	0.0013	Distal Intergenic	1494057	1508814	14758	-	CIL0946S0085
scaffold72237	1478689	1478864	176	strongHypo	-0.111	0.00108	Distal Intergenic	1494057	1508814	14758	-	CIL0946S0085
scaffold72237	1502510	1502615	106	strongHyper	0.253	4.15e-07	Intron (CIL0946S0085.mRNA/CIL0946S0085, intron 4 of 6)	1494057	1508814	14758	-	CIL0946S0085
scaffold72237	1659399	1659520	122	strongHyper	0.204	1.14e-08	Distal Intergenic	1641799	1646798	5000	+	CIL0946S0088
scaffold72237	1864061	1864209	149	strongHyper	0.24	1.72e-11	Promoter (2-3kb)	1866782	1868449	1668	+	CIL0946S0104
scaffold72237	1870327	1870338	12	strongHypo	-0.23	1.06e-05	Distal Intergenic	1866782	1868449	1668	+	CIL0946S0104
scaffold72237	1960720	1960894	175	strongHypo	-0.11	4.08e-05	Distal Intergenic	1979845	1981583	1739	-	CIL0946S0106
scaffold72237	2104678	2104689	12	strongHyper	0.188	2.17e-06	3' UTR	2104434	2108862	4429	-	CIL0946S0110
scaffold72237	2124790	2125349	560	strongHypo	-0.109	4.72e-07	Distal Intergenic	2129818	2133500	3683	-	CIL0946S0111
scaffold72237	2140733	2140744	12	strongHypo	-0.244	4.25e-05	Distal Intergenic	2129818	2133500	3683	-	CIL0946S0111
scaffold72237	2547881	2548286	406	strongHyper	0.245	1.98e-09	Intron (CIL0946S0133.mRNA/CIL0946S0133, intron 4 of 7)	2544205	2550780	6576	-	CIL0946S0133
scaffold72348	1497	1708	212	strongHypo	-0.107	0.00441	Distal Intergenic	181902	183961	2060	-	CIL0948S0005
scaffold72348	44702	44795	94	strongHypo	-0.325	3.06e-05	Distal Intergenic	181902	183961	2060	-	CIL0948S0005
scaffold72348	115922	116122	201	strongHyper	0.289	1.42e-14	Distal Intergenic	181902	183961	2060	-	CIL0948S0005
scaffold72348	175953	176515	563	strongHypo	-0.316	1.14e-15	Distal Intergenic	181902	183961	2060	-	CIL0948S0005
scaffold72348	204017	204073	57	strongHypo	-0.158	4.17e-09	Distal Intergenic	198908	200638	1731	-	CIL0948S0007
scaffold72348	205651	205715	65	strongHyper	0.154	0.000413	Distal Intergenic	198908	200638	1731	-	CIL0948S0007
scaffold72348	231654	231680	27	strongHyper	0.158	3.42e-06	Promoter (2-3kb)	234177	252930	18754	+	CIL0948S0011
scaffold72348	240385	240894	510	strongHyper	0.219	7.16e-15	Intron (CIL0948S0011.mRNA/CIL0948S0011, intron 3 of 5)	234177	252930	18754	+	CIL0948S0011
scaffold72348	245520	245563	44	strongHyper	0.186	0.000114	Intron (CIL0948S0011.mRNA/CIL0948S0011, intron 3 of 5)	234177	252930	18754	+	CIL0948S0011
scaffold72348	248292	248516	225	strongHyper	0.232	8.4e-13	Intron (CIL0948S0011.mRNA/CIL0948S0011, intron 3 of 5)	234177	252930	18754	+	CIL0948S0011
scaffold72348	376135	376258	124	strongHypo	-0.163	1.59e-06	Intron (CIL0948S0018.mRNA/CIL0948S0018, intron 3 of 11)	363100	399546	36447	+	CIL0948S0018
scaffold72348	402034	402074	41	strongHypo	-0.302	1.85e-05	Distal Intergenic	417148	420233	3086	+	CIL0948S0019
scaffold72348	415399	415903	505	strongHypo	-0.143	4.33e-09	Promoter (1-2kb)	417148	420233	3086	+	CIL0948S0019
scaffold72348	453146	453255	110	strongHyper	0.22	9.58e-06	Distal Intergenic	460746	501577	40832	+	CIL0948S0021
scaffold72348	539037	539183	147	strongHypo	-0.28	1.01e-06	Intron (CIL0948S0027.mRNA/CIL0948S0027, intron 2 of 6)	536651	541330	4680	+	CIL0948S0027
scaffold72348	927096	927448	353	strongHypo	-0.101	0.000279	Intron (CIL0948S0048.mRNA/CIL0948S0048, intron 10 of 10)	922256	929881	7626	-	CIL0948S0048
scaffold72348	932200	932461	262	strongHyper	0.212	1.23e-11	Promoter (2-3kb)	922256	929881	7626	-	CIL0948S0048
scaffold72348	1007793	1007866	74	strongHypo	-0.221	2.05e-06	Intron (CIL0948S0053.mRNA/CIL0948S0053, intron 12 of 14)	1001451	1009535	8085	-	CIL0948S0053
scaffold72348	1018247	1018740	494	strongHyper	0.113	1.07e-06	Intron (CIL0948S0054.mRNA/CIL0948S0054, intron 5 of 9)	1001451	1009535	8085	-	CIL0948S0053
scaffold72348	1024273	1024414	142	strongHyper	0.22	1.69e-08	Intron (CIL0948S0054.mRNA/CIL0948S0054, intron 5 of 9)	1010580	1033573	22994	-	CIL0948S0054
scaffold72348	1154256	1154448	193	strongHypo	-0.25	9.59e-17	Distal Intergenic	1150704	1151384	681	+	CIL0948S0065
scaffold72348	1258228	1258265	38	strongHypo	-0.158	0.00179	Intron (CIL0948S0078.mRNA/CIL0948S0078, intron 4 of 6)	1253802	1264795	10994	+	CIL0948S0078
scaffold72348	1280593	1281006	414	strongHyper	0.118	4.88e-06	Distal Intergenic	1271094	1272386	1293	-	CIL0948S0080
scaffold72348	1301060	1301333	274	strongHyper	0.113	0.00236	Intron (CIL0948S0082.mRNA/CIL0948S0082, intron 3 of 8)	1297889	1307541	9653	-	CIL0948S0082
scaffold72348	1422397	1422430	34	strongHypo	-0.218	2.17e-07	Promoter (1-2kb)	1419927	1421304	1378	-	CIL0948S0106
scaffold72348	1472036	1472183	148	strongHyper	0.215	9.4e-05	Promoter (<=1kb)	1472528	1485999	13472	+	CIL0948S0113
scaffold72348	1503792	1503830	39	strongHyper	0.416	5.35e-11	Intron (CIL0948S0116.mRNA/CIL0948S0116, intron 8 of 13)	1498465	1509451	10987	+	CIL0948S0116
scaffold72348	1504060	1504252	193	strongHyper	0.262	4.93e-11	Intron (CIL0948S0116.mRNA/CIL0948S0116, intron 8 of 13)	1498465	1509451	10987	+	CIL0948S0116
scaffold72348	1506163	1506247	85	strongHyper	0.12	4.41e-05	Intron (CIL0948S0116.mRNA/CIL0948S0116, intron 8 of 13)	1498465	1509451	10987	+	CIL0948S0116
scaffold72348	1509658	1509722	65	strongHyper	0.191	3.15e-05	Distal Intergenic	1519337	1520894	1558	-	CIL0948S0119
scaffold72348	1665108	1665122	15	strongHypo	-0.402	8.3e-10	Promoter (1-2kb)	1660711	1663797	3087	-	CIL0948S0147
scaffold72348	1685219	1685227	9	strongHyper	0.5	9.34e-14	Intron (CIL0948S0148.mRNA/CIL0948S0148, intron 8 of 21)	1680113	1691752	11640	+	CIL0948S0148
scaffold72348	1816286	1816535	250	strongHyper	0.102	0.00233	Distal Intergenic	1817359	1823627	6269	-	CIL0948S0157
scaffold72348	1830425	1830622	198	strongHyper	0.239	5.05e-09	Intron (CIL0948S0160.mRNA/CIL0948S0160, intron 3 of 5)	1827240	1832629	5390	-	CIL0948S0160
scaffold72348	1831391	1831398	8	strongHypo	-0.156	2.88e-05	Intron (CIL0948S0160.mRNA/CIL0948S0160, intron 4 of 5)	1827240	1832629	5390	-	CIL0948S0160
scaffold72348	1917822	1917905	84	strongHypo	-0.247	5.47e-06	Distal Intergenic	1929876	1933253	3378	+	CIL0948S0167
scaffold72348	2114374	2114409	36	strongHyper	0.261	4.35e-10	Distal Intergenic	2095581	2099412	3832	-	CIL0948S0187
scaffold72348	2126417	2126526	110	strongHyper	0.219	0.000168	Distal Intergenic	2131005	2132453	1449	-	CIL0948S0189
scaffold72348	2168274	2168358	85	strongHyper	0.189	5.74e-09	Promoter (1-2kb)	2170161	2170542	382	+	CIL0948S0196
scaffold72348	2267300	2267574	275	strongHypo	-0.185	0.000856	Promoter (1-2kb)	2261960	2265879	3920	-	CIL0948S0209
scaffold72348	2434198	2434577	380	strongHyper	0.101	4.73e-06	Intron (CIL0948S0229.mRNA/CIL0948S0229, intron 1 of 1)	2433540	2434943	1404	-	CIL0948S0229
scaffold72348	2435961	2436195	235	strongHypo	-0.121	0.00208	Promoter (1-2kb)	2433540	2434943	1404	-	CIL0948S0229
scaffold72348	2506853	2506923	71	strongHyper	0.184	0.000267	Promoter (1-2kb)	2508282	2508710	429	+	CIL0948S0237
scaffold72348	2578837	2579041	205	strongHypo	-0.105	0.0066	Promoter (1-2kb)	2580295	2580750	456	+	CIL0948S0245
scaffold72459	57514	57533	20	strongHyper	0.303	4.89e-06	Promoter (2-3kb)	60509	67001	6493	+	CIL0951S0007
scaffold72459	248392	248565	174	strongHypo	-0.102	0.026	Distal Intergenic	288422	296912	8491	-	CIL0951S0023
scaffold72459	386398	386568	171	strongHyper	0.136	6.85e-06	Distal Intergenic	384702	385667	966	+	CIL0951S0028
scaffold72459	413768	413871	104	strongHyper	0.252	1.63e-08	Promoter (<=1kb)	406636	412996	6361	-	CIL0951S0031
scaffold72459	417673	417787	115	strongHyper	0.19	0.000119	Distal Intergenic	406636	412996	6361	-	CIL0951S0031
scaffold72459	433472	433622	151	strongHyper	0.22	6.52e-07	Promoter (2-3kb)	436194	436619	426	+	CIL0951S0033
scaffold72459	541369	541411	43	strongHyper	0.236	3.74e-05	Promoter (<=1kb)	542288	547519	5232	+	CIL0951S0043
scaffold72459	552981	553100	120	strongHypo	-0.103	0.0046	Distal Intergenic	542288	547519	5232	+	CIL0951S0043
scaffold72459	570470	570725	256	strongHypo	-0.172	0.000119	Intron (CIL0951S0044.mRNA/CIL0951S0044, intron 5 of 14)	564933	579317	14385	+	CIL0951S0044
scaffold72459	598825	598845	21	strongHyper	0.204	0.000125	Intron (CIL0951S0045.mRNA/CIL0951S0045, intron 2 of 11)	596431	606920	10490	-	CIL0951S0045
scaffold72459	637951	638229	279	strongHypo	-0.103	1.09e-05	Promoter (2-3kb)	632561	635606	3046	-	CIL0951S0048
scaffold72459	834641	834709	69	strongHypo	-0.148	7.97e-07	Promoter (<=1kb)	835115	837439	2325	+	CIL0951S0063
scaffold72459	895755	895915	161	strongHyper	0.169	7.78e-06	Distal Intergenic	888115	892896	4782	-	CIL0951S0067
scaffold72459	941728	941746	19	strongHypo	-0.178	1.48e-06	Distal Intergenic	949249	951833	2585	+	CIL0951S0068
scaffold72459	1054672	1054861	190	strongHypo	-0.111	0.000177	Distal Intergenic	1036973	1040061	3089	+	CIL0951S0080
scaffold72459	1088677	1088722	46	strongHyper	0.21	0.0023	Promoter (<=1kb)	1082357	1087959	5603	-	CIL0951S0082
scaffold72459	1107738	1107808	71	strongHyper	0.104	0.0153	Intron (CIL0951S0084.mRNA/CIL0951S0084, intron 10 of 13)	1103113	1111887	8775	-	CIL0951S0084
scaffold72459	1211271	1211350	80	strongHyper	0.298	8.61e-08	Distal Intergenic	1214650	1221770	7121	-	CIL0951S0089
scaffold72459	1443151	1443273	123	strongHyper	0.18	1.73e-07	Distal Intergenic	1474600	1496597	21998	+	CIL0951S0098
scaffold72459	1449320	1449455	136	strongHyper	0.26	4.87e-18	Distal Intergenic	1474600	1496597	21998	+	CIL0951S0098
scaffold72459	1467200	1467372	173	strongHyper	0.153	3.01e-06	Distal Intergenic	1474600	1496597	21998	+	CIL0951S0098
scaffold72459	1483938	1484092	155	strongHypo	-0.216	3.42e-07	Intron (CIL0951S0098.mRNA/CIL0951S0098, intron 7 of 20)	1474600	1496597	21998	+	CIL0951S0098
scaffold72459	1488362	1488377	16	strongHypo	-0.329	2.18e-06	Intron (CIL0951S0098.mRNA/CIL0951S0098, intron 11 of 20)	1474600	1496597	21998	+	CIL0951S0098
scaffold72459	1518127	1518315	189	strongHyper	0.197	5.13e-06	Intron (CIL0951S0099.mRNA/CIL0951S0099, intron 2 of 10)	1515955	1538146	22192	+	CIL0951S0099
scaffold72459	1525824	1525891	68	strongHypo	-0.109	9.93e-05	Intron (CIL0951S0099.mRNA/CIL0951S0099, intron 8 of 10)	1515955	1538146	22192	+	CIL0951S0099
scaffold72459	1533281	1533437	157	strongHyper	0.16	3.33e-05	Intron (CIL0951S0099.mRNA/CIL0951S0099, intron 8 of 10)	1515955	1538146	22192	+	CIL0951S0099
scaffold72459	1554239	1554290	52	strongHyper	0.227	1e-08	Distal Intergenic	1515955	1538146	22192	+	CIL0951S0099
scaffold72459	1562222	1562469	248	strongHypo	-0.133	1.17e-05	Intron (CIL0951S0100.mRNA/CIL0951S0100, intron 1 of 7)	1556089	1603362	47274	-	CIL0951S0100
scaffold72459	1583406	1583549	144	strongHyper	0.196	2.63e-05	Intron (CIL0951S0100.mRNA/CIL0951S0100, intron 3 of 7)	1556089	1603362	47274	-	CIL0951S0100
scaffold72459	1592735	1592767	33	strongHypo	-0.216	5.9e-06	Intron (CIL0951S0100.mRNA/CIL0951S0100, intron 6 of 7)	1556089	1603362	47274	-	CIL0951S0100
scaffold72459	1600611	1600646	36	strongHyper	0.125	6.4e-06	Intron (CIL0951S0100.mRNA/CIL0951S0100, intron 7 of 7)	1556089	1603362	47274	-	CIL0951S0100
scaffold72459	1723446	1723498	53	strongHyper	0.255	1.4e-08	Exon (CIL0951S0107.mRNA/CIL0951S0107, exon 1 of 7)	1719288	1723536	4249	-	CIL0951S0107
scaffold72459	1727916	1727987	72	strongHyper	0.212	2.92e-07	Distal Intergenic	1719288	1723536	4249	-	CIL0951S0107
scaffold72459	1845293	1845303	11	strongHypo	-0.321	8.09e-09	Distal Intergenic	1856828	1859775	2948	+	CIL0951S0115
scaffold72459	2166546	2166571	26	strongHypo	-0.343	4.9e-06	Intron (CIL0951S0138.mRNA/CIL0951S0138, intron 4 of 4)	2175983	2180408	4426	+	CIL0951S0139
scaffold72459	2205207	2205313	107	strongHyper	0.109	0.00104	Distal Intergenic	2209196	2210447	1252	+	CIL0951S0141
scaffold72459	2401736	2401783	48	strongHyper	0.252	3.05e-08	Distal Intergenic	2391970	2392814	845	+	CIL0951S0156
scaffold72459	2412711	2412761	51	strongHypo	-0.15	2.16e-05	Distal Intergenic	2428839	2431965	3127	+	CIL0951S0158
scaffold72459	2417731	2417781	51	strongHyper	0.225	1.21e-05	Distal Intergenic	2428839	2431965	3127	+	CIL0951S0158
scaffold72459	2458401	2458417	17	strongHyper	0.327	5.28e-10	Distal Intergenic	2455887	2458348	2462	+	CIL0951S0160
scaffold72459	2465017	2465026	10	strongHypo	-0.158	6.44e-06	Distal Intergenic	2455887	2458348	2462	+	CIL0951S0160
scaffold72459	2551416	2551432	17	strongHyper	0.298	2.64e-06	Distal Intergenic	2578604	2584350	5747	+	CIL0951S0165
scaffold72459	2585608	2585675	68	strongHypo	-0.244	0.000146	Distal Intergenic	2578604	2584350	5747	+	CIL0951S0165
scaffold72459	2601816	2601854	39	strongHyper	0.277	9.97e-10	Distal Intergenic	2578604	2584350	5747	+	CIL0951S0165
scaffold72459	2609076	2609287	212	strongHyper	0.211	9.95e-08	Distal Intergenic	2578604	2584350	5747	+	CIL0951S0165
scaffold72459	2610399	2610631	233	strongHyper	0.138	3.91e-07	Distal Intergenic	2578604	2584350	5747	+	CIL0951S0165
scaffold72459	2617223	2617625	403	strongHyper	0.103	0.00128	Distal Intergenic	2578604	2584350	5747	+	CIL0951S0165
scaffold72459	2624611	2624788	178	strongHyper	0.108	3.49e-05	Distal Intergenic	2578604	2584350	5747	+	CIL0951S0165
scaffold72459	2625295	2625367	73	strongHyper	0.169	0.000301	Distal Intergenic	2578604	2584350	5747	+	CIL0951S0165
scaffold72459	2626387	2626807	421	strongHyper	0.135	3.48e-07	Distal Intergenic	2578604	2584350	5747	+	CIL0951S0165
scaffold72459	2644094	2644136	43	strongHyper	0.126	9.16e-05	Distal Intergenic	2578604	2584350	5747	+	CIL0951S0165
scaffold72459	2673170	2673203	34	strongHyper	0.125	9.44e-09	Distal Intergenic	2578604	2584350	5747	+	CIL0951S0165
scaffold72459	2717941	2717985	45	strongHyper	0.165	3.28e-26	Distal Intergenic	2811463	2815479	4017	-	CIL0951S0170
scaffold72459	2805486	2805617	132	strongHypo	-0.373	5.38e-30	Distal Intergenic	2811463	2815479	4017	-	CIL0951S0170
scaffold72459	2806146	2806358	213	strongHypo	-0.12	0.00206	Distal Intergenic	2811463	2815479	4017	-	CIL0951S0170
scaffold72459	2890089	2890163	75	strongHyper	0.12	3.36e-05	Distal Intergenic	2846312	2848952	2641	-	CIL0951S0173
scaffold72459	2925211	2925248	38	strongHyper	0.284	1.61e-10	Distal Intergenic	2846312	2848952	2641	-	CIL0951S0173
scaffold72459	2930422	2930455	34	strongHyper	0.298	1.12e-11	Distal Intergenic	2846312	2848952	2641	-	CIL0951S0173
scaffold72459	3151160	3151218	59	strongHypo	-0.225	6.08e-07	Distal Intergenic	3118617	3121159	2543	-	CIL0951S0179
scaffold72459	3151541	3151833	293	strongHypo	-0.147	0.000148	Distal Intergenic	3118617	3121159	2543	-	CIL0951S0179
scaffold72459	3182917	3183143	227	strongHypo	-0.117	0.0042	Distal Intergenic	3118617	3121159	2543	-	CIL0951S0179
scaffold72571	22060	22075	16	strongHyper	0.382	9.28e-07	Intron (CIL0953S0002.mRNA/CIL0953S0002, intron 2 of 2)	16335	31411	15077	-	CIL0953S0002
scaffold72571	67475	67565	91	strongHypo	-0.166	2.08e-07	Distal Intergenic	58207	61625	3419	+	CIL0953S0003
scaffold72571	85870	86156	287	strongHypo	-0.127	0.000615	Distal Intergenic	76271	77981	1711	-	CIL0953S0004
scaffold72571	87375	87425	51	strongHyper	0.214	0.000408	Distal Intergenic	91063	96785	5723	-	CIL0953S0005
scaffold72571	103882	104125	244	strongHyper	0.105	0.00821	Distal Intergenic	91063	96785	5723	-	CIL0953S0005
scaffold72571	198424	198458	35	strongHypo	-0.269	9.62e-07	Distal Intergenic	243912	244597	686	-	CIL0953S0007
scaffold72571	351257	351585	329	strongHyper	0.164	8.31e-07	Distal Intergenic	354444	368368	13925	+	CIL0953S0012
scaffold72571	352500	352718	219	strongHypo	-0.196	1.33e-06	Promoter (1-2kb)	354444	368368	13925	+	CIL0953S0012
scaffold72571	468049	468130	82	strongHypo	-0.152	0.00132	Distal Intergenic	458262	464920	6659	+	CIL0953S0025
scaffold72571	469662	469676	15	strongHypo	-0.172	0.00378	Distal Intergenic	458262	464920	6659	+	CIL0953S0025
scaffold72571	523318	523505	188	strongHyper	0.202	2.4e-06	Intron (CIL0953S0032.mRNA/CIL0953S0032, intron 5 of 8)	518286	526799	8514	+	CIL0953S0032
scaffold72571	590176	590217	42	strongHypo	-0.236	2.61e-07	Promoter (2-3kb)	586506	587990	1485	-	CIL0953S0037
scaffold72571	625541	625627	87	strongHypo	-0.236	7.11e-06	Distal Intergenic	610481	615894	5414	-	CIL0953S0039
scaffold72571	737488	737879	392	strongHypo	-0.224	1.09e-05	Distal Intergenic	736498	737250	753	+	CIL0953S0046
scaffold72571	887863	887949	87	strongHypo	-0.208	8.23e-07	Distal Intergenic	874703	878834	4132	+	CIL0953S0051
scaffold72571	904927	905031	105	strongHyper	0.127	0.0101	Exon (CIL0953S0053.mRNA/CIL0953S0053, exon 2 of 3)	903447	907670	4224	-	CIL0953S0053
scaffold72571	958696	958711	16	strongHypo	-0.388	6.97e-08	Distal Intergenic	964590	966314	1725	+	CIL0953S0055
scaffold72571	967723	967768	46	strongHyper	0.302	3.04e-06	Distal Intergenic	964590	966314	1725	+	CIL0953S0055
scaffold72571	991766	991877	112	strongHypo	-0.272	2.52e-07	Distal Intergenic	992881	994895	2015	-	CIL0953S0058
scaffold72571	1022723	1022765	43	strongHyper	0.178	2.58e-06	Exon (CIL0953S0061.mRNA/CIL0953S0061, exon 1 of 1)	1021698	1022828	1131	-	CIL0953S0061
scaffold72571	1074289	1074305	17	strongHypo	-0.234	9.76e-09	Intron (CIL0953S0064.mRNA/CIL0953S0064, intron 4 of 8)	1055522	1060854	5333	-	CIL0953S0063
scaffold72571	1088092	1088164	73	strongHypo	-0.263	4.29e-05	Intron (CIL0953S0064.mRNA/CIL0953S0064, intron 6 of 8)	1069211	1096523	27313	-	CIL0953S0064
scaffold72571	1165131	1165441	311	strongHypo	-0.234	0.000322	Distal Intergenic	1143066	1143594	529	-	CIL0953S0066
scaffold72571	1612352	1612404	53	strongHypo	-0.22	0.00167	Distal Intergenic	1682079	1717905	35827	+	CIL0953S0080
scaffold72571	1667929	1667983	55	strongHypo	-0.181	0.000958	Distal Intergenic	1682079	1717905	35827	+	CIL0953S0080
scaffold72571	1693316	1693409	94	strongHyper	0.116	8.69e-07	Intron (CIL0953S0080.mRNA/CIL0953S0080, intron 11 of 19)	1682079	1717905	35827	+	CIL0953S0080
scaffold72571	1697960	1697968	9	strongHyper	0.3	5.02e-05	Intron (CIL0953S0080.mRNA/CIL0953S0080, intron 11 of 19)	1682079	1717905	35827	+	CIL0953S0080
scaffold72571	1710731	1710740	10	strongHyper	0.468	1.41e-12	Intron (CIL0953S0080.mRNA/CIL0953S0080, intron 16 of 19)	1682079	1717905	35827	+	CIL0953S0080
scaffold72571	1813077	1813396	320	strongHypo	-0.107	0.00314	Distal Intergenic	1830040	1830361	322	-	CIL0953S0088
scaffold72571	1826880	1827154	275	strongHyper	0.236	3.89e-16	Distal Intergenic	1830040	1830361	322	-	CIL0953S0088
scaffold72571	1863918	1863990	73	strongHyper	0.208	6e-05	Intron (CIL0953S0089.mRNA/CIL0953S0089, intron 8 of 13)	1830040	1830361	322	-	CIL0953S0088
scaffold72571	1941019	1941093	75	strongHyper	0.217	0.0183	Intron (CIL0953S0090.mRNA/CIL0953S0090, intron 9 of 11)	1903891	1960234	56344	-	CIL0953S0090
scaffold72571	1996382	1996458	77	strongHyper	0.229	2.24e-05	Distal Intergenic	2008953	2012420	3468	-	CIL0953S0093
scaffold72571	2114185	2114847	663	strongHypo	-0.128	2.38e-07	Exon (CIL0953S0099.mRNA/CIL0953S0099, exon 5 of 6)	2111038	2116653	5616	-	CIL0953S0099
scaffold72571	2148274	2148419	146	strongHyper	0.118	2.34e-06	Distal Intergenic	2140603	2143599	2997	-	CIL0953S0101
scaffold72571	2249351	2249514	164	strongHypo	-0.215	5.04e-11	Distal Intergenic	2238064	2238270	207	+	CIL0953S0111
scaffold72571	2380417	2380471	55	strongHypo	-0.148	1.91e-06	Intron (CIL0953S0116.mRNA/CIL0953S0116, intron 1 of 13)	2379562	2396966	17405	+	CIL0953S0116
scaffold72571	2382009	2382288	280	strongHyper	0.147	1.14e-07	Intron (CIL0953S0116.mRNA/CIL0953S0116, intron 3 of 13)	2379562	2396966	17405	+	CIL0953S0116
scaffold72682	10490	10505	16	strongHypo	-0.412	1.14e-12	Distal Intergenic	5834	9035	3202	+	CIL0957S0001
scaffold72682	51721	51733	13	strongHyper	0.184	3.09e-05	Distal Intergenic	93868	95032	1165	-	CIL0957S0003
scaffold72682	441812	441845	34	strongHyper	0.252	3.09e-06	Intron (CIL0957S0011.mRNA/CIL0957S0011, intron 6 of 6)	432634	447916	15283	-	CIL0957S0011
scaffold72682	690271	690309	39	strongHyper	0.268	0.000261	Distal Intergenic	684396	688800	4405	+	CIL0957S0031
scaffold72682	801721	801950	230	strongHyper	0.272	6.63e-13	Distal Intergenic	798920	800770	1851	+	CIL0957S0047
scaffold72682	921215	921537	323	strongHypo	-0.139	0.0122	Distal Intergenic	921917	925493	3577	-	CIL0957S0066
scaffold72682	932892	932942	51	strongHypo	-0.11	0.00571	Intron (CIL0957S0068.mRNA/CIL0957S0068, intron 8 of 8)	928885	933174	4290	-	CIL0957S0068
scaffold72682	1198483	1198746	264	strongHypo	-0.113	0.000239	Intron (CIL0957S0083.mRNA/CIL0957S0083, intron 2 of 3)	1194065	1203273	9209	-	CIL0957S0083
scaffold72682	1218560	1218641	82	strongHyper	0.158	1.08e-06	Intron (CIL0957S0084.mRNA/CIL0957S0084, intron 2 of 3)	1213860	1229360	15501	-	CIL0957S0084
scaffold72682	1219075	1219300	226	strongHypo	-0.154	0.00217	Intron (CIL0957S0084.mRNA/CIL0957S0084, intron 2 of 3)	1213860	1229360	15501	-	CIL0957S0084
scaffold72682	1274976	1275137	162	strongHypo	-0.162	0.000422	Promoter (<=1kb)	1263455	1274638	11184	-	CIL0957S0086
scaffold72682	1304446	1304538	93	strongHypo	-0.195	0.00401	Intron (CIL0957S0089.mRNA/CIL0957S0089, intron 1 of 2)	1300756	1313070	12315	-	CIL0957S0089
scaffold72682	1310417	1310424	8	strongHyper	0.276	3.34e-05	Intron (CIL0957S0089.mRNA/CIL0957S0089, intron 1 of 2)	1300756	1313070	12315	-	CIL0957S0089
scaffold72682	1317637	1317904	268	strongHyper	0.148	3.43e-06	Intron (CIL0957S0090.mRNA/CIL0957S0090, intron 2 of 3)	1313283	1327309	14027	+	CIL0957S0090
scaffold72682	1324908	1325023	116	strongHyper	0.222	8.82e-09	Intron (CIL0957S0090.mRNA/CIL0957S0090, intron 3 of 3)	1332361	1336353	3993	+	CIL0957S0091
scaffold72682	1344105	1344131	27	strongHyper	0.239	3.61e-08	Intron (CIL0957S0092.mRNA/CIL0957S0092, intron 3 of 6)	1332361	1336353	3993	+	CIL0957S0091
scaffold72682	1345236	1345419	184	strongHypo	-0.121	1.25e-05	Intron (CIL0957S0092.mRNA/CIL0957S0092, intron 3 of 6)	1332361	1336353	3993	+	CIL0957S0091
scaffold72682	1345568	1345642	75	strongHyper	0.151	0.000432	Intron (CIL0957S0092.mRNA/CIL0957S0092, intron 3 of 6)	1332361	1336353	3993	+	CIL0957S0091
scaffold72682	1354526	1354821	296	strongHyper	0.146	3.02e-13	Intron (CIL0957S0092.mRNA/CIL0957S0092, intron 5 of 6)	1337845	1362647	24803	-	CIL0957S0092
scaffold72682	1357339	1357520	182	strongHyper	0.109	0.000389	Intron (CIL0957S0092.mRNA/CIL0957S0092, intron 5 of 6)	1337845	1362647	24803	-	CIL0957S0092
scaffold72682	1401936	1402128	193	strongHypo	-0.205	5.17e-08	Distal Intergenic	1418731	1423888	5158	+	CIL0957S0096
scaffold72682	1403525	1403798	274	strongHypo	-0.107	0.000264	Distal Intergenic	1418731	1423888	5158	+	CIL0957S0096
scaffold72682	1426454	1426540	87	strongHyper	0.273	6.98e-07	3' UTR	1425854	1433953	8100	-	CIL0957S0097
scaffold72682	1432004	1432103	100	strongHyper	0.109	0.00458	Intron (CIL0957S0097.mRNA/CIL0957S0097, intron 2 of 2)	1425854	1433953	8100	-	CIL0957S0097
scaffold72682	1614607	1614640	34	strongHyper	0.287	1.25e-12	Promoter (1-2kb)	1608711	1612775	4065	-	CIL0957S0113
scaffold72682	1752473	1752619	147	strongHypo	-0.131	3.69e-05	Intron (CIL0957S0122.mRNA/CIL0957S0122, intron 9 of 13)	1764843	1765691	849	+	CIL0957S0123
scaffold72682	1754759	1754773	15	strongHypo	-0.289	9.47e-10	Intron (CIL0957S0122.mRNA/CIL0957S0122, intron 9 of 13)	1764843	1765691	849	+	CIL0957S0123
scaffold72682	1774641	1774681	41	strongHypo	-0.191	4.59e-06	Distal Intergenic	1764843	1765691	849	+	CIL0957S0123
scaffold72682	1807373	1807390	18	strongHypo	-0.32	2.03e-05	Distal Intergenic	1796057	1797077	1021	+	CIL0957S0126
scaffold72682	1852100	1852535	436	strongHypo	-0.221	2.85e-13	Distal Intergenic	1859123	1861085	1963	+	CIL0957S0131
scaffold72682	1894649	1894670	22	strongHyper	0.197	1.63e-05	Promoter (1-2kb)	1896144	1900205	4062	+	CIL0957S0134
scaffold72682	1953443	1953504	62	strongHypo	-0.232	8.69e-06	Distal Intergenic	1944647	1947663	3017	-	CIL0957S0138
scaffold72682	2053379	2053504	126	strongHyper	0.115	0.00111	Distal Intergenic	2044963	2053188	8226	+	CIL0957S0146
scaffold72682	2102293	2102595	303	strongHypo	-0.128	0.000446	Distal Intergenic	2068336	2070713	2378	-	CIL0957S0147
scaffold72682	2262233	2262557	325	strongHypo	-0.114	5.7e-05	Distal Intergenic	2318482	2319793	1312	+	CIL0957S0156
scaffold72682	2265032	2265088	57	strongHyper	0.299	1.97e-08	Distal Intergenic	2318482	2319793	1312	+	CIL0957S0156
scaffold72682	2286875	2286916	42	strongHypo	-0.29	0.00121	Distal Intergenic	2318482	2319793	1312	+	CIL0957S0156
scaffold72682	2287570	2287738	169	strongHyper	0.219	2.51e-06	Distal Intergenic	2318482	2319793	1312	+	CIL0957S0156
scaffold72682	2378255	2378473	219	strongHypo	-0.154	1.72e-06	Promoter (1-2kb)	2379749	2383370	3622	+	CIL0957S0162
scaffold72682	2445728	2445945	218	strongHypo	-0.199	1.5e-07	Promoter (2-3kb)	2448118	2458285	10168	+	CIL0957S0174
scaffold72682	2472037	2472166	130	strongHyper	0.347	3.82e-08	Intron (CIL0957S0177.mRNA/CIL0957S0177, intron 6 of 9)	2466104	2476717	10614	-	CIL0957S0177
scaffold72682	2613055	2613108	54	strongHyper	0.113	0.000274	Intron (CIL0957S0193.mRNA/CIL0957S0193, intron 10 of 14)	2606621	2617146	10526	+	CIL0957S0193
scaffold73459	7376	7409	34	strongHyper	0.263	8.16e-13	Distal Intergenic	11011	14439	3429	-	CIL0962S0001
scaffold73459	21264	22040	777	strongHyper	0.116	1.18e-13	Distal Intergenic	11011	14439	3429	-	CIL0962S0001
scaffold73459	25861	25876	16	strongHyper	0.168	0.000525	Distal Intergenic	11011	14439	3429	-	CIL0962S0001
scaffold73459	31157	31340	184	strongHyper	0.132	5.81e-05	Distal Intergenic	37576	51309	13734	+	CIL0962S0002
scaffold73459	39985	40179	195	strongHypo	-0.114	0.000426	Intron (CIL0962S0002.mRNA/CIL0962S0002, intron 2 of 5)	37576	51309	13734	+	CIL0962S0002
scaffold73459	42938	43199	262	strongHyper	0.167	0.000547	Intron (CIL0962S0002.mRNA/CIL0962S0002, intron 4 of 5)	37576	51309	13734	+	CIL0962S0002
scaffold73459	49695	49701	7	strongHypo	-0.234	0.000848	Intron (CIL0962S0002.mRNA/CIL0962S0002, intron 4 of 5)	61182	61657	476	+	CIL0962S0003
scaffold73459	76816	76883	68	strongHyper	0.225	1.19e-05	Distal Intergenic	83534	91733	8200	+	CIL0962S0005
scaffold73459	82763	82962	200	strongHyper	0.12	1.65e-05	Promoter (<=1kb)	83534	91733	8200	+	CIL0962S0005
scaffold73459	106539	106559	21	strongHyper	0.15	8.65e-05	Distal Intergenic	83534	91733	8200	+	CIL0962S0005
scaffold73459	113920	114156	237	strongHyper	0.106	4.75e-06	Distal Intergenic	83534	91733	8200	+	CIL0962S0005
scaffold73459	154518	154529	12	strongHypo	-0.336	1.92e-05	Distal Intergenic	163405	173472	10068	+	CIL0962S0009
scaffold73459	384222	384270	49	strongHyper	0.185	3.36e-06	Distal Intergenic	387862	389263	1402	+	CIL0962S0021
scaffold73459	597656	597828	173	strongHypo	-0.226	3.13e-05	Promoter (2-3kb)	600625	603041	2417	+	CIL0962S0027
scaffold73459	599182	599375	194	strongHypo	-0.168	1.41e-05	Promoter (1-2kb)	600625	603041	2417	+	CIL0962S0027
scaffold73459	648022	648480	459	strongHypo	-0.105	2.45e-05	Distal Intergenic	600625	603041	2417	+	CIL0962S0027
scaffold73459	859399	859490	92	strongHyper	0.185	7.64e-06	Distal Intergenic	843293	852945	9653	-	CIL0962S0038
scaffold73459	876507	876556	50	strongHyper	0.267	1.05e-07	Intron (CIL0962S0040.mRNA/CIL0962S0040, intron 6 of 10)	871863	889471	17609	-	CIL0962S0040
scaffold73459	909419	909680	262	strongHypo	-0.197	1.32e-06	Distal Intergenic	925117	936725	11609	+	CIL0962S0043
scaffold73459	932978	933318	341	strongHyper	0.154	3.12e-10	Intron (CIL0962S0043.mRNA/CIL0962S0043, intron 6 of 7)	925117	936725	11609	+	CIL0962S0043
scaffold73459	988681	988875	195	strongHyper	0.124	0.000466	Distal Intergenic	1017234	1017464	231	-	CIL0962S0046
scaffold73459	1014242	1014342	101	strongHypo	-0.175	0.0012	Distal Intergenic	1017234	1017464	231	-	CIL0962S0046
scaffold73459	1287054	1287403	350	strongHyper	0.158	1.05e-05	Distal Intergenic	1278842	1283314	4473	-	CIL0962S0060
scaffold73459	1311285	1311403	119	strongHypo	-0.152	0.00328	Promoter (1-2kb)	1305300	1309943	4644	-	CIL0962S0063
scaffold73459	1349690	1349887	198	strongHypo	-0.142	3.95e-05	Intron (CIL0962S0068.mRNA/CIL0962S0068, intron 2 of 8)	1342286	1355406	13121	-	CIL0962S0068
scaffold73459	1553735	1553748	14	strongHyper	0.32	2.13e-09	Exon (CIL0962S0094.mRNA/CIL0962S0094, exon 3 of 8)	1547912	1555272	7361	-	CIL0962S0094
scaffold73459	1606880	1607129	250	strongHypo	-0.103	0.000131	Intron (CIL0962S0102.mRNA/CIL0962S0102, intron 9 of 13)	1597172	1599330	2159	+	CIL0962S0101
scaffold73459	1615133	1615147	15	strongHyper	0.221	7.85e-05	Exon (CIL0962S0102.mRNA/CIL0962S0102, exon 3 of 14)	1600084	1617906	17823	-	CIL0962S0102
scaffold73459	2109601	2109616	16	strongHypo	-0.398	1.99e-19	Exon (CIL0962S0141.mRNA/CIL0962S0141, exon 4 of 4)	2104687	2109737	5051	+	CIL0962S0141
scaffold73459	2148889	2148983	95	strongHypo	-0.265	0.000254	Promoter (<=1kb)	2148919	2149191	273	+	CIL0962S0144
scaffold73459	2164714	2164784	71	strongHypo	-0.101	4.39e-05	Distal Intergenic	2148919	2149191	273	+	CIL0962S0144
scaffold73459	2198409	2198442	34	strongHyper	0.157	0.00182	Promoter (2-3kb)	2195237	2196234	998	-	CIL0962S0146
scaffold73459	2263375	2263388	14	strongHypo	-0.299	4.32e-06	Distal Intergenic	2228274	2230090	1817	-	CIL0962S0148
scaffold73459	2335735	2335780	46	strongHypo	-0.147	0.00191	Distal Intergenic	2324956	2326594	1639	-	CIL0962S0151
scaffold73459	2394490	2394498	9	strongHyper	0.256	3.54e-06	Exon (CIL0962S0158.mRNA/CIL0962S0158, exon 8 of 13)	2391894	2397850	5957	-	CIL0962S0158
scaffold73459	2412443	2412537	95	strongHypo	-0.209	0.000182	Distal Intergenic	2415532	2423207	7676	-	CIL0962S0159
scaffold73570	111981	112007	27	strongHypo	-0.298	1.25e-09	Exon (CIL0967S0010.mRNA/CIL0967S0010, exon 2 of 6)	109803	112382	2580	-	CIL0967S0010
scaffold73570	125844	126103	260	strongHyper	0.114	7.4e-05	Intron (CIL0967S0012.mRNA/CIL0967S0012, intron 3 of 3)	115664	120316	4653	-	CIL0967S0011
scaffold73570	126448	126596	149	strongHyper	0.231	1.2e-07	Intron (CIL0967S0012.mRNA/CIL0967S0012, intron 3 of 3)	115664	120316	4653	-	CIL0967S0011
scaffold73570	257464	257475	12	strongHyper	0.282	1.98e-06	Exon (CIL0967S0026.mRNA/CIL0967S0026, exon 11 of 28)	252796	264993	12198	+	CIL0967S0026
scaffold73570	379943	379993	51	strongHypo	-0.178	0.0072	Intron (CIL0967S0038.mRNA/CIL0967S0038, intron 5 of 7)	375594	382787	7194	-	CIL0967S0038
scaffold73570	407800	408108	309	strongHyper	0.144	5.01e-06	Intron (CIL0967S0041.mRNA/CIL0967S0041, intron 3 of 6)	405046	411172	6127	+	CIL0967S0041
scaffold73570	416860	416953	94	strongHypo	-0.161	8.36e-06	Promoter (1-2kb)	412840	415238	2399	-	CIL0967S0042
scaffold73570	442777	442870	94	strongHypo	-0.204	1.5e-06	Distal Intergenic	444296	445103	808	-	CIL0967S0046
scaffold73570	617837	617852	16	strongHyper	0.539	4.23e-08	Distal Intergenic	602621	608871	6251	-	CIL0967S0068
scaffold73570	829737	829751	15	strongHyper	0.138	8.78e-09	Intron (CIL0967S0077.mRNA/CIL0967S0077, intron 1 of 1)	828510	831079	2570	-	CIL0967S0077
scaffold73570	878623	878700	78	strongHypo	-0.254	1.5e-05	Distal Intergenic	874743	878068	3326	+	CIL0967S0080
scaffold73570	931412	931493	82	strongHyper	0.21	3.76e-06	Distal Intergenic	969772	971729	1958	-	CIL0967S0083
scaffold73570	962571	962834	264	strongHypo	-0.106	0.00508	Distal Intergenic	969772	971729	1958	-	CIL0967S0083
scaffold73570	1016741	1016928	188	strongHypo	-0.145	5.39e-07	Distal Intergenic	1021429	1026177	4749	+	CIL0967S0090
scaffold73570	1095266	1095415	150	strongHypo	-0.305	2.84e-16	Promoter (2-3kb)	1091955	1093189	1235	-	CIL0967S0099
scaffold73570	1125638	1125773	136	strongHypo	-0.205	4.7e-05	Promoter (2-3kb)	1120049	1123658	3610	-	CIL0967S0102
scaffold73570	1206918	1207166	249	strongHypo	-0.222	7.02e-10	Distal Intergenic	1210351	1216935	6585	-	CIL0967S0108
scaffold73570	1495154	1495163	10	strongHypo	-0.297	8.07e-10	Exon (CIL0967S0136.mRNA/CIL0967S0136, exon 4 of 16)	1492371	1500674	8304	+	CIL0967S0136
scaffold73570	1879300	1879330	31	strongHyper	0.175	0.000146	Distal Intergenic	1871530	1871871	342	+	CIL0967S0164
scaffold73570	1890318	1890378	61	strongHypo	-0.125	0.00855	Distal Intergenic	1903188	1907046	3859	-	CIL0967S0165
scaffold73570	1916162	1916176	15	strongHypo	-0.136	8.08e-05	Promoter (1-2kb)	1911177	1914724	3548	-	CIL0967S0166
scaffold73570	2073045	2073424	380	strongHypo	-0.145	0.000508	Distal Intergenic	2075619	2076053	435	-	CIL0967S0193
scaffold73570	2117767	2117988	222	strongHyper	0.146	4.39e-10	Promoter (1-2kb)	2119194	2121020	1827	+	CIL0967S0199
scaffold73570	2127424	2127651	228	strongHypo	-0.12	0.000203	Intron (CIL0967S0200.mRNA/CIL0967S0200, intron 7 of 8)	2121928	2129314	7387	-	CIL0967S0200
scaffold73570	2199117	2199152	36	strongHypo	-0.253	0.000488	Distal Intergenic	2204348	2205634	1287	+	CIL0967S0206
scaffold73570	2199900	2199908	9	strongHyper	0.215	4.88e-08	Distal Intergenic	2204348	2205634	1287	+	CIL0967S0206
scaffold73570	2231468	2231539	72	strongHyper	0.216	1.36e-05	Promoter (2-3kb)	2233717	2240155	6439	+	CIL0967S0209
scaffold73570	2240621	2240789	169	strongHyper	0.143	1.91e-21	Distal Intergenic	2233717	2240155	6439	+	CIL0967S0209
scaffold73570	2491037	2491126	90	strongHyper	0.247	1.54e-07	Distal Intergenic	2477161	2479711	2551	-	CIL0967S0236
scaffold73570	2491319	2491340	22	strongHypo	-0.242	1.05e-06	Distal Intergenic	2477161	2479711	2551	-	CIL0967S0236
scaffold73682	46218	46311	94	strongHyper	0.167	0.00208	Distal Intergenic	36236	36973	738	-	CIL0970S0002
scaffold73682	49848	49920	73	strongHypo	-0.129	0.0476	Distal Intergenic	36236	36973	738	-	CIL0970S0002
scaffold73682	164426	164615	190	strongHyper	0.1	0.00189	Distal Intergenic	179310	180069	760	-	CIL0970S0007
scaffold73682	283742	283955	214	strongHypo	-0.207	2.33e-07	Intron (CIL0970S0019.mRNA/CIL0970S0019, intron 10 of 12)	267647	287709	20063	-	CIL0970S0019
scaffold73682	290893	290941	49	strongHyper	0.225	0.0135	Distal Intergenic	267647	287709	20063	-	CIL0970S0019
scaffold73682	292049	292311	263	strongHyper	0.104	0.0333	Distal Intergenic	267647	287709	20063	-	CIL0970S0019
scaffold73682	330955	330990	36	strongHypo	-0.102	0.0383	Distal Intergenic	336368	337792	1425	-	CIL0970S0024
scaffold73682	377555	377667	113	strongHyper	0.187	2.56e-11	Intron (CIL0970S0029.mRNA/CIL0970S0029, intron 7 of 10)	381451	386672	5222	+	CIL0970S0030
scaffold73682	473768	473867	100	strongHyper	0.157	0.00108	Promoter (<=1kb)	472568	473781	1214	-	CIL0970S0042
scaffold73682	485300	485543	244	strongHyper	0.157	4.97e-06	Distal Intergenic	492115	497659	5545	+	CIL0970S0043
scaffold73682	794966	795151	186	strongHypo	-0.121	0.00947	Distal Intergenic	808998	820653	11656	+	CIL0970S0058
scaffold73682	862155	862326	172	strongHyper	0.355	1.06e-05	Intron (CIL0970S0061.mRNA/CIL0970S0061, intron 1 of 6)	859455	861050	1596	+	CIL0970S0060
scaffold73682	959665	959679	15	strongHypo	-0.188	4.78e-05	Distal Intergenic	971707	981383	9677	+	CIL0970S0068
scaffold73682	975021	975415	395	strongHypo	-0.108	2.2e-05	Intron (CIL0970S0068.mRNA/CIL0970S0068, intron 4 of 11)	971707	981383	9677	+	CIL0970S0068
scaffold73682	1016252	1016265	14	strongHypo	-0.307	2.1e-06	Intron (CIL0970S0070.mRNA/CIL0970S0070, intron 6 of 8)	1010122	1018517	8396	-	CIL0970S0070
scaffold73682	1219926	1220013	88	strongHypo	-0.238	4.69e-07	Distal Intergenic	1224866	1225324	459	+	CIL0970S0091
scaffold73682	1272173	1272394	222	strongHypo	-0.168	1.65e-13	Distal Intergenic	1270025	1271690	1666	+	CIL0970S0098
scaffold73682	1466420	1466446	27	strongHyper	0.175	8.86e-06	Intron (CIL0970S0122.mRNA/CIL0970S0122, intron 1 of 1)	1464590	1467976	3387	-	CIL0970S0122
scaffold73682	1495470	1495492	23	strongHyper	0.224	1.86e-05	Intron (CIL0970S0123.mRNA/CIL0970S0123, intron 1 of 45)	1474104	1566310	92207	+	CIL0970S0123
scaffold73682	1574409	1574615	207	strongHyper	0.229	1.38e-08	Intron (CIL0970S0124.mRNA/CIL0970S0124, intron 4 of 11)	1567489	1584994	17506	+	CIL0970S0124
scaffold73682	1591047	1591084	38	strongHyper	0.224	7.78e-06	Intron (CIL0970S0125.mRNA/CIL0970S0125, intron 10 of 11)	1585570	1592945	7376	-	CIL0970S0125
scaffold73682	1633380	1633649	270	strongHypo	-0.116	3.33e-07	Promoter (2-3kb)	1629465	1631194	1730	-	CIL0970S0131
scaffold73682	1658512	1658602	91	strongHyper	0.103	0.0334	Intron (CIL0970S0133.mRNA/CIL0970S0133, intron 5 of 8)	1654861	1666669	11809	+	CIL0970S0133
scaffold73682	1757572	1757617	46	strongHyper	0.117	0.0164	Distal Intergenic	1772552	1776507	3956	+	CIL0970S0140
scaffold73682	1781306	1781520	215	strongHypo	-0.192	6.31e-05	Promoter (2-3kb)	1784056	1785242	1187	+	CIL0970S0141
scaffold73793	10346	10354	9	strongHyper	0.359	6.06e-05	Exon (CIL0972S0001.mRNA/CIL0972S0001, exon 4 of 4)	9433	10378	946	+	CIL0972S0001
scaffold73793	56922	57008	87	strongHyper	0.155	0.000161	Distal Intergenic	12736	16569	3834	+	CIL0972S0002
scaffold73793	100000	100068	69	strongHypo	-0.106	0.00238	Distal Intergenic	107622	110471	2850	-	CIL0972S0006
scaffold73793	335200	335381	182	strongHypo	-0.119	3.22e-09	Distal Intergenic	316554	317111	558	-	CIL0972S0016
scaffold73793	376442	376465	24	strongHyper	0.202	3.24e-06	Distal Intergenic	403350	403580	231	+	CIL0972S0019
scaffold73793	395252	395455	204	strongHypo	-0.243	2.33e-08	Distal Intergenic	403350	403580	231	+	CIL0972S0019
scaffold73793	403708	403719	12	strongHypo	-0.324	1.34e-07	Promoter (<=1kb)	403781	406240	2460	+	CIL0972S0020
scaffold73793	458124	458210	87	strongHypo	-0.288	6.76e-06	Distal Intergenic	451165	452890	1726	+	CIL0972S0023
scaffold73793	467865	468145	281	strongHypo	-0.155	5.98e-05	Distal Intergenic	475984	477840	1857	+	CIL0972S0026
scaffold73793	562557	562607	51	strongHyper	0.293	9.05e-06	Promoter (2-3kb)	565050	568643	3594	+	CIL0972S0032
scaffold73793	694050	694060	11	strongHyper	0.252	4.18e-09	Exon (CIL0972S0041.mRNA/CIL0972S0041, exon 4 of 13)	691563	712834	21272	+	CIL0972S0041
scaffold73793	969633	969850	218	strongHyper	0.104	0.0113	Intron (CIL0972S0059.mRNA/CIL0972S0059, intron 13 of 19)	974812	976689	1878	+	CIL0972S0060
scaffold73793	1025672	1025681	10	strongHypo	-0.364	3.13e-07	Intron (CIL0972S0066.mRNA/CIL0972S0066, intron 5 of 8)	1020498	1032961	12464	+	CIL0972S0066
scaffold73793	1043761	1044094	334	strongHypo	-0.255	1.07e-21	Intron (CIL0972S0068.mRNA/CIL0972S0068, intron 8 of 14)	1034836	1048953	14118	-	CIL0972S0068
scaffold73793	1070399	1070853	455	strongHypo	-0.126	1.41e-06	Intron (CIL0972S0069.mRNA/CIL0972S0069, intron 3 of 15)	1059677	1092513	32837	+	CIL0972S0069
scaffold73793	1304710	1304814	105	strongHyper	0.261	5.32e-07	Distal Intergenic	1316019	1318011	1993	+	CIL0972S0077
scaffold73793	1326428	1326737	310	strongHyper	0.152	8.41e-13	Distal Intergenic	1316019	1318011	1993	+	CIL0972S0077
scaffold73793	1807583	1807791	209	strongHypo	-0.107	2.29e-05	Distal Intergenic	1821986	1822204	219	+	CIL0972S0104
scaffold73793	1828756	1828865	110	strongHypo	-0.132	9.34e-08	Distal Intergenic	1821986	1822204	219	+	CIL0972S0104
scaffold73793	1994114	1994324	211	strongHyper	0.122	4.2e-06	Distal Intergenic	1972744	1973436	693	+	CIL0972S0114
scaffold73793	2003440	2003568	129	strongHypo	-0.169	1.03e-07	Distal Intergenic	2019950	2024287	4338	+	CIL0972S0116
scaffold73793	2050792	2050927	136	strongHyper	0.134	1.57e-12	Distal Intergenic	2047320	2049720	2401	+	CIL0972S0120
scaffold73793	2137519	2137725	207	strongHypo	-0.142	3.48e-05	Intron (CIL0972S0127.mRNA/CIL0972S0127, intron 15 of 21)	2114049	2142731	28683	-	CIL0972S0127
scaffold73793	2229991	2230106	116	strongHyper	0.135	3.87e-07	Distal Intergenic	2225956	2227542	1587	+	CIL0972S0132
scaffold73793	2253832	2254472	641	strongHyper	0.121	9.05e-09	Intron (CIL0972S0135.mRNA/CIL0972S0135, intron 1 of 1)	2251681	2258876	7196	-	CIL0972S0135
scaffold73793	2287901	2288017	117	strongHypo	-0.133	0.00028	Distal Intergenic	2275395	2275760	366	-	CIL0972S0137
scaffold73793	2318171	2318460	290	strongHyper	0.101	0.000183	Promoter (1-2kb)	2319677	2324604	4928	+	CIL0972S0142
scaffold73904	94215	94344	130	strongHyper	0.15	0.00116	Distal Intergenic	70813	71622	810	+	CIL0974S0001
scaffold73904	124637	124855	219	strongHypo	-0.114	0.000171	Distal Intergenic	158580	163560	4981	+	CIL0974S0003
scaffold73904	207345	207605	261	strongHyper	0.105	0.00227	Intron (CIL0974S0004.mRNA/CIL0974S0004, intron 5 of 5)	201303	210972	9670	+	CIL0974S0004
scaffold73904	302347	302804	458	strongHyper	0.106	7.88e-07	Intron (CIL0974S0008.mRNA/CIL0974S0008, intron 5 of 5)	291458	304396	12939	-	CIL0974S0008
scaffold73904	359604	359805	202	strongHypo	-0.219	3.94e-05	Distal Intergenic	291458	304396	12939	-	CIL0974S0008
scaffold73904	453427	453793	367	strongHyper	0.135	0.00317	Distal Intergenic	528754	533666	4913	-	CIL0974S0020
scaffold73904	502593	502659	67	strongHyper	0.17	1.14e-05	Distal Intergenic	528754	533666	4913	-	CIL0974S0020
scaffold73904	552977	553175	199	strongHypo	-0.189	8.02e-08	Intron (CIL0974S0021.mRNA/CIL0974S0021, intron 2 of 6)	528754	533666	4913	-	CIL0974S0020
scaffold73904	621919	621992	74	strongHyper	0.136	2.68e-05	5' UTR	621595	624738	3144	+	CIL0974S0026
scaffold73904	785927	785957	31	strongHypo	-0.171	1.11e-07	Promoter (1-2kb)	784179	784469	291	-	CIL0974S0040
scaffold73904	831828	831834	7	strongHyper	0.27	3.07e-07	Exon (CIL0974S0044.mRNA/CIL0974S0044, exon 2 of 4)	828652	833696	5045	-	CIL0974S0044
scaffold73904	989323	989352	30	strongHypo	-0.199	0.00495	Distal Intergenic	1006799	1010810	4012	+	CIL0974S0056
scaffold73904	1152410	1152431	22	strongHypo	-0.238	2.39e-07	Intron (CIL0974S0058.mRNA/CIL0974S0058, intron 1 of 2)	1149613	1157132	7520	+	CIL0974S0058
scaffold73904	1267740	1267768	29	strongHyper	0.283	1.31e-05	Intron (CIL0974S0062.mRNA/CIL0974S0062, intron 1 of 7)	1264987	1285805	20819	-	CIL0974S0062
scaffold73904	1269231	1269418	188	strongHypo	-0.112	2.03e-06	Intron (CIL0974S0062.mRNA/CIL0974S0062, intron 1 of 7)	1264987	1285805	20819	-	CIL0974S0062
scaffold73904	1351011	1351060	50	strongHypo	-0.275	0.000139	Distal Intergenic	1360741	1361549	809	-	CIL0974S0064
scaffold73904	1387553	1387691	139	strongHypo	-0.29	2.01e-06	Distal Intergenic	1399025	1400058	1034	-	CIL0974S0069
scaffold73904	1620122	1620138	17	strongHyper	0.226	2.07e-07	Intron (CIL0974S0080.mRNA/CIL0974S0080, intron 6 of 6)	1608191	1622735	14545	+	CIL0974S0080
scaffold73904	1662254	1662447	194	strongHypo	-0.162	1.14e-06	Distal Intergenic	1685435	1687128	1694	+	CIL0974S0083
scaffold73904	1668189	1668215	27	strongHyper	0.184	3.49e-05	Distal Intergenic	1685435	1687128	1694	+	CIL0974S0083
scaffold73904	1687640	1687680	41	strongHypo	-0.25	1.96e-05	Distal Intergenic	1685435	1687128	1694	+	CIL0974S0083
scaffold73904	1775185	1775310	126	strongHyper	0.186	7e-06	Distal Intergenic	1755479	1773708	18230	+	CIL0974S0085
scaffold73904	1888384	1888908	525	strongHypo	-0.118	5.8e-05	Distal Intergenic	1878850	1880078	1229	+	CIL0974S0086
scaffold73904	2005984	2006309	326	strongHypo	-0.211	2.89e-10	Distal Intergenic	1997614	1999738	2125	+	CIL0974S0092
scaffold73904	2070089	2070216	128	strongHypo	-0.251	1.47e-06	Distal Intergenic	2084404	2096159	11756	+	CIL0974S0094
scaffold73904	2104374	2104758	385	strongHypo	-0.114	3.77e-06	Distal Intergenic	2107892	2112282	4391	+	CIL0974S0095
scaffold73904	2171281	2171409	129	strongHyper	0.222	0.00016	Distal Intergenic	2152732	2153407	676	-	CIL0974S0099
scaffold74015	13790	13797	8	strongHypo	-0.384	7.96e-08	Distal Intergenic	173123	176554	3432	-	CIL0976S0002
scaffold74015	458037	458064	28	strongHypo	-0.329	4.31e-06	Distal Intergenic	458121	459286	1166	-	CIL0976S0020
scaffold74015	464954	465048	95	strongHyper	0.18	6.07e-05	Distal Intergenic	458121	459286	1166	-	CIL0976S0020
scaffold74015	539272	539280	9	strongHypo	-0.264	9.68e-06	Intron (CIL0976S0023.mRNA/CIL0976S0023, intron 5 of 5)	535124	540965	5842	-	CIL0976S0023
scaffold74015	709620	709754	135	strongHypo	-0.113	0.000395	Distal Intergenic	754148	754850	703	+	CIL0976S0038
scaffold74015	730035	730118	84	strongHyper	0.118	0.00209	Distal Intergenic	754148	754850	703	+	CIL0976S0038
scaffold74015	731111	731286	176	strongHypo	-0.157	4.46e-08	Distal Intergenic	754148	754850	703	+	CIL0976S0038
scaffold74015	734249	734316	68	strongHyper	0.161	2.07e-06	Distal Intergenic	754148	754850	703	+	CIL0976S0038
scaffold74015	826346	826530	185	strongHyper	0.261	1.21e-05	Distal Intergenic	846554	854998	8445	+	CIL0976S0041
scaffold74015	849974	850056	83	strongHyper	0.106	0.000287	Intron (CIL0976S0041.mRNA/CIL0976S0041, intron 6 of 7)	846554	854998	8445	+	CIL0976S0041
scaffold74015	860680	861244	565	strongHypo	-0.103	8.42e-05	Distal Intergenic	868055	869155	1101	+	CIL0976S0042
scaffold74015	967699	967756	58	strongHyper	0.178	0.000107	Distal Intergenic	995060	1018684	23625	+	CIL0976S0045
scaffold74015	1000367	1000598	232	strongHyper	0.125	5.54e-06	Intron (CIL0976S0045.mRNA/CIL0976S0045, intron 3 of 11)	995060	1018684	23625	+	CIL0976S0045
scaffold74015	1011106	1011252	147	strongHyper	0.15	0.015	Intron (CIL0976S0045.mRNA/CIL0976S0045, intron 7 of 11)	995060	1018684	23625	+	CIL0976S0045
scaffold74015	1089756	1089835	80	strongHypo	-0.24	8.88e-07	Promoter (1-2kb)	1068669	1088542	19874	-	CIL0976S0046
scaffold74015	1106210	1106378	169	strongHyper	0.177	0.000666	Distal Intergenic	1068669	1088542	19874	-	CIL0976S0046
scaffold74015	1119140	1119225	86	strongHypo	-0.122	0.000357	Distal Intergenic	1142384	1148126	5743	-	CIL0976S0048
scaffold74015	1267247	1267452	206	strongHypo	-0.188	1.82e-06	Distal Intergenic	1299038	1302717	3680	+	CIL0976S0054
scaffold74015	1316747	1316876	130	strongHypo	-0.223	4.48e-09	Promoter (1-2kb)	1318247	1319934	1688	+	CIL0976S0060
scaffold74015	1354219	1354476	258	strongHyper	0.126	0.000305	Distal Intergenic	1357803	1362534	4732	+	CIL0976S0065
scaffold74015	1385721	1385742	22	strongHyper	0.243	8.03e-07	Distal Intergenic	1387189	1389527	2339	-	CIL0976S0069
scaffold74015	1766477	1766624	148	strongHypo	-0.263	5.66e-13	Promoter (<=1kb)	1767321	1771522	4202	+	CIL0976S0117
scaffold74015	2054756	2054789	34	strongHyper	0.181	8.85e-08	Distal Intergenic	2029658	2034168	4511	+	CIL0976S0143
scaffold74015	2070885	2071216	332	strongHypo	-0.145	0.000162	Intron (CIL0976S0145.mRNA/CIL0976S0145, intron 3 of 11)	2059138	2095149	36012	-	CIL0976S0145
scaffold74015	2210832	2210884	53	strongHypo	-0.141	0.00709	Distal Intergenic	2206591	2207181	591	+	CIL0976S0148
scaffold74015	2333889	2334036	148	strongHypo	-0.211	5.98e-05	Distal Intergenic	2336044	2341160	5117	-	CIL0976S0157
scaffold74015	2335146	2335243	98	strongHypo	-0.154	0.0006	Distal Intergenic	2336044	2341160	5117	-	CIL0976S0157
scaffold74126	38356	38525	170	strongHypo	-0.153	1.73e-09	Promoter (1-2kb)	39818	46098	6281	+	CIL0978S0005
scaffold74126	122061	122260	200	strongHyper	0.162	0.000211	Distal Intergenic	129350	130495	1146	-	CIL0978S0018
scaffold74126	124532	124783	252	strongHyper	0.104	4.55e-06	Distal Intergenic	129350	130495	1146	-	CIL0978S0018
scaffold74126	220805	220815	11	strongHyper	0.289	4.83e-08	Exon (CIL0978S0026.mRNA/CIL0978S0026, exon 6 of 12)	217995	223207	5213	-	CIL0978S0026
scaffold74126	532649	532909	261	strongHypo	-0.291	2.55e-12	Distal Intergenic	546980	551706	4727	-	CIL0978S0058
scaffold74126	547109	547278	170	strongHyper	0.118	0.00106	Exon (CIL0978S0058.mRNA/CIL0978S0058, exon 3 of 3)	546980	551706	4727	-	CIL0978S0058
scaffold74126	621543	621897	355	strongHypo	-0.113	1.29e-05	Promoter (2-3kb)	623854	635590	11737	+	CIL0978S0066
scaffold74126	768298	768521	224	strongHypo	-0.162	1.25e-06	Intron (CIL0978S0086.mRNA/CIL0978S0086, intron 4 of 4)	766119	769101	2983	+	CIL0978S0086
scaffold74126	815663	815915	253	strongHypo	-0.178	1.65e-05	Distal Intergenic	825591	835240	9650	+	CIL0978S0088
scaffold74126	887172	887314	143	strongHyper	0.197	1.2e-07	Distal Intergenic	879253	880787	1535	-	CIL0978S0092
scaffold74126	943817	944074	258	strongHypo	-0.112	0.000548	Distal Intergenic	937163	943552	6390	+	CIL0978S0098
scaffold74126	946258	946328	71	strongHypo	-0.209	3.69e-06	Distal Intergenic	937163	943552	6390	+	CIL0978S0098
scaffold74126	1038420	1038641	222	strongHyper	0.13	3.83e-05	Intron (CIL0978S0105.mRNA/CIL0978S0105, intron 2 of 5)	1031643	1042371	10729	-	CIL0978S0105
scaffold74126	1130157	1130205	49	strongHyper	0.522	6.78e-11	Distal Intergenic	1102263	1103038	776	-	CIL0978S0111
scaffold74126	1134319	1134495	177	strongHypo	-0.265	8.31e-06	Distal Intergenic	1102263	1103038	776	-	CIL0978S0111
scaffold74126	1464431	1464923	493	strongHyper	0.151	4.98e-08	Intron (CIL0978S0138.mRNA/CIL0978S0138, intron 11 of 55)	1444340	1450236	5897	+	CIL0978S0137
scaffold74126	1510519	1510704	186	strongHyper	0.199	1.32e-07	Intron (CIL0978S0138.mRNA/CIL0978S0138, intron 55 of 55)	1451671	1511899	60229	-	CIL0978S0138
scaffold74126	1514967	1515086	120	strongHyper	0.321	2.26e-14	Distal Intergenic	1451671	1511899	60229	-	CIL0978S0138
scaffold74126	1528543	1528813	271	strongHyper	0.116	4.53e-06	Distal Intergenic	1516828	1519373	2546	-	CIL0978S0139
scaffold74126	1579877	1579979	103	strongHyper	0.247	1.12e-07	Distal Intergenic	1573594	1575567	1974	-	CIL0978S0143
scaffold74126	1716943	1717165	223	strongHyper	0.117	0.00132	Distal Intergenic	1713004	1714062	1059	+	CIL0978S0155
scaffold74126	1810225	1810373	149	strongHypo	-0.269	1.2e-05	Distal Intergenic	1819739	1821409	1671	+	CIL0978S0167
scaffold74126	1924654	1924662	9	strongHyper	0.411	2.7e-06	Exon (CIL0978S0172.mRNA/CIL0978S0172, exon 1 of 2)	1923737	1924675	939	-	CIL0978S0172
scaffold74126	2042561	2042922	362	strongHyper	0.344	3.88e-37	Intron (CIL0978S0177.mRNA/CIL0978S0177, intron 2 of 7)	2040611	2049140	8530	-	CIL0978S0177
scaffold74126	2158633	2158753	121	strongHyper	0.115	4.94e-06	Distal Intergenic	2154036	2154521	486	-	CIL0978S0180
scaffold74126	2224277	2224323	47	strongHypo	-0.169	0.00122	Promoter (2-3kb)	2213132	2222278	9147	-	CIL0978S0183
scaffold74126	2284717	2284746	30	strongHyper	0.295	9.72e-13	Distal Intergenic	2213132	2222278	9147	-	CIL0978S0183
scaffold74126	2380642	2380653	12	strongHyper	0.404	4.7e-12	Exon (CIL0978S0185.mRNA/CIL0978S0185, exon 16 of 20)	2361739	2384697	22959	+	CIL0978S0185
scaffold74237	43818	43869	52	strongHypo	-0.13	0.00531	Distal Intergenic	50177	57497	7321	-	CIL0979S0002
scaffold74237	55340	55350	11	strongHypo	-0.301	5.34e-07	Intron (CIL0979S0002.mRNA/CIL0979S0002, intron 10 of 13)	50177	57497	7321	-	CIL0979S0002
scaffold74237	136865	137279	415	strongHypo	-0.113	2.87e-06	Promoter (2-3kb)	133219	134302	1084	-	CIL0979S0006
scaffold74237	200121	200144	24	strongHypo	-0.253	1.6e-09	Intron (CIL0979S0010.mRNA/CIL0979S0010, intron 4 of 4)	196899	201350	4452	+	CIL0979S0010
scaffold74237	233203	233340	138	strongHyper	0.105	0.0122	Distal Intergenic	249004	250789	1786	+	CIL0979S0013
scaffold74237	307271	307460	190	strongHypo	-0.18	5.72e-06	Distal Intergenic	298379	304164	5786	+	CIL0979S0017
scaffold74237	338676	339027	352	strongHypo	-0.154	1.41e-05	Intron (CIL0979S0019.mRNA/CIL0979S0019, intron 9 of 29)	318045	381390	63346	+	CIL0979S0019
scaffold74237	339385	339737	353	strongHypo	-0.103	3.16e-05	Intron (CIL0979S0019.mRNA/CIL0979S0019, intron 9 of 29)	318045	381390	63346	+	CIL0979S0019
scaffold74237	354646	354728	83	strongHyper	0.141	0.00168	Intron (CIL0979S0019.mRNA/CIL0979S0019, intron 17 of 29)	381698	387093	5396	-	CIL0979S0020
scaffold74237	361583	362145	563	strongHypo	-0.114	2.34e-11	Intron (CIL0979S0019.mRNA/CIL0979S0019, intron 18 of 29)	381698	387093	5396	-	CIL0979S0020
scaffold74237	367809	368705	897	strongHypo	-0.156	1.06e-21	Intron (CIL0979S0019.mRNA/CIL0979S0019, intron 20 of 29)	381698	387093	5396	-	CIL0979S0020
scaffold74237	435750	435916	167	strongHypo	-0.15	0.00177	Intron (CIL0979S0021.mRNA/CIL0979S0021, intron 8 of 18)	408278	461247	52970	+	CIL0979S0021
scaffold74237	449448	449596	149	strongHypo	-0.109	0.0011	Intron (CIL0979S0021.mRNA/CIL0979S0021, intron 11 of 18)	408278	461247	52970	+	CIL0979S0021
scaffold74237	510670	510713	44	strongHyper	0.315	2.77e-06	Intron (CIL0979S0023.mRNA/CIL0979S0023, intron 2 of 5)	507017	513953	6937	+	CIL0979S0023
scaffold74237	580463	580508	46	strongHyper	0.215	0.000203	Intron (CIL0979S0026.mRNA/CIL0979S0026, intron 11 of 21)	567177	593177	26001	-	CIL0979S0026
scaffold74237	639216	639478	263	strongHypo	-0.119	0.00223	Distal Intergenic	630714	634701	3988	-	CIL0979S0031
scaffold74237	698771	698935	165	strongHypo	-0.17	0.00036	Distal Intergenic	694949	695459	511	-	CIL0979S0035
scaffold74237	875622	875658	37	strongHypo	-0.23	0.00029	Distal Intergenic	914600	915412	813	-	CIL0979S0052
scaffold74237	987740	987776	37	strongHypo	-0.157	8.09e-05	Promoter (<=1kb)	981976	986816	4841	-	CIL0979S0060
scaffold74237	1143632	1143938	307	strongHyper	0.134	4.89e-06	Intron (CIL0979S0084.mRNA/CIL0979S0084, intron 5 of 5)	1132465	1152390	19926	+	CIL0979S0084
scaffold74237	1255789	1256029	241	strongHyper	0.209	3.55e-05	Distal Intergenic	1225618	1231606	5989	-	CIL0979S0094
scaffold74237	1257093	1257158	66	strongHyper	0.112	0.000346	Distal Intergenic	1225618	1231606	5989	-	CIL0979S0094
scaffold74237	1433876	1433975	100	strongHypo	-0.134	1.59e-05	Distal Intergenic	1452158	1459657	7500	+	CIL0979S0103
scaffold74237	1471320	1471624	305	strongHyper	0.107	2.22e-06	Intron (CIL0979S0105.mRNA/CIL0979S0105, intron 1 of 2)	1470356	1474160	3805	-	CIL0979S0105
scaffold74237	1532840	1533306	467	strongHyper	0.12	2.99e-08	Intron (CIL0979S0111.mRNA/CIL0979S0111, intron 3 of 6)	1530318	1538567	8250	+	CIL0979S0111
scaffold74237	1570914	1570932	19	strongHypo	-0.273	2.54e-05	Promoter (2-3kb)	1566881	1568748	1868	-	CIL0979S0116
scaffold74237	1649174	1649306	133	strongHyper	0.202	7.32e-05	Promoter (1-2kb)	1651159	1656540	5382	+	CIL0979S0121
scaffold74237	1811477	1811546	70	strongHypo	-0.202	4.4e-06	Exon (CIL0979S0134.mRNA/CIL0979S0134, exon 24 of 30)	1804173	1804982	810	-	CIL0979S0133
scaffold74237	1831779	1832639	861	strongHyper	0.133	2.18e-19	Distal Intergenic	1809671	1827764	18094	-	CIL0979S0134
scaffold74237	1837890	1838075	186	strongHypo	-0.15	1.65e-05	Distal Intergenic	1809671	1827764	18094	-	CIL0979S0134
scaffold74237	1896903	1896933	31	strongHypo	-0.273	4.23e-11	Distal Intergenic	1875077	1877095	2019	-	CIL0979S0135
scaffold74237	1938836	1938847	12	strongHyper	0.145	1.89e-05	Exon (CIL0979S0140.mRNA/CIL0979S0140, exon 1 of 1)	1938489	1939059	571	-	CIL0979S0140
scaffold74237	1966061	1966128	68	strongHypo	-0.251	4.26e-10	Distal Intergenic	1958817	1964640	5824	+	CIL0979S0143
scaffold74237	1971178	1971394	217	strongHyper	0.156	0.00136	Distal Intergenic	1958817	1964640	5824	+	CIL0979S0143
scaffold74237	2011185	2011293	109	strongHyper	0.286	3.81e-09	Intron (CIL0979S0146.mRNA/CIL0979S0146, intron 11 of 16)	1995534	2018387	22854	+	CIL0979S0146
scaffold74237	2136288	2136472	185	strongHyper	0.153	7.35e-07	Distal Intergenic	2146738	2148432	1695	+	CIL0979S0158
scaffold74237	2194537	2194768	232	strongHypo	-0.154	3.51e-08	Distal Intergenic	2201752	2205725	3974	+	CIL0979S0165
scaffold74237	2222656	2222758	103	strongHyper	0.21	0.000824	Intron (CIL0979S0167.mRNA/CIL0979S0167, intron 3 of 9)	2213224	2217173	3950	-	CIL0979S0166
scaffold74237	2226143	2226253	111	strongHyper	0.127	0.000131	Intron (CIL0979S0167.mRNA/CIL0979S0167, intron 3 of 9)	2213224	2217173	3950	-	CIL0979S0166
scaffold74237	2235171	2235381	211	strongHyper	0.326	4.52e-16	Intron (CIL0979S0167.mRNA/CIL0979S0167, intron 8 of 9)	2218254	2245439	27186	-	CIL0979S0167
scaffold74237	2239147	2239222	76	strongHypo	-0.189	1.41e-05	Intron (CIL0979S0167.mRNA/CIL0979S0167, intron 8 of 9)	2218254	2245439	27186	-	CIL0979S0167
scaffold74237	2287306	2287314	9	strongHyper	0.275	1.22e-11	Exon (CIL0979S0169.mRNA/CIL0979S0169, exon 2 of 16)	2286079	2299283	13205	+	CIL0979S0169
scaffold74237	2287576	2287785	210	strongHypo	-0.184	6.1e-06	Intron (CIL0979S0169.mRNA/CIL0979S0169, intron 2 of 15)	2286079	2299283	13205	+	CIL0979S0169
scaffold74237	2371603	2371621	19	strongHypo	-0.301	3.59e-08	Promoter (1-2kb)	2373359	2376352	2994	+	CIL0979S0174
scaffold74237	2398782	2398849	68	strongHypo	-0.155	8.37e-09	Promoter (1-2kb)	2396786	2397173	388	-	CIL0979S0176
scaffold74237	2485930	2486079	150	strongHypo	-0.256	1.37e-08	Promoter (1-2kb)	2487720	2491114	3395	+	CIL0979S0179
scaffold74237	2533939	2534138	200	strongHypo	-0.192	3.21e-05	Distal Intergenic	2531658	2533400	1743	+	CIL0979S0182
scaffold74348	122138	122491	354	strongHyper	0.112	0.00012	Intron (CIL0982S0009.mRNA/CIL0982S0009, intron 9 of 13)	115570	131446	15877	+	CIL0982S0009
scaffold74348	123978	124029	52	strongHyper	0.291	1.86e-07	Intron (CIL0982S0009.mRNA/CIL0982S0009, intron 9 of 13)	115570	131446	15877	+	CIL0982S0009
scaffold74348	355414	355654	241	strongHypo	-0.206	5.92e-07	Distal Intergenic	347432	350787	3356	-	CIL0982S0029
scaffold74348	366904	367023	120	strongHypo	-0.192	5.5e-05	Distal Intergenic	371374	377364	5991	+	CIL0982S0030
scaffold74348	482181	482351	171	strongHypo	-0.174	0.000348	Promoter (<=1kb)	482910	492073	9164	+	CIL0982S0041
scaffold74348	528579	528822	244	strongHypo	-0.143	0.000695	Intron (CIL0982S0043.mRNA/CIL0982S0043, intron 1 of 6)	514017	519659	5643	-	CIL0982S0042
scaffold74348	662366	662452	87	strongHyper	0.182	5.69e-06	Distal Intergenic	654011	655914	1904	+	CIL0982S0050
scaffold74348	691678	691757	80	strongHyper	0.164	7.59e-05	Promoter (<=1kb)	691984	695145	3162	+	CIL0982S0051
scaffold74348	692200	692219	20	strongHyper	0.269	4.08e-05	Exon (CIL0982S0051.mRNA/CIL0982S0051, exon 1 of 4)	691984	695145	3162	+	CIL0982S0051
scaffold74348	961837	962237	401	strongHypo	-0.103	7.61e-05	Intron (CIL0982S0060.mRNA/CIL0982S0060, intron 5 of 5)	958157	968802	10646	+	CIL0982S0060
scaffold74348	988956	989189	234	strongHyper	0.268	4.72e-13	Intron (CIL0982S0062.mRNA/CIL0982S0062, intron 5 of 6)	970110	973074	2965	+	CIL0982S0061
scaffold74348	1028381	1028578	198	strongHyper	0.157	1.35e-06	Intron (CIL0982S0063.mRNA/CIL0982S0063, intron 1 of 6)	1020889	1035105	14217	-	CIL0982S0063
scaffold74348	1121744	1121989	246	strongHyper	0.182	8.2e-06	Intron (CIL0982S0066.mRNA/CIL0982S0066, intron 1 of 3)	1115136	1124911	9776	-	CIL0982S0066
scaffold74348	1403469	1403661	193	strongHypo	-0.168	2.59e-05	Distal Intergenic	1396982	1398683	1702	+	CIL0982S0084
scaffold74348	1682812	1682902	91	strongHyper	0.226	4.78e-08	Intron (CIL0982S0106.mRNA/CIL0982S0106, intron 3 of 11)	1676076	1691780	15705	-	CIL0982S0106
scaffold74348	1749419	1749432	14	strongHypo	-0.221	0.000117	Distal Intergenic	1745587	1746912	1326	+	CIL0982S0111
scaffold74348	1784466	1784502	37	strongHyper	0.147	9.84e-05	Intron (CIL0982S0116.mRNA/CIL0982S0116, intron 2 of 9)	1776682	1777341	660	+	CIL0982S0114
scaffold74348	1891485	1891543	59	strongHypo	-0.215	5.6e-11	Distal Intergenic	1881973	1888927	6955	+	CIL0982S0122
scaffold74348	1893475	1893712	238	strongHypo	-0.132	0.00016	Distal Intergenic	1881973	1888927	6955	+	CIL0982S0122
scaffold74348	2047663	2047702	40	strongHypo	-0.244	1.05e-06	Intron (CIL0982S0130.mRNA/CIL0982S0130, intron 7 of 8)	1996596	2085156	88561	-	CIL0982S0130
scaffold74348	2110288	2110499	212	strongHypo	-0.183	1.48e-06	Intron (CIL0982S0131.mRNA/CIL0982S0131, intron 1 of 1)	2103545	2128393	24849	+	CIL0982S0131
scaffold74348	2158907	2158969	63	strongHypo	-0.24	1.11e-06	Promoter (1-2kb)	2149010	2157649	8640	-	CIL0982S0135
scaffold74348	2280247	2280321	75	strongHyper	0.127	0.00611	Intron (CIL0982S0155.mRNA/CIL0982S0155, intron 4 of 15)	2272560	2277256	4697	+	CIL0982S0154
scaffold74459	16109	16116	8	strongHypo	-0.206	1.02e-05	Distal Intergenic	7002	15081	8080	+	CIL0984S0001
scaffold74459	270520	270570	51	strongHypo	-0.321	4.04e-07	Distal Intergenic	310146	311300	1155	+	CIL0984S0014
scaffold74459	335990	336213	224	strongHyper	0.269	6.39e-08	Distal Intergenic	310146	311300	1155	+	CIL0984S0014
scaffold74459	356579	356607	29	strongHypo	-0.166	9.93e-06	Distal Intergenic	372703	377994	5292	+	CIL0984S0017
scaffold74459	375465	375736	272	strongHyper	0.205	1.53e-07	Intron (CIL0984S0017.mRNA/CIL0984S0017, intron 2 of 3)	372703	377994	5292	+	CIL0984S0017
scaffold74459	700366	700493	128	strongHyper	0.194	1.48e-05	Distal Intergenic	654862	655386	525	-	CIL0984S0040
scaffold74459	715252	715314	63	strongHypo	-0.243	4.58e-05	Distal Intergenic	756794	757898	1105	-	CIL0984S0041
scaffold74459	1009315	1009470	156	strongHypo	-0.131	2e-06	Intron (CIL0984S0063.mRNA/CIL0984S0063, intron 4 of 8)	1007156	1013066	5911	+	CIL0984S0063
scaffold74459	1063598	1063898	301	strongHyper	0.169	3.93e-10	Intron (CIL0984S0069.mRNA/CIL0984S0069, intron 8 of 10)	1056317	1066152	9836	-	CIL0984S0069
scaffold74459	1118513	1118532	20	strongHyper	0.232	7.6e-05	Promoter (2-3kb)	1120580	1127021	6442	+	CIL0984S0074
scaffold74459	1225182	1225771	590	strongHypo	-0.118	0.000201	Promoter (1-2kb)	1226490	1228819	2330	+	CIL0984S0082
scaffold74459	1248953	1249246	294	strongHyper	0.169	1.38e-07	Intron (CIL0984S0084.mRNA/CIL0984S0084, intron 1 of 1)	1248225	1255664	7440	-	CIL0984S0084
scaffold74459	1252417	1252680	264	strongHypo	-0.104	0.0152	Intron (CIL0984S0084.mRNA/CIL0984S0084, intron 1 of 1)	1248225	1255664	7440	-	CIL0984S0084
scaffold74459	1304326	1304376	51	strongHypo	-0.374	3.5e-07	Distal Intergenic	1294900	1297944	3045	-	CIL0984S0089
scaffold74459	1656812	1657130	319	strongHyper	0.169	2.26e-09	Intron (CIL0984S0101.mRNA/CIL0984S0101, intron 7 of 17)	1644373	1670058	25686	-	CIL0984S0101
scaffold74459	1660267	1660667	401	strongHyper	0.125	1.89e-07	Intron (CIL0984S0101.mRNA/CIL0984S0101, intron 9 of 17)	1644373	1670058	25686	-	CIL0984S0101
scaffold74459	1673109	1673275	167	strongHypo	-0.21	1.12e-07	Distal Intergenic	1644373	1670058	25686	-	CIL0984S0101
scaffold74459	1674090	1674516	427	strongHyper	0.133	1.77e-05	Distal Intergenic	1644373	1670058	25686	-	CIL0984S0101
scaffold74459	1822769	1823177	409	strongHypo	-0.228	1.69e-14	Distal Intergenic	1825037	1829653	4617	-	CIL0984S0105
scaffold74459	1824131	1824401	271	strongHypo	-0.199	1.28e-11	Distal Intergenic	1825037	1829653	4617	-	CIL0984S0105
scaffold74459	1977551	1977711	161	strongHyper	0.253	1.95e-06	Distal Intergenic	1980305	1981573	1269	-	CIL0984S0118
scaffold74459	2054491	2054583	93	strongHypo	-0.297	7.84e-05	Distal Intergenic	2065740	2066183	444	-	CIL0984S0124
scaffold74459	2114824	2114885	62	strongHyper	0.285	0.000116	Distal Intergenic	2100971	2111438	10468	-	CIL0984S0126
scaffold74459	2186241	2186306	66	strongHyper	0.111	0.015	Distal Intergenic	2159759	2170512	10754	-	CIL0984S0128
scaffold74459	2214534	2214645	112	strongHypo	-0.222	6.75e-10	Distal Intergenic	2159759	2170512	10754	-	CIL0984S0128
scaffold74570	35022	35063	42	strongHyper	0.286	1.08e-06	Distal Intergenic	28262	31958	3697	+	CIL0987S0005
scaffold74570	35763	35855	93	strongHypo	-0.122	0.000274	Distal Intergenic	42356	47296	4941	+	CIL0987S0006
scaffold74570	280164	280239	76	strongHypo	-0.175	1.77e-06	Intron (CIL0987S0031.mRNA/CIL0987S0031, intron 6 of 6)	275829	286835	11007	-	CIL0987S0031
scaffold74570	477822	478347	526	strongHyper	0.183	3.68e-12	Promoter (2-3kb)	472455	476055	3601	-	CIL0987S0055
scaffold74570	564187	564206	20	strongHypo	-0.28	0.000168	3' UTR	562507	573217	10711	-	CIL0987S0064
scaffold74570	742159	742184	26	strongHypo	-0.377	6.63e-12	Intron (CIL0987S0088.mRNA/CIL0987S0088, intron 4 of 6)	738595	745785	7191	+	CIL0987S0088
scaffold74570	760004	760087	84	strongHypo	-0.445	1.57e-17	Promoter (1-2kb)	755032	758495	3464	-	CIL0987S0090
scaffold74570	819572	819682	111	strongHypo	-0.262	6.01e-05	Intron (CIL0987S0095.mRNA/CIL0987S0095, intron 9 of 10)	814270	826458	12189	+	CIL0987S0095
scaffold74570	824892	825610	719	strongHypo	-0.107	1.91e-15	Intron (CIL0987S0095.mRNA/CIL0987S0095, intron 9 of 10)	831942	837999	6058	+	CIL0987S0096
scaffold74570	830861	830903	43	strongHyper	0.22	0.000204	Promoter (1-2kb)	831942	837999	6058	+	CIL0987S0096
scaffold74570	1046294	1046437	144	strongHypo	-0.216	0.000452	Promoter (2-3kb)	1048665	1051815	3151	+	CIL0987S0116
scaffold74570	1122562	1122589	28	strongHyper	0.179	0.000137	Exon (CIL0987S0126.mRNA/CIL0987S0126, exon 10 of 16)	1119138	1126929	7792	+	CIL0987S0126
scaffold74570	1129471	1129562	92	strongHyper	0.172	0.000546	Distal Intergenic	1133753	1139492	5740	+	CIL0987S0127
scaffold74570	1141679	1142202	524	strongHyper	0.127	1.02e-08	Intron (CIL0987S0128.mRNA/CIL0987S0128, intron 3 of 9)	1133753	1139492	5740	+	CIL0987S0127
scaffold74570	1157811	1158028	218	strongHypo	-0.112	0.0228	Intron (CIL0987S0129.mRNA/CIL0987S0129, intron 13 of 14)	1152061	1161046	8986	+	CIL0987S0129
scaffold74570	1258472	1258578	107	strongHyper	0.124	9.59e-06	Distal Intergenic	1241394	1245019	3626	-	CIL0987S0144
scaffold74570	1385839	1385980	142	strongHypo	-0.22	4.03e-08	Promoter (2-3kb)	1378324	1383562	5239	-	CIL0987S0154
scaffold74570	1528342	1528376	35	strongHypo	-0.308	4.11e-05	Distal Intergenic	1495494	1517554	22061	+	CIL0987S0166
scaffold74570	1566321	1566745	425	strongHypo	-0.225	4.62e-09	Distal Intergenic	1595927	1597064	1138	-	CIL0987S0167
scaffold74570	1878573	1878674	102	strongHyper	0.149	0.00618	Exon (CIL0987S0179.mRNA/CIL0987S0179, exon 2 of 2)	1878618	1881574	2957	-	CIL0987S0179
scaffold74570	2035799	2035965	167	strongHypo	-0.101	0.000271	Intron (CIL0987S0189.mRNA/CIL0987S0189, intron 1 of 1)	2033395	2038928	5534	-	CIL0987S0189
scaffold74570	2037681	2037818	138	strongHypo	-0.104	9.76e-12	Intron (CIL0987S0189.mRNA/CIL0987S0189, intron 1 of 1)	2033395	2038928	5534	-	CIL0987S0189
scaffold74570	2043981	2043999	19	strongHyper	0.24	0.000329	Distal Intergenic	2033395	2038928	5534	-	CIL0987S0189
scaffold74681	108087	108380	294	strongHypo	-0.195	0.000834	Intron (CIL0989S0001.mRNA/CIL0989S0001, intron 2 of 3)	103276	126029	22754	+	CIL0989S0001
scaffold74681	113368	113441	74	strongHypo	-0.184	9.66e-05	Intron (CIL0989S0001.mRNA/CIL0989S0001, intron 2 of 3)	103276	126029	22754	+	CIL0989S0001
scaffold74681	115257	115289	33	strongHypo	-0.231	4.68e-05	Intron (CIL0989S0001.mRNA/CIL0989S0001, intron 2 of 3)	103276	126029	22754	+	CIL0989S0001
scaffold74681	120582	120691	110	strongHyper	0.181	6.53e-10	Intron (CIL0989S0001.mRNA/CIL0989S0001, intron 2 of 3)	132307	133695	1389	-	CIL0989S0002
scaffold74681	170995	171007	13	strongHypo	-0.292	0.000192	Distal Intergenic	162127	170448	8322	+	CIL0989S0003
scaffold74681	203953	204164	212	strongHypo	-0.167	1.04e-10	Distal Intergenic	229333	230390	1058	+	CIL0989S0006
scaffold74681	265273	265324	52	strongHyper	0.238	1.03e-07	Distal Intergenic	229333	230390	1058	+	CIL0989S0006
scaffold74681	286813	286891	79	strongHypo	-0.263	3.24e-09	Distal Intergenic	326373	330470	4098	-	CIL0989S0010
scaffold74681	296020	296254	235	strongHyper	0.154	2.76e-10	Distal Intergenic	326373	330470	4098	-	CIL0989S0010
scaffold74681	351909	351923	15	strongHypo	-0.196	8.2e-05	Distal Intergenic	333497	337760	4264	-	CIL0989S0011
scaffold74681	388999	389227	229	strongHypo	-0.22	1.31e-09	Promoter (1-2kb)	371928	387639	15712	-	CIL0989S0012
scaffold74681	551501	551530	30	strongHypo	-0.166	5.94e-06	Intron (CIL0989S0019.mRNA/CIL0989S0019, intron 2 of 6)	546271	555641	9371	+	CIL0989S0019
scaffold74681	569666	569726	61	strongHypo	-0.212	6.32e-07	Promoter (1-2kb)	570744	573114	2371	+	CIL0989S0022
scaffold74681	749972	750111	140	strongHypo	-0.106	0.00298	Distal Intergenic	782988	784133	1146	-	CIL0989S0040
scaffold74681	815689	815721	33	strongHypo	-0.323	2.13e-06	Distal Intergenic	806989	810578	3590	+	CIL0989S0042
scaffold74681	823032	823214	183	strongHypo	-0.192	7.25e-07	Distal Intergenic	828614	835177	6564	+	CIL0989S0043
scaffold74681	824796	824876	81	strongHyper	0.206	0.00111	Distal Intergenic	828614	835177	6564	+	CIL0989S0043
scaffold74681	890868	890919	52	strongHyper	0.13	3.72e-11	Distal Intergenic	846776	856248	9473	-	CIL0989S0045
scaffold74681	915918	916139	222	strongHypo	-0.367	2.23e-33	Distal Intergenic	846776	856248	9473	-	CIL0989S0045
scaffold74681	1008793	1008804	12	strongHypo	-0.111	0.000145	Distal Intergenic	998344	1000040	1697	-	CIL0989S0050
scaffold74681	1145031	1145270	240	strongHypo	-0.12	0.0153	Distal Intergenic	1268455	1269391	937	-	CIL0989S0054
scaffold74681	1333892	1333915	24	strongHyper	0.179	0.000642	Exon (CIL0989S0060.mRNA/CIL0989S0060, exon 2 of 5)	1333567	1336132	2566	+	CIL0989S0060
scaffold74681	1473250	1473390	141	strongHyper	0.12	0.0014	Intron (CIL0989S0070.mRNA/CIL0989S0070, intron 1 of 1)	1465310	1476202	10893	+	CIL0989S0070
scaffold74681	1587197	1587238	42	strongHypo	-0.136	0.000306	Intron (CIL0989S0079.mRNA/CIL0989S0079, intron 1 of 4)	1586583	1595728	9146	+	CIL0989S0079
scaffold74681	1661805	1662042	238	strongHyper	0.103	0.0278	Intron (CIL0989S0086.mRNA/CIL0989S0086, intron 2 of 5)	1644457	1655813	11357	+	CIL0989S0085
scaffold74681	1665527	1665544	18	strongHypo	-0.229	1.26e-05	Intron (CIL0989S0086.mRNA/CIL0989S0086, intron 2 of 5)	1658816	1680868	22053	-	CIL0989S0086
scaffold74681	1678113	1678138	26	strongHypo	-0.214	1.62e-05	Intron (CIL0989S0086.mRNA/CIL0989S0086, intron 4 of 5)	1658816	1680868	22053	-	CIL0989S0086
scaffold74681	1740341	1740504	164	strongHypo	-0.115	0.0313	Distal Intergenic	1737865	1739633	1769	+	CIL0989S0088
scaffold74681	1882544	1882777	234	strongHypo	-0.267	3.48e-11	Distal Intergenic	1870093	1871934	1842	+	CIL0989S0093
scaffold74681	1927122	1927249	128	strongHypo	-0.478	1.11e-51	Distal Intergenic	1870093	1871934	1842	+	CIL0989S0093
scaffold74793	168738	169162	425	strongHypo	-0.106	1.36e-08	Intron (CIL0990S0008.mRNA/CIL0990S0008, intron 5 of 12)	164982	185784	20803	+	CIL0990S0008
scaffold74793	192085	192401	317	strongHypo	-0.183	3.01e-07	Distal Intergenic	164982	185784	20803	+	CIL0990S0008
scaffold74793	286651	286693	43	strongHyper	0.182	2.22e-10	Distal Intergenic	306067	306300	234	-	CIL0990S0015
scaffold74793	311882	312139	258	strongHypo	-0.248	2.05e-07	Distal Intergenic	312471	314564	2094	-	CIL0990S0016
scaffold74793	402477	402507	31	strongHypo	-0.18	0.000981	Distal Intergenic	401505	402011	507	+	CIL0990S0021
scaffold74793	403826	403851	26	strongHyper	0.523	2.22e-21	Distal Intergenic	401505	402011	507	+	CIL0990S0021
scaffold74793	420945	421078	134	strongHypo	-0.174	0.00518	Distal Intergenic	416767	419192	2426	+	CIL0990S0022
scaffold74793	484869	484914	46	strongHypo	-0.241	0.0105	Distal Intergenic	493552	495088	1537	+	CIL0990S0028
scaffold74793	487271	487318	48	strongHypo	-0.147	0.00117	Distal Intergenic	493552	495088	1537	+	CIL0990S0028
scaffold74793	535037	535253	217	strongHypo	-0.182	0.000852	Distal Intergenic	505813	506742	930	+	CIL0990S0030
scaffold74793	637463	637685	223	strongHyper	0.122	0.00731	Intron (CIL0990S0032.mRNA/CIL0990S0032, intron 2 of 13)	630770	678944	48175	+	CIL0990S0032
scaffold74793	639645	639708	64	strongHyper	0.362	1.01e-24	Intron (CIL0990S0032.mRNA/CIL0990S0032, intron 2 of 13)	630770	678944	48175	+	CIL0990S0032
scaffold74793	693764	694063	300	strongHypo	-0.143	0.00348	Intron (CIL0990S0033.mRNA/CIL0990S0033, intron 2 of 12)	691766	715936	24171	+	CIL0990S0033
scaffold74793	769820	769941	122	strongHypo	-0.179	3.24e-05	Distal Intergenic	777997	780371	2375	+	CIL0990S0038
scaffold74793	846124	846390	267	strongHypo	-0.321	3.09e-09	Distal Intergenic	837910	843075	5166	-	CIL0990S0045
scaffold74793	994519	995230	712	strongHyper	0.136	3.99e-26	Distal Intergenic	1008745	1010471	1727	+	CIL0990S0066
scaffold74793	995540	995828	289	strongHyper	0.108	1.4e-05	Distal Intergenic	1008745	1010471	1727	+	CIL0990S0066
scaffold74793	1006315	1006407	93	strongHypo	-0.211	5.11e-06	Promoter (2-3kb)	1008745	1010471	1727	+	CIL0990S0066
scaffold74793	1076287	1076456	170	strongHypo	-0.159	6.36e-05	Promoter (2-3kb)	1078943	1079869	927	+	CIL0990S0071
scaffold74793	1091612	1091739	128	strongHyper	0.156	0.000233	Distal Intergenic	1096688	1097895	1208	+	CIL0990S0073
scaffold74793	1445420	1445487	68	strongHyper	0.231	1.05e-15	Intron (CIL0990S0088.mRNA/CIL0990S0088, intron 5 of 5)	1437503	1447901	10399	-	CIL0990S0088
scaffold74793	1449942	1449962	21	strongHypo	-0.22	4.09e-08	Promoter (<=1kb)	1450385	1461433	11049	+	CIL0990S0089
scaffold74793	1509080	1509204	125	strongHypo	-0.108	7.12e-05	Promoter (1-2kb)	1510157	1513017	2861	+	CIL0990S0093
scaffold74793	1958275	1958401	127	strongHypo	-0.137	1.45e-05	Promoter (1-2kb)	1954529	1956497	1969	-	CIL0990S0156
scaffold74793	2146513	2146582	70	strongHyper	0.142	1.81e-05	Intron (CIL0990S0173.mRNA/CIL0990S0173, intron 7 of 10)	2142325	2149398	7074	+	CIL0990S0173
scaffold74793	2256481	2256542	62	strongHyper	0.144	0.00131	Exon (CIL0990S0183.mRNA/CIL0990S0183, exon 1 of 1)	2256469	2256771	303	+	CIL0990S0183
scaffold74904	9940	10423	484	strongHypo	-0.124	1.06e-05	Distal Intergenic	28650	48646	19997	+	CIL0992S0002
scaffold74904	27399	27510	112	strongHypo	-0.199	2.46e-05	Promoter (1-2kb)	28650	48646	19997	+	CIL0992S0002
scaffold74904	208157	208424	268	strongHypo	-0.231	1.9e-07	Distal Intergenic	167540	168646	1107	-	CIL0992S0015
scaffold74904	466039	466584	546	strongHypo	-0.282	2.74e-33	Distal Intergenic	469061	473721	4661	+	CIL0992S0037
scaffold74904	479421	479712	292	strongHyper	0.137	0.00109	Distal Intergenic	487296	488846	1551	+	CIL0992S0038
scaffold74904	685889	685906	18	strongHyper	0.199	7.41e-13	3' UTR	684333	699965	15633	-	CIL0992S0050
scaffold74904	964643	964705	63	strongHypo	-0.137	3.21e-08	Intron (CIL0992S0069.mRNA/CIL0992S0069, intron 6 of 7)	968851	974336	5486	-	CIL0992S0070
scaffold74904	1047103	1047516	414	strongHypo	-0.21	1.05e-06	Promoter (1-2kb)	1048798	1060604	11807	+	CIL0992S0073
scaffold74904	1124258	1124329	72	strongHypo	-0.242	2.24e-08	Intron (CIL0992S0078.mRNA/CIL0992S0078, intron 6 of 11)	1111004	1138129	27126	+	CIL0992S0078
scaffold74904	1156715	1156761	47	strongHypo	-0.237	7.13e-09	Promoter (<=1kb)	1157576	1163827	6252	+	CIL0992S0081
scaffold74904	1185830	1186049	220	strongHypo	-0.159	8.3e-05	Distal Intergenic	1173387	1176403	3017	-	CIL0992S0082
scaffold74904	1254104	1254114	11	strongHyper	0.341	4.68e-06	Promoter (1-2kb)	1255614	1263829	8216	+	CIL0992S0088
scaffold74904	1440952	1440971	20	strongHyper	0.199	1.4e-05	Distal Intergenic	1433192	1435902	2711	-	CIL0992S0100
scaffold74904	1621130	1621374	245	strongHyper	0.167	8.01e-06	Intron (CIL0992S0108.mRNA/CIL0992S0108, intron 11 of 12)	1615854	1624948	9095	+	CIL0992S0108
scaffold74904	1763692	1763895	204	strongHypo	-0.221	2.13e-06	Distal Intergenic	1751158	1753313	2156	-	CIL0992S0123
scaffold74904	1767050	1767142	93	strongHypo	-0.133	0.0152	Distal Intergenic	1751158	1753313	2156	-	CIL0992S0123
scaffold75015	242905	242945	41	strongHyper	0.118	1.56e-07	Intron (CIL0993S0013.mRNA/CIL0993S0013, intron 1 of 4)	241573	248628	7056	-	CIL0993S0013
scaffold75015	283151	283212	62	strongHypo	-0.191	1.57e-05	Intron (CIL0993S0015.mRNA/CIL0993S0015, intron 2 of 11)	270517	296865	26349	+	CIL0993S0015
scaffold75015	292152	292343	192	strongHyper	0.184	0.00328	Intron (CIL0993S0015.mRNA/CIL0993S0015, intron 9 of 11)	270517	296865	26349	+	CIL0993S0015
scaffold75015	377336	377488	153	strongHypo	-0.151	2.5e-05	Distal Intergenic	379025	381704	2680	-	CIL0993S0020
scaffold75015	485733	486067	335	strongHyper	0.114	7.64e-05	Intron (CIL0993S0025.mRNA/CIL0993S0025, intron 3 of 10)	479471	543859	64389	+	CIL0993S0025
scaffold75015	504322	504484	163	strongHyper	0.144	9.3e-10	Intron (CIL0993S0025.mRNA/CIL0993S0025, intron 3 of 10)	478799	526206	47408	-	CIL0993S0024
scaffold75015	621471	621810	340	strongHypo	-0.168	8.01e-08	Intron (CIL0993S0028.mRNA/CIL0993S0028, intron 5 of 8)	615531	641492	25962	+	CIL0993S0028
scaffold75015	755237	755283	47	strongHyper	0.301	7.47e-10	Distal Intergenic	765612	801546	35935	+	CIL0993S0033
scaffold75015	793154	793229	76	strongHypo	-0.161	1.63e-07	Exon (CIL0993S0033.mRNA/CIL0993S0033, exon 3 of 4)	801070	807224	6155	-	CIL0993S0034
scaffold75015	809427	809525	99	strongHypo	-0.197	6.82e-08	Promoter (2-3kb)	801070	807224	6155	-	CIL0993S0034
scaffold75015	899594	900253	660	strongHyper	0.122	3.69e-09	Distal Intergenic	900718	905924	5207	-	CIL0993S0042
scaffold75015	903152	903285	134	strongHyper	0.129	4.32e-06	Intron (CIL0993S0042.mRNA/CIL0993S0042, intron 1 of 1)	900718	905924	5207	-	CIL0993S0042
scaffold75015	911690	911921	232	strongHypo	-0.178	9.66e-09	Intron (CIL0993S0043.mRNA/CIL0993S0043, intron 6 of 11)	900718	905924	5207	-	CIL0993S0042
scaffold75015	925157	925241	85	strongHyper	0.158	6.94e-10	Intron (CIL0993S0043.mRNA/CIL0993S0043, intron 10 of 11)	905941	935973	30033	-	CIL0993S0043
scaffold75015	928126	928149	24	strongHypo	-0.26	0.000122	Intron (CIL0993S0043.mRNA/CIL0993S0043, intron 10 of 11)	905941	935973	30033	-	CIL0993S0043
scaffold75015	933536	933611	76	strongHyper	0.108	0.000202	Intron (CIL0993S0043.mRNA/CIL0993S0043, intron 10 of 11)	905941	935973	30033	-	CIL0993S0043
scaffold75015	1009461	1009793	333	strongHyper	0.107	1.66e-06	Intron (CIL0993S0048.mRNA/CIL0993S0048, intron 1 of 2)	1025007	1028029	3023	+	CIL0993S0049
scaffold75015	1029755	1029763	9	strongHypo	-0.251	5.47e-09	Distal Intergenic	1028131	1028310	180	+	CIL0993S0050
scaffold75015	1043353	1043658	306	strongHyper	0.113	1.36e-05	Intron (CIL0993S0051.mRNA/CIL0993S0051, intron 2 of 9)	1032420	1050717	18298	-	CIL0993S0051
scaffold75015	1053331	1053385	55	strongHypo	-0.327	2.02e-14	Promoter (2-3kb)	1032420	1050717	18298	-	CIL0993S0051
scaffold75015	1061477	1061632	156	strongHyper	0.12	0.0413	Intron (CIL0993S0052.mRNA/CIL0993S0052, intron 4 of 18)	1057509	1108572	51064	+	CIL0993S0052
scaffold75015	1088841	1089079	239	strongHyper	0.115	0.00409	Intron (CIL0993S0052.mRNA/CIL0993S0052, intron 10 of 18)	1112708	1115657	2950	-	CIL0993S0053
scaffold75015	1092748	1093031	284	strongHyper	0.111	5.01e-06	Intron (CIL0993S0052.mRNA/CIL0993S0052, intron 10 of 18)	1112708	1115657	2950	-	CIL0993S0053
scaffold75015	1101142	1101397	256	strongHyper	0.158	3.28e-12	Intron (CIL0993S0052.mRNA/CIL0993S0052, intron 17 of 18)	1112708	1115657	2950	-	CIL0993S0053
scaffold75015	1343676	1343742	67	strongHypo	-0.277	1.66e-07	Distal Intergenic	1347047	1349314	2268	+	CIL0993S0071
scaffold75015	1424605	1424637	33	strongHypo	-0.199	5.58e-06	Distal Intergenic	1411322	1415313	3992	-	CIL0993S0078
scaffold75015	1504283	1504324	42	strongHypo	-0.351	1.95e-12	Intron (CIL0993S0082.mRNA/CIL0993S0082, intron 7 of 8)	1490715	1506843	16129	-	CIL0993S0082
scaffold75015	1545667	1545700	34	strongHypo	-0.399	1.67e-11	Distal Intergenic	1507587	1516030	8444	-	CIL0993S0083
scaffold75015	1611419	1611497	79	strongHypo	-0.323	4.66e-05	Distal Intergenic	1579684	1580331	648	-	CIL0993S0084
scaffold75015	1660522	1660621	100	strongHypo	-0.119	0.00077	Distal Intergenic	1691396	1691578	183	+	CIL0993S0088
scaffold75015	1669084	1669225	142	strongHypo	-0.114	0.00158	Distal Intergenic	1691396	1691578	183	+	CIL0993S0088
scaffold75015	1754519	1754597	79	strongHypo	-0.18	0.000649	Distal Intergenic	1797304	1797618	315	+	CIL0993S0092
scaffold75015	1806246	1806698	453	strongHypo	-0.139	5.95e-07	Distal Intergenic	1809547	1814624	5078	+	CIL0993S0093
scaffold75015	1818883	1819074	192	strongHypo	-0.205	7.34e-08	Distal Intergenic	1809547	1814624	5078	+	CIL0993S0093
scaffold75126	522	675	154	strongHypo	-0.156	6.13e-05	Distal Intergenic	14649	15547	899	-	CIL0996S0001
scaffold75126	82349	82659	311	strongHypo	-0.195	8.8e-09	Promoter (2-3kb)	84944	86854	1911	+	CIL0996S0007
scaffold75126	131761	131806	46	strongHypo	-0.246	4.74e-07	Promoter (2-3kb)	134501	135515	1015	+	CIL0996S0009
scaffold75126	160179	160217	39	strongHyper	0.108	0.0403	Distal Intergenic	164170	165874	1705	-	CIL0996S0011
scaffold75126	185122	185271	150	strongHyper	0.3	7.34e-16	Intron (CIL0996S0012.mRNA/CIL0996S0012, intron 6 of 11)	181897	189535	7639	-	CIL0996S0012
scaffold75126	311453	311688	236	strongHyper	0.184	5.11e-08	Intron (CIL0996S0019.mRNA/CIL0996S0019, intron 9 of 22)	300077	322461	22385	+	CIL0996S0019
scaffold75126	751132	751149	18	strongHypo	-0.381	9.64e-21	Intron (CIL0996S0048.mRNA/CIL0996S0048, intron 17 of 18)	723482	756009	32528	-	CIL0996S0048
scaffold75126	756951	757026	76	strongHypo	-0.289	9.23e-08	Promoter (1-2kb)	723482	756009	32528	-	CIL0996S0048
scaffold75126	859211	859246	36	strongHyper	0.137	7.42e-05	Intron (CIL0996S0056.mRNA/CIL0996S0056, intron 2 of 4)	847896	849990	2095	-	CIL0996S0055
scaffold75126	908446	908777	332	strongHypo	-0.162	6.9e-13	Intron (CIL0996S0058.mRNA/CIL0996S0058, intron 6 of 9)	905422	910874	5453	-	CIL0996S0058
scaffold75126	1219951	1220023	73	strongHypo	-0.179	0.0213	Distal Intergenic	1220294	1223154	2861	-	CIL0996S0082
scaffold75126	1224199	1224531	333	strongHypo	-0.174	6.51e-16	Promoter (1-2kb)	1220294	1223154	2861	-	CIL0996S0082
scaffold75126	1261991	1262274	284	strongHypo	-0.124	9.39e-05	Promoter (2-3kb)	1257569	1259635	2067	-	CIL0996S0085
scaffold75126	1271466	1271484	19	strongHypo	-0.276	1.98e-10	Distal Intergenic	1276387	1277414	1028	+	CIL0996S0086
scaffold75126	1344789	1344797	9	strongHyper	0.245	2.36e-05	Distal Intergenic	1284299	1292377	8079	+	CIL0996S0087
scaffold75126	1385040	1385077	38	strongHyper	0.283	3.36e-10	Distal Intergenic	1284299	1292377	8079	+	CIL0996S0087
scaffold75126	1392751	1392836	86	strongHyper	0.111	9.62e-06	Distal Intergenic	1494069	1494977	909	+	CIL0996S0092
scaffold75126	1486509	1486678	170	strongHypo	-0.164	1.8e-06	Distal Intergenic	1494069	1494977	909	+	CIL0996S0092
scaffold75126	1488020	1488130	111	strongHypo	-0.165	0.00111	Distal Intergenic	1494069	1494977	909	+	CIL0996S0092
scaffold75126	1554157	1554235	79	strongHypo	-0.246	2.34e-12	Distal Intergenic	1565620	1569114	3495	+	CIL0996S0097
scaffold75237	144007	144227	221	strongHypo	-0.108	4.35e-06	Distal Intergenic	146734	148405	1672	-	CIL0998S0004
scaffold75237	319447	319634	188	strongHypo	-0.241	2.96e-05	Distal Intergenic	298959	306668	7710	+	CIL0998S0014
scaffold75237	349257	349276	20	strongHyper	0.203	0.000647	Intron (CIL0998S0018.mRNA/CIL0998S0018, intron 3 of 3)	344325	351315	6991	-	CIL0998S0018
scaffold75237	351028	351116	89	strongHypo	-0.126	0.007	Intron (CIL0998S0018.mRNA/CIL0998S0018, intron 3 of 3)	344325	351315	6991	-	CIL0998S0018
scaffold75237	367198	367398	201	strongHyper	0.16	4.73e-06	Distal Intergenic	351587	355337	3751	+	CIL0998S0019
scaffold75237	481821	481997	177	strongHypo	-0.139	0.039	Distal Intergenic	473027	474588	1562	+	CIL0998S0025
scaffold75237	616427	616591	165	strongHypo	-0.121	0.00483	Distal Intergenic	602682	603577	896	-	CIL0998S0031
scaffold75237	641096	641323	228	strongHypo	-0.125	6.92e-06	Intron (CIL0998S0033.mRNA/CIL0998S0033, intron 4 of 13)	637709	668261	30553	+	CIL0998S0033
scaffold75237	642558	642815	258	strongHypo	-0.181	8.61e-11	Intron (CIL0998S0033.mRNA/CIL0998S0033, intron 4 of 13)	637709	668261	30553	+	CIL0998S0033
scaffold75237	748520	748627	108	strongHypo	-0.191	0.0098	Distal Intergenic	759669	804308	44640	+	CIL0998S0035
scaffold75237	761471	761793	323	strongHyper	0.151	0.000121	Intron (CIL0998S0035.mRNA/CIL0998S0035, intron 1 of 12)	759669	804308	44640	+	CIL0998S0035
scaffold75237	771844	772074	231	strongHypo	-0.116	0.00032	Intron (CIL0998S0035.mRNA/CIL0998S0035, intron 1 of 12)	759669	804308	44640	+	CIL0998S0035
scaffold75237	776214	776321	108	strongHypo	-0.274	7.27e-08	Intron (CIL0998S0035.mRNA/CIL0998S0035, intron 1 of 12)	759669	804308	44640	+	CIL0998S0035
scaffold75237	791107	791272	166	strongHypo	-0.231	4.79e-08	Intron (CIL0998S0035.mRNA/CIL0998S0035, intron 9 of 12)	805168	805592	425	-	CIL0998S0036
scaffold75237	891041	891140	100	strongHyper	0.176	1.27e-05	Intron (CIL0998S0041.mRNA/CIL0998S0041, intron 17 of 19)	904821	909788	4968	-	CIL0998S0042
scaffold75237	1235571	1235786	216	strongHyper	0.238	0.000453	Intron (CIL0998S0062.mRNA/CIL0998S0062, intron 4 of 12)	1231032	1243273	12242	+	CIL0998S0062
scaffold75237	1289066	1289122	57	strongHypo	-0.152	0.00307	Intron (CIL0998S0067.mRNA/CIL0998S0067, intron 1 of 1)	1287968	1290546	2579	-	CIL0998S0067
scaffold75237	1307514	1307527	14	strongHyper	0.212	2.79e-06	Intron (CIL0998S0068.mRNA/CIL0998S0068, intron 1 of 2)	1305040	1309859	4820	+	CIL0998S0068
scaffold75237	1507232	1507311	80	strongHyper	0.227	0.00407	Distal Intergenic	1508235	1514940	6706	-	CIL0998S0081
scaffold75237	1507836	1507908	73	strongHyper	0.186	1.04e-06	Distal Intergenic	1508235	1514940	6706	-	CIL0998S0081
scaffold75237	1584441	1584499	59	strongHypo	-0.206	3.36e-07	Distal Intergenic	1592866	1596452	3587	-	CIL0998S0083
scaffold75237	1709019	1709078	60	strongHyper	0.244	1.79e-05	Promoter (<=1kb)	1707090	1708103	1014	-	CIL0998S0092
scaffold75237	1735218	1735275	58	strongHypo	-0.183	5.62e-05	Distal Intergenic	1721672	1721941	270	-	CIL0998S0094
scaffold75237	1841086	1841138	53	strongHyper	0.22	0.00423	Distal Intergenic	1830506	1834658	4153	+	CIL0998S0104
scaffold75237	2163487	2163544	58	strongHypo	-0.178	1.35e-05	Distal Intergenic	2165088	2174954	9867	-	CIL0998S0115
scaffold75237	2239284	2239307	24	strongHypo	-0.29	0.000125	Exon (CIL0998S0116.mRNA/CIL0998S0116, exon 8 of 8)	2235202	2239823	4622	+	CIL0998S0116
scaffold75237	2471627	2471816	190	strongHyper	0.126	2.84e-05	Distal Intergenic	2442850	2447620	4771	+	CIL0998S0125
scaffold75237	2472163	2472231	69	strongHyper	0.138	5.86e-05	Distal Intergenic	2442850	2447620	4771	+	CIL0998S0125
scaffold75348	85535	85590	56	strongHypo	-0.279	7.05e-07	Distal Intergenic	87061	91610	4550	-	CIL1001S0018
scaffold75348	184131	184233	103	strongHyper	0.12	0.0141	Intron (CIL1001S0027.mRNA/CIL1001S0027, intron 4 of 5)	181366	185537	4172	+	CIL1001S0027
scaffold75348	229966	230764	799	strongHypo	-0.102	0.0363	Distal Intergenic	205218	220539	15322	-	CIL1001S0029
scaffold75348	285997	286253	257	strongHypo	-0.122	0.000136	Distal Intergenic	261077	263459	2383	+	CIL1001S0030
scaffold75348	305071	305361	291	strongHypo	-0.163	3.69e-07	Distal Intergenic	261077	263459	2383	+	CIL1001S0030
scaffold75348	317558	317698	141	strongHyper	0.208	2.18e-05	Distal Intergenic	261077	263459	2383	+	CIL1001S0030
scaffold75348	494485	494578	94	strongHypo	-0.291	5.29e-06	Distal Intergenic	497246	497958	713	-	CIL1001S0033
scaffold75348	604410	604658	249	strongHyper	0.14	0.000339	Exon (CIL1001S0039.mRNA/CIL1001S0039, exon 5 of 10)	603261	607842	4582	+	CIL1001S0039
scaffold75348	696129	696155	27	strongHyper	0.279	1.46e-08	Distal Intergenic	718608	731988	13381	+	CIL1001S0044
scaffold75348	773099	773254	156	strongHypo	-0.123	7.04e-05	Promoter (2-3kb)	762103	770867	8765	-	CIL1001S0047
scaffold75348	780488	780910	423	strongHypo	-0.146	0.000111	Distal Intergenic	762103	770867	8765	-	CIL1001S0047
scaffold75348	806835	806910	76	strongHyper	0.323	3.69e-09	Distal Intergenic	799300	804431	5132	+	CIL1001S0048
scaffold75348	829439	829455	17	strongHyper	0.409	2.08e-06	Distal Intergenic	831783	850597	18815	-	CIL1001S0049
scaffold75348	875133	875147	15	strongHyper	0.146	2.37e-07	Exon (CIL1001S0051.mRNA/CIL1001S0051, exon 2 of 2)	873438	876166	2729	+	CIL1001S0051
scaffold75348	878412	878493	82	strongHyper	0.204	6.21e-08	Distal Intergenic	873438	876166	2729	+	CIL1001S0051
scaffold75348	895593	895603	11	strongHyper	0.209	5.71e-06	Distal Intergenic	873438	876166	2729	+	CIL1001S0051
scaffold75348	922814	922999	186	strongHyper	0.162	9.92e-05	Distal Intergenic	924053	928386	4334	-	CIL1001S0052
scaffold75348	1003119	1003202	84	strongHypo	-0.179	0.000764	Promoter (2-3kb)	1006047	1059885	53839	+	CIL1001S0055
scaffold75348	1004183	1004442	260	strongHypo	-0.146	7.89e-06	Promoter (1-2kb)	1006047	1059885	53839	+	CIL1001S0055
scaffold75348	1041614	1041671	58	strongHyper	0.189	0.00195	Intron (CIL1001S0055.mRNA/CIL1001S0055, intron 1 of 5)	1006047	1059885	53839	+	CIL1001S0055
scaffold75348	1044572	1045193	622	strongHypo	-0.103	3.57e-07	Intron (CIL1001S0055.mRNA/CIL1001S0055, intron 1 of 5)	1006047	1059885	53839	+	CIL1001S0055
scaffold75348	1216282	1216344	63	strongHyper	0.345	3.81e-13	Distal Intergenic	1221176	1224535	3360	-	CIL1001S0061
scaffold75348	1269951	1270212	262	strongHyper	0.206	5.26e-06	Intron (CIL1001S0066.mRNA/CIL1001S0066, intron 1 of 5)	1267769	1273233	5465	-	CIL1001S0066
scaffold75348	1319029	1319098	70	strongHypo	-0.153	0.00128	Distal Intergenic	1324614	1326848	2235	-	CIL1001S0070
scaffold75348	1339895	1339934	40	strongHypo	-0.167	4.32e-05	Distal Intergenic	1324614	1326848	2235	-	CIL1001S0070
scaffold75348	1395384	1395434	51	strongHyper	0.392	2.13e-06	Distal Intergenic	1324614	1326848	2235	-	CIL1001S0070
scaffold75348	1506839	1506985	147	strongHypo	-0.15	7.74e-09	Distal Intergenic	1610401	1611342	942	-	CIL1001S0074
scaffold75348	1678671	1678739	69	strongHypo	-0.249	1.7e-05	Distal Intergenic	1680103	1682031	1929	-	CIL1001S0077
scaffold75348	1877656	1877993	338	strongHypo	-0.202	2.7e-07	Distal Intergenic	1881327	1882265	939	-	CIL1001S0094
scaffold75348	1906606	1906646	41	strongHyper	0.355	2.41e-06	Distal Intergenic	1910764	1911636	873	+	CIL1001S0097
scaffold75348	1930775	1930813	39	strongHypo	-0.308	2.03e-06	Distal Intergenic	1926189	1927072	884	-	CIL1001S0100
scaffold75348	1961704	1961743	40	strongHypo	-0.231	0.000132	Promoter (1-2kb)	1963404	1964518	1115	+	CIL1001S0106
scaffold75348	2001024	2001092	69	strongHyper	0.334	5.9e-09	Distal Intergenic	2010539	2012937	2399	+	CIL1001S0110
scaffold75348	2099535	2099843	309	strongHypo	-0.129	3.75e-05	Distal Intergenic	2100670	2101629	960	-	CIL1001S0114
scaffold75570	107992	108095	104	strongHyper	0.224	0.00144	Intron (CIL1002S0012.mRNA/CIL1002S0012, intron 3 of 4)	104541	111477	6937	+	CIL1002S0012
scaffold75570	263940	263953	14	strongHypo	-0.321	9.04e-07	Intron (CIL1002S0020.mRNA/CIL1002S0020, intron 3 of 4)	262408	273256	10849	+	CIL1002S0020
scaffold75570	530769	531019	251	strongHypo	-0.112	0.00016	Exon (CIL1002S0038.mRNA/CIL1002S0038, exon 4 of 11)	528780	538583	9804	+	CIL1002S0038
scaffold75570	664053	664114	62	strongHypo	-0.307	1.57e-09	Distal Intergenic	669666	670313	648	+	CIL1002S0047
scaffold75570	804219	804462	244	strongHypo	-0.142	7.51e-05	Distal Intergenic	817439	818459	1021	+	CIL1002S0055
scaffold75570	829551	829743	193	strongHypo	-0.117	0.000339	Distal Intergenic	824529	825456	928	+	CIL1002S0056
scaffold75570	888869	888882	14	strongHyper	0.312	2.47e-08	Distal Intergenic	824529	825456	928	+	CIL1002S0056
scaffold75570	1154778	1154827	50	strongHyper	0.308	5.55e-05	Distal Intergenic	1158761	1159933	1173	+	CIL1002S0073
scaffold75570	1186814	1186876	63	strongHypo	-0.317	1.17e-12	Distal Intergenic	1180618	1182927	2310	-	CIL1002S0075
scaffold75570	1233627	1233634	8	strongHyper	0.211	2.32e-06	Intron (CIL1002S0076.mRNA/CIL1002S0076, intron 8 of 10)	1208253	1240883	32631	+	CIL1002S0076
scaffold75570	1290219	1290421	203	strongHyper	0.203	1.53e-09	Distal Intergenic	1287842	1289889	2048	+	CIL1002S0079
scaffold75570	1343871	1343993	123	strongHyper	0.265	6.12e-07	Distal Intergenic	1372783	1377547	4765	-	CIL1002S0080
scaffold75570	1386025	1386329	305	strongHyper	0.106	0.000101	Distal Intergenic	1372783	1377547	4765	-	CIL1002S0080
scaffold75570	1406194	1406217	24	strongHyper	0.22	0.000553	Distal Intergenic	1411261	1415877	4617	-	CIL1002S0081
scaffold75570	1409963	1410416	454	strongHypo	-0.146	2.68e-06	Distal Intergenic	1411261	1415877	4617	-	CIL1002S0081
scaffold75570	1421015	1421196	182	strongHyper	0.114	0.000147	Distal Intergenic	1411261	1415877	4617	-	CIL1002S0081
scaffold75570	1446747	1446848	102	strongHypo	-0.303	2.06e-07	Distal Intergenic	1454904	1462956	8053	+	CIL1002S0083
scaffold75570	1484860	1485153	294	strongHypo	-0.102	1.4e-05	Intron (CIL1002S0085.mRNA/CIL1002S0085, intron 7 of 8)	1480690	1495345	14656	+	CIL1002S0085
scaffold75570	1545625	1546962	1338	strongHyper	0.121	7.07e-13	Intron (CIL1002S0089.mRNA/CIL1002S0089, intron 2 of 5)	1544166	1549601	5436	-	CIL1002S0089
scaffold75570	1643575	1643658	84	strongHyper	0.218	3.91e-05	Distal Intergenic	1641266	1642016	751	+	CIL1002S0097
scaffold75570	2170775	2170983	209	strongHyper	0.162	0.000124	Exon (CIL1002S0123.mRNA/CIL1002S0123, exon 4 of 19)	2150996	2174448	23453	-	CIL1002S0123
scaffold75570	2244340	2244446	107	strongHypo	-0.332	7.35e-10	Intron (CIL1002S0129.mRNA/CIL1002S0129, intron 1 of 18)	2242135	2249644	7510	-	CIL1002S0129
scaffold75570	2281187	2281195	9	strongHyper	0.2	1.68e-05	Distal Intergenic	2288437	2290718	2282	-	CIL1002S0132
scaffold75681	62186	62202	17	strongHyper	0.243	4.05e-06	Intron (CIL1003S0006.mRNA/CIL1003S0006, intron 1 of 4)	60399	67124	6726	+	CIL1003S0006
scaffold75681	75382	75453	72	strongHyper	0.15	9.49e-06	Promoter (<=1kb)	67223	75407	8185	-	CIL1003S0007
scaffold75681	157646	157943	298	strongHyper	0.115	5.49e-08	Promoter (1-2kb)	159058	162176	3119	+	CIL1003S0014
scaffold75681	376121	376399	279	strongHyper	0.126	3.54e-06	Exon (CIL1003S0043.mRNA/CIL1003S0043, exon 5 of 12)	374628	380064	5437	+	CIL1003S0043
scaffold75681	432572	432584	13	strongHyper	0.385	4.71e-09	Distal Intergenic	466633	469914	3282	-	CIL1003S0047
scaffold75681	567974	568193	220	strongHypo	-0.155	6.69e-05	Promoter (1-2kb)	566132	566380	249	-	CIL1003S0053
scaffold75681	600905	601101	197	strongHyper	0.146	2.7e-05	Exon (CIL1003S0059.mRNA/CIL1003S0059, exon 2 of 4)	598769	602474	3706	-	CIL1003S0059
scaffold75681	618554	618631	78	strongHyper	0.227	1.96e-07	Intron (CIL1003S0062.mRNA/CIL1003S0062, intron 7 of 7)	612629	620469	7841	+	CIL1003S0062
scaffold75681	815255	815601	347	strongHyper	0.181	7.68e-11	Intron (CIL1003S0080.mRNA/CIL1003S0080, intron 2 of 10)	796173	806073	9901	+	CIL1003S0079
scaffold75681	824469	824689	221	strongHyper	0.147	7.02e-06	Intron (CIL1003S0080.mRNA/CIL1003S0080, intron 4 of 10)	796173	806073	9901	+	CIL1003S0079
scaffold75681	826539	826860	322	strongHypo	-0.159	2.23e-07	Exon (CIL1003S0080.mRNA/CIL1003S0080, exon 7 of 11)	796173	806073	9901	+	CIL1003S0079
scaffold75681	829380	829559	180	strongHypo	-0.222	9.58e-09	Intron (CIL1003S0080.mRNA/CIL1003S0080, intron 5 of 10)	796173	806073	9901	+	CIL1003S0079
scaffold75681	841455	841743	289	strongHyper	0.186	7.03e-15	Intron (CIL1003S0080.mRNA/CIL1003S0080, intron 5 of 10)	812614	865400	52787	-	CIL1003S0080
scaffold75681	845709	845968	260	strongHyper	0.184	3.1e-05	Intron (CIL1003S0080.mRNA/CIL1003S0080, intron 5 of 10)	812614	865400	52787	-	CIL1003S0080
scaffold75681	907928	907970	43	strongHyper	0.168	2.61e-07	Distal Intergenic	886434	904354	17921	-	CIL1003S0082
scaffold75681	991954	992393	440	strongHyper	0.132	1.6e-06	Intron (CIL1003S0087.mRNA/CIL1003S0087, intron 14 of 21)	983120	1004979	21860	+	CIL1003S0087
scaffold75681	1023097	1023105	9	strongHypo	-0.363	7.63e-07	Intron (CIL1003S0091.mRNA/CIL1003S0091, intron 2 of 18)	1022447	1053322	30876	+	CIL1003S0091
scaffold75681	1029792	1030042	251	strongHyper	0.202	3.62e-07	Intron (CIL1003S0091.mRNA/CIL1003S0091, intron 4 of 18)	1022447	1053322	30876	+	CIL1003S0091
scaffold75681	1031298	1031693	396	strongHypo	-0.122	0.00107	Intron (CIL1003S0091.mRNA/CIL1003S0091, intron 4 of 18)	1022447	1053322	30876	+	CIL1003S0091
scaffold75681	1079882	1079902	21	strongHyper	0.202	2.09e-05	Promoter (2-3kb)	1082000	1084113	2114	+	CIL1003S0093
scaffold75681	1152377	1152523	147	strongHypo	-0.207	1.24e-06	Distal Intergenic	1082000	1084113	2114	+	CIL1003S0093
scaffold75681	1164782	1165026	245	strongHyper	0.163	8.37e-05	Distal Intergenic	1225396	1226205	810	+	CIL1003S0094
scaffold75681	1167518	1167693	176	strongHyper	0.211	4.76e-07	Distal Intergenic	1225396	1226205	810	+	CIL1003S0094
scaffold75681	1263801	1263819	19	strongHypo	-0.247	3.62e-06	Distal Intergenic	1253040	1254273	1234	+	CIL1003S0096
scaffold75681	1321914	1321967	54	strongHyper	0.191	1.72e-06	Distal Intergenic	1327706	1340328	12623	+	CIL1003S0103
scaffold75681	1344676	1345037	362	strongHypo	-0.249	1.02e-05	Distal Intergenic	1361549	1362993	1445	+	CIL1003S0104
scaffold75681	1637559	1637622	64	strongHyper	0.159	1.53e-07	Intron (CIL1003S0117.mRNA/CIL1003S0117, intron 2 of 6)	1635961	1641302	5342	-	CIL1003S0117
scaffold75681	1681312	1681346	35	strongHyper	0.257	5.11e-07	Intron (CIL1003S0119.mRNA/CIL1003S0119, intron 9 of 11)	1666429	1686509	20081	+	CIL1003S0119
scaffold75681	1749534	1749720	187	strongHyper	0.155	1.05e-07	Intron (CIL1003S0123.mRNA/CIL1003S0123, intron 1 of 13)	1748216	1792151	43936	+	CIL1003S0123
scaffold75681	1757139	1757434	296	strongHyper	0.116	0.00273	Intron (CIL1003S0123.mRNA/CIL1003S0123, intron 1 of 13)	1748216	1792151	43936	+	CIL1003S0123
scaffold75681	1764427	1764744	318	strongHyper	0.174	1.55e-15	Intron (CIL1003S0123.mRNA/CIL1003S0123, intron 10 of 13)	1748216	1792151	43936	+	CIL1003S0123
scaffold75681	1769614	1769700	87	strongHyper	0.2	0.000407	Intron (CIL1003S0123.mRNA/CIL1003S0123, intron 10 of 13)	1748216	1792151	43936	+	CIL1003S0123
scaffold75681	1782441	1782452	12	strongHypo	-0.236	1.48e-08	Intron (CIL1003S0123.mRNA/CIL1003S0123, intron 12 of 13)	1748216	1792151	43936	+	CIL1003S0123
scaffold75681	1937575	1937644	70	strongHyper	0.189	1.69e-05	Distal Intergenic	1914871	1928663	13793	+	CIL1003S0127
scaffold75681	2022003	2022277	275	strongHyper	0.28	1.63e-13	Promoter (<=1kb)	2022970	2024666	1697	+	CIL1003S0128
scaffold75681	2045948	2045992	45	strongHypo	-0.139	1.28e-05	Distal Intergenic	2032273	2041959	9687	-	CIL1003S0130
scaffold75681	2066564	2066592	29	strongHyper	0.228	9.58e-10	Distal Intergenic	2032273	2041959	9687	-	CIL1003S0130
scaffold75681	2186767	2186953	187	strongHypo	-0.15	1.09e-05	Distal Intergenic	2209491	2211424	1934	+	CIL1003S0135
scaffold75681	2226672	2226789	118	strongHypo	-0.162	1.33e-05	Distal Intergenic	2236284	2239740	3457	-	CIL1003S0136
scaffold75681	2285196	2285349	154	strongHypo	-0.168	1.03e-06	Distal Intergenic	2292990	2297116	4127	+	CIL1003S0138
scaffold75681	2338579	2338665	87	strongHyper	0.168	0.00349	Distal Intergenic	2342034	2346486	4453	+	CIL1003S0142
scaffold75904	20303	20568	266	strongHyper	0.187	3.92e-11	Distal Intergenic	31719	58038	26320	+	CIL1006S0001
scaffold75904	56807	56859	53	strongHyper	0.238	2.64e-05	Intron (CIL1006S0001.mRNA/CIL1006S0001, intron 13 of 13)	60633	67430	6798	-	CIL1006S0002
scaffold75904	82802	82970	169	strongHyper	0.129	0.0114	Intron (CIL1006S0004.mRNA/CIL1006S0004, intron 2 of 7)	80299	96836	16538	-	CIL1006S0004
scaffold75904	154675	154797	123	strongHypo	-0.154	1.18e-05	Distal Intergenic	159591	161012	1422	+	CIL1006S0006
scaffold75904	206309	206668	360	strongHypo	-0.151	6.22e-06	Intron (CIL1006S0008.mRNA/CIL1006S0008, intron 1 of 2)	204281	214683	10403	+	CIL1006S0008
scaffold75904	351947	352079	133	strongHyper	0.145	0.0006	Intron (CIL1006S0013.mRNA/CIL1006S0013, intron 6 of 11)	341618	362305	20688	-	CIL1006S0013
scaffold75904	442991	443033	43	strongHyper	0.176	4.39e-07	Distal Intergenic	443855	455448	11594	-	CIL1006S0017
scaffold75904	466721	467260	540	strongHypo	-0.232	2.76e-12	Distal Intergenic	471735	476366	4632	-	CIL1006S0019
scaffold75904	796693	796914	222	strongHypo	-0.107	0.000281	Distal Intergenic	821044	832827	11784	+	CIL1006S0036
scaffold75904	879396	879444	49	strongHypo	-0.27	1.23e-05	Distal Intergenic	884671	885521	851	+	CIL1006S0038
scaffold75904	939190	939584	395	strongHypo	-0.104	0.000537	Distal Intergenic	940549	959295	18747	-	CIL1006S0040
scaffold75904	949518	949623	106	strongHypo	-0.152	0.000962	Intron (CIL1006S0040.mRNA/CIL1006S0040, intron 2 of 6)	940549	959295	18747	-	CIL1006S0040
scaffold75904	951577	951723	147	strongHyper	0.221	2.18e-05	Intron (CIL1006S0040.mRNA/CIL1006S0040, intron 2 of 6)	940549	959295	18747	-	CIL1006S0040
scaffold75904	987830	987904	75	strongHypo	-0.17	3.37e-08	Distal Intergenic	990627	996273	5647	-	CIL1006S0042
scaffold75904	1128850	1129081	232	strongHyper	0.116	1.34e-09	Distal Intergenic	1058995	1064519	5525	-	CIL1006S0045
scaffold75904	1244139	1244526	388	strongHypo	-0.137	9.65e-08	Promoter (1-2kb)	1239670	1242873	3204	-	CIL1006S0055
scaffold75904	1525696	1525924	229	strongHyper	0.205	3.24e-05	Intron (CIL1006S0076.mRNA/CIL1006S0076, intron 1 of 1)	1523838	1528346	4509	-	CIL1006S0076
scaffold75904	1583513	1583695	183	strongHyper	0.203	5e-07	Intron (CIL1006S0084.mRNA/CIL1006S0084, intron 2 of 3)	1581057	1590241	9185	+	CIL1006S0084
scaffold75904	1607415	1607583	169	strongHyper	0.127	0.0013	Intron (CIL1006S0087.mRNA/CIL1006S0087, intron 12 of 27)	1596364	1598432	2069	-	CIL1006S0086
scaffold75904	1614104	1614202	99	strongHyper	0.141	0.00243	Exon (CIL1006S0087.mRNA/CIL1006S0087, exon 16 of 28)	1596364	1598432	2069	-	CIL1006S0086
scaffold75904	1622126	1622151	26	strongHyper	0.263	1.27e-06	Intron (CIL1006S0087.mRNA/CIL1006S0087, intron 23 of 27)	1599872	1632517	32646	-	CIL1006S0087
scaffold75904	1649841	1649921	81	strongHyper	0.166	2.77e-08	Intron (CIL1006S0088.mRNA/CIL1006S0088, intron 12 of 27)	1641144	1665729	24586	+	CIL1006S0088
scaffold75904	1650550	1650571	22	strongHypo	-0.268	0.000316	Exon (CIL1006S0088.mRNA/CIL1006S0088, exon 13 of 28)	1641144	1665729	24586	+	CIL1006S0088
scaffold75904	1846221	1846427	207	strongHypo	-0.123	0.000631	Distal Intergenic	1821552	1822420	869	+	CIL1006S0108
scaffold75904	1860346	1860391	46	strongHypo	-0.296	1.27e-11	Distal Intergenic	1821552	1822420	869	+	CIL1006S0108
scaffold75904	1897738	1898029	292	strongHypo	-0.153	0.000643	Distal Intergenic	1906294	1909975	3682	-	CIL1006S0110
scaffold75904	1901295	1901392	98	strongHypo	-0.104	1.19e-05	Distal Intergenic	1906294	1909975	3682	-	CIL1006S0110
scaffold75904	1905868	1905882	15	strongHyper	0.212	1.44e-08	Distal Intergenic	1906294	1909975	3682	-	CIL1006S0110
scaffold75904	1931961	1931971	11	strongHypo	-0.196	8.69e-06	Distal Intergenic	1914954	1922252	7299	-	CIL1006S0111
scaffold75904	2127367	2127435	69	strongHyper	0.246	0.00124	Distal Intergenic	2118222	2122514	4293	+	CIL1006S0118
scaffold75904	2137986	2138075	90	strongHyper	0.154	0.00884	Distal Intergenic	2118222	2122514	4293	+	CIL1006S0118
scaffold75904	2236374	2236486	113	strongHyper	0.169	0.000268	Distal Intergenic	2244778	2253756	8979	-	CIL1006S0127
scaffold76348	17024	17086	63	strongHypo	-0.114	0.00187	Promoter (1-2kb)	13694	15639	1946	-	CIL1009S0003
scaffold76348	85122	85220	99	strongHyper	0.126	8.18e-06	Intron (CIL1009S0012.mRNA/CIL1009S0012, intron 2 of 16)	71851	77536	5686	-	CIL1009S0011
scaffold76348	112439	112447	9	strongHyper	0.168	1.79e-06	Intron (CIL1009S0013.mRNA/CIL1009S0013, intron 4 of 5)	107514	115078	7565	-	CIL1009S0013
scaffold76348	120966	121091	126	strongHypo	-0.209	3.06e-11	Intron (CIL1009S0014.mRNA/CIL1009S0014, intron 8 of 13)	116484	122934	6451	-	CIL1009S0014
scaffold76348	351170	351256	87	strongHypo	-0.114	0.00332	Intron (CIL1009S0039.mRNA/CIL1009S0039, intron 1 of 4)	349108	352497	3390	+	CIL1009S0039
scaffold76348	376926	376964	39	strongHyper	0.256	2.57e-05	Intron (CIL1009S0040.mRNA/CIL1009S0040, intron 11 of 14)	359529	386743	27215	+	CIL1009S0040
scaffold76348	431698	431928	231	strongHyper	0.283	8.2e-07	Distal Intergenic	431191	431529	339	+	CIL1009S0044
scaffold76348	452491	452717	227	strongHypo	-0.146	2.1e-06	Distal Intergenic	440403	446236	5834	-	CIL1009S0045
scaffold76348	494422	494457	36	strongHypo	-0.176	0.000908	Distal Intergenic	515678	516193	516	+	CIL1009S0048
scaffold76348	552756	553005	250	strongHypo	-0.11	0.00389	Distal Intergenic	516209	532484	16276	+	CIL1009S0049
scaffold76348	662375	662403	29	strongHypo	-0.121	0.00155	Distal Intergenic	665025	670623	5599	-	CIL1009S0054
scaffold76348	681732	681790	59	strongHyper	0.273	8.18e-07	Exon (CIL1009S0055.mRNA/CIL1009S0055, exon 12 of 13)	665025	670623	5599	-	CIL1009S0054
scaffold76348	885506	885711	206	strongHypo	-0.147	2.09e-06	Intron (CIL1009S0073.mRNA/CIL1009S0073, intron 2 of 6)	882996	893636	10641	+	CIL1009S0073
scaffold76348	1102806	1102923	118	strongHypo	-0.353	1.21e-07	Distal Intergenic	1107639	1112726	5088	-	CIL1009S0096
scaffold76348	1130901	1131011	111	strongHypo	-0.153	5.65e-05	Distal Intergenic	1127811	1130476	2666	+	CIL1009S0099
scaffold76348	1262923	1263038	116	strongHyper	0.254	1.73e-06	Distal Intergenic	1272610	1276793	4184	-	CIL1009S0103
scaffold76348	1266403	1266539	137	strongHyper	0.168	2.37e-05	Distal Intergenic	1272610	1276793	4184	-	CIL1009S0103
scaffold76348	1282775	1283089	315	strongHypo	-0.172	4.95e-09	Distal Intergenic	1272610	1276793	4184	-	CIL1009S0103
scaffold76348	1399379	1399580	202	strongHypo	-0.215	0.00011	Promoter (1-2kb)	1401280	1404337	3058	+	CIL1009S0111
scaffold76348	1414798	1414883	86	strongHypo	-0.165	1.33e-06	Exon (CIL1009S0112.mRNA/CIL1009S0112, exon 1 of 1)	1414474	1416315	1842	+	CIL1009S0112
scaffold76348	1440389	1440400	12	strongHyper	0.264	6.89e-06	Distal Intergenic	1416690	1418069	1380	-	CIL1009S0113
scaffold76348	1603630	1603943	314	strongHypo	-0.108	8e-10	Exon (CIL1009S0121.mRNA/CIL1009S0121, exon 3 of 3)	1603848	1604383	536	-	CIL1009S0121
scaffold76348	1706179	1706791	613	strongHypo	-0.494	6.63e-19	Distal Intergenic	1603848	1604383	536	-	CIL1009S0121
scaffold76348	1840120	1840247	128	strongHypo	-0.318	2.21e-05	Intron (CIL1009S0124.mRNA/CIL1009S0124, intron 2 of 9)	1838573	1856097	17525	+	CIL1009S0124
scaffold76348	1853001	1853256	256	strongHypo	-0.105	8.04e-05	Intron (CIL1009S0124.mRNA/CIL1009S0124, intron 7 of 9)	1838573	1856097	17525	+	CIL1009S0124
scaffold76348	1893594	1894017	424	strongHypo	-0.17	6.75e-09	Intron (CIL1009S0128.mRNA/CIL1009S0128, intron 2 of 29)	1888937	1947939	59003	+	CIL1009S0128
scaffold76348	1924079	1924185	107	strongHypo	-0.27	7.12e-06	Intron (CIL1009S0128.mRNA/CIL1009S0128, intron 15 of 29)	1949621	1952554	2934	+	CIL1009S0129
scaffold76348	2107634	2107913	280	strongHypo	-0.18	1.69e-13	Distal Intergenic	2091231	2100816	9586	-	CIL1009S0134
scaffold76348	2183842	2184068	227	strongHyper	0.103	0.000185	Distal Intergenic	2091231	2100816	9586	-	CIL1009S0134
scaffold76348	2196238	2196265	28	strongHyper	0.422	2.51e-18	Distal Intergenic	2091231	2100816	9586	-	CIL1009S0134
scaffold76348	2235577	2235622	46	strongHyper	0.19	1.36e-10	Distal Intergenic	2091231	2100816	9586	-	CIL1009S0134
scaffold76459	103255	103521	267	strongHyper	0.329	5.69e-07	Distal Intergenic	107131	117628	10498	+	CIL1012S0006
scaffold76459	127089	127284	196	strongHypo	-0.199	1.75e-10	Exon (CIL1012S0008.mRNA/CIL1012S0008, exon 7 of 17)	118888	121031	2144	-	CIL1012S0007
scaffold76459	132050	132320	271	strongHypo	-0.106	6.16e-06	Intron (CIL1012S0008.mRNA/CIL1012S0008, intron 11 of 16)	121865	134276	12412	-	CIL1012S0008
scaffold76459	239188	239574	387	strongHyper	0.213	1.04e-12	Intron (CIL1012S0020.mRNA/CIL1012S0020, intron 18 of 20)	230073	241781	11709	-	CIL1012S0020
scaffold76459	375910	376115	206	strongHyper	0.165	2.08e-09	Intron (CIL1012S0031.mRNA/CIL1012S0031, intron 10 of 48)	361161	363156	1996	-	CIL1012S0030
scaffold76459	386362	386539	178	strongHyper	0.112	0.000162	Intron (CIL1012S0031.mRNA/CIL1012S0031, intron 20 of 48)	361161	363156	1996	-	CIL1012S0030
scaffold76459	389620	389917	298	strongHypo	-0.105	5.81e-05	Intron (CIL1012S0031.mRNA/CIL1012S0031, intron 20 of 48)	361161	363156	1996	-	CIL1012S0030
scaffold76459	405258	405573	316	strongHypo	-0.124	0.00295	Intron (CIL1012S0031.mRNA/CIL1012S0031, intron 30 of 48)	361161	363156	1996	-	CIL1012S0030
scaffold76459	440382	440501	120	strongHyper	0.13	3.09e-09	Intron (CIL1012S0031.mRNA/CIL1012S0031, intron 37 of 48)	365153	468433	103281	-	CIL1012S0031
scaffold76459	441419	441635	217	strongHypo	-0.189	2.37e-07	Intron (CIL1012S0031.mRNA/CIL1012S0031, intron 37 of 48)	365153	468433	103281	-	CIL1012S0031
scaffold76459	455755	455790	36	strongHyper	0.336	6.77e-07	Intron (CIL1012S0031.mRNA/CIL1012S0031, intron 46 of 48)	365153	468433	103281	-	CIL1012S0031
scaffold76459	483376	483497	122	strongHypo	-0.21	0.00175	Promoter (<=1kb)	483861	492404	8544	+	CIL1012S0033
scaffold76459	512740	513017	278	strongHyper	0.219	9.19e-06	Intron (CIL1012S0036.mRNA/CIL1012S0036, intron 3 of 3)	509343	509783	441	+	CIL1012S0035
scaffold76459	692087	692098	12	strongHyper	0.194	3.03e-08	Intron (CIL1012S0057.mRNA/CIL1012S0057, intron 6 of 7)	686567	695430	8864	-	CIL1012S0057
scaffold76459	723926	724134	209	strongHypo	-0.106	8.33e-05	Promoter (2-3kb)	719383	722054	2672	-	CIL1012S0058
scaffold76459	747553	747881	329	strongHyper	0.104	0.000122	Intron (CIL1012S0060.mRNA/CIL1012S0060, intron 13 of 19)	758238	759056	819	+	CIL1012S0061
scaffold76459	748158	748311	154	strongHypo	-0.159	1.96e-07	Intron (CIL1012S0060.mRNA/CIL1012S0060, intron 13 of 19)	758238	759056	819	+	CIL1012S0061
scaffold76459	750960	751044	85	strongHyper	0.111	0.00185	Intron (CIL1012S0060.mRNA/CIL1012S0060, intron 13 of 19)	758238	759056	819	+	CIL1012S0061
scaffold76459	840936	840988	53	strongHyper	0.216	3.38e-09	Promoter (<=1kb)	841540	853088	11549	+	CIL1012S0069
scaffold76459	901928	902085	158	strongHypo	-0.221	0.000414	Distal Intergenic	911966	918710	6745	-	CIL1012S0074
scaffold76459	989423	989543	121	strongHypo	-0.171	5.42e-08	Distal Intergenic	950706	954128	3423	-	CIL1012S0075
scaffold76459	1162498	1162992	495	strongHyper	0.102	1.83e-08	Distal Intergenic	1149847	1150474	628	-	CIL1012S0084
scaffold76459	1179027	1179145	119	strongHyper	0.124	0.00166	Distal Intergenic	1191703	1193735	2033	+	CIL1012S0087
scaffold76459	1194179	1194209	31	strongHyper	0.134	0.000162	Distal Intergenic	1191703	1193735	2033	+	CIL1012S0087
scaffold76459	1194562	1194669	108	strongHyper	0.124	2.91e-05	Distal Intergenic	1191703	1193735	2033	+	CIL1012S0087
scaffold76459	1198720	1199651	932	strongHyper	0.149	4.23e-20	Distal Intergenic	1191703	1193735	2033	+	CIL1012S0087
scaffold76459	1373243	1373565	323	strongHyper	0.142	1.78e-07	5' UTR	1368366	1375134	6769	-	CIL1012S0102
scaffold76459	1441679	1441723	45	strongHyper	0.216	1.99e-32	Distal Intergenic	1422771	1423292	522	+	CIL1012S0109
scaffold76459	1583048	1583234	187	strongHyper	0.124	0.00964	Distal Intergenic	1570356	1570756	401	+	CIL1012S0119
scaffold76459	1655470	1655491	22	strongHyper	0.279	9.09e-06	Distal Intergenic	1663249	1663961	713	-	CIL1012S0124
scaffold76570	14516	14584	69	strongHypo	-0.225	9.68e-08	Promoter (2-3kb)	11096	12291	1196	-	CIL1015S0001
scaffold76570	279274	279279	6	strongHypo	-0.288	4.87e-06	Distal Intergenic	282375	286334	3960	-	CIL1015S0018
scaffold76570	372851	372881	31	strongHyper	0.237	9.79e-07	Intron (CIL1015S0027.mRNA/CIL1015S0027, intron 4 of 5)	363558	373910	10353	-	CIL1015S0027
scaffold76570	614126	614346	221	strongHypo	-0.253	1.43e-08	Distal Intergenic	604455	606005	1551	+	CIL1015S0038
scaffold76570	807618	807712	95	strongHyper	0.16	0.000351	Intron (CIL1015S0052.mRNA/CIL1015S0052, intron 1 of 1)	803576	811692	8117	+	CIL1015S0052
scaffold76570	962175	962308	134	strongHyper	0.215	1.69e-07	Distal Intergenic	973264	981738	8475	+	CIL1015S0061
scaffold76570	1031571	1031740	170	strongHypo	-0.187	2.69e-06	Distal Intergenic	1030665	1030886	222	+	CIL1015S0062
scaffold76570	1152902	1152931	30	strongHypo	-0.33	2.37e-08	Distal Intergenic	1148387	1148965	579	+	CIL1015S0074
scaffold76570	1167233	1167303	71	strongHypo	-0.205	2.02e-05	Intron (CIL1015S0076.mRNA/CIL1015S0076, intron 11 of 11)	1153573	1158132	4560	-	CIL1015S0075
scaffold76570	1248917	1249065	149	strongHypo	-0.2	5.77e-05	Distal Intergenic	1253730	1254839	1110	+	CIL1015S0080
scaffold76570	1543956	1544289	334	strongHyper	0.148	0.000153	Intron (CIL1015S0104.mRNA/CIL1015S0104, intron 3 of 26)	1538316	1577032	38717	+	CIL1015S0104
scaffold76570	1553595	1553777	183	strongHyper	0.315	4.15e-07	Intron (CIL1015S0104.mRNA/CIL1015S0104, intron 9 of 26)	1538316	1577032	38717	+	CIL1015S0104
scaffold76570	1556643	1556753	111	strongHypo	-0.37	4.27e-06	Intron (CIL1015S0104.mRNA/CIL1015S0104, intron 9 of 26)	1538316	1577032	38717	+	CIL1015S0104
scaffold76570	1747691	1747708	18	strongHypo	-0.141	0.000224	Distal Intergenic	1732166	1746531	14366	+	CIL1015S0112
scaffold76570	1824852	1824940	89	strongHypo	-0.193	2.37e-07	Promoter (2-3kb)	1827313	1840648	13336	+	CIL1015S0116
scaffold76570	1881685	1881760	76	strongHypo	-0.256	1.8e-06	Intron (CIL1015S0117.mRNA/CIL1015S0117, intron 3 of 3)	1878973	1882511	3539	+	CIL1015S0117
scaffold76570	1930502	1930666	165	strongHypo	-0.112	0.000514	Promoter (1-2kb)	1925429	1928769	3341	-	CIL1015S0120
scaffold76570	1970770	1970889	120	strongHyper	0.193	1.1e-13	Distal Intergenic	1966687	1969095	2409	+	CIL1015S0127
scaffold76681	13601	13681	81	strongHypo	-0.148	8.63e-06	Promoter (<=1kb)	11286	12920	1635	-	CIL1018S0001
scaffold76681	44338	44500	163	strongHypo	-0.155	4.28e-10	Promoter (1-2kb)	36418	42948	6531	-	CIL1018S0005
scaffold76681	128913	129058	146	strongHypo	-0.197	0.000192	Promoter (<=1kb)	129283	132708	3426	+	CIL1018S0015
scaffold76681	173863	173898	36	strongHypo	-0.132	0.000319	Promoter (1-2kb)	175738	188956	13219	+	CIL1018S0021
scaffold76681	359304	359424	121	strongHyper	0.1	0.000515	Distal Intergenic	352606	358866	6261	+	CIL1018S0028
scaffold76681	688212	688320	109	strongHyper	0.23	1.11e-05	Intron (CIL1018S0036.mRNA/CIL1018S0036, intron 14 of 21)	671207	695318	24112	+	CIL1018S0036
scaffold76681	792393	792411	19	strongHypo	-0.187	5.32e-05	Intron (CIL1018S0040.mRNA/CIL1018S0040, intron 9 of 9)	778651	796569	17919	-	CIL1018S0040
scaffold76681	809432	809450	19	strongHypo	-0.446	1.5e-08	Distal Intergenic	778651	796569	17919	-	CIL1018S0040
scaffold76681	864238	864550	313	strongHyper	0.139	1.72e-07	Distal Intergenic	858805	858996	192	-	CIL1018S0045
scaffold76681	1029509	1029550	42	strongHyper	0.446	1.79e-06	Distal Intergenic	1048205	1048854	650	-	CIL1018S0059
scaffold76681	1115952	1115974	23	strongHypo	-0.303	1.7e-06	Intron (CIL1018S0063.mRNA/CIL1018S0063, intron 2 of 5)	1113451	1119549	6099	+	CIL1018S0063
scaffold76681	1282650	1282777	128	strongHypo	-0.243	6.08e-09	Distal Intergenic	1266528	1268268	1741	+	CIL1018S0073
scaffold76681	1306108	1306406	299	strongHyper	0.132	2.16e-06	Distal Intergenic	1330908	1331773	866	+	CIL1018S0077
scaffold76681	1340908	1340925	18	strongHyper	0.218	0.000164	Intron (CIL1018S0078.mRNA/CIL1018S0078, intron 12 of 15)	1335666	1343918	8253	-	CIL1018S0078
scaffold76681	1351615	1351861	247	strongHypo	-0.156	0.0145	Intron (CIL1018S0079.mRNA/CIL1018S0079, intron 3 of 6)	1345530	1358409	12880	-	CIL1018S0079
scaffold76681	1652580	1652880	301	strongHypo	-0.206	5.91e-15	Distal Intergenic	1630619	1630807	189	+	CIL1018S0098
scaffold76681	1818429	1818535	107	strongHypo	-0.298	1.46e-08	Intron (CIL1018S0118.mRNA/CIL1018S0118, intron 19 of 19)	1808050	1822114	14065	-	CIL1018S0118
scaffold76792	29366	29466	101	strongHypo	-0.107	6.59e-06	Distal Intergenic	29817	30733	917	-	CIL1020S0004
scaffold76792	90687	90714	28	strongHypo	-0.25	9.69e-07	Distal Intergenic	94013	101645	7633	-	CIL1020S0006
scaffold76792	101165	101340	176	strongHypo	-0.136	1.81e-05	Exon (CIL1020S0006.mRNA/CIL1020S0006, exon 1 of 4)	94013	101645	7633	-	CIL1020S0006
scaffold76792	204698	205118	421	strongHypo	-0.105	4.53e-06	Distal Intergenic	197326	200687	3362	-	CIL1020S0016
scaffold76792	229040	229072	33	strongHyper	0.313	1.59e-13	Intron (CIL1020S0018.mRNA/CIL1020S0018, intron 2 of 2)	226901	230059	3159	-	CIL1020S0018
scaffold76792	250808	251074	267	strongHypo	-0.126	2.15e-06	Distal Intergenic	257580	261204	3625	+	CIL1020S0022
scaffold76792	318202	318442	241	strongHyper	0.132	8.33e-09	Intron (CIL1020S0033.mRNA/CIL1020S0033, intron 2 of 4)	316951	320077	3127	-	CIL1020S0033
scaffold76792	406650	406892	243	strongHyper	0.159	1.71e-06	Distal Intergenic	398570	401137	2568	+	CIL1020S0046
scaffold76792	435669	435866	198	strongHyper	0.138	1.88e-05	Intron (CIL1020S0051.mRNA/CIL1020S0051, intron 2 of 9)	430552	432188	1637	-	CIL1020S0049
scaffold76792	615277	615562	286	strongHyper	0.12	3.84e-05	Promoter (1-2kb)	616650	619527	2878	+	CIL1020S0074
scaffold76792	615737	615934	198	strongHypo	-0.137	1.4e-06	Promoter (<=1kb)	616650	619527	2878	+	CIL1020S0074
scaffold76792	663932	664090	159	strongHypo	-0.378	3.74e-13	Distal Intergenic	654831	656053	1223	-	CIL1020S0080
scaffold76792	672361	672525	165	strongHyper	0.146	0.000135	Distal Intergenic	654831	656053	1223	-	CIL1020S0080
scaffold76792	680403	680943	541	strongHypo	-0.228	1.69e-18	Distal Intergenic	654831	656053	1223	-	CIL1020S0080
scaffold76792	690264	690347	84	strongHypo	-0.188	0.000129	Distal Intergenic	704976	707176	2201	-	CIL1020S0081
scaffold76792	696289	696696	408	strongHypo	-0.21	0.000783	Distal Intergenic	704976	707176	2201	-	CIL1020S0081
scaffold76792	811181	811275	95	strongHypo	-0.28	8.57e-11	Distal Intergenic	827518	829036	1519	-	CIL1020S0087
scaffold76792	915787	915809	23	strongHyper	0.344	1.13e-05	Intron (CIL1020S0094.mRNA/CIL1020S0094, intron 2 of 5)	914183	919551	5369	+	CIL1020S0094
scaffold76792	1098005	1098206	202	strongHypo	-0.124	0.000233	Distal Intergenic	1090293	1094205	3913	-	CIL1020S0105
scaffold76792	1148591	1148749	159	strongHyper	0.24	7.73e-12	Promoter (<=1kb)	1140253	1147934	7682	-	CIL1020S0106
scaffold76792	1351076	1351328	253	strongHyper	0.15	0.00024	Distal Intergenic	1359951	1367800	7850	+	CIL1020S0121
scaffold76792	1394227	1394359	133	strongHypo	-0.148	0.00308	Distal Intergenic	1359951	1367800	7850	+	CIL1020S0121
scaffold76903	81588	81661	74	strongHypo	-0.359	1.76e-24	Distal Intergenic	58309	59699	1391	-	CIL1021S0005
scaffold76903	215361	215550	190	strongHypo	-0.112	0.000335	Distal Intergenic	262441	263988	1548	-	CIL1021S0017
scaffold76903	241653	241906	254	strongHypo	-0.139	0.00106	Distal Intergenic	262441	263988	1548	-	CIL1021S0017
scaffold76903	492795	493007	213	strongHyper	0.118	0.000576	Exon (CIL1021S0025.mRNA/CIL1021S0025, exon 15 of 21)	483095	507084	23990	+	CIL1021S0025
scaffold76903	940317	940364	48	strongHypo	-0.224	6.08e-05	Distal Intergenic	946224	949372	3149	+	CIL1021S0039
scaffold76903	1307327	1307335	9	strongHypo	-0.201	1.56e-07	Intron (CIL1021S0077.mRNA/CIL1021S0077, intron 6 of 9)	1305270	1312232	6963	+	CIL1021S0077
scaffold76903	1338130	1338199	70	strongHyper	0.209	0.00993	Distal Intergenic	1341367	1344500	3134	+	CIL1021S0084
scaffold76903	1338610	1338632	23	strongHyper	0.181	0.00105	Promoter (2-3kb)	1341367	1344500	3134	+	CIL1021S0084
scaffold76903	1482989	1483169	181	strongHypo	-0.155	3.91e-07	Promoter (1-2kb)	1476532	1481575	5044	-	CIL1021S0106
scaffold76903	1675540	1675605	66	strongHypo	-0.137	4.69e-06	Distal Intergenic	1664412	1665669	1258	+	CIL1021S0114
scaffold76903	1748730	1748995	266	strongHypo	-0.491	1.26e-15	Distal Intergenic	1682192	1692663	10472	-	CIL1021S0115
scaffold77015	66123	66175	53	strongHyper	0.237	4.85e-05	Promoter (<=1kb)	67033	75372	8340	+	CIL1023S0004
scaffold77015	113278	113313	36	strongHypo	-0.281	2.64e-07	Distal Intergenic	78015	80007	1993	-	CIL1023S0005
scaffold77015	136205	136219	15	strongHyper	0.294	1.58e-07	Distal Intergenic	78015	80007	1993	-	CIL1023S0005
scaffold77015	138570	138593	24	strongHypo	-0.269	1.94e-06	Distal Intergenic	78015	80007	1993	-	CIL1023S0005
scaffold77015	183084	183484	401	strongHyper	0.234	7.68e-09	Distal Intergenic	78015	80007	1993	-	CIL1023S0005
scaffold77015	184187	184203	17	strongHyper	0.186	2.61e-06	Distal Intergenic	78015	80007	1993	-	CIL1023S0005
scaffold77015	215788	216155	368	strongHypo	-0.15	9.15e-06	Distal Intergenic	78015	80007	1993	-	CIL1023S0005
scaffold77015	225749	225762	14	strongHyper	0.23	1.74e-07	Distal Intergenic	78015	80007	1993	-	CIL1023S0005
scaffold77015	256284	256324	41	strongHyper	0.257	5.46e-06	Distal Intergenic	375339	376262	924	-	CIL1023S0011
scaffold77015	256729	257167	439	strongHypo	-0.175	4.69e-05	Distal Intergenic	375339	376262	924	-	CIL1023S0011
scaffold77015	281590	281673	84	strongHyper	0.206	0.00121	Distal Intergenic	375339	376262	924	-	CIL1023S0011
scaffold77015	356295	356396	102	strongHyper	0.133	0.00157	Distal Intergenic	375339	376262	924	-	CIL1023S0011
scaffold77015	386524	386658	135	strongHypo	-0.189	0.000573	Distal Intergenic	379952	382268	2317	-	CIL1023S0012
scaffold77015	428392	428527	136	strongHypo	-0.173	8.33e-05	Distal Intergenic	411680	424042	12363	-	CIL1023S0014
scaffold77015	575106	575124	19	strongHypo	-0.195	0.00129	Intron (CIL1023S0028.mRNA/CIL1023S0028, intron 4 of 4)	570418	579715	9298	-	CIL1023S0028
scaffold77015	970242	970274	33	strongHypo	-0.138	6.75e-05	Promoter (<=1kb)	966746	969933	3188	-	CIL1023S0051
scaffold77015	1245162	1245369	208	strongHyper	0.134	0.00034	Distal Intergenic	1288724	1292814	4091	+	CIL1023S0063
scaffold77015	1517192	1517330	139	strongHypo	-0.192	0.00025	Distal Intergenic	1522720	1525252	2533	+	CIL1023S0086
scaffold77015	1602686	1603070	385	strongHypo	-0.134	7.61e-05	Distal Intergenic	1634608	1635825	1218	+	CIL1023S0088
scaffold77015	1609773	1610423	651	strongHyper	0.116	9.55e-19	Distal Intergenic	1634608	1635825	1218	+	CIL1023S0088
scaffold77015	1689156	1689301	146	strongHyper	0.166	1.19e-08	Promoter (2-3kb)	1673106	1686718	13613	-	CIL1023S0093
scaffold77015	1718403	1718600	198	strongHypo	-0.119	0.000152	Intron (CIL1023S0095.mRNA/CIL1023S0095, intron 3 of 4)	1713415	1720283	6869	-	CIL1023S0095
scaffold77126	55029	55066	38	strongHyper	0.13	7.48e-05	Distal Intergenic	58706	59125	420	+	CIL1025S0002
scaffold77126	55592	55610	19	strongHypo	-0.288	1.5e-05	Distal Intergenic	58706	59125	420	+	CIL1025S0002
scaffold77126	64581	64724	144	strongHyper	0.103	0.000305	Distal Intergenic	59152	60587	1436	+	CIL1025S0003
scaffold77126	139347	139427	81	strongHypo	-0.308	1.28e-08	Distal Intergenic	77606	84541	6936	-	CIL1025S0004
scaffold77126	275254	275351	98	strongHypo	-0.162	2.79e-05	Intron (CIL1025S0008.mRNA/CIL1025S0008, intron 2 of 3)	249265	286416	37152	+	CIL1025S0008
scaffold77126	308178	308392	215	strongHypo	-0.1	0.00025	Distal Intergenic	327992	329282	1291	+	CIL1025S0009
scaffold77126	328607	328924	318	strongHyper	0.115	1.31e-05	Exon (CIL1025S0009.mRNA/CIL1025S0009, exon 2 of 4)	327992	329282	1291	+	CIL1025S0009
scaffold77126	357381	357429	49	strongHyper	0.205	2.17e-05	Intron (CIL1025S0012.mRNA/CIL1025S0012, intron 10 of 15)	341810	368787	26978	-	CIL1025S0012
scaffold77126	360059	360299	241	strongHyper	0.124	0.000153	Intron (CIL1025S0012.mRNA/CIL1025S0012, intron 10 of 15)	341810	368787	26978	-	CIL1025S0012
scaffold77126	366473	366647	175	strongHypo	-0.125	0.000218	Intron (CIL1025S0012.mRNA/CIL1025S0012, intron 15 of 15)	341810	368787	26978	-	CIL1025S0012
scaffold77126	367619	368303	685	strongHypo	-0.145	5.07e-08	Intron (CIL1025S0012.mRNA/CIL1025S0012, intron 15 of 15)	341810	368787	26978	-	CIL1025S0012
scaffold77126	432608	432670	63	strongHyper	0.115	0.000285	Distal Intergenic	341810	368787	26978	-	CIL1025S0012
scaffold77126	460818	460896	79	strongHypo	-0.163	0.000329	Distal Intergenic	545319	545807	489	-	CIL1025S0014
scaffold77126	502195	502216	22	strongHyper	0.245	7.06e-07	Distal Intergenic	545319	545807	489	-	CIL1025S0014
scaffold77126	510734	510742	9	strongHyper	0.236	5.49e-05	Distal Intergenic	545319	545807	489	-	CIL1025S0014
scaffold77126	520915	521181	267	strongHypo	-0.128	9.14e-06	Distal Intergenic	545319	545807	489	-	CIL1025S0014
scaffold77126	721230	721239	10	strongHyper	0.188	0.000135	Distal Intergenic	698371	699048	678	-	CIL1025S0025
scaffold77126	740343	740762	420	strongHyper	0.132	0.000123	Exon (CIL1025S0026.mRNA/CIL1025S0026, exon 6 of 19)	734585	743588	9004	-	CIL1025S0026
scaffold77126	812182	812488	307	strongHypo	-0.155	4.41e-08	Distal Intergenic	800953	809631	8679	+	CIL1025S0030
scaffold77126	813749	813831	83	strongHypo	-0.347	6.38e-05	Distal Intergenic	800953	809631	8679	+	CIL1025S0030
scaffold77126	820502	820576	75	strongHypo	-0.281	1.36e-09	Distal Intergenic	800953	809631	8679	+	CIL1025S0030
scaffold77126	949340	949405	66	strongHyper	0.183	0.000663	Intron (CIL1025S0041.mRNA/CIL1025S0041, intron 2 of 3)	946529	950722	4194	-	CIL1025S0041
scaffold77126	991118	991203	86	strongHypo	-0.246	5.01e-07	Distal Intergenic	994910	996393	1484	-	CIL1025S0047
scaffold77126	1023043	1023497	455	strongHypo	-0.175	1.56e-13	Distal Intergenic	1026751	1032740	5990	+	CIL1025S0051
scaffold77126	1409628	1409729	102	strongHyper	0.311	9.13e-07	Intron (CIL1025S0095.mRNA/CIL1025S0095, intron 6 of 9)	1406472	1411898	5427	-	CIL1025S0095
scaffold77126	1539161	1539458	298	strongHyper	0.252	1.4e-10	Intron (CIL1025S0112.mRNA/CIL1025S0112, intron 4 of 5)	1535822	1541490	5669	+	CIL1025S0112
scaffold77126	1580146	1580205	60	strongHypo	-0.13	6.12e-10	Exon (CIL1025S0120.mRNA/CIL1025S0120, exon 1 of 3)	1578212	1580345	2134	-	CIL1025S0120
scaffold77126	1734876	1734915	40	strongHypo	-0.272	1.39e-09	Distal Intergenic	1723089	1726558	3470	-	CIL1025S0138
scaffold77126	1736587	1736616	30	strongHyper	0.183	0.0039	Distal Intergenic	1723089	1726558	3470	-	CIL1025S0138
scaffold77126	1737710	1737738	29	strongHyper	0.208	7.88e-08	Distal Intergenic	1742464	1748821	6358	-	CIL1025S0139
scaffold77126	1771061	1771071	11	strongHyper	0.248	5.18e-07	Intron (CIL1025S0141.mRNA/CIL1025S0141, intron 8 of 9)	1764498	1772874	8377	-	CIL1025S0141
scaffold77126	1870920	1870997	78	strongHyper	0.249	5.11e-06	Distal Intergenic	1926191	1928994	2804	-	CIL1025S0148
scaffold77126	1872431	1872473	43	strongHyper	0.35	2.01e-05	Distal Intergenic	1926191	1928994	2804	-	CIL1025S0148
scaffold77126	1888713	1888816	104	strongHypo	-0.196	0.00196	Distal Intergenic	1926191	1928994	2804	-	CIL1025S0148
scaffold77126	2041518	2041536	19	strongHyper	0.286	1.44e-08	Distal Intergenic	2018506	2022202	3697	-	CIL1025S0156
scaffold77237	44101	44176	76	strongHypo	-0.267	1.17e-08	Distal Intergenic	63281	65001	1721	+	CIL1028S0003
scaffold77237	286999	287084	86	strongHypo	-0.322	4.6e-10	Distal Intergenic	285508	286543	1036	+	CIL1028S0013
scaffold77237	350466	350547	82	strongHypo	-0.183	1.71e-05	Distal Intergenic	364293	365846	1554	+	CIL1028S0020
scaffold77237	426700	426714	15	strongHypo	-0.199	0.007	Distal Intergenic	429262	434388	5127	-	CIL1028S0027
scaffold77237	521066	521421	356	strongHypo	-0.169	2.82e-09	Intron (CIL1028S0030.mRNA/CIL1028S0030, intron 4 of 6)	518819	527351	8533	+	CIL1028S0030
scaffold77237	558886	559057	172	strongHyper	0.179	0.000288	Distal Intergenic	548884	549391	508	+	CIL1028S0033
scaffold77237	834557	834719	163	strongHyper	0.239	5.09e-07	Distal Intergenic	938704	943980	5277	-	CIL1028S0045
scaffold77237	941007	941027	21	strongHyper	0.17	2.78e-06	Intron (CIL1028S0045.mRNA/CIL1028S0045, intron 1 of 2)	938704	943980	5277	-	CIL1028S0045
scaffold77237	1071580	1071819	240	strongHyper	0.157	6.22e-07	Distal Intergenic	1048682	1050070	1389	-	CIL1028S0055
scaffold77237	1136841	1136882	42	strongHypo	-0.343	1.12e-05	Intron (CIL1028S0057.mRNA/CIL1028S0057, intron 7 of 9)	1114802	1141627	26826	-	CIL1028S0057
scaffold77237	1137321	1137486	166	strongHyper	0.377	2.69e-10	Exon (CIL1028S0057.mRNA/CIL1028S0057, exon 3 of 10)	1114802	1141627	26826	-	CIL1028S0057
scaffold77237	1337078	1337088	11	strongHyper	0.191	0.000255	Distal Intergenic	1338989	1343703	4715	-	CIL1028S0063
scaffold77237	1404828	1405146	319	strongHypo	-0.114	0.000114	Promoter (<=1kb)	1405358	1410249	4892	+	CIL1028S0073
scaffold77237	1537386	1537539	154	strongHypo	-0.12	0.00331	Distal Intergenic	1527354	1529643	2290	+	CIL1028S0084
scaffold77237	1555700	1555957	258	strongHypo	-0.112	0.0205	Distal Intergenic	1544359	1551897	7539	-	CIL1028S0085
scaffold77348	20800	21036	237	strongHypo	-0.111	1.49e-05	Distal Intergenic	5902	6105	204	-	CIL1029S0001
scaffold77348	35067	35095	29	strongHyper	0.412	2.59e-05	Distal Intergenic	38007	40606	2600	-	CIL1029S0004
scaffold77348	80497	80772	276	strongHyper	0.123	0.00157	Distal Intergenic	83610	83936	327	-	CIL1029S0011
scaffold77348	169595	169629	35	strongHyper	0.322	1.25e-05	Distal Intergenic	169876	171480	1605	-	CIL1029S0019
scaffold77348	348541	348632	92	strongHypo	-0.181	6.92e-06	Promoter (<=1kb)	338215	348149	9935	-	CIL1029S0037
scaffold77348	368495	368587	93	strongHypo	-0.371	8.03e-25	Promoter (1-2kb)	369554	371281	1728	+	CIL1029S0039
scaffold77348	428030	428138	109	strongHypo	-0.244	4.64e-07	Promoter (1-2kb)	425569	426596	1028	-	CIL1029S0045
scaffold77348	437267	437400	134	strongHypo	-0.126	1.28e-05	Promoter (<=1kb)	436435	436752	318	-	CIL1029S0046
scaffold77348	491287	491336	50	strongHypo	-0.239	0.000198	Distal Intergenic	501923	507457	5535	+	CIL1029S0050
scaffold77348	595145	595169	25	strongHypo	-0.33	1.27e-07	Distal Intergenic	518002	522548	4547	-	CIL1029S0052
scaffold77348	653173	653325	153	strongHypo	-0.107	0.00281	Distal Intergenic	678528	679219	692	-	CIL1029S0058
scaffold77348	811832	811905	74	strongHyper	0.205	1.01e-08	Distal Intergenic	761528	763583	2056	+	CIL1029S0062
scaffold77348	967010	967113	104	strongHypo	-0.396	3.62e-08	Promoter (<=1kb)	960986	966366	5381	-	CIL1029S0068
scaffold77348	1097166	1097322	157	strongHyper	0.259	4.46e-18	Intron (CIL1029S0076.mRNA/CIL1029S0076, intron 6 of 7)	1093180	1098464	5285	+	CIL1029S0076
scaffold77348	1111465	1111647	183	strongHypo	-0.143	0.00043	Distal Intergenic	1093180	1098464	5285	+	CIL1029S0076
scaffold77348	1212620	1212772	153	strongHypo	-0.117	7.91e-08	Distal Intergenic	1268044	1268572	529	-	CIL1029S0082
scaffold77348	1307453	1307524	72	strongHypo	-0.107	0.0429	Intron (CIL1029S0084.mRNA/CIL1029S0084, intron 5 of 9)	1268710	1268967	258	-	CIL1029S0083
scaffold77459	42188	42252	65	strongHyper	0.114	0.00133	Distal Intergenic	100857	101881	1025	-	CIL1030S0004
scaffold77459	93565	93602	38	strongHypo	-0.173	0.00032	Distal Intergenic	100857	101881	1025	-	CIL1030S0004
scaffold77459	204797	204811	15	strongHyper	0.197	1.25e-05	Distal Intergenic	212211	223807	11597	+	CIL1030S0016
scaffold77459	275414	275550	137	strongHyper	0.297	2.13e-24	Intron (CIL1030S0025.mRNA/CIL1030S0025, intron 8 of 10)	281173	302960	21788	+	CIL1030S0026
scaffold77459	474348	474520	173	strongHypo	-0.141	1.92e-11	Exon (CIL1030S0048.mRNA/CIL1030S0048, exon 2 of 6)	470795	477076	6282	-	CIL1030S0048
scaffold77459	479807	479829	23	strongHyper	0.174	8.11e-13	Intron (CIL1030S0049.mRNA/CIL1030S0049, intron 5 of 10)	477323	485045	7723	+	CIL1030S0049
scaffold77459	480940	481429	490	strongHyper	0.102	2.17e-06	Intron (CIL1030S0049.mRNA/CIL1030S0049, intron 5 of 10)	477323	485045	7723	+	CIL1030S0049
scaffold77459	601110	601247	138	strongHypo	-0.174	1.14e-09	Distal Intergenic	596159	598160	2002	+	CIL1030S0067
scaffold77459	697322	697364	43	strongHypo	-0.187	2.5e-05	Distal Intergenic	669753	695473	25721	+	CIL1030S0068
scaffold77459	782802	782954	153	strongHypo	-0.25	0.00134	Distal Intergenic	839734	846606	6873	-	CIL1030S0070
scaffold77459	844684	844738	55	strongHyper	0.152	1.07e-07	Intron (CIL1030S0070.mRNA/CIL1030S0070, intron 2 of 2)	839734	846606	6873	-	CIL1030S0070
scaffold77459	845073	845364	292	strongHypo	-0.217	2.17e-08	Intron (CIL1030S0070.mRNA/CIL1030S0070, intron 2 of 2)	839734	846606	6873	-	CIL1030S0070
scaffold77459	950510	950819	310	strongHypo	-0.166	3.44e-06	Distal Intergenic	946858	949505	2648	+	CIL1030S0076
scaffold77459	1010500	1010717	218	strongHypo	-0.202	2.58e-11	Distal Intergenic	1013986	1016557	2572	-	CIL1030S0082
scaffold77459	1018987	1019031	45	strongHypo	-0.229	4.03e-06	Promoter (2-3kb)	1013986	1016557	2572	-	CIL1030S0082
scaffold77459	1037238	1037278	41	strongHypo	-0.211	3.14e-11	Distal Intergenic	1043821	1054453	10633	+	CIL1030S0085
scaffold77459	1123704	1123880	177	strongHyper	0.285	3.12e-09	Distal Intergenic	1124025	1126176	2152	-	CIL1030S0091
scaffold77459	1236436	1236733	298	strongHypo	-0.117	8.1e-07	Intron (CIL1030S0096.mRNA/CIL1030S0096, intron 2 of 6)	1233910	1239954	6045	+	CIL1030S0096
scaffold77459	1259708	1259764	57	strongHypo	-0.23	0.00521	Exon (CIL1030S0099.mRNA/CIL1030S0099, exon 1 of 1)	1258936	1259923	988	-	CIL1030S0099
scaffold77459	1304828	1305005	178	strongHypo	-0.185	7.91e-06	Promoter (2-3kb)	1301609	1302932	1324	-	CIL1030S0103
scaffold77459	1421294	1421357	64	strongHyper	0.282	5.24e-07	Distal Intergenic	1449845	1473288	23444	+	CIL1030S0108
scaffold77459	1425189	1425882	694	strongHyper	0.117	6.78e-11	Distal Intergenic	1449845	1473288	23444	+	CIL1030S0108
scaffold77459	1451139	1451273	135	strongHyper	0.158	4.89e-05	Intron (CIL1030S0108.mRNA/CIL1030S0108, intron 1 of 22)	1449845	1473288	23444	+	CIL1030S0108
scaffold77459	1452305	1452342	38	strongHypo	-0.212	1.69e-12	Intron (CIL1030S0108.mRNA/CIL1030S0108, intron 1 of 22)	1449845	1473288	23444	+	CIL1030S0108
scaffold77459	1465726	1465746	21	strongHyper	0.279	2.73e-08	Intron (CIL1030S0108.mRNA/CIL1030S0108, intron 9 of 22)	1474587	1478120	3534	+	CIL1030S0109
scaffold77459	1743207	1743241	35	strongHyper	0.146	0.00617	Distal Intergenic	1753394	1762115	8722	+	CIL1030S0130
scaffold77459	1744289	1744443	155	strongHyper	0.139	2.1e-05	Distal Intergenic	1753394	1762115	8722	+	CIL1030S0130
scaffold77459	1754850	1755026	177	strongHypo	-0.215	1.17e-10	Exon (CIL1030S0130.mRNA/CIL1030S0130, exon 3 of 20)	1753394	1762115	8722	+	CIL1030S0130
scaffold77459	1908581	1908798	218	strongHypo	-0.105	0.000639	Intron (CIL1030S0147.mRNA/CIL1030S0147, intron 6 of 7)	1904509	1910784	6276	-	CIL1030S0147
scaffold77459	1926305	1926315	11	strongHyper	0.193	1.04e-05	Exon (CIL1030S0150.mRNA/CIL1030S0150, exon 8 of 20)	1922556	1928347	5792	-	CIL1030S0150
scaffold77570	67202	67386	185	strongHyper	0.112	0.000859	Distal Intergenic	73154	77478	4325	+	CIL1031S0009
scaffold77570	386445	386477	33	strongHyper	0.204	1.71e-06	Distal Intergenic	384490	385245	756	+	CIL1031S0049
[truncated: 881 more rows]

## Sheet: CHH
Table S2 DMRs and DMGs in CHH context
Information of DMRs								Information of DMGs
chromosome	start	end	width	meth direction	methDif	p	annotation	geneStart	geneEnd	geneLength	geneStrand	geneId
scaffold68792	21590	21679	90	strongHypo	-0.125	1.65e-11	Distal Intergenic	32233	34132	1900	-	CIL0893S0001
scaffold68792	35937	35960	24	strongHyper	0.189	8.74e-05	Distal Intergenic	37092	37514	423	-	CIL0893S0002
scaffold68792	66095	66287	193	strongHypo	-0.141	6.53e-18	Distal Intergenic	63724	64716	993	+	CIL0893S0008
scaffold68792	91436	91444	9	strongHyper	0.403	2.28e-05	Promoter (2-3kb)	93888	100533	6646	+	CIL0893S0013
scaffold68792	91625	91839	215	strongHypo	-0.135	7.27e-10	Promoter (2-3kb)	93888	100533	6646	+	CIL0893S0013
scaffold68792	101399	101745	347	strongHyper	0.127	5.52e-31	Distal Intergenic	109010	113463	4454	+	CIL0893S0014
scaffold68792	108183	108339	157	strongHypo	-0.102	2.25e-11	Promoter (<=1kb)	109010	113463	4454	+	CIL0893S0014
scaffold68792	110158	110172	15	strongHyper	0.225	7.18e-07	Intron (CIL0893S0014.mRNA/CIL0893S0014, intron 2 of 9)	109010	113463	4454	+	CIL0893S0014
scaffold68792	162520	162530	11	strongHyper	0.123	0.0243	Intron (CIL0893S0017.mRNA/CIL0893S0017, intron 9 of 15)	148273	167444	19172	-	CIL0893S0017
scaffold68792	182367	182409	43	strongHyper	0.245	1.2e-05	Intron (CIL0893S0018.mRNA/CIL0893S0018, intron 4 of 6)	176334	184502	8169	-	CIL0893S0018
scaffold68792	182432	182542	111	strongHyper	0.123	1.91e-10	Intron (CIL0893S0018.mRNA/CIL0893S0018, intron 4 of 6)	176334	184502	8169	-	CIL0893S0018
scaffold68792	216279	216320	42	strongHyper	0.152	0.000589	Intron (CIL0893S0024.mRNA/CIL0893S0024, intron 5 of 6)	211898	217354	5457	+	CIL0893S0024
scaffold68792	220213	220240	28	strongHypo	-0.104	0.000629	Promoter (2-3kb)	222796	225814	3019	+	CIL0893S0025
scaffold68792	233028	233094	67	strongHyper	0.108	8.26e-10	Promoter (2-3kb)	235658	238233	2576	+	CIL0893S0027
scaffold68792	233597	233629	33	strongHyper	0.109	7.31e-05	Promoter (2-3kb)	235658	238233	2576	+	CIL0893S0027
scaffold68792	263897	263912	16	strongHyper	0.322	5.88e-08	Intron (CIL0893S0032.mRNA/CIL0893S0032, intron 1 of 2)	262521	266877	4357	-	CIL0893S0032
scaffold68792	270326	270356	31	strongHyper	0.195	1.57e-07	Distal Intergenic	267947	269949	2003	+	CIL0893S0033
scaffold68792	271420	271497	78	strongHyper	0.216	7.04e-10	Distal Intergenic	267947	269949	2003	+	CIL0893S0033
scaffold68792	282693	282905	213	strongHypo	-0.126	1.93e-22	Distal Intergenic	272436	279754	7319	-	CIL0893S0034
scaffold68792	289654	289821	168	strongHyper	0.128	7.46e-06	Distal Intergenic	287500	288542	1043	+	CIL0893S0036
scaffold68792	310641	310710	70	strongHypo	-0.118	0.000188	Promoter (1-2kb)	311982	315180	3199	+	CIL0893S0039
scaffold68792	385110	385213	104	strongHypo	-0.101	0.000234	Promoter (<=1kb)	385468	387558	2091	+	CIL0893S0051
scaffold68792	398925	399091	167	strongHyper	0.102	1.64e-09	Distal Intergenic	393758	397667	3910	+	CIL0893S0053
scaffold68792	422935	422964	30	strongHypo	-0.173	0.00102	Distal Intergenic	431928	433589	1662	+	CIL0893S0055
scaffold68792	434577	434625	49	strongHyper	0.122	2.84e-05	Distal Intergenic	431928	433589	1662	+	CIL0893S0055
scaffold68792	450342	450350	9	strongHyper	0.275	2.18e-05	Distal Intergenic	444653	446362	1710	-	CIL0893S0056
scaffold68792	450770	450794	25	strongHypo	-0.159	0.000735	Distal Intergenic	444653	446362	1710	-	CIL0893S0056
scaffold68792	457374	457405	32	strongHyper	0.103	4.2e-05	Distal Intergenic	459394	461136	1743	-	CIL0893S0057
scaffold68792	485226	485333	108	strongHypo	-0.14	1.38e-10	Distal Intergenic	489712	493318	3607	+	CIL0893S0060
scaffold68792	486030	486054	25	strongHypo	-0.21	2.66e-09	Distal Intergenic	489712	493318	3607	+	CIL0893S0060
scaffold68792	488503	488531	29	strongHypo	-0.136	0.000283	Promoter (1-2kb)	489712	493318	3607	+	CIL0893S0060
scaffold68792	531923	531969	47	strongHypo	-0.175	4.34e-05	Promoter (1-2kb)	522600	530830	8231	-	CIL0893S0064
scaffold68792	540367	540422	56	strongHyper	0.13	2.19e-12	Distal Intergenic	541884	544097	2214	-	CIL0893S0065
scaffold68792	588369	588432	64	strongHypo	-0.152	1.67e-15	Intron (CIL0893S0070.mRNA/CIL0893S0070, intron 3 of 9)	586195	590808	4614	-	CIL0893S0070
scaffold68792	593907	594097	191	strongHyper	0.107	2.03e-13	Distal Intergenic	586195	590808	4614	-	CIL0893S0070
scaffold68792	623923	624136	214	strongHyper	0.133	6.94e-13	Distal Intergenic	605033	606922	1890	-	CIL0893S0072
scaffold68792	625150	625193	44	strongHyper	0.124	0.00024	Distal Intergenic	605033	606922	1890	-	CIL0893S0072
scaffold68792	635072	635184	113	strongHyper	0.1	7.76e-05	Distal Intergenic	605033	606922	1890	-	CIL0893S0072
scaffold68792	660179	660194	16	strongHyper	0.108	0.000227	Distal Intergenic	677591	683312	5722	-	CIL0893S0073
scaffold68792	694826	694891	66	strongHyper	0.145	1.71e-07	Distal Intergenic	688054	688281	228	+	CIL0893S0074
scaffold68792	700449	700473	25	strongHyper	0.116	0.000651	Distal Intergenic	709348	710203	856	+	CIL0893S0075
scaffold68792	702524	702535	12	strongHyper	0.176	4.63e-05	Distal Intergenic	709348	710203	856	+	CIL0893S0075
scaffold68792	730270	730289	20	strongHyper	0.257	7.24e-06	Distal Intergenic	734320	734763	444	-	CIL0893S0078
scaffold68792	733109	733122	14	strongHypo	-0.355	7.38e-14	Distal Intergenic	734320	734763	444	-	CIL0893S0078
scaffold68792	741337	741362	26	strongHyper	0.167	4.03e-06	Distal Intergenic	734320	734763	444	-	CIL0893S0078
scaffold68792	749165	749199	35	strongHypo	-0.185	6.16e-06	Distal Intergenic	734320	734763	444	-	CIL0893S0078
scaffold68792	751847	751881	35	strongHypo	-0.208	1.16e-07	Distal Intergenic	734320	734763	444	-	CIL0893S0078
scaffold68792	772005	772076	72	strongHypo	-0.137	0.000737	Distal Intergenic	776561	778081	1521	-	CIL0893S0081
scaffold68792	775783	775859	77	strongHyper	0.127	0.00221	Distal Intergenic	776561	778081	1521	-	CIL0893S0081
scaffold68792	783929	783992	64	strongHyper	0.114	3.11e-06	Promoter (1-2kb)	781060	782020	961	-	CIL0893S0082
scaffold68792	785070	785123	54	strongHyper	0.157	3.23e-08	Promoter (1-2kb)	787068	792075	5008	+	CIL0893S0083
scaffold68792	786099	786372	274	strongHyper	0.112	0.000563	Promoter (<=1kb)	787068	792075	5008	+	CIL0893S0083
scaffold68792	798299	798377	79	strongHypo	-0.177	1.09e-06	Distal Intergenic	798983	802046	3064	-	CIL0893S0084
scaffold68792	820638	820735	98	strongHyper	0.12	3.96e-08	Intron (CIL0893S0088.mRNA/CIL0893S0088, intron 1 of 1)	816085	821177	5093	-	CIL0893S0088
scaffold68792	826649	826806	158	strongHyper	0.113	1.25e-07	Intron (CIL0893S0091.mRNA/CIL0893S0091, intron 1 of 4)	825820	833197	7378	+	CIL0893S0091
scaffold68792	827493	827513	21	strongHypo	-0.175	3.09e-10	Intron (CIL0893S0091.mRNA/CIL0893S0091, intron 1 of 4)	825820	833197	7378	+	CIL0893S0091
scaffold68792	844931	844946	16	strongHyper	0.172	0.000209	Distal Intergenic	845441	846972	1532	-	CIL0893S0094
scaffold68792	890072	890178	107	strongHyper	0.163	1.38e-05	Promoter (<=1kb)	882939	889302	6364	-	CIL0893S0101
scaffold68792	890636	890657	22	strongHypo	-0.244	0.000141	Promoter (1-2kb)	882939	889302	6364	-	CIL0893S0101
scaffold68792	907656	907791	136	strongHyper	0.105	0.00124	Promoter (1-2kb)	909323	910214	892	+	CIL0893S0105
scaffold68792	923333	923349	17	strongHypo	-0.163	4.72e-08	Intron (CIL0893S0107.mRNA/CIL0893S0107, intron 1 of 6)	921684	926462	4779	+	CIL0893S0107
scaffold68792	929059	929155	97	strongHypo	-0.122	1.36e-10	Promoter (1-2kb)	930135	933081	2947	+	CIL0893S0108
scaffold68792	929797	929801	5	strongHypo	-0.332	1.77e-07	Promoter (<=1kb)	930135	933081	2947	+	CIL0893S0108
scaffold68792	943618	943633	16	strongHyper	0.327	5.09e-05	Promoter (<=1kb)	939927	943378	3452	-	CIL0893S0109
scaffold68792	944901	944919	19	strongHypo	-0.251	7.87e-07	Promoter (1-2kb)	939927	943378	3452	-	CIL0893S0109
scaffold68792	958021	958051	31	strongHypo	-0.133	6.01e-08	Promoter (2-3kb)	949655	955101	5447	-	CIL0893S0111
scaffold68792	958515	958595	81	strongHyper	0.11	9.8e-08	Distal Intergenic	949655	955101	5447	-	CIL0893S0111
scaffold68792	974976	974997	22	strongHypo	-0.219	2.31e-08	Distal Intergenic	972798	973454	657	+	CIL0893S0114
scaffold68792	984233	984277	45	strongHyper	0.148	1.61e-07	Promoter (1-2kb)	980677	983136	2460	-	CIL0893S0115
scaffold68792	984804	984810	7	strongHyper	0.176	1.45e-06	Promoter (1-2kb)	980677	983136	2460	-	CIL0893S0115
scaffold68792	994413	994431	19	strongHypo	-0.184	2.12e-06	Intron (CIL0893S0116.mRNA/CIL0893S0116, intron 3 of 4)	990765	995674	4910	-	CIL0893S0116
scaffold68792	1018069	1018170	102	strongHypo	-0.111	0.0163	Promoter (<=1kb)	1018464	1022886	4423	+	CIL0893S0120
scaffold68792	1080487	1080524	38	strongHypo	-0.133	0.000145	Distal Intergenic	1072697	1077327	4631	-	CIL0893S0126
scaffold68792	1083498	1083520	23	strongHypo	-0.249	7.45e-13	Distal Intergenic	1086897	1089705	2809	+	CIL0893S0128
scaffold68792	1083823	1083909	87	strongHypo	-0.112	1.12e-06	Distal Intergenic	1086897	1089705	2809	+	CIL0893S0128
scaffold68792	1101988	1102113	126	strongHypo	-0.113	8.75e-15	Promoter (<=1kb)	1096686	1101221	4536	-	CIL0893S0131
scaffold68792	1113108	1113217	110	strongHypo	-0.107	1.77e-14	Distal Intergenic	1106898	1110021	3124	-	CIL0893S0133
scaffold68792	1117705	1117751	47	strongHypo	-0.242	8.32e-15	Distal Intergenic	1121185	1125297	4113	-	CIL0893S0134
scaffold68792	1120483	1120515	33	strongHyper	0.179	1.11e-06	Distal Intergenic	1121185	1125297	4113	-	CIL0893S0134
scaffold68792	1137498	1137535	38	strongHypo	-0.129	1.7e-07	Promoter (1-2kb)	1139451	1141122	1672	+	CIL0893S0136
scaffold68792	1154711	1154773	63	strongHypo	-0.1	5.67e-05	Distal Intergenic	1159084	1160629	1546	+	CIL0893S0139
scaffold68792	1169156	1169224	69	strongHyper	0.103	9.5e-08	Promoter (<=1kb)	1165432	1168696	3265	-	CIL0893S0140
scaffold68792	1173043	1173075	33	strongHyper	0.115	7.17e-10	Intron (CIL0893S0141.mRNA/CIL0893S0141, intron 2 of 3)	1169775	1174450	4676	+	CIL0893S0141
scaffold68792	1187798	1187885	88	strongHypo	-0.101	4.37e-06	Promoter (<=1kb)	1186132	1186898	767	-	CIL0893S0143
scaffold68792	1189457	1189488	32	strongHyper	0.318	5.23e-10	Promoter (<=1kb)	1190411	1193837	3427	+	CIL0893S0144
scaffold68792	1194470	1194543	74	strongHypo	-0.107	1.63e-11	Promoter (<=1kb)	1193099	1193632	534	-	CIL0893S0145
scaffold68792	1230345	1230405	61	strongHypo	-0.266	1.2e-05	Promoter (1-2kb)	1231906	1240337	8432	+	CIL0893S0149
scaffold68792	1314139	1314293	155	strongHypo	-0.213	3.27e-30	Exon (CIL0893S0157.mRNA/CIL0893S0157, exon 2 of 2)	1309363	1314194	4832	+	CIL0893S0157
scaffold68792	1329629	1329656	28	strongHyper	0.16	0.000275	Distal Intergenic	1309363	1314194	4832	+	CIL0893S0157
scaffold68792	1341242	1341297	56	strongHyper	0.21	7.77e-06	Distal Intergenic	1309363	1314194	4832	+	CIL0893S0157
scaffold68792	1350825	1350855	31	strongHyper	0.13	2.04e-05	Distal Intergenic	1378184	1401609	23426	+	CIL0893S0160
scaffold68792	1377832	1377998	167	strongHypo	-0.124	9.48e-11	Promoter (<=1kb)	1378184	1401609	23426	+	CIL0893S0160
scaffold68792	1378878	1379183	306	strongHypo	-0.101	5.06e-06	Intron (CIL0893S0160.mRNA/CIL0893S0160, intron 1 of 3)	1378184	1401609	23426	+	CIL0893S0160
scaffold68792	1379496	1379517	22	strongHyper	0.207	0.000189	Intron (CIL0893S0160.mRNA/CIL0893S0160, intron 1 of 3)	1378184	1401609	23426	+	CIL0893S0160
scaffold68792	1381729	1381795	67	strongHypo	-0.101	6.45e-08	Intron (CIL0893S0160.mRNA/CIL0893S0160, intron 1 of 3)	1378184	1401609	23426	+	CIL0893S0160
scaffold68792	1403209	1403222	14	strongHypo	-0.14	7.19e-05	Distal Intergenic	1378184	1401609	23426	+	CIL0893S0160
scaffold68792	1403603	1403621	19	strongHypo	-0.176	0.00218	Distal Intergenic	1378184	1401609	23426	+	CIL0893S0160
scaffold68792	1416725	1416773	49	strongHypo	-0.117	0.00013	Distal Intergenic	1378184	1401609	23426	+	CIL0893S0160
scaffold68792	1422539	1422654	116	strongHyper	0.138	1.82e-09	Distal Intergenic	1378184	1401609	23426	+	CIL0893S0160
scaffold68792	1423357	1423423	67	strongHyper	0.312	1.05e-05	Distal Intergenic	1378184	1401609	23426	+	CIL0893S0160
scaffold68792	1425694	1425776	83	strongHyper	0.117	3.16e-09	Distal Intergenic	1378184	1401609	23426	+	CIL0893S0160
scaffold68792	1452019	1452182	164	strongHyper	0.172	1.04e-10	Distal Intergenic	1480691	1480879	189	+	CIL0893S0163
scaffold68792	1452815	1452852	38	strongHyper	0.147	0.000319	Distal Intergenic	1480691	1480879	189	+	CIL0893S0163
scaffold68792	1472914	1472928	15	strongHypo	-0.176	4.79e-05	Distal Intergenic	1480691	1480879	189	+	CIL0893S0163
scaffold68792	1482134	1482215	82	strongHyper	0.165	3.56e-05	Distal Intergenic	1480691	1480879	189	+	CIL0893S0163
scaffold68792	1495372	1495390	19	strongHyper	0.146	2.05e-09	Distal Intergenic	1489132	1491057	1926	-	CIL0893S0164
scaffold68792	1495522	1495537	16	strongHypo	-0.139	1.09e-07	Distal Intergenic	1489132	1491057	1926	-	CIL0893S0164
scaffold68792	1495553	1495558	6	strongHyper	0.131	0.000119	Distal Intergenic	1489132	1491057	1926	-	CIL0893S0164
scaffold68792	1496263	1496270	8	strongHyper	0.373	5.64e-07	Distal Intergenic	1489132	1491057	1926	-	CIL0893S0164
scaffold68792	1512179	1512226	48	strongHyper	0.178	2.36e-10	Distal Intergenic	1489132	1491057	1926	-	CIL0893S0164
scaffold68792	1519342	1519407	66	strongHypo	-0.121	0.000141	Distal Intergenic	1489132	1491057	1926	-	CIL0893S0164
scaffold68792	1523729	1523874	146	strongHypo	-0.114	8.84e-08	Distal Intergenic	1489132	1491057	1926	-	CIL0893S0164
scaffold68792	1533275	1533334	60	strongHypo	-0.129	3.46e-05	Distal Intergenic	1557038	1565676	8639	+	CIL0893S0165
scaffold68792	1537395	1537429	35	strongHypo	-0.182	0.000279	Distal Intergenic	1557038	1565676	8639	+	CIL0893S0165
scaffold68792	1575947	1575955	9	strongHyper	0.173	0.000242	Distal Intergenic	1557038	1565676	8639	+	CIL0893S0165
scaffold68792	1577895	1577935	41	strongHyper	0.215	1.01e-06	Distal Intergenic	1557038	1565676	8639	+	CIL0893S0165
scaffold68792	1585365	1585378	14	strongHyper	0.255	0.000504	Distal Intergenic	1557038	1565676	8639	+	CIL0893S0165
scaffold68792	1629002	1629015	14	strongHypo	-0.146	5.75e-07	Distal Intergenic	1622503	1625203	2701	+	CIL0893S0168
scaffold68792	1636160	1636181	22	strongHypo	-0.114	3.05e-05	Distal Intergenic	1622503	1625203	2701	+	CIL0893S0168
scaffold68792	1636707	1636713	7	strongHypo	-0.28	1.16e-05	Distal Intergenic	1622503	1625203	2701	+	CIL0893S0168
scaffold68792	1639180	1639218	39	strongHypo	-0.161	2.32e-07	Distal Intergenic	1622503	1625203	2701	+	CIL0893S0168
scaffold68792	1642052	1642077	26	strongHyper	0.299	3.81e-08	Distal Intergenic	1622503	1625203	2701	+	CIL0893S0168
scaffold68792	1646090	1646179	90	strongHypo	-0.106	1.05e-12	Distal Intergenic	1622503	1625203	2701	+	CIL0893S0168
scaffold68792	1671562	1671570	9	strongHypo	-0.276	9.43e-05	Promoter (1-2kb)	1665406	1670321	4916	-	CIL0893S0169
scaffold68792	1672120	1672317	198	strongHyper	0.109	2.14e-14	Promoter (1-2kb)	1665406	1670321	4916	-	CIL0893S0169
scaffold68792	1673656	1673696	41	strongHyper	0.182	1.27e-06	Distal Intergenic	1665406	1670321	4916	-	CIL0893S0169
scaffold68792	1674868	1674891	24	strongHypo	-0.113	0.00283	Distal Intergenic	1665406	1670321	4916	-	CIL0893S0169
scaffold68792	1712880	1712891	12	strongHyper	0.269	1.74e-05	Distal Intergenic	1715080	1716349	1270	-	CIL0893S0170
scaffold68792	1722253	1722268	16	strongHyper	0.201	5.46e-05	Distal Intergenic	1715080	1716349	1270	-	CIL0893S0170
scaffold68792	1724174	1724188	15	strongHypo	-0.146	9.74e-06	Distal Intergenic	1715080	1716349	1270	-	CIL0893S0170
scaffold68792	1733528	1733800	273	strongHypo	-0.199	4.27e-38	Distal Intergenic	1715080	1716349	1270	-	CIL0893S0170
scaffold68792	1739047	1739091	45	strongHypo	-0.178	2e-08	Distal Intergenic	1715080	1716349	1270	-	CIL0893S0170
scaffold68792	1740564	1740587	24	strongHyper	0.162	2.35e-05	Distal Intergenic	1715080	1716349	1270	-	CIL0893S0170
scaffold68792	1800381	1800417	37	strongHypo	-0.11	1.8e-05	Promoter (<=1kb)	1800877	1801258	382	+	CIL0893S0174
scaffold68792	1835985	1836029	45	strongHypo	-0.136	4.85e-10	Distal Intergenic	1837571	1844657	7087	-	CIL0893S0177
scaffold68792	1836304	1836325	22	strongHyper	0.19	8.26e-06	Distal Intergenic	1837571	1844657	7087	-	CIL0893S0177
scaffold68792	1841114	1841126	13	strongHyper	0.263	1.09e-06	Intron (CIL0893S0177.mRNA/CIL0893S0177, intron 6 of 9)	1837571	1844657	7087	-	CIL0893S0177
scaffold68792	1846462	1846549	88	strongHypo	-0.169	5.15e-06	Promoter (1-2kb)	1837571	1844657	7087	-	CIL0893S0177
scaffold68792	1848228	1848260	33	strongHypo	-0.346	9.37e-13	Distal Intergenic	1837571	1844657	7087	-	CIL0893S0177
scaffold68792	1849082	1849092	11	strongHyper	0.217	4.44e-05	Distal Intergenic	1837571	1844657	7087	-	CIL0893S0177
scaffold68792	1857249	1857339	91	strongHyper	0.182	4.63e-11	Distal Intergenic	1837571	1844657	7087	-	CIL0893S0177
scaffold68792	1875307	1875320	14	strongHypo	-0.257	7.33e-06	Distal Intergenic	1882722	1884251	1530	-	CIL0893S0178
scaffold68792	1877621	1877785	165	strongHyper	0.118	4.16e-15	Distal Intergenic	1882722	1884251	1530	-	CIL0893S0178
scaffold68792	1886196	1886204	9	strongHyper	0.255	7.69e-05	Promoter (1-2kb)	1882722	1884251	1530	-	CIL0893S0178
scaffold68792	1888299	1888309	11	strongHyper	0.139	4.84e-05	Distal Intergenic	1882722	1884251	1530	-	CIL0893S0178
scaffold68792	1888645	1888698	54	strongHypo	-0.164	4.74e-06	Distal Intergenic	1882722	1884251	1530	-	CIL0893S0178
scaffold68792	1895685	1895693	9	strongHypo	-0.19	0.00101	Intron (CIL0893S0179.mRNA/CIL0893S0179, intron 8 of 8)	1890616	1896520	5905	-	CIL0893S0179
scaffold68792	1895734	1895919	186	strongHyper	0.191	3.99e-21	Intron (CIL0893S0179.mRNA/CIL0893S0179, intron 8 of 8)	1890616	1896520	5905	-	CIL0893S0179
scaffold68792	1896810	1896997	188	strongHyper	0.1	8.13e-10	Promoter (<=1kb)	1890616	1896520	5905	-	CIL0893S0179
scaffold68792	1898216	1898236	21	strongHyper	0.119	0.000635	Promoter (1-2kb)	1890616	1896520	5905	-	CIL0893S0179
scaffold68792	1949934	1949970	37	strongHyper	0.175	8.99e-06	Promoter (2-3kb)	1937104	1947433	10330	-	CIL0893S0181
scaffold68792	1954242	1954253	12	strongHyper	0.236	5.08e-05	Distal Intergenic	1937104	1947433	10330	-	CIL0893S0181
scaffold68792	1955414	1955424	11	strongHypo	-0.108	0.000765	Distal Intergenic	1937104	1947433	10330	-	CIL0893S0181
scaffold68792	1986239	1986247	9	strongHyper	0.287	9.99e-07	Distal Intergenic	1965467	1979243	13777	-	CIL0893S0182
scaffold68792	1986783	1986831	49	strongHyper	0.112	2.43e-05	Distal Intergenic	1965467	1979243	13777	-	CIL0893S0182
scaffold68792	1987534	1987570	37	strongHypo	-0.141	0.000103	Distal Intergenic	1965467	1979243	13777	-	CIL0893S0182
scaffold68792	1990061	1990083	23	strongHyper	0.116	6.11e-05	Distal Intergenic	1965467	1979243	13777	-	CIL0893S0182
scaffold68792	1991656	1991746	91	strongHypo	-0.127	1.09e-05	Distal Intergenic	1965467	1979243	13777	-	CIL0893S0182
scaffold68792	1995678	1995715	38	strongHypo	-0.169	1.72e-07	Distal Intergenic	1965467	1979243	13777	-	CIL0893S0182
scaffold68792	1998942	1998952	11	strongHyper	0.236	8.55e-06	Distal Intergenic	1965467	1979243	13777	-	CIL0893S0182
scaffold68792	2031108	2031135	28	strongHypo	-0.124	1.3e-05	Distal Intergenic	2036618	2063196	26579	+	CIL0893S0183
scaffold68792	2031673	2031808	136	strongHypo	-0.113	2.37e-10	Distal Intergenic	2036618	2063196	26579	+	CIL0893S0183
scaffold68792	2032504	2032522	19	strongHypo	-0.102	9.35e-05	Distal Intergenic	2036618	2063196	26579	+	CIL0893S0183
scaffold68792	2032695	2032735	41	strongHyper	0.139	0.00111	Distal Intergenic	2036618	2063196	26579	+	CIL0893S0183
scaffold68792	2048010	2048074	65	strongHypo	-0.101	0.00109	Intron (CIL0893S0183.mRNA/CIL0893S0183, intron 5 of 18)	2036618	2063196	26579	+	CIL0893S0183
scaffold68792	2081398	2081501	104	strongHyper	0.102	1.01e-05	Distal Intergenic	2083078	2090400	7323	-	CIL0893S0186
scaffold68792	2091582	2091817	236	strongHypo	-0.113	4.29e-09	Promoter (1-2kb)	2083078	2090400	7323	-	CIL0893S0186
scaffold68792	2094235	2094398	164	strongHypo	-0.102	2.18e-08	Distal Intergenic	2083078	2090400	7323	-	CIL0893S0186
scaffold68792	2095600	2095760	161	strongHypo	-0.117	4.54e-12	Distal Intergenic	2083078	2090400	7323	-	CIL0893S0186
scaffold68792	2101314	2101412	99	strongHypo	-0.143	2.15e-07	Distal Intergenic	2083078	2090400	7323	-	CIL0893S0186
scaffold68792	2108854	2108890	37	strongHyper	0.161	3.63e-06	Distal Intergenic	2083078	2090400	7323	-	CIL0893S0186
scaffold68792	2127218	2127250	33	strongHypo	-0.132	2.2e-06	Distal Intergenic	2146340	2150461	4122	+	CIL0893S0188
scaffold68792	2128000	2128056	57	strongHypo	-0.118	4.63e-06	Distal Intergenic	2146340	2150461	4122	+	CIL0893S0188
scaffold68792	2203395	2203443	49	strongHyper	0.145	2.28e-05	Intron (CIL0893S0192.mRNA/CIL0893S0192, intron 3 of 22)	2201498	2212288	10791	+	CIL0893S0192
scaffold68792	2223887	2223907	21	strongHypo	-0.305	5.26e-06	Distal Intergenic	2230795	2232914	2120	+	CIL0893S0193
scaffold68792	2227114	2227245	132	strongHypo	-0.103	0.00261	Distal Intergenic	2230795	2232914	2120	+	CIL0893S0193
scaffold68792	2229879	2229889	11	strongHypo	-0.202	2.11e-06	Promoter (<=1kb)	2230795	2232914	2120	+	CIL0893S0193
scaffold68792	2237843	2237867	25	strongHyper	0.161	0.00101	Distal Intergenic	2233828	2237354	3527	+	CIL0893S0194
scaffold68792	2252676	2252684	9	strongHyper	0.374	2.63e-05	Distal Intergenic	2263477	2264644	1168	+	CIL0893S0197
scaffold68792	2254241	2254365	125	strongHyper	0.109	1.01e-08	Distal Intergenic	2263477	2264644	1168	+	CIL0893S0197
scaffold68792	2262120	2262132	13	strongHyper	0.156	0.014	Promoter (1-2kb)	2263477	2264644	1168	+	CIL0893S0197
scaffold68792	2297063	2297077	15	strongHypo	-0.203	1.14e-06	Distal Intergenic	2300320	2305754	5435	+	CIL0893S0198
scaffold68792	2306558	2306632	75	strongHyper	0.109	0.000237	Distal Intergenic	2300320	2305754	5435	+	CIL0893S0198
scaffold68792	2348644	2348754	111	strongHypo	-0.107	2.2e-06	Distal Intergenic	2349692	2351607	1916	-	CIL0893S0199
scaffold68792	2348798	2348817	20	strongHyper	0.197	8.3e-08	Distal Intergenic	2349692	2351607	1916	-	CIL0893S0199
scaffold68792	2353764	2353906	143	strongHyper	0.119	2e-07	Promoter (2-3kb)	2349692	2351607	1916	-	CIL0893S0199
scaffold68792	2374553	2374569	17	strongHypo	-0.178	0.00108	Intron (CIL0893S0203.mRNA/CIL0893S0203, intron 6 of 51)	2364591	2366691	2101	-	CIL0893S0202
scaffold68792	2427086	2427366	281	strongHypo	-0.133	1.76e-07	Intron (CIL0893S0205.mRNA/CIL0893S0205, intron 1 of 17)	2425855	2437947	12093	+	CIL0893S0205
scaffold68792	2427827	2427864	38	strongHypo	-0.198	7.94e-10	Intron (CIL0893S0205.mRNA/CIL0893S0205, intron 1 of 17)	2425855	2437947	12093	+	CIL0893S0205
scaffold68792	2449131	2449176	46	strongHyper	0.251	5.67e-17	Promoter (<=1kb)	2440703	2448829	8127	-	CIL0893S0207
scaffold68792	2472435	2472470	36	strongHypo	-0.229	1.46e-08	Distal Intergenic	2467023	2469920	2898	+	CIL0893S0209
scaffold68792	2473264	2473666	403	strongHyper	0.102	9.02e-21	Distal Intergenic	2467023	2469920	2898	+	CIL0893S0209
scaffold68792	2476328	2476352	25	strongHyper	0.159	0.000196	Distal Intergenic	2481696	2495949	14254	+	CIL0893S0210
scaffold68792	2478942	2478973	32	strongHypo	-0.164	8.9e-06	Promoter (2-3kb)	2481696	2495949	14254	+	CIL0893S0210
scaffold68792	2483123	2483141	19	strongHyper	0.104	3.74e-05	Intron (CIL0893S0210.mRNA/CIL0893S0210, intron 1 of 6)	2481696	2495949	14254	+	CIL0893S0210
scaffold68792	2562027	2562058	32	strongHypo	-0.164	1.34e-10	Intron (CIL0893S0221.mRNA/CIL0893S0221, intron 8 of 9)	2558742	2563223	4482	+	CIL0893S0221
scaffold68792	2567488	2567558	71	strongHyper	0.341	1.09e-22	Promoter (<=1kb)	2564346	2567157	2812	-	CIL0893S0222
scaffold68792	2568783	2568830	48	strongHyper	0.164	9.36e-09	Promoter (1-2kb)	2564346	2567157	2812	-	CIL0893S0222
scaffold68792	2569854	2569936	83	strongHypo	-0.234	1.98e-06	Promoter (2-3kb)	2564346	2567157	2812	-	CIL0893S0222
scaffold68792	2577726	2577798	73	strongHyper	0.194	1.41e-06	Promoter (2-3kb)	2570449	2574894	4446	-	CIL0893S0223
scaffold68792	2589347	2589359	13	strongHyper	0.187	7.25e-07	Distal Intergenic	2596735	2598465	1731	+	CIL0893S0225
scaffold68792	2595952	2595993	42	strongHyper	0.136	2.29e-05	Promoter (<=1kb)	2596735	2598465	1731	+	CIL0893S0225
scaffold68792	2602875	2602997	123	strongHyper	0.136	5.23e-07	Intron (CIL0893S0226.mRNA/CIL0893S0226, intron 1 of 1)	2600098	2604229	4132	-	CIL0893S0226
scaffold68792	2607384	2607443	60	strongHypo	-0.135	9.95e-06	Distal Intergenic	2600098	2604229	4132	-	CIL0893S0226
scaffold68792	2607767	2607794	28	strongHypo	-0.193	4.55e-06	Distal Intergenic	2600098	2604229	4132	-	CIL0893S0226
scaffold68792	2643785	2643889	105	strongHyper	0.112	1.99e-05	Intron (CIL0893S0228.mRNA/CIL0893S0228, intron 5 of 15)	2628921	2629184	264	+	CIL0893S0227
scaffold68792	2665655	2665668	14	strongHyper	0.246	6.75e-08	Promoter (<=1kb)	2631946	2665454	33509	-	CIL0893S0228
scaffold68792	2668086	2668177	92	strongHyper	0.12	7.77e-07	Promoter (2-3kb)	2631946	2665454	33509	-	CIL0893S0228
scaffold68792	2668815	2668837	23	strongHyper	0.191	0.00237	Distal Intergenic	2631946	2665454	33509	-	CIL0893S0228
scaffold68792	2671180	2671331	152	strongHypo	-0.129	4.56e-07	Distal Intergenic	2631946	2665454	33509	-	CIL0893S0228
scaffold68792	2675994	2676008	15	strongHyper	0.303	6.72e-07	Distal Intergenic	2631946	2665454	33509	-	CIL0893S0228
scaffold68792	2676370	2676387	18	strongHyper	0.233	4.23e-08	Distal Intergenic	2682721	2686622	3902	-	CIL0893S0229
scaffold68792	2676763	2676776	14	strongHypo	-0.169	8.28e-06	Distal Intergenic	2682721	2686622	3902	-	CIL0893S0229
scaffold68792	2676941	2676963	23	strongHyper	0.208	5.13e-08	Distal Intergenic	2682721	2686622	3902	-	CIL0893S0229
scaffold68792	2678390	2678434	45	strongHyper	0.124	7.08e-06	Distal Intergenic	2682721	2686622	3902	-	CIL0893S0229
scaffold68792	2679691	2679720	30	strongHyper	0.114	0.000347	Distal Intergenic	2682721	2686622	3902	-	CIL0893S0229
scaffold68792	2680439	2680631	193	strongHyper	0.118	2.76e-10	Distal Intergenic	2682721	2686622	3902	-	CIL0893S0229
scaffold68792	2681220	2681245	26	strongHypo	-0.13	6.06e-07	Distal Intergenic	2682721	2686622	3902	-	CIL0893S0229
scaffold68792	2688218	2688266	49	strongHypo	-0.254	9.93e-15	Promoter (1-2kb)	2682721	2686622	3902	-	CIL0893S0229
scaffold68792	2718651	2718716	66	strongHyper	0.144	6.39e-06	Distal Intergenic	2723027	2726559	3533	+	CIL0893S0232
scaffold68792	2728108	2728189	82	strongHypo	-0.112	8.1e-06	Promoter (1-2kb)	2729738	2733748	4011	+	CIL0893S0233
scaffold68792	2746012	2746044	33	strongHyper	0.133	4.36e-05	Intron (CIL0893S0235.mRNA/CIL0893S0235, intron 1 of 2)	2745184	2747278	2095	+	CIL0893S0235
scaffold68792	2757367	2757377	11	strongHyper	0.201	2.6e-08	Distal Intergenic	2745184	2747278	2095	+	CIL0893S0235
scaffold68792	2758078	2758134	57	strongHyper	0.106	2.21e-07	Distal Intergenic	2745184	2747278	2095	+	CIL0893S0235
scaffold68792	2758956	2759007	52	strongHyper	0.276	1.99e-11	Distal Intergenic	2745184	2747278	2095	+	CIL0893S0235
scaffold68792	2794009	2794079	71	strongHyper	0.115	0.00204	Distal Intergenic	2794807	2796543	1737	-	CIL0893S0237
scaffold68792	2796752	2796854	103	strongHyper	0.107	1.16e-08	Promoter (<=1kb)	2794807	2796543	1737	-	CIL0893S0237
scaffold68792	2822897	2822970	74	strongHypo	-0.135	0.000115	Distal Intergenic	2815994	2819568	3575	+	CIL0893S0241
scaffold68792	2824504	2824510	7	strongHypo	-0.154	4.35e-05	Distal Intergenic	2815994	2819568	3575	+	CIL0893S0241
scaffold68792	2828832	2828899	68	strongHypo	-0.115	9.76e-06	Distal Intergenic	2815994	2819568	3575	+	CIL0893S0241
scaffold68792	2829456	2829468	13	strongHypo	-0.199	0.0168	Distal Intergenic	2815994	2819568	3575	+	CIL0893S0241
scaffold68792	2842905	2842987	83	strongHyper	0.14	4.06e-06	Distal Intergenic	2852945	2855154	2210	+	CIL0893S0242
scaffold68792	2852063	2852177	115	strongHyper	0.199	2.19e-05	Promoter (<=1kb)	2852945	2855154	2210	+	CIL0893S0242
scaffold68792	2886292	2886299	8	strongHyper	0.333	6.11e-07	Promoter (<=1kb)	2885003	2885359	357	-	CIL0893S0246
scaffold68792	2893372	2893405	34	strongHyper	0.18	1.56e-06	Distal Intergenic	2901330	2904267	2938	+	CIL0893S0248
scaffold68792	2896857	2896875	19	strongHypo	-0.16	1.13e-06	Distal Intergenic	2901330	2904267	2938	+	CIL0893S0248
scaffold68792	2897827	2897845	19	strongHyper	0.197	0.000142	Distal Intergenic	2901330	2904267	2938	+	CIL0893S0248
scaffold68792	2900437	2900476	40	strongHyper	0.171	2.13e-06	Promoter (<=1kb)	2901330	2904267	2938	+	CIL0893S0248
scaffold68792	2902335	2902611	277	strongHypo	-0.109	1.71e-11	Intron (CIL0893S0248.mRNA/CIL0893S0248, intron 1 of 2)	2901330	2904267	2938	+	CIL0893S0248
scaffold68792	2924300	2924341	42	strongHypo	-0.134	7.62e-08	Distal Intergenic	2911292	2915863	4572	-	CIL0893S0250
scaffold68792	2925107	2925155	49	strongHypo	-0.145	2.76e-10	Distal Intergenic	2933033	2933447	415	-	CIL0893S0252
scaffold68792	2927435	2927574	140	strongHyper	0.138	6.75e-10	Distal Intergenic	2933033	2933447	415	-	CIL0893S0252
scaffold68792	2928022	2928035	14	strongHyper	0.24	7e-08	Distal Intergenic	2933033	2933447	415	-	CIL0893S0252
scaffold68792	2929471	2929567	97	strongHypo	-0.123	3.5e-05	Distal Intergenic	2933033	2933447	415	-	CIL0893S0252
scaffold68792	2937683	2937760	78	strongHypo	-0.104	1.2e-08	Distal Intergenic	2934388	2935152	765	+	CIL0893S0253
scaffold68792	2938957	2938969	13	strongHyper	0.172	0.000103	Distal Intergenic	2941055	2941792	738	-	CIL0893S0254
scaffold68792	2945693	2945704	12	strongHypo	-0.259	2.29e-07	Distal Intergenic	2942284	2942855	572	+	CIL0893S0255
scaffold68792	2954765	2954793	29	strongHypo	-0.213	5.08e-07	Distal Intergenic	2964639	2971971	7333	+	CIL0893S0256
scaffold68792	2956331	2956400	70	strongHypo	-0.111	0.000441	Distal Intergenic	2964639	2971971	7333	+	CIL0893S0256
scaffold68792	2957380	2957395	16	strongHypo	-0.176	1.48e-05	Distal Intergenic	2964639	2971971	7333	+	CIL0893S0256
scaffold68792	2957722	2957798	77	strongHyper	0.142	1.05e-07	Distal Intergenic	2964639	2971971	7333	+	CIL0893S0256
scaffold68792	2979391	2979406	16	strongHyper	0.44	1.06e-09	Promoter (1-2kb)	2973871	2977506	3636	-	CIL0893S0258
scaffold68792	2980136	2980852	717	strongHyper	0.108	1.28e-07	Distal Intergenic	2973871	2977506	3636	-	CIL0893S0258
scaffold68792	2992095	2992166	72	strongHyper	0.115	2.8e-06	Distal Intergenic	2996523	3003268	6746	+	CIL0893S0261
scaffold68792	3003415	3003475	61	strongHyper	0.119	0.000649	Distal Intergenic	2996523	3003268	6746	+	CIL0893S0261
scaffold68792	3006279	3006292	14	strongHyper	0.55	2.86e-11	Distal Intergenic	2996523	3003268	6746	+	CIL0893S0261
scaffold68792	3014757	3014841	85	strongHyper	0.177	1.8e-05	Promoter (2-3kb)	3017252	3021046	3795	+	CIL0893S0262
scaffold68792	3027780	3027891	112	strongHypo	-0.181	4.74e-17	Promoter (2-3kb)	3030329	3031062	734	+	CIL0893S0264
scaffold68792	3036778	3036952	175	strongHypo	-0.129	2.39e-06	Distal Intergenic	3030329	3031062	734	+	CIL0893S0264
scaffold68792	3042284	3042311	28	strongHyper	0.212	1.15e-06	Distal Intergenic	3052050	3057134	5085	+	CIL0893S0265
scaffold68792	3047176	3047191	16	strongHyper	0.306	7e-06	Distal Intergenic	3052050	3057134	5085	+	CIL0893S0265
scaffold68792	3048840	3048969	130	strongHyper	0.175	7.13e-11	Distal Intergenic	3052050	3057134	5085	+	CIL0893S0265
scaffold68792	3049031	3049043	13	strongHypo	-0.207	8.17e-07	Distal Intergenic	3052050	3057134	5085	+	CIL0893S0265
scaffold68792	3056438	3056515	78	strongHypo	-0.11	4.51e-08	Intron (CIL0893S0265.mRNA/CIL0893S0265, intron 3 of 3)	3052050	3057134	5085	+	CIL0893S0265
scaffold68792	3078706	3078741	36	strongHyper	0.107	0.000456	Intron (CIL0893S0268.mRNA/CIL0893S0268, intron 1 of 1)	3076441	3083260	6820	+	CIL0893S0268
scaffold68792	3078765	3078824	60	strongHypo	-0.161	0.000376	Intron (CIL0893S0268.mRNA/CIL0893S0268, intron 1 of 1)	3076441	3083260	6820	+	CIL0893S0268
scaffold68792	3093071	3093116	46	strongHyper	0.216	0.000277	Distal Intergenic	3095175	3096072	898	-	CIL0893S0270
scaffold68792	3093130	3093134	5	strongHyper	0.331	3.04e-05	Distal Intergenic	3095175	3096072	898	-	CIL0893S0270
scaffold68792	3093166	3093257	92	strongHyper	0.15	4.72e-09	Distal Intergenic	3095175	3096072	898	-	CIL0893S0270
scaffold68792	3100836	3100851	16	strongHypo	-0.101	0.0078	Distal Intergenic	3095175	3096072	898	-	CIL0893S0270
scaffold68792	3106498	3106850	353	strongHyper	0.1	7.57e-12	Distal Intergenic	3095175	3096072	898	-	CIL0893S0270
scaffold68792	3112692	3112973	282	strongHypo	-0.137	8.11e-14	Distal Intergenic	3122248	3123574	1327	+	CIL0893S0272
scaffold68792	3116669	3116760	92	strongHypo	-0.18	1.16e-14	Distal Intergenic	3122248	3123574	1327	+	CIL0893S0272
scaffold68792	3124224	3124567	344	strongHyper	0.103	1.55e-15	Distal Intergenic	3122248	3123574	1327	+	CIL0893S0272
scaffold68792	3124798	3124895	98	strongHypo	-0.311	3.72e-25	Distal Intergenic	3122248	3123574	1327	+	CIL0893S0272
scaffold68792	3146859	3146894	36	strongHyper	0.131	8.29e-07	Promoter (2-3kb)	3148992	3154099	5108	+	CIL0893S0275
scaffold68792	3157844	3157876	33	strongHypo	-0.151	0.000744	Intron (CIL0893S0276.mRNA/CIL0893S0276, intron 5 of 12)	3155034	3162165	7132	+	CIL0893S0276
scaffold68792	3163055	3163075	21	strongHypo	-0.241	1.05e-05	Distal Intergenic	3164583	3165116	534	-	CIL0893S0277
scaffold68792	3174382	3174418	37	strongHypo	-0.114	8.09e-05	Promoter (<=1kb)	3171241	3174073	2833	-	CIL0893S0279
scaffold68792	3212995	3213030	36	strongHypo	-0.134	0.00124	Promoter (2-3kb)	3204645	3210303	5659	-	CIL0893S0285
scaffold68792	3213923	3213943	21	strongHypo	-0.206	5.94e-06	Distal Intergenic	3204645	3210303	5659	-	CIL0893S0285
scaffold68792	3308976	3309034	59	strongHypo	-0.105	0.00467	Distal Intergenic	3310151	3314321	4171	-	CIL0893S0295
scaffold68792	3315810	3315830	21	strongHypo	-0.216	8.12e-07	Promoter (1-2kb)	3310151	3314321	4171	-	CIL0893S0295
scaffold68792	3317866	3317967	102	strongHyper	0.136	5.16e-06	3' UTR	3317965	3321333	3369	-	CIL0893S0296
scaffold68792	3321893	3321924	32	strongHypo	-0.166	4.95e-07	Promoter (<=1kb)	3317965	3321333	3369	-	CIL0893S0296
scaffold68792	3322759	3323032	274	strongHyper	0.106	2.73e-20	Promoter (1-2kb)	3317965	3321333	3369	-	CIL0893S0296
scaffold68792	3326590	3326672	83	strongHyper	0.177	2.85e-09	Distal Intergenic	3317965	3321333	3369	-	CIL0893S0296
scaffold68792	3328460	3328476	17	strongHypo	-0.231	5.13e-07	Distal Intergenic	3331006	3333111	2106	-	CIL0893S0297
scaffold68792	3335782	3335810	29	strongHyper	0.151	0.0105	Promoter (2-3kb)	3331006	3333111	2106	-	CIL0893S0297
scaffold68792	3342709	3342767	59	strongHypo	-0.173	1.03e-10	Distal Intergenic	3350687	3352264	1578	+	CIL0893S0298
scaffold68792	3342912	3343255	344	strongHyper	0.102	1.21e-16	Distal Intergenic	3350687	3352264	1578	+	CIL0893S0298
scaffold68792	3346466	3346545	80	strongHypo	-0.114	0.000856	Distal Intergenic	3350687	3352264	1578	+	CIL0893S0298
scaffold68792	3346883	3346899	17	strongHyper	0.218	6.15e-05	Distal Intergenic	3350687	3352264	1578	+	CIL0893S0298
scaffold68792	3362879	3362899	21	strongHypo	-0.29	4.8e-10	Distal Intergenic	3366294	3369947	3654	-	CIL0893S0300
scaffold68792	3363415	3363425	11	strongHyper	0.125	3.27e-05	Distal Intergenic	3366294	3369947	3654	-	CIL0893S0300
[truncated: 15,508 more rows]
