# Supplementary material
Source: MDPI journal article supplement (https://www.mdpi.com/1999-4907/14/1/4)
Supplement: s1 [file s1 › Table S3 GO enrichment analysis of DMGs.xlsx]

## Sheet: CG
Table S3 GO enrichment analysis of DMGs in CG context (p < 0.05)
GO ID	Gene Ontology	Gene term	p-value of Fisher's exact test	Genes
GO:0000819	Biological Process	sister chromatid segregation	0.002244	CIL1006S0103;CIL0976S0101
GO:0010104	Biological Process	regulation of ethylene-activated signaling pathway	0.0044059	CIL0893S0432;CIL0925S0114
GO:0030001	Biological Process	metal ion transport	0.00800687	CIL1100S0049;CIL0921S0028;CIL0893S0306;CIL0921S0034;CIL0957S0048;CIL1060S0114;CIL1167S0074
GO:0046916	Biological Process	cellular transition metal ion homeostasis	0.0101532	CIL1167S0074;CIL1060S0114;CIL0921S0028;CIL0921S0034;CIL0893S0306
GO:0009793	Biological Process	embryo development ending in seed dormancy	0.0122414	CIL0908S0050;CIL0976S0111;CIL0992S0012;CIL1092S0109;CIL0919S0160;CIL1023S0054;CIL0978S0138
GO:0016558	Biological Process	protein import into peroxisome matrix	0.0145935	CIL1009S0124;CIL1064S0104
GO:0005992	Biological Process	trehalose biosynthetic process	0.0192556	CIL1068S0031;CIL1084S0034;CIL0940S0150
GO:0016311	Biological Process	dephosphorylation	0.0236608	CIL0929S0023;CIL0940S0150;CIL1066S0075;CIL1068S0031;CIL1023S0054;CIL0982S0002;CIL1093S0029;CIL1127S0044
GO:0006526	Biological Process	arginine biosynthetic process	0.0296061	CIL0976S0021;CIL1030S0061
GO:0019722	Biological Process	calcium-mediated signaling	0.0296061	CIL1104S0036;CIL0962S0150
GO:0071423	Biological Process	malate transmembrane transport	0.0355341	CIL0906S0052;CIL0906S0056
GO:0006635	Biological Process	fatty acid beta-oxidation	0.0418754	CIL1009S0124;CIL1064S0104
GO:0009695	Biological Process	jasmonic acid biosynthetic process	0.0486028	CIL1105S0008;CIL0895S0079
GO:0005737	Cellular Component	cytoplasm	0.00612769	CIL1032S0059;CIL1023S0025;CIL0935S0081;CIL1018S0005;CIL0906S0002;CIL1087S0018;CIL0967S0209;CIL1167S0074;CIL0974S0056;CIL1040S0085;CIL0919S0214;CIL0978S0138;CIL0921S0028;CIL0976S0021;CIL0946S0005;CIL1012S0087;CIL0990S0183;CIL1047S0030;CIL0945S0098;CIL1002S0056;CIL1063S0054;CIL0893S0306;CIL0919S0121;CIL1064S0078;CIL1038S0138;CIL0929S0051;CIL1060S0114;CIL1009S0034;CIL1050S0010;CIL0951S0179;CIL1064S0…
GO:0033180	Cellular Component	proton-transporting V-type ATPase, V1 domain	0.00676554	CIL1002S0113;CIL1034S0046
GO:0000145	Cellular Component	exocyst	0.0234226	CIL1001S0070;CIL1012S0069;CIL0962S0027;CIL1034S0014
GO:0030176	Cellular Component	integral component of endoplasmic reticulum membrane	0.0334659	CIL1001S0078;CIL1001S0035
GO:0046914	Molecular Function	transition metal ion binding	0.00273491	CIL0893S0306;CIL1087S0018;CIL0921S0034;CIL0921S0028;CIL1060S0114;CIL1167S0074
GO:0046983	Molecular Function	protein dimerization activity	0.00386623	CIL0897S0016;CIL0970S0071;CIL1093S0112;CIL0945S0059;CIL0945S0086;CIL0979S0158;CIL0897S0099;CIL1021S0005;CIL0917S0017;CIL1090S0060;CIL0976S0021;CIL1031S0153
GO:0004713	Molecular Function	protein tyrosine kinase activity	0.00748902	CIL0993S0026;CIL1099S0019;CIL0948S0149
GO:0047077	Molecular Function	Photinus-luciferin 4-monooxygenase (ATP-hydrolyzing) activity	0.0106604	CIL1105S0008;CIL0937S0156
GO:0051536	Molecular Function	iron-sulfur cluster binding	0.0139523	CIL1093S0108;CIL1167S0034;CIL1075S0085;CIL1012S0053
GO:0047911	Molecular Function	galacturan 1,4-alpha-galacturonidase activity	0.0242157	CIL1075S0065;CIL1047S0145
GO:0003825	Molecular Function	alpha,alpha-trehalose-phosphate synthase (UDP-forming) activity	0.0242157	CIL1068S0031;CIL1084S0034
GO:0050662	Molecular Function	coenzyme binding	0.0250158	CIL1030S0032;CIL0967S0062;CIL0979S0116;CIL0908S0039;CIL1006S0019
GO:0004069	Molecular Function	L-aspartate:2-oxoglutarate aminotransferase activity	0.0297223	CIL1060S0031;CIL1090S0056
GO:0080130	Molecular Function	L-phenylalanine:2-oxoglutarate aminotransferase activity	0.035672	CIL1060S0031;CIL1090S0056
GO:0020037	Molecular Function	heme binding	0.0393204	CIL0899S0137;CIL1066S0082;CIL1102S0095;CIL1051S0017;CIL0945S0123;CIL0970S0098;CIL0923S0010;CIL0893S0072;CIL0979S0064;CIL0923S0247;CIL1012S0087;CIL1029S0062;CIL1043S0082;CIL0895S0023;CIL0957S0066

## Sheet: CHG
Table S3 GO enrichment analysis of DMGs in CHG context (p < 0.05)
GO ID	Gene Ontology	Gene term	p-value of Fisher's exact test	Genes
GO:0006606	Biological Process	protein import into nucleus	0.000478259	CIL1030S0049;CIL1021S0025;CIL1030S0048;CIL0909S0172;CIL1167S0013;CIL0998S0035;CIL1003S0087;CIL0993S0034
GO:0017148	Biological Process	negative regulation of translation	0.00112882	CIL0893S0228;CIL0935S0083;CIL0919S0066;CIL0996S0012
GO:0019745	Biological Process	pentacyclic triterpenoid biosynthetic process	0.00112882	CIL1025S0004;CIL0921S0113;CIL1025S0008;CIL0996S0048
GO:0000972	Biological Process	transcription-dependent tethering of RNA polymerase II gene DNA at nuclear periphery	0.00114097	CIL1030S0049;CIL0998S0035;CIL1167S0013
GO:0031145	Biological Process	anaphase-promoting complex-dependent catabolic process	0.00270993	CIL0929S0187;CIL0929S0051;CIL0893S0183
GO:0051607	Biological Process	defense response to virus	0.00448871	CIL0914S0013;CIL1028S0020
GO:0036092	Biological Process	phosphatidylinositol-3-phosphate biosynthetic process	0.00515009	CIL1031S0158;CIL1001S0044;CIL1060S0013
GO:0040029	Biological Process	regulation of gene expression, epigenetic	0.00515009	CIL0982S0009;CIL0909S0029;CIL1006S0004
GO:0090304	Biological Process	nucleic acid metabolic process	0.00706096	CIL1034S0028;CIL0970S0019;CIL1105S0029;CIL1141S0018;CIL0912S0061
GO:0006405	Biological Process	RNA export from nucleus	0.00856563	CIL1030S0049;CIL0998S0035;CIL1167S0013
GO:0030071	Biological Process	regulation of mitotic metaphase/anaphase transition	0.00856563	CIL0893S0183;CIL0929S0187;CIL0929S0051
GO:0016311	Biological Process	dephosphorylation	0.0100202	CIL0893S0182;CIL1025S0139;CIL1093S0033;CIL1066S0075;CIL1068S0031;CIL0938S0092;CIL0897S0120;CIL1127S0044;CIL1023S0093;CIL0893S0265;CIL1075S0090;CIL0909S0051;CIL0893S0409;CIL0923S0066;CIL1047S0031;CIL1001S0027
GO:0016458	Biological Process	gene silencing	0.0128655	CIL1006S0004;CIL0938S0135
GO:0010375	Biological Process	stomatal complex patterning	0.0128655	CIL0914S0013;CIL1051S0040
GO:0009234	Biological Process	menaquinone biosynthetic process	0.0128655	CIL1068S0035;CIL1068S0036
GO:0006352	Biological Process	DNA-templated transcription, initiation	0.0163602	CIL0893S0073;CIL0895S0012;CIL1034S0087;CIL1114S0029;CIL1034S0083
GO:0048608	Biological Process	reproductive structure development	0.0185794	CIL0942S0037;CIL0912S0061;CIL0970S0019
GO:0007094	Biological Process	mitotic spindle assembly checkpoint	0.0185794	CIL1118S0020;CIL0914S0005;CIL0972S0069
GO:0061025	Biological Process	membrane fusion	0.0190721	CIL1060S0019;CIL1006S0086;CIL1084S0015;CIL0945S0149
GO:0000462	Biological Process	maturation of SSU-rRNA from tricistronic rRNA transcript (SSU-rRNA, 5.8S rRNA, LSU-rRNA)	0.0231306	CIL1061S0014;CIL1061S0011;CIL0922S0254;CIL0909S0027;CIL0998S0018
GO:0006513	Biological Process	protein monoubiquitination	0.0245901	CIL1009S0124;CIL1114S0028
GO:0000712	Biological Process	resolution of meiotic recombination intermediates	0.0245901	CIL1048S0048;CIL1012S0074
GO:0006596	Biological Process	polyamine biosynthetic process	0.02524	CIL1114S0025;CIL1050S0016;CIL0906S0176
GO:0006623	Biological Process	protein targeting to vacuole	0.0288319	CIL0979S0026;CIL0906S0096;CIL0940S0035;CIL0908S0181
GO:0000288	Biological Process	nuclear-transcribed mRNA catabolic process, deadenylation-dependent decay	0.0330091	CIL0996S0012;CIL0919S0066;CIL0893S0228
GO:0043967	Biological Process	histone H4 acetylation	0.0391769	CIL0945S0040;CIL0951S0089
GO:0010189	Biological Process	vitamin E biosynthetic process	0.0391769	CIL0895S0185;CIL0895S0037
GO:0006308	Biological Process	DNA catabolic process	0.0391769	CIL0897S0130;CIL0897S0129
GO:0009653	Biological Process	anatomical structure morphogenesis	0.0391769	CIL0970S0019;CIL0912S0061
GO:0010190	Biological Process	cytochrome b6f complex assembly	0.0391769	CIL1030S0085;CIL1009S0013
GO:0044702	Biological Process	single organism reproductive process	0.0391769	CIL0912S0061;CIL0970S0019
GO:0006537	Biological Process	glutamate biosynthetic process	0.0391769	CIL1050S0010;CIL0914S0051
GO:0007005	Biological Process	mitochondrion organization	0.0391769	CIL1087S0034;CIL0945S0061
GO:0045324	Biological Process	late endosome to vacuole transport	0.0391769	CIL0912S0012;CIL0979S0026
GO:0006013	Biological Process	mannose metabolic process	0.0391769	CIL0974S0094;CIL1051S0042
GO:1902559	Biological Process	3'-phospho-5'-adenylyl sulfate transmembrane transport	0.0391769	CIL0992S0082;CIL0957S0138
GO:0045944	Biological Process	positive regulation of transcription from RNA polymerase II promoter	0.0410708	CIL0951S0099;CIL0908S0180;CIL1034S0045;CIL1029S0068
GO:0009791	Biological Process	post-embryonic development	0.0410708	CIL0942S0037;CIL0970S0019;CIL0979S0023;CIL0912S0061
GO:0010197	Biological Process	polar nucleus fusion	0.0418696	CIL0998S0018;CIL0908S0152;CIL0998S0033
GO:0005992	Biological Process	trehalose biosynthetic process	0.0481335	CIL0893S0265;CIL1068S0031;CIL1025S0139;CIL0923S0066
GO:0030015	Cellular Component	CCR4-NOT core complex	0.000281127	CIL0996S0012;CIL0919S0066;CIL0893S0228
GO:0005779	Cellular Component	integral component of peroxisomal membrane	0.00805564	CIL1009S0124;CIL0957S0146;CIL1114S0028
GO:0030176	Cellular Component	integral component of endoplasmic reticulum membrane	0.0311815	CIL0957S0138;CIL0940S0009;CIL0992S0082
GO:0090575	Cellular Component	RNA polymerase II transcription factor complex	0.0395944	CIL1096S0081;CIL0893S0399;CIL0938S0090
GO:0017119	Cellular Component	Golgi transport complex	0.0395944	CIL1055S0094;CIL1009S0134;CIL1034S0054
GO:0000932	Cellular Component	P-body	0.043567	CIL0996S0012;CIL0935S0146;CIL0919S0066;CIL0893S0228;CIL0909S0029
GO:0009506	Cellular Component	plasmodesma	0.0446961	CIL1092S0011;CIL0899S0009;CIL0967S0199;CIL0914S0154;CIL1028S0020;CIL0953S0101;CIL0917S0008;CIL0897S0141;CIL0895S0064;CIL0935S0139;CIL0978S0058;CIL0935S0146;CIL0989S0003;CIL0922S0122;CIL0902S0010;CIL0979S0103;CIL1084S0033;CIL1055S0119;CIL0945S0149;CIL1012S0109;CIL0895S0070;CIL1141S0013;CIL1029S0082;CIL1075S0049;CIL1001S0047;CIL0957S0096;CIL0948S0082;CIL0998S0035
GO:0005737	Cellular Component	cytoplasm	0.0475282	CIL1025S0138;CIL0976S0046;CIL0921S0001;CIL0906S0004;CIL0935S0083;CIL1087S0036;CIL0998S0014;CIL1040S0007;CIL1064S0066;CIL1006S0127;CIL0935S0081;CIL1018S0005;CIL1102S0021;CIL0906S0002;CIL0914S0068;CIL1087S0018;CIL1003S0128;CIL0967S0209;CIL1167S0074;CIL0923S0234;CIL0974S0056;CIL0987S0126;CIL1063S0083;CIL0974S0083;CIL0940S0197;CIL1040S0085;CIL1092S0080;CIL1114S0025;CIL0897S0120;CIL0978S0138;CIL0978S0…
GO:0042299	Molecular Function	lupeol synthase activity	0.00010068	CIL0921S0113;CIL1025S0008;CIL0996S0048;CIL1025S0004
GO:0045735	Molecular Function	nutrient reservoir activity	0.00349044	CIL0996S0055;CIL0976S0020;CIL1030S0099;CIL0893S0078;CIL1093S0044;CIL1001S0077;CIL0938S0015;CIL0897S0050
GO:0008531	Molecular Function	riboflavin kinase activity	0.00462227	CIL0893S0182;CIL0921S0040
GO:0008935	Molecular Function	1,4-dihydroxy-2-naphthoyl-CoA synthase activity	0.00462227	CIL1068S0036;CIL1068S0035
GO:0044822	Molecular Function	RNA binding	0.00585748	CIL0996S0086;CIL0906S0002;CIL0909S0079;CIL0938S0084;CIL1084S0033
GO:0047372	Molecular Function	acylglycerol lipase activity	0.00677282	CIL0925S0120;CIL0925S0117;CIL0895S0211;CIL1037S0034
GO:0005319	Molecular Function	lipid transporter activity	0.00892405	CIL1048S0070;CIL0984S0017;CIL0908S0123
GO:0004766	Molecular Function	spermidine synthase activity	0.00892405	CIL0906S0176;CIL1050S0016;CIL1114S0025
GO:0015079	Molecular Function	potassium ion transmembrane transporter activity	0.0192466	CIL1002S0085;CIL1141S0008;CIL1099S0095;CIL1099S0090;CIL1002S0083;CIL1099S0094
GO:0004004	Molecular Function	ATP-dependent RNA helicase activity	0.0194179	CIL0979S0023;CIL0987S0006;CIL0906S0002;CIL0909S0079;CIL0940S0006;CIL0938S0084;CIL1084S0033
GO:0017025	Molecular Function	TBP-class protein binding	0.0200319	CIL1034S0083;CIL1034S0087;CIL0951S0084;CIL0948S0187
GO:0016787	Molecular Function	hydrolase activity	0.024423	CIL1023S0012;CIL1025S0112;CIL0998S0014;CIL1034S0051;CIL1023S0095;CIL0976S0148;CIL0897S0100;CIL1068S0085;CIL0990S0045;CIL0893S0205;CIL0917S0037;CIL0897S0086;CIL0951S0115;CIL0967S0206;CIL1100S0110;CIL1105S0053;CIL1075S0009;CIL1099S0019;CIL0987S0154;CIL0938S0069;CIL0948S0147;CIL1043S0078;CIL0921S0040;CIL0987S0005;CIL1003S0047;CIL1040S0032;CIL1064S0069;CIL0987S0031;CIL0929S0194;CIL1132S0008;CIL0909S0…
GO:0003684	Molecular Function	damaged DNA binding	0.0244833	CIL1012S0074;CIL0992S0081;CIL0970S0125;CIL1003S0091;CIL0912S0034
GO:0004805	Molecular Function	trehalose-phosphatase activity	0.0248178	CIL0893S0265;CIL1068S0031;CIL0923S0066;CIL1025S0139
GO:0004042	Molecular Function	acetyl-CoA:L-glutamate N-acetyltransferase activity	0.0252868	CIL1084S0092;CIL1092S0080
GO:0003779	Molecular Function	actin binding	0.0285632	CIL0945S0046;CIL0945S0115;CIL0945S0114;CIL0923S0234;CIL0953S0012;CIL0912S0059;CIL1038S0135;CIL1047S0104
GO:0004519	Molecular Function	endonuclease activity	0.0332734	CIL0897S0130;CIL1038S0131;CIL0897S0129;CIL0940S0192;CIL1002S0012
GO:0043015	Molecular Function	gamma-tubulin binding	0.0342862	CIL0893S0205;CIL0990S0032;CIL1087S0089
GO:0003924	Molecular Function	GTPase activity	0.0346251	CIL0893S0365;CIL0970S0068;CIL0948S0148;CIL1087S0034;CIL1102S0022;CIL1038S0138;CIL0922S0246;CIL0912S0015;CIL0974S0003;CIL0945S0061;CIL1040S0085;CIL0895S0173;CIL1132S0062;CIL0940S0203;CIL0990S0183
GO:0008061	Molecular Function	chitin binding	0.0370846	CIL0921S0079;CIL0990S0016;CIL0990S0015;CIL0935S0024;CIL0935S0025;CIL0912S0082
GO:0004559	Molecular Function	alpha-mannosidase activity	0.0402595	CIL0974S0094;CIL1051S0042
GO:0046912	Molecular Function	transferase activity, transferring acyl groups, acyl groups converted into alkyl on transfer	0.0402595	CIL0993S0024;CIL0914S0049
GO:0046964	Molecular Function	3'-phosphoadenosine 5'-phosphosulfate transmembrane transporter activity	0.0402595	CIL0957S0138;CIL0992S0082
GO:0031072	Molecular Function	heat shock protein binding	0.0430024	CIL0982S0122;CIL1092S0116;CIL0957S0174;CIL1018S0001
GO:0004620	Molecular Function	phospholipase activity	0.0434574	CIL0925S0120;CIL1037S0034;CIL0925S0117

## Sheet: CHH
Table S3 GO enrichment analysis of DMGs in CHH context (p < 0.05)
GO ID	Gene Ontology	Gene term	p-value of Fisher's exact test	Genes
GO:0002943	Biological Process	tRNA dihydrouridine synthesis	0.00189641	CIL0919S0175;CIL1037S0089;CIL1038S0043;CIL0919S0174;CIL0979S0167
GO:0016998	Biological Process	cell wall macromolecule catabolic process	0.00503249	CIL0974S0090;CIL1003S0126;CIL0912S0082;CIL1051S0060;CIL0935S0025;CIL0935S0024;CIL0935S0031;CIL0970S0039;CIL0935S0027;CIL1105S0016;CIL0912S0083
GO:0006952	Biological Process	defense response	0.00644211	CIL1029S0085;CIL1031S0060;CIL1141S0035;CIL1028S0001;CIL1029S0082;CIL0990S0058;CIL0914S0154;CIL0897S0047;CIL0945S0147;CIL0940S0038;CIL0948S0163;CIL1020S0003;CIL1099S0025;CIL0895S0064;CIL0940S0021;CIL1084S0011;CIL0990S0062;CIL1167S0022;CIL1012S0103;CIL1050S0078;CIL1020S0128;CIL0893S0363;CIL1012S0109;CIL0948S0161;CIL0990S0060;CIL0990S0053;CIL1006S0056;CIL0974S0024;CIL0990S0063;CIL1009S0101;CIL0990S0…
GO:0006596	Biological Process	polyamine biosynthetic process	0.00764859	CIL0940S0104;CIL1114S0025;CIL1050S0016;CIL0906S0176;CIL0914S0054;CIL0899S0026
GO:0030154	Biological Process	cell differentiation	0.00795275	CIL1066S0092;CIL0925S0060;CIL0919S0135;CIL0902S0160;CIL0893S0225;CIL1009S0042;CIL1043S0041;CIL0946S0125;CIL0948S0043;CIL1029S0068
GO:0015748	Biological Process	organophosphate ester transport	0.0085755	CIL0893S0232;CIL0982S0130;CIL1064S0026;CIL0937S0161;CIL1047S0014;CIL0970S0100;CIL0921S0023
GO:0015716	Biological Process	organic phosphonate transport	0.0085755	CIL0921S0023;CIL0970S0100;CIL1047S0014;CIL0937S0161;CIL1064S0026;CIL0982S0130;CIL0893S0232
GO:0010047	Biological Process	fruit dehiscence	0.00890363	CIL0906S0006;CIL0902S0104;CIL1018S0083
GO:0006434	Biological Process	seryl-tRNA aminoacylation	0.00890363	CIL1055S0034;CIL1087S0036;CIL0909S0163
GO:0048544	Biological Process	recognition of pollen	0.0103576	CIL1029S0083;CIL0895S0064;CIL0987S0068;CIL1021S0038;CIL0895S0068;CIL0945S0080;CIL0895S0123;CIL0914S0155;CIL0895S0100;CIL0895S0070;CIL1012S0001
GO:0002181	Biological Process	cytoplasmic translation	0.012133	CIL1104S0056;CIL0908S0064;CIL0899S0167;CIL0948S0033;CIL1020S0020;CIL1068S0069;CIL1009S0121;CIL0914S0025;CIL1020S0096;CIL1093S0015;CIL0906S0097;CIL1075S0066;CIL1068S0070;CIL0996S0086;CIL0992S0025;CIL0902S0067
GO:0044210	Biological Process	'de novo' CTP biosynthetic process	0.0121644	CIL0993S0041;CIL0993S0017;CIL0906S0123;CIL0906S0124;CIL0914S0002
GO:0051017	Biological Process	actin filament bundle assembly	0.0121644	CIL1034S0074;CIL0953S0012;CIL0899S0136;CIL0937S0094;CIL1051S0026
GO:0019745	Biological Process	pentacyclic triterpenoid biosynthetic process	0.0121644	CIL1025S0004;CIL0921S0113;CIL1025S0008;CIL0996S0048;CIL0996S0051
GO:0045944	Biological Process	positive regulation of transcription from RNA polymerase II promoter	0.0126018	CIL0951S0099;CIL0908S0180;CIL0899S0162;CIL1034S0045;CIL1040S0084;CIL0902S0160;CIL1029S0068;CIL0948S0025;CIL0917S0084
GO:0016311	Biological Process	dephosphorylation	0.01333	CIL1099S0096;CIL0982S0081;CIL0893S0182;CIL1009S0070;CIL0942S0205;CIL1025S0139;CIL1018S0047;CIL0945S0045;CIL1003S0102;CIL0929S0023;CIL0940S0150;CIL1006S0066;CIL1093S0033;CIL1023S0038;CIL1068S0031;CIL0919S0129;CIL1023S0054;CIL1020S0062;CIL1061S0096;CIL1093S0029;CIL0938S0092;CIL0897S0120;CIL0993S0076;CIL1090S0025;CIL0948S0205;CIL1003S0146;CIL1127S0044;CIL0993S0077;CIL1055S0019;CIL0906S0081;CIL0893S0…
GO:0015995	Biological Process	chlorophyll biosynthetic process	0.0135494	CIL1018S0050;CIL1018S0064;CIL0897S0015;CIL1034S0072;CIL0938S0087;CIL0987S0151;CIL0935S0041;CIL0893S0331
GO:0006338	Biological Process	chromatin remodeling	0.0135494	CIL1050S0049;CIL1030S0084;CIL0962S0023;CIL0945S0040;CIL1099S0017;CIL0989S0066;CIL1032S0056;CIL1090S0087
GO:0030042	Biological Process	actin filament depolymerization	0.0135494	CIL0990S0122;CIL0923S0234;CIL0978S0103;CIL0996S0063;CIL1084S0086;CIL1032S0054;CIL1038S0103;CIL0917S0059
GO:0031408	Biological Process	oxylipin biosynthetic process	0.0180691	CIL1055S0047;CIL1055S0048;CIL1038S0109;CIL0917S0011;CIL0895S0150;CIL1034S0026;CIL0895S0079;CIL1061S0087;CIL1104S0053
GO:0034475	Biological Process	U4 snRNA 3'-end processing	0.0192897	CIL0951S0135;CIL0938S0098;CIL0914S0107;CIL0902S0132
GO:0040029	Biological Process	regulation of gene expression, epigenetic	0.0192897	CIL0982S0009;CIL1043S0042;CIL0909S0029;CIL1006S0004
GO:0034427	Biological Process	nuclear-transcribed mRNA catabolic process, exonucleolytic, 3'-5'	0.0192897	CIL0914S0107;CIL0938S0098;CIL0951S0135;CIL0902S0132
GO:0006351	Biological Process	transcription, DNA-templated	0.0240548	CIL0923S0130;CIL1040S0055;CIL0967S0033;CIL0893S0378;CIL0902S0043;CIL1047S0041;CIL1031S0006;CIL1066S0019;CIL1100S0071;CIL0923S0123;CIL1089S0050;CIL0921S0069;CIL1006S0039;CIL1002S0077;CIL1031S0027;CIL0897S0159;CIL1034S0041;CIL0912S0158;CIL0940S0118;CIL1102S0014;CIL0909S0198;CIL0990S0040;CIL0929S0104;CIL0914S0140;CIL0982S0078;CIL0976S0025;CIL1064S0031;CIL0937S0057;CIL1012S0146;CIL0992S0035;CIL0987S0…
GO:0000972	Biological Process	transcription-dependent tethering of RNA polymerase II gene DNA at nuclear periphery	0.0300813	CIL1030S0049;CIL0998S0035;CIL1167S0013
GO:0071051	Biological Process	polyadenylation-dependent snoRNA 3'-end processing	0.0300813	CIL0938S0098;CIL0914S0107;CIL0951S0135
GO:0071028	Biological Process	nuclear mRNA surveillance	0.0300813	CIL0914S0107;CIL0951S0135;CIL0902S0132
GO:0009607	Biological Process	response to biotic stimulus	0.0301922	CIL0893S0363;CIL0990S0058;CIL0990S0060;CIL0948S0161;CIL0945S0147;CIL0897S0047;CIL0948S0163;CIL0990S0053;CIL0990S0063;CIL0990S0057;CIL1167S0022;CIL0990S0062;CIL1092S0047
GO:0009737	Biological Process	response to abscisic acid	0.0318312	CIL1048S0048;CIL1021S0110;CIL1118S0058;CIL0906S0049;CIL1020S0042;CIL0893S0205;CIL0923S0018;CIL1018S0083;CIL0919S0135;CIL0906S0006;CIL0919S0116;CIL1050S0068;CIL0895S0011;CIL1032S0044;CIL0982S0147;CIL1037S0036;CIL0899S0176;CIL0987S0005;CIL0940S0046;CIL1132S0048;CIL0922S0193;CIL0935S0124;CIL1061S0073
GO:0010087	Biological Process	phloem or xylem histogenesis	0.0338001	CIL1075S0092;CIL0951S0028;CIL0938S0110;CIL1076S0091;CIL1032S0001;CIL1076S0043;CIL1021S0110;CIL0893S0279;CIL1020S0042
GO:0006368	Biological Process	transcription elongation from RNA polymerase II promoter	0.0353305	CIL0906S0167;CIL0976S0051;CIL0979S0057;CIL0909S0090;CIL0906S0170;CIL0976S0053
GO:0006405	Biological Process	RNA export from nucleus	0.0376772	CIL1030S0049;CIL0998S0035;CIL1167S0015;CIL1167S0013
GO:0008356	Biological Process	asymmetric cell division	0.0376772	CIL0917S0155;CIL1092S0088;CIL1028S0015;CIL0899S0094
GO:0016560	Biological Process	protein import into peroxisome matrix, docking	0.0376772	CIL0935S0148;CIL1118S0006;CIL1037S0030;CIL0938S0101
GO:0071577	Biological Process	zinc II ion transmembrane transport	0.0380366	CIL0974S0038;CIL0923S0272;CIL1037S0104;CIL1071S0069;CIL1099S0050;CIL1071S0049;CIL1071S0071;CIL1071S0050;CIL0893S0262;CIL1071S0052
GO:0016485	Biological Process	protein processing	0.0413453	CIL0906S0146;CIL0935S0148;CIL1034S0070;CIL1032S0111;CIL0909S0001;CIL0923S0146;CIL0951S0104;CIL0899S0009;CIL1118S0006;CIL1093S0037;CIL0906S0017
GO:0031998	Biological Process	regulation of fatty acid beta-oxidation	0.0429696	CIL0937S0112;CIL0979S0178
GO:0006127	Biological Process	glycerophosphate shuttle	0.0429696	CIL0957S0125;CIL0967S0004
GO:0010192	Biological Process	mucilage biosynthetic process	0.0429696	CIL1003S0109;CIL0908S0046
GO:1902184	Biological Process	negative regulation of shoot apical meristem development	0.0429696	CIL0914S0111;CIL0917S0158
GO:0048359	Biological Process	mucilage metabolic process involved in seed coat development	0.0429696	CIL0908S0046;CIL1003S0109
GO:0010201	Biological Process	response to continuous far red light stimulus by the high-irradiance response system	0.0429696	CIL1060S0015;CIL0935S0083
GO:0031125	Biological Process	rRNA 3'-end processing	0.0429696	CIL0951S0135;CIL0914S0107
GO:0051176	Biological Process	positive regulation of sulfur metabolic process	0.0429696	CIL0978S0169;CIL0914S0116
GO:0010466	Biological Process	negative regulation of peptidase activity	0.0429696	CIL0946S0030;CIL0908S0012
GO:0010033	Biological Process	response to organic substance	0.0429696	CIL0908S0192;CIL1051S0021
GO:0080093	Biological Process	regulation of photorespiration	0.0429696	CIL0937S0112;CIL0979S0178
GO:0018343	Biological Process	protein farnesylation	0.0429696	CIL0951S0103;CIL1118S0058
GO:0015994	Biological Process	chlorophyll metabolic process	0.0429696	CIL0942S0144;CIL0895S0185
GO:0016337	Biological Process	single organismal cell-cell adhesion	0.0429696	CIL1020S0042;CIL1021S0110
GO:0016122	Biological Process	xanthophyll metabolic process	0.0429696	CIL0895S0185;CIL0970S0134
GO:0010401	Biological Process	pectic galactan metabolic process	0.0429696	CIL1021S0110;CIL1020S0042
GO:0019673	Biological Process	GDP-mannose metabolic process	0.0429696	CIL0992S0014;CIL0992S0015
GO:0008152	Biological Process	metabolic process	0.0434086	CIL1092S0110;CIL0922S0100;CIL0935S0136;CIL1100S0089;CIL0893S0352;CIL1061S0089;CIL0902S0009;CIL1050S0085;CIL1114S0058;CIL0982S0123;CIL1003S0040;CIL1047S0130;CIL0909S0137;CIL0923S0101;CIL0945S0126;CIL1118S0072;CIL1051S0057;CIL1090S0060;CIL1037S0104;CIL1092S0031;CIL1020S0012;CIL0989S0050;CIL0922S0097;CIL1128S0044;CIL1015S0015;CIL1105S0014;CIL0922S0099;CIL1167S0018;CIL1102S0097;CIL1018S0063;CIL0967S0…
GO:0008360	Biological Process	regulation of cell shape	0.0448578	CIL0895S0186;CIL1012S0021;CIL0899S0156;CIL0951S0103;CIL0899S0175;CIL0987S0126;CIL0982S0043
GO:0031347	Biological Process	regulation of defense response	0.0448578	CIL0951S0146;CIL0895S0185;CIL1068S0042;CIL1030S0029;CIL0917S0154;CIL1118S0053;CIL0940S0046
GO:0098655	Biological Process	cation transmembrane transport	0.0485094	CIL0938S0008;CIL1034S0004;CIL0912S0108;CIL1064S0028;CIL0938S0009;CIL0962S0043;CIL0987S0016;CIL1003S0103;CIL1031S0092;CIL0902S0082
GO:0009733	Biological Process	response to auxin	0.0491333	CIL1034S0059;CIL0978S0034;CIL1090S0087;CIL0953S0078;CIL0937S0107;CIL1031S0091;CIL1018S0029;CIL0948S0237;CIL0897S0103;CIL1025S0090;CIL0902S0183;CIL0902S0119;CIL1118S0018;CIL0992S0031;CIL0893S0105;CIL0902S0120;CIL0992S0030;CIL0948S0241;CIL1001S0051;CIL0893S0285;CIL1038S0047
GO:0070449	Cellular Component	elongin complex	0.000408124	CIL0976S0051;CIL0979S0057;CIL0906S0170;CIL1102S0055;CIL0906S0167;CIL0976S0053
GO:0030015	Cellular Component	CCR4-NOT core complex	0.00841293	CIL0996S0012;CIL0919S0066;CIL0893S0228
GO:0005777	Cellular Component	peroxisome	0.0097403	CIL0893S0209;CIL1075S0009;CIL0919S0087;CIL1068S0036;CIL0998S0080;CIL0922S0093;CIL0984S0082;CIL1075S0007;CIL1075S0005;CIL0967S0199;CIL0922S0092;CIL1018S0043;CIL0972S0110;CIL0893S0210;CIL1030S0123;CIL1068S0035;CIL1092S0098;CIL0993S0004;CIL1105S0008;CIL0974S0004;CIL1092S0031;CIL0902S0189;CIL1012S0046;CIL0895S0079
GO:0031969	Cellular Component	chloroplast membrane	0.0180169	CIL0974S0085;CIL0996S0098;CIL1100S0024;CIL0945S0075
GO:0009514	Cellular Component	glyoxysome	0.0285216	CIL0937S0112;CIL0979S0178;CIL0895S0150
GO:0030686	Cellular Component	90S preribosome	0.0285216	CIL0970S0136;CIL1021S0061;CIL0922S0254
GO:0000177	Cellular Component	cytoplasmic exosome (RNase complex)	0.0353172	CIL0902S0132;CIL0914S0107;CIL0938S0098;CIL0951S0135
GO:0005779	Cellular Component	integral component of peroxisomal membrane	0.0353172	CIL0984S0112;CIL1009S0124;CIL0992S0094;CIL1114S0028
GO:0015629	Cellular Component	actin cytoskeleton	0.0408807	CIL0978S0103;CIL0990S0122;CIL1038S0103;CIL0917S0059;CIL1032S0054;CIL0996S0063;CIL1084S0086
GO:0000812	Cellular Component	Swr1 complex	0.0413769	CIL0972S0109;CIL0962S0023
GO:0005965	Cellular Component	protein farnesyltransferase complex	0.0413769	CIL1118S0058;CIL0951S0103
GO:0031083	Cellular Component	BLOC-1 complex	0.0413769	CIL0945S0124;CIL1064S0118
GO:0016758	Molecular Function	transferase activity, transferring hexosyl groups	0.000194484	CIL1128S0044;CIL0922S0097;CIL0893S0202;CIL0989S0050;CIL0922S0099;CIL0972S0122;CIL1038S0014;CIL1034S0088;CIL1118S0072;CIL0893S0352;CIL1167S0018;CIL0989S0049;CIL1001S0033;CIL1038S0016;CIL0923S0273;CIL1038S0015;CIL1003S0138;CIL1092S0113;CIL0899S0121;CIL1031S0128;CIL1020S0012;CIL1092S0110;CIL1093S0031;CIL0922S0100
GO:0042299	Molecular Function	lupeol synthase activity	0.000376203	CIL0921S0113;CIL0996S0051;CIL1025S0008;CIL0996S0048;CIL1025S0004
GO:0004497	Molecular Function	monooxygenase activity	0.00186529	CIL1015S0061;CIL0897S0001;CIL0897S0029;CIL0929S0129;CIL1018S0024;CIL0925S0106;CIL0982S0140;CIL0993S0094;CIL1009S0100;CIL0990S0081;CIL0982S0003;CIL1025S0003;CIL0946S0082;CIL0992S0099;CIL0979S0064;CIL0976S0152;CIL0893S0072;CIL0970S0129;CIL0970S0098;CIL0929S0126;CIL1141S0057;CIL0970S0099;CIL1048S0016;CIL0957S0133;CIL1025S0007;CIL0957S0001;CIL1015S0062;CIL1015S0064;CIL1018S0023;CIL0922S0005;CIL1075S0…
GO:0017150	Molecular Function	tRNA dihydrouridine synthase activity	0.00186893	CIL0919S0175;CIL1037S0089;CIL0919S0174;CIL1038S0043;CIL0979S0167
GO:0020037	Molecular Function	heme binding	0.00251667	CIL0970S0129;CIL1066S0082;CIL0993S0094;CIL1102S0095;CIL0982S0140;CIL0957S0047;CIL1114S0035;CIL0914S0008;CIL0929S0129;CIL1003S0044;CIL1096S0077;CIL1071S0038;CIL0893S0242;CIL1037S0031;CIL0945S0123;CIL1029S0061;CIL0957S0001;CIL0945S0125;CIL1141S0057;CIL0976S0152;CIL1060S0070;CIL1025S0003;CIL1114S0036;CIL0899S0112;CIL0948S0156;CIL0942S0136;CIL0909S0129;CIL0925S0106;CIL1018S0010;CIL1066S0083;CIL0962S0…
GO:0003682	Molecular Function	chromatin binding	0.00277715	CIL0940S0092;CIL0992S0065;CIL0948S0043;CIL0953S0071;CIL1029S0068;CIL1025S0080;CIL0893S0225;CIL1009S0042;CIL0982S0009;CIL0925S0039;CIL0951S0099;CIL1099S0017;CIL1012S0020;CIL1030S0084;CIL0978S0081;CIL1090S0087;CIL0899S0057;CIL1066S0092;CIL0902S0160;CIL1127S0053;CIL0946S0125
GO:0004527	Molecular Function	exonuclease activity	0.00522573	CIL1105S0029;CIL0951S0135;CIL0914S0107;CIL1096S0021;CIL0946S0003;CIL0912S0086;CIL0957S0061;CIL0938S0098
GO:0044822	Molecular Function	RNA binding	0.00533142	CIL0970S0061;CIL1068S0069;CIL0996S0086;CIL0906S0002;CIL1075S0088;CIL0909S0079;CIL0938S0084;CIL1084S0033;CIL1068S0070
GO:0004766	Molecular Function	spermidine synthase activity	0.00542263	CIL0914S0054;CIL0940S0104;CIL0906S0176;CIL1050S0016;CIL1114S0025
GO:0016705	Molecular Function	oxidoreductase activity, acting on paired donors, with incorporation or reduction of molecular oxygen	0.00635124	CIL1096S0077;CIL0970S0097;CIL1048S0020;CIL0957S0131;CIL1096S0047;CIL1127S0085;CIL1043S0082;CIL0895S0023;CIL1075S0018;CIL0922S0005;CIL1018S0023;CIL0957S0001;CIL0957S0133;CIL0899S0179;CIL1025S0007;CIL0970S0099;CIL1141S0057;CIL0929S0126;CIL0970S0098;CIL1104S0057;CIL0893S0072;CIL0970S0129;CIL0976S0152;CIL0979S0064;CIL0992S0099;CIL0946S0082;CIL1025S0003;CIL0982S0003;CIL0990S0081;CIL1009S0100;CIL0993S0…
GO:0015416	Molecular Function	ATPase-coupled organic phosphonate transmembrane transporter activity	0.0084281	CIL0982S0130;CIL1064S0026;CIL0893S0232;CIL0970S0100;CIL0921S0023;CIL0937S0161;CIL1047S0014
GO:0052906	Molecular Function	tRNA (guanine(37)-N(1))-methyltransferase activity	0.00882214	CIL0895S0241;CIL0979S0033;CIL0979S0032
GO:0004828	Molecular Function	serine-tRNA ligase activity	0.00882214	CIL1087S0036;CIL0909S0163;CIL1055S0034
GO:0003883	Molecular Function	CTP synthase activity	0.0120027	CIL0993S0017;CIL0906S0123;CIL0993S0041;CIL0906S0124;CIL0914S0002
GO:0030060	Molecular Function	L-malate dehydrogenase activity	0.0120027	CIL1076S0081;CIL1025S0061;CIL0937S0112;CIL0979S0178;CIL0935S0043
GO:0008574	Molecular Function	ATP-dependent microtubule motor activity, plus-end-directed	0.0120027	CIL0929S0139;CIL1050S0029;CIL1023S0023;CIL0899S0070;CIL1100S0084
GO:0016702	Molecular Function	oxidoreductase activity, acting on single donors with incorporation of molecular oxygen, incorporation of two atoms of oxygen	0.0123004	CIL0917S0011;CIL0987S0116;CIL0902S0148;CIL1105S0032;CIL0940S0191;CIL1055S0047;CIL1104S0053;CIL1061S0087;CIL1034S0026;CIL1127S0095;CIL0919S0181;CIL1038S0109;CIL0895S0195;CIL1055S0048
GO:0004857	Molecular Function	enzyme inhibitor activity	0.0183839	CIL1132S0052;CIL1015S0058;CIL1132S0055;CIL0923S0075;CIL0972S0110;CIL0967S0050;CIL1003S0092;CIL1015S0049;CIL0899S0042;CIL1001S0032;CIL1050S0084;CIL1001S0030;CIL0951S0156
GO:0000977	Molecular Function	RNA polymerase II regulatory region sequence-specific DNA binding	0.0187727	CIL0938S0090;CIL1029S0068;CIL0948S0043;CIL0902S0160;CIL1066S0092;CIL1096S0082;CIL1009S0042;CIL1096S0081;CIL0893S0225;CIL0946S0125;CIL0906S0181
GO:0004322	Molecular Function	ferroxidase activity	0.0190779	CIL0946S0092;CIL0895S0108;CIL1127S0046;CIL1114S0068
GO:0033612	Molecular Function	receptor serine/threonine kinase binding	0.0190779	CIL0951S0170;CIL0937S0005;CIL0979S0177;CIL1040S0060
GO:0008199	Molecular Function	ferric iron binding	0.0190779	CIL0895S0108;CIL1127S0046;CIL1114S0068;CIL0946S0092
GO:0001085	Molecular Function	RNA polymerase II transcription factor binding	0.0214563	CIL0902S0160;CIL1066S0092;CIL1009S0042;CIL0893S0225;CIL0946S0125;CIL1029S0068;CIL0948S0043
GO:0047672	Molecular Function	anthranilate N-benzoyltransferase activity	0.0224458	CIL1018S0122;CIL1018S0121;CIL0942S0001;CIL1021S0113;CIL1040S0011
GO:0004185	Molecular Function	serine-type carboxypeptidase activity	0.0228304	CIL0951S0124;CIL0893S0126;CIL0957S0034;CIL0951S0121;CIL0923S0193;CIL1051S0074;CIL1064S0072;CIL0925S0124;CIL1055S0065;CIL0906S0095;CIL0979S0093;CIL1048S0024;CIL0912S0066;CIL0919S0195;CIL0979S0094;CIL0951S0129
GO:0050638	Molecular Function	taxadien-5-alpha-ol O-acetyltransferase activity	0.0298225	CIL0948S0179;CIL0945S0134;CIL1127S0030
GO:0016992	Molecular Function	lipoate synthase activity	0.0298225	CIL0998S0060;CIL0908S0166;CIL1066S0025
GO:0004615	Molecular Function	phosphomannomutase activity	0.0298225	CIL0978S0088;CIL1009S0118;CIL1009S0117
GO:0003677	Molecular Function	DNA binding	0.0347855	CIL0998S0021;CIL0993S0083;CIL0899S0078;CIL1032S0063;CIL0940S0017;CIL0990S0065;CIL1118S0032;CIL0902S0188;CIL0899S0057;CIL1087S0008;CIL1092S0004;CIL1002S0096;CIL1002S0077;CIL0998S0069;CIL0938S0133;CIL1001S0097;CIL1076S0110;CIL1090S0087;CIL0948S0108;CIL0957S0136;CIL0922S0218;CIL0893S0366;CIL0984S0083;CIL1023S0011;CIL1032S0003;CIL1032S0052;CIL1060S0087;CIL1025S0080;CIL0990S0114;CIL1028S0077;CIL1006S0…
GO:0046983	Molecular Function	protein dimerization activity	0.0348426	CIL1003S0120;CIL0909S0218;CIL1105S0057;CIL0948S0212;CIL0938S0090;CIL0893S0358;CIL0897S0016;CIL1093S0112;CIL0945S0059;CIL1084S0028;CIL0987S0166;CIL1055S0022;CIL1071S0017;CIL0979S0048;CIL0935S0016;CIL1071S0051;CIL1118S0009;CIL0908S0133;CIL0893S0307;CIL1068S0079;CIL0919S0170;CIL1040S0084;CIL1018S0094;CIL0979S0158;CIL0992S0043;CIL1071S0095;CIL0945S0130;CIL0909S0219;CIL0897S0099;CIL0906S0007;CIL0984S0…
GO:0008970	Molecular Function	phosphatidylcholine 1-acylhydrolase activity	0.037285	CIL0902S0172;CIL0967S0205;CIL0893S0319;CIL0897S0136
GO:0005319	Molecular Function	lipid transporter activity	0.037285	CIL1048S0070;CIL1012S0096;CIL0984S0017;CIL0908S0123
GO:0008194	Molecular Function	UDP-glycosyltransferase activity	0.037362	CIL1118S0070;CIL1038S0016;CIL1038S0014;CIL1038S0015;CIL1034S0088
GO:0004310	Molecular Function	farnesyl-diphosphate farnesyltransferase activity	0.0427061	CIL1038S0027;CIL0978S0057
GO:0008935	Molecular Function	1,4-dihydroxy-2-naphthoyl-CoA synthase activity	0.0427061	CIL1068S0036;CIL1068S0035
GO:0008825	Molecular Function	cyclopropane-fatty-acyl-phospholipid synthase activity	0.0427061	CIL1063S0056;CIL1006S0120
GO:0080124	Molecular Function	pheophytinase activity	0.0427061	CIL0976S0070;CIL0919S0144
GO:0046539	Molecular Function	histamine N-methyltransferase activity	0.0427061	CIL0987S0018;CIL1047S0072
GO:0051996	Molecular Function	squalene synthase activity	0.0427061	CIL0978S0057;CIL1038S0027
GO:0008531	Molecular Function	riboflavin kinase activity	0.0427061	CIL0893S0182;CIL0921S0040
GO:0009022	Molecular Function	tRNA nucleotidyltransferase activity	0.0427061	CIL0951S0135;CIL0914S0107
GO:0052866	Molecular Function	phosphatidylinositol phosphate phosphatase activity	0.0427061	CIL1018S0047;CIL0909S0051
GO:0031593	Molecular Function	polyubiquitin modification-dependent protein binding	0.0427061	CIL0974S0093;CIL1051S0043
GO:0015081	Molecular Function	sodium ion transmembrane transporter activity	0.0427061	CIL1087S0048;CIL1071S0048
GO:0016720	Molecular Function	delta12-fatty acid dehydrogenase activity	0.0427061	CIL0987S0038;CIL1047S0089
GO:0047259	Molecular Function	glucomannan 4-beta-mannosyltransferase activity	0.0427061	CIL0908S0046;CIL1003S0109
GO:0030414	Molecular Function	peptidase inhibitor activity	0.0427061	CIL0908S0012;CIL0946S0030
GO:0008446	Molecular Function	GDP-mannose 4,6-dehydratase activity	0.0427061	CIL0992S0014;CIL0992S0015
GO:0030750	Molecular Function	putrescine N-methyltransferase activity	0.0427061	CIL1099S0091;CIL0940S0104
GO:0004044	Molecular Function	amidophosphoribosyltransferase activity	0.0427061	CIL0978S0037;CIL1038S0044
GO:0046408	Molecular Function	chlorophyll synthetase activity	0.0427061	CIL1018S0050;CIL0897S0015
GO:0050307	Molecular Function	sucrose-phosphate phosphatase activity	0.0427061	CIL1006S0066;CIL1047S0031
GO:0008716	Molecular Function	D-alanine-D-alanine ligase activity	0.0427061	CIL1030S0108;CIL1006S0054
GO:0016783	Molecular Function	sulfurtransferase activity	0.0427061	CIL1055S0021;CIL0957S0117
GO:0003949	Molecular Function	1-(5-phosphoribosyl)-5-[(5-phosphoribosylamino)methylideneamino]imidazole-4-carboxamide isomerase activity	0.0427061	CIL0893S0091;CIL1093S0057
GO:0051020	Molecular Function	GTPase binding	0.0427061	CIL0895S0168;CIL0906S0096
GO:0019829	Molecular Function	cation-transporting ATPase activity	0.0441938	CIL1031S0092;CIL0962S0043;CIL0938S0009;CIL0938S0008;CIL0922S0021;CIL1064S0028;CIL1037S0104
GO:0016298	Molecular Function	lipase activity	0.0441938	CIL0970S0133;CIL0912S0132;CIL1048S0012;CIL0937S0015;CIL0914S0120;CIL0937S0017;CIL0897S0018
GO:0005385	Molecular Function	zinc ion transmembrane transporter activity	0.0476251	CIL1071S0052;CIL1071S0050;CIL0893S0262;CIL1071S0049;CIL1071S0071;CIL1031S0084;CIL1099S0050;CIL1071S0069;CIL0923S0272;CIL0974S0038
