# Supplementary material
Source: MDPI journal article supplement (https://www.mdpi.com/1999-4907/14/1/4)
Supplement: s1 [file s1 › Table S4 The DMGs in CHH context potentially related with hormone regulation.xlsx]

## Sheet: Sheet1
Table S4 The DMGs in CHH context potentially related with hormone regulation
Information of DMGs						Information of DMRs
geneId	geneChr	geneStart	geneEnd	geneLength	geneStrand	start	end	width	meth direction	methDif	p	annotation	nr annotation	GO	KEGG
CIL1034S0059	scaffold77792	1130685	1131421	737	+	1128069	1128244	176	strongHyper	0.134	5.39e-13	Promoter (2-3kb)	auxin-induced protein 6B-like [Juglans regia]	response to auxin (GO:0009733)	Plant hormone signal transduction (ko04075)
	scaffold77792	1130685	1131421	737	+	1133900	1133953	54	strongHypo	-0.114	1.61e-05	Distal Intergenic
CIL0978S0034	scaffold74126	309101	309759	659	+	289899	289923	25	strongHypo	-0.402	1.93e-08	Distal Intergenic	auxin-responsive protein SAUR23-like [Juglans regia]
CIL0953S0078	scaffold72571	1511183	1512013	831	+	1515087	1515125	39	strongHypo	-0.225	5.47e-08	Distal Intergenic	auxin-responsive protein SAUR71-like [Juglans regia]
	scaffold72571	1511183	1512013	831	+	1525961	1525990	30	strongHypo	-0.179	6.55e-05	Distal Intergenic
CIL1031S0091	scaffold77570	998622	999083	462	+	979936	980107	172	strongHyper	0.166	4.58e-14	Distal Intergenic	auxin-responsive protein saur50 [Quercus suber]
CIL0948S0237	scaffold72348	2508282	2508710	429	+	2506765	2506898	134	strongHyper	0.143	1.96e-25	Promoter (1-2kb)	auxin-induced protein 6B-like [Juglans regia]
CIL0902S0119	scaffold69238	1879852	1880343	492	+	1878658	1878708	51	strongHyper	0.128	2.39e-05	Promoter (1-2kb)	uncharacterized protein LOC110750014 [Prunus avium]
CIL1025S0090	scaffold77126	1349759	1351262	1504	+	1347716	1347728	13	strongHypo	-0.21	0.000288	Promoter (2-3kb)	auxin-responsive protein SAUR71-like [Juglans regia]
	scaffold77126	1349759	1351262	1504	+	1351564	1351645	82	strongHypo	-0.106	5.9e-06	Distal Intergenic
	scaffold77126	1349759	1351262	1504	+	1354832	1354849	18	strongHypo	-0.268	6.63e-08	Distal Intergenic
CIL0992S0031	scaffold74904	424135	424326	192	-	424724	424746	23	strongHyper	0.289	2.41e-05	Promoter (<=1kb)	auxin-induced protein 15A-like [Juglans regia]
CIL0893S0105	scaffold68792	909323	910214	892	+	907656	907791	136	strongHyper	0.105	0.00124	Promoter (1-2kb)	auxin-responsive protein SAUR15-like [Juglans regia]
CIL0902S0120	scaffold69238	1882606	1883142	537	-	1885035	1885135	101	strongHyper	0.139	5.34e-06	Promoter (1-2kb)	auxin-responsive protein SAUR72-like [Juglans regia]
CIL0992S0030	scaffold74904	417108	417440	333	-	402893	402942	50	strongHypo	-0.102	0.000548	Distal Intergenic	auxin-induced protein 15A-like [Juglans regia]
CIL0948S0241	scaffold72348	2541352	2542214	863	-	2535003	2535021	19	strongHyper	0.2	3.7e-05	Distal Intergenic	auxin-induced protein 15A-like [Juglans regia]
	scaffold72348	2541352	2542214	863	-	2538211	2538240	30	strongHyper	0.174	0.0003	Distal Intergenic
CIL1001S0051	scaffold75348	873438	876166	2729	+	884245	884258	14	strongHypo	-0.201	0.0013	Distal Intergenic	uncharacterized protein LOC109004353 isoform X1 [Juglans regia]
	scaffold75348	873438	876166	2729	+	891856	891904	49	strongHyper	0.104	1.17e-07	Distal Intergenic
	scaffold75348	873438	876166	2729	+	896222	896295	74	strongHypo	-0.122	8.35e-12	Distal Intergenic
CIL0893S0285	scaffold68792	3204645	3210303	5659	-	3212995	3213030	36	strongHypo	-0.134	0.00124	Promoter (2-3kb)	shaggy-related protein kinase eta-like [Juglans regia]
	scaffold68792	3204645	3210303	5659	-	3213923	3213943	21	strongHypo	-0.206	5.94e-06	Distal Intergenic
CIL1038S0047	scaffold78792	442183	443075	893	+	440963	441115	153	strongHyper	0.111	1.12e-07	Promoter (1-2kb)	indole-3-acetic acid-induced protein ARG7-like [Juglans regia]
CIL0906S0049	scaffold69793	636174	639160	2987	+	642215	642224	10	strongHypo	-0.245	9.44e-05	Distal Intergenic	DELLA protein GAI-like [Juglans regia]	response to abscisic acid (GO:0009737)
	scaffold69793	636174	639160	2987	+	669769	669783	15	strongHypo	-0.197	8.21e-07	Distal Intergenic
	scaffold69793	636174	639160	2987	+	680360	680382	23	strongHypo	-0.121	0.000201	Distal Intergenic
	scaffold69793	636174	639160	2987	+	680864	680925	62	strongHypo	-0.156	7.44e-14	Distal Intergenic
	scaffold69793	636174	639160	2987	+	681772	681818	47	strongHypo	-0.154	3.81e-07	Distal Intergenic
	scaffold69793	636174	639160	2987	+	687373	687391	19	strongHyper	0.149	1.34e-05	Distal Intergenic
CIL1050S0068	scaffold79903	1196158	1198545	2388	-	1206978	1207026	49	strongHyper	0.421	7.17e-11	Distal Intergenic	DELLA protein GAIP-like [Juglans regia]
	scaffold79903	1196158	1198545	2388	-	1211039	1211051	13	strongHyper	0.118	5.41e-06	Distal Intergenic
Item	Description
geneId	the ID of DMGs
geneChr	the chromosome in which DMG is located.
geneStart	the start site of the DMG in the chromosome.
geneEnd	the end site of the DMG in the chromosome.
geneLength	the length of the DMG.
geneStrand	"+" represents the sense strand, "-" refers to the antisense strand.
start	the start site of the DMR in the chromosome.
end	the end site of the DMR in the chromosome.
width	the length of the DMR.
meth direction	change type in methylation level of the DMR in PV grafts relative to that of SV grafts (SV: grafts with strong growth vigor on tall rootstocks; PV: grafts with poor growth vigor on short rootstocks)
methDif	the methylation level in DMR of PV grafts – those of SV grafts.
p	significance of differnces in methylation levels of DMRs.
annotation	gene region in which DMR is located.
nr annotation	annotation of DMGs based on nr database.
GO	GO annotation of DMGs.
KEGG	KEGG pathway of DMGs.
