# Supplementary material
Source: MDPI journal article supplement (https://www.mdpi.com/1999-4907/14/1/4)

## Watson strand

## Crick strand

SV2

SV3

# PV1

# PV2

# PV3

SV2

SV3

**PV1**

**PV2**

# PV3

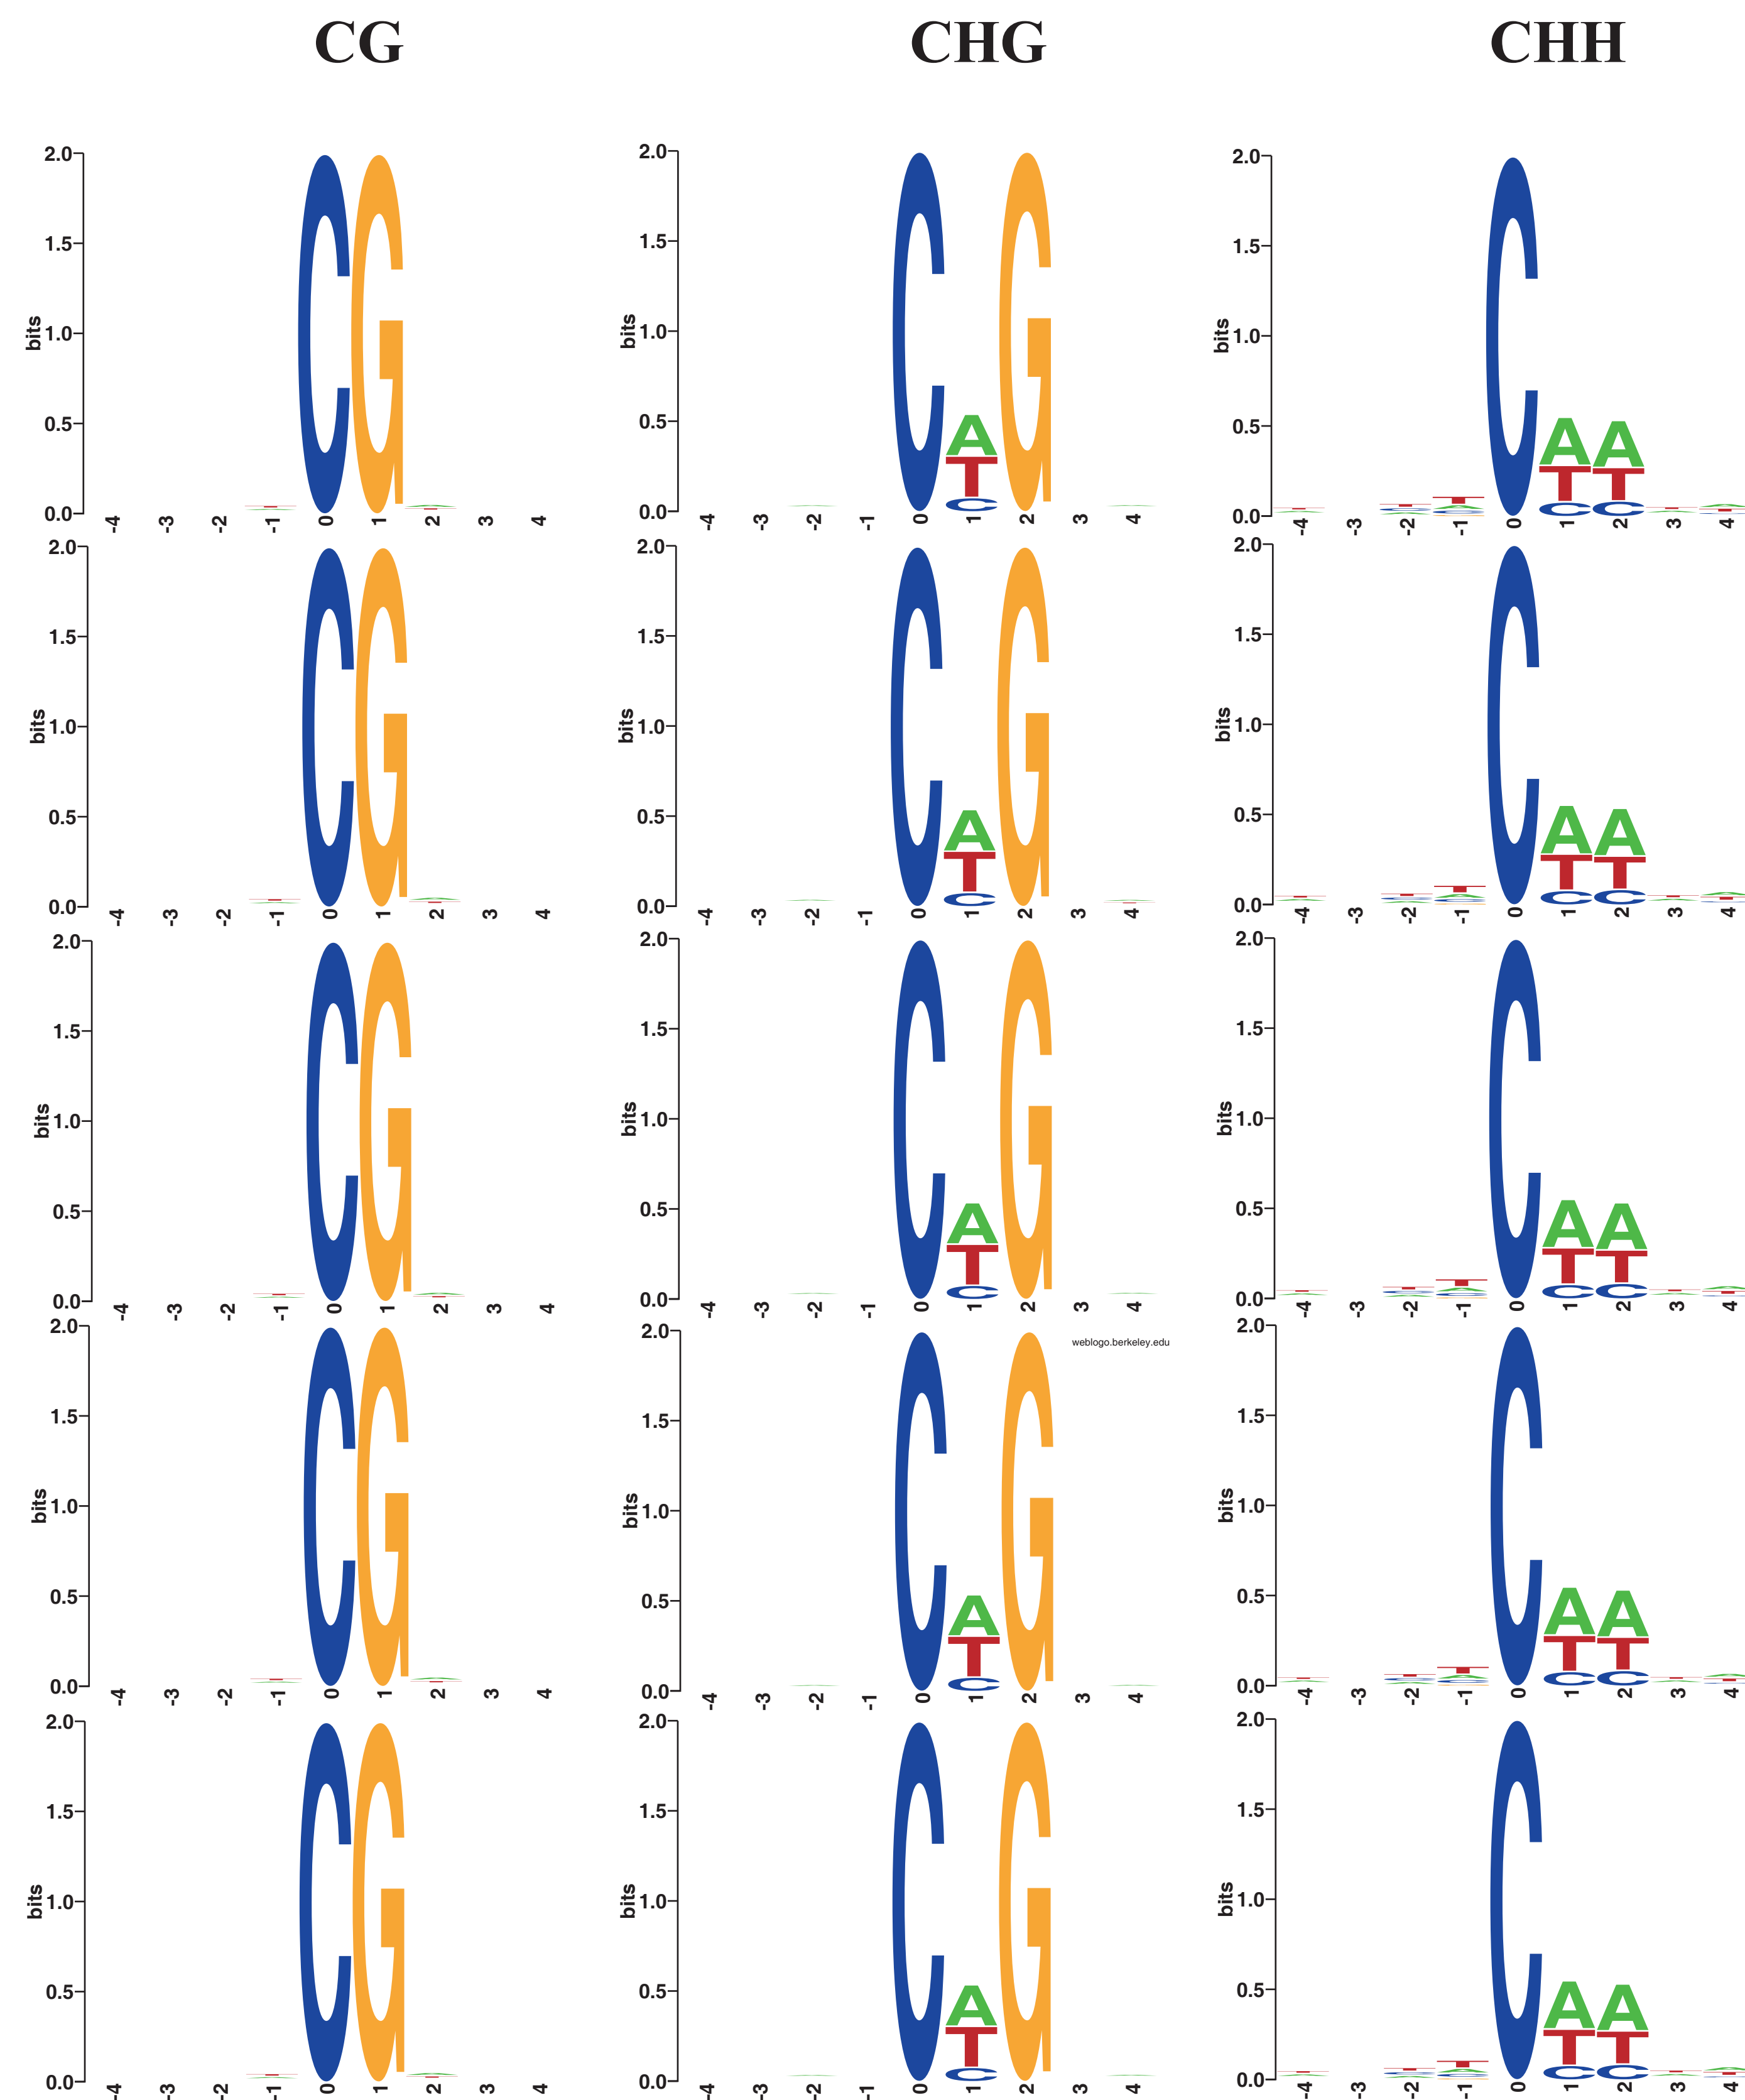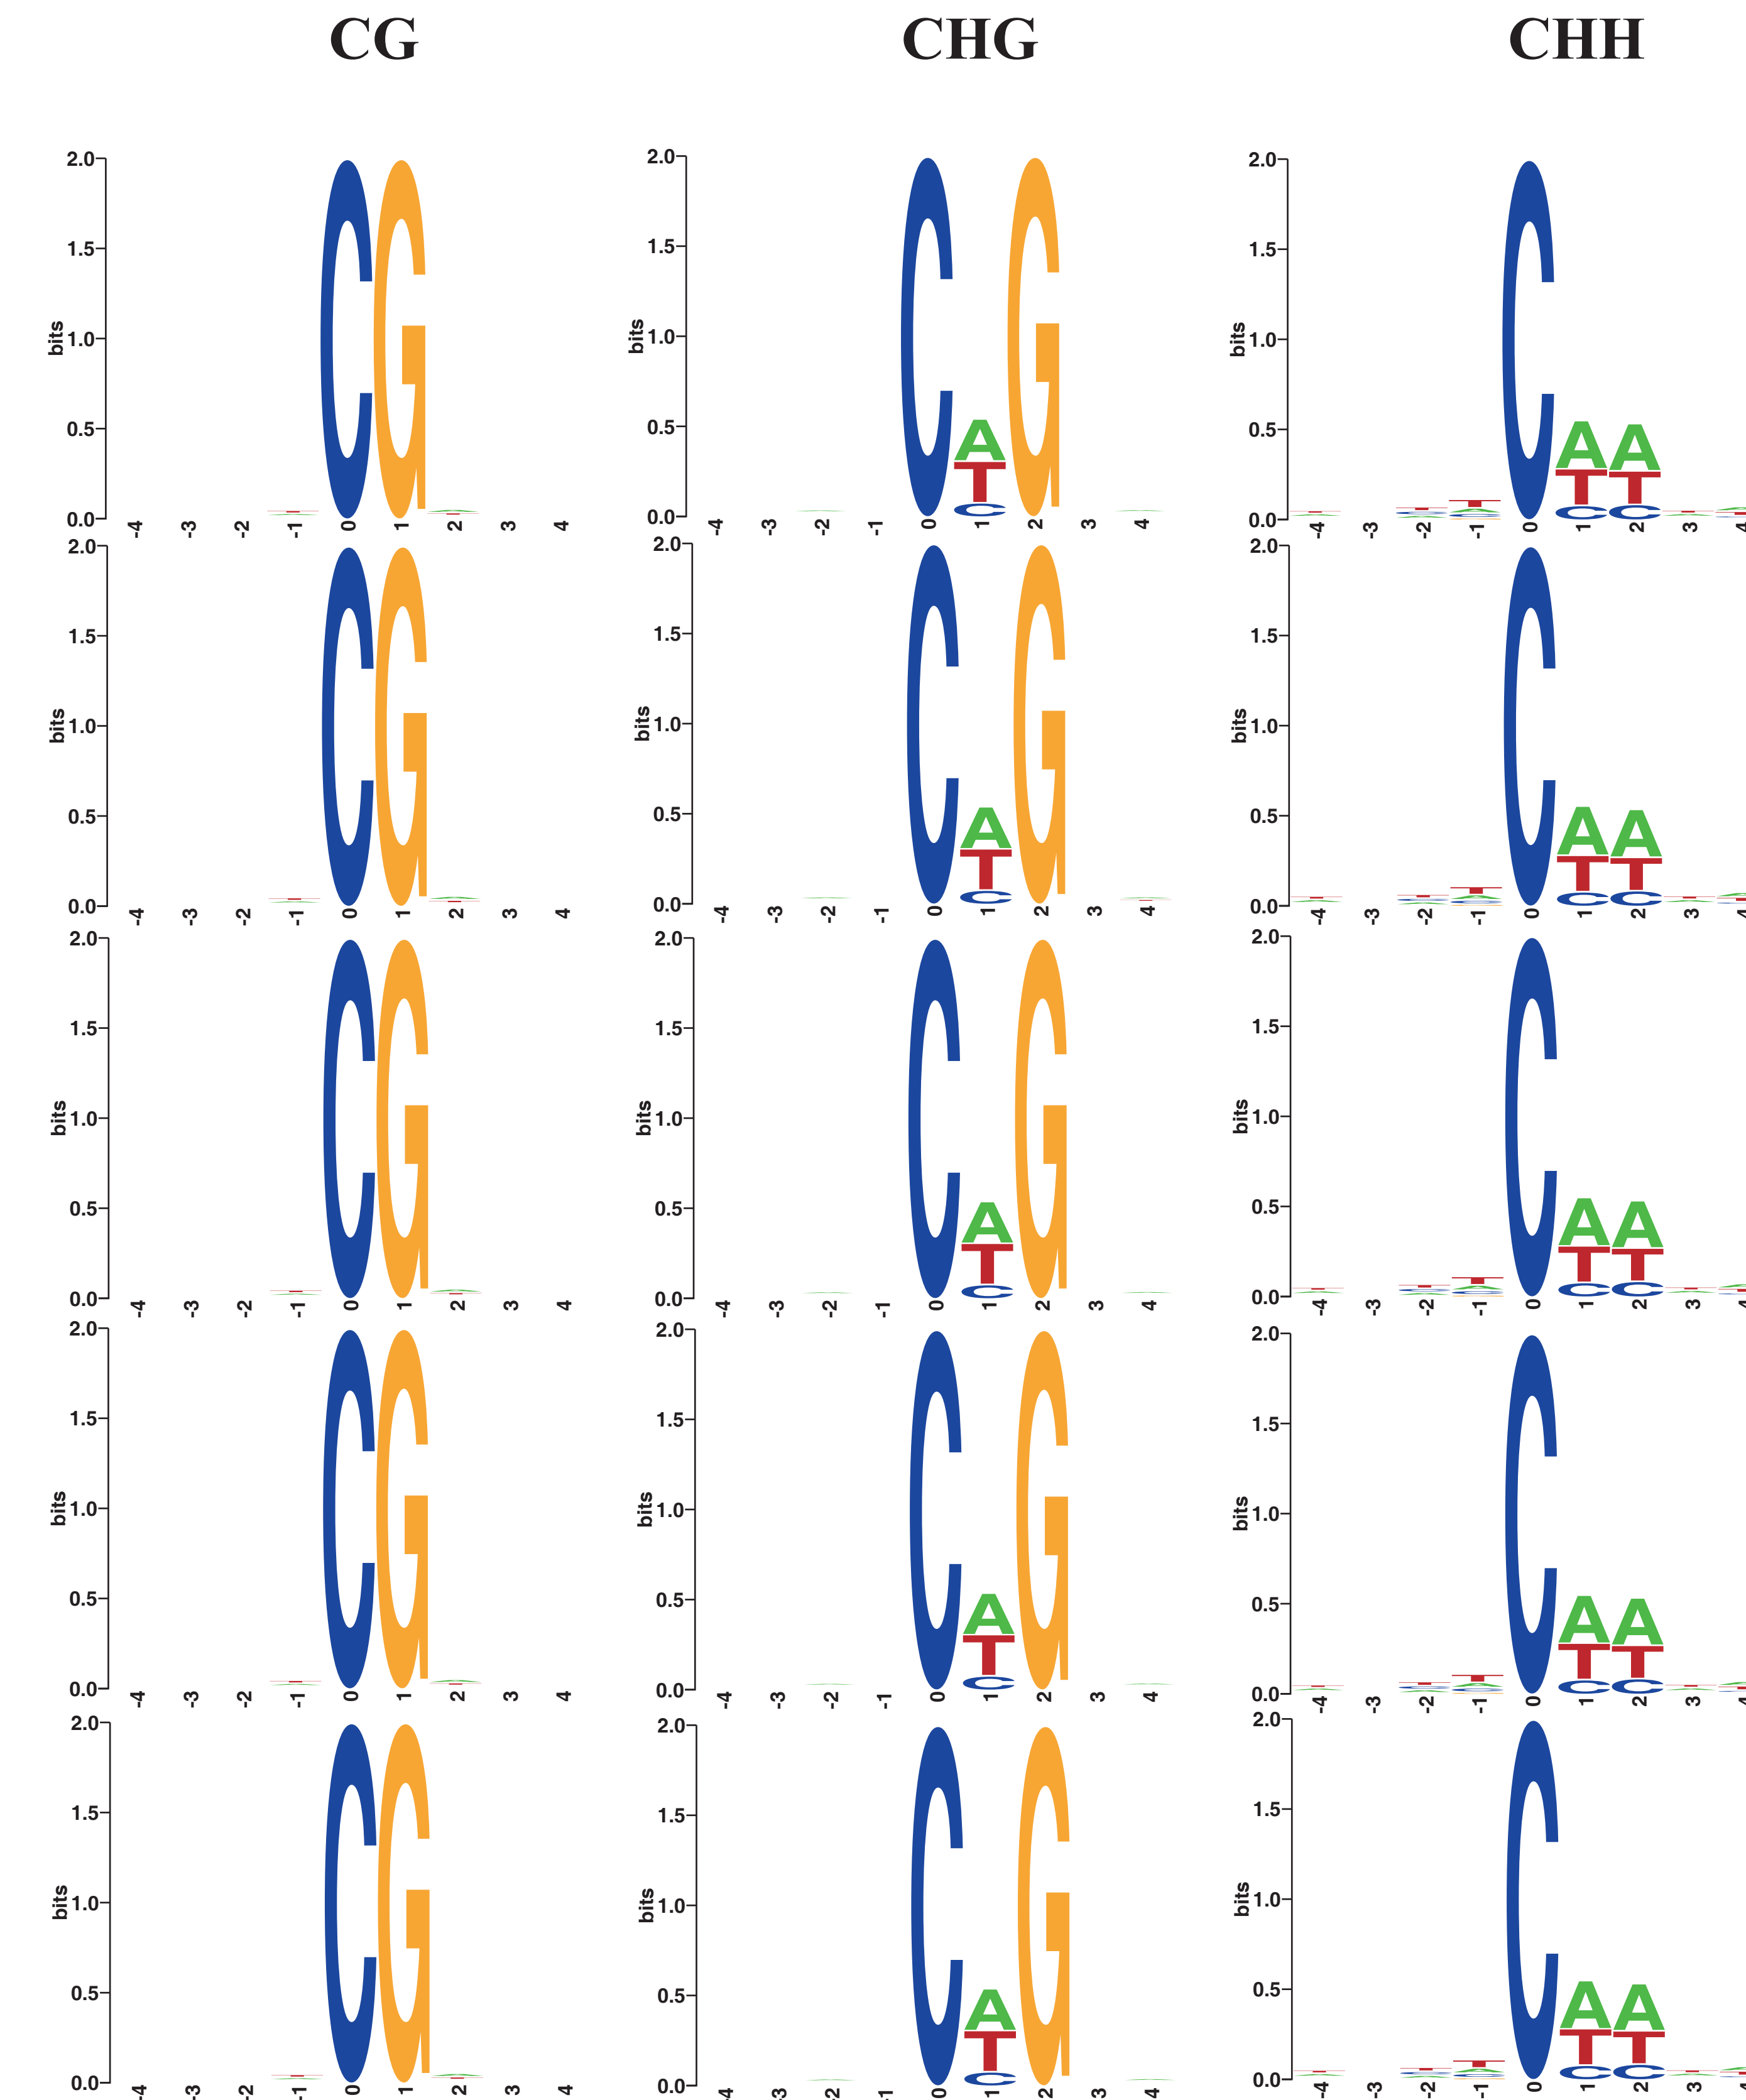

Supplement: s1 [file s1]

CG

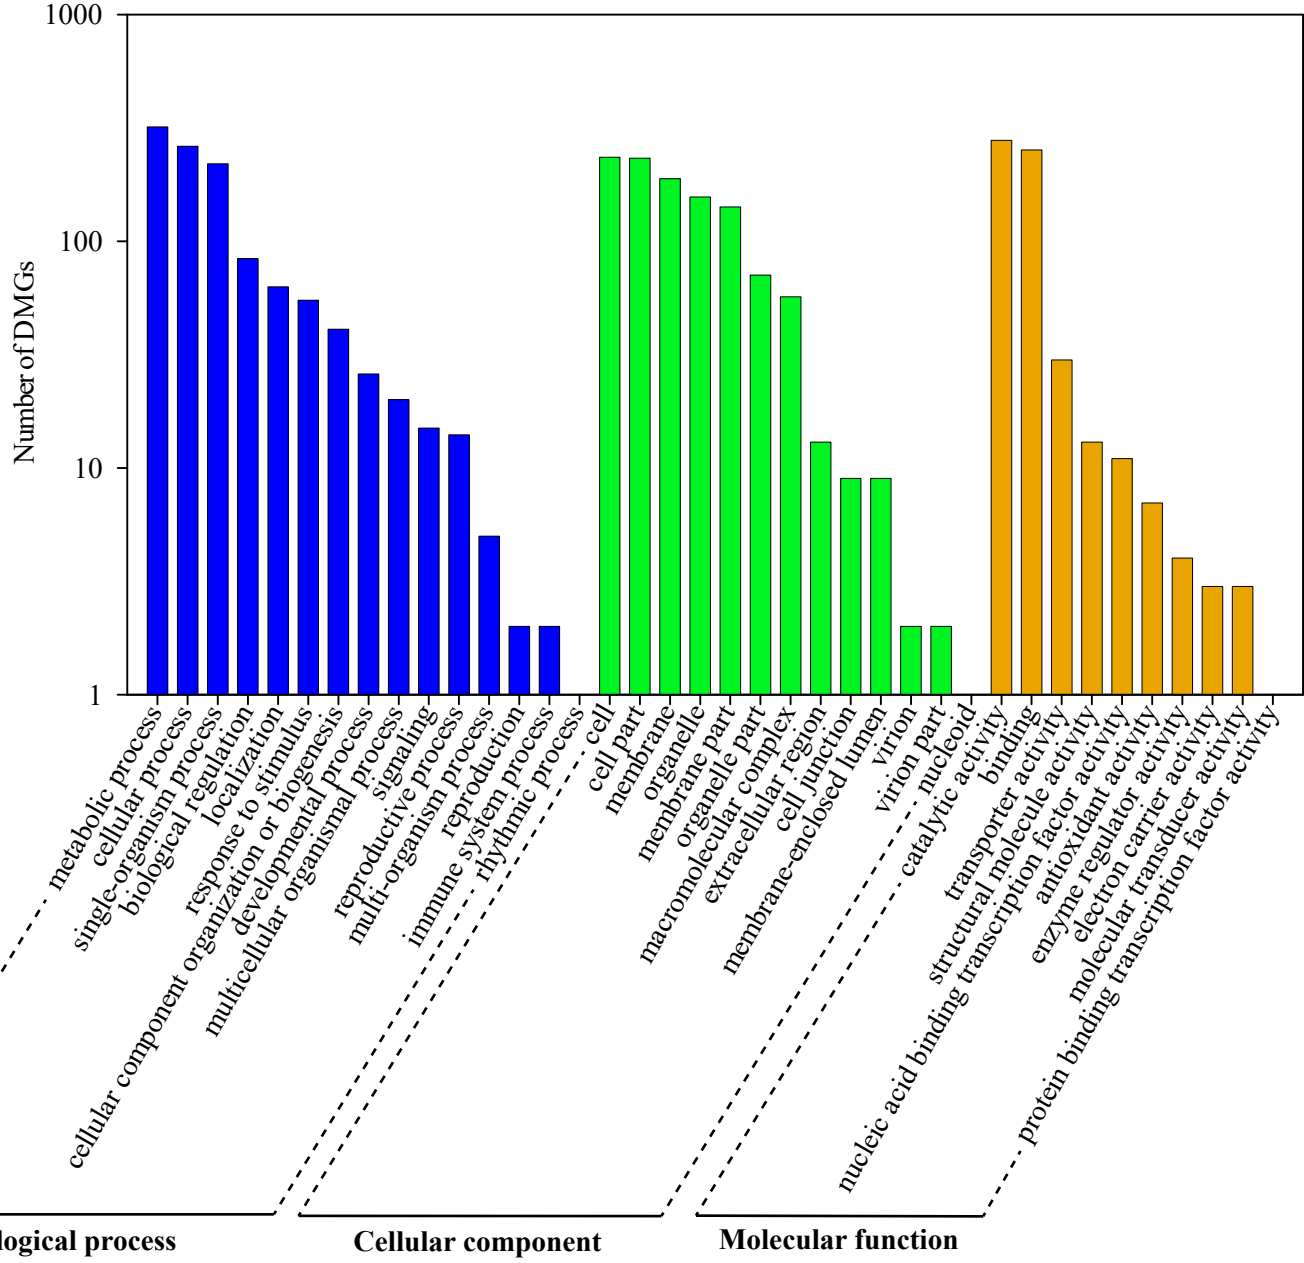

CHG

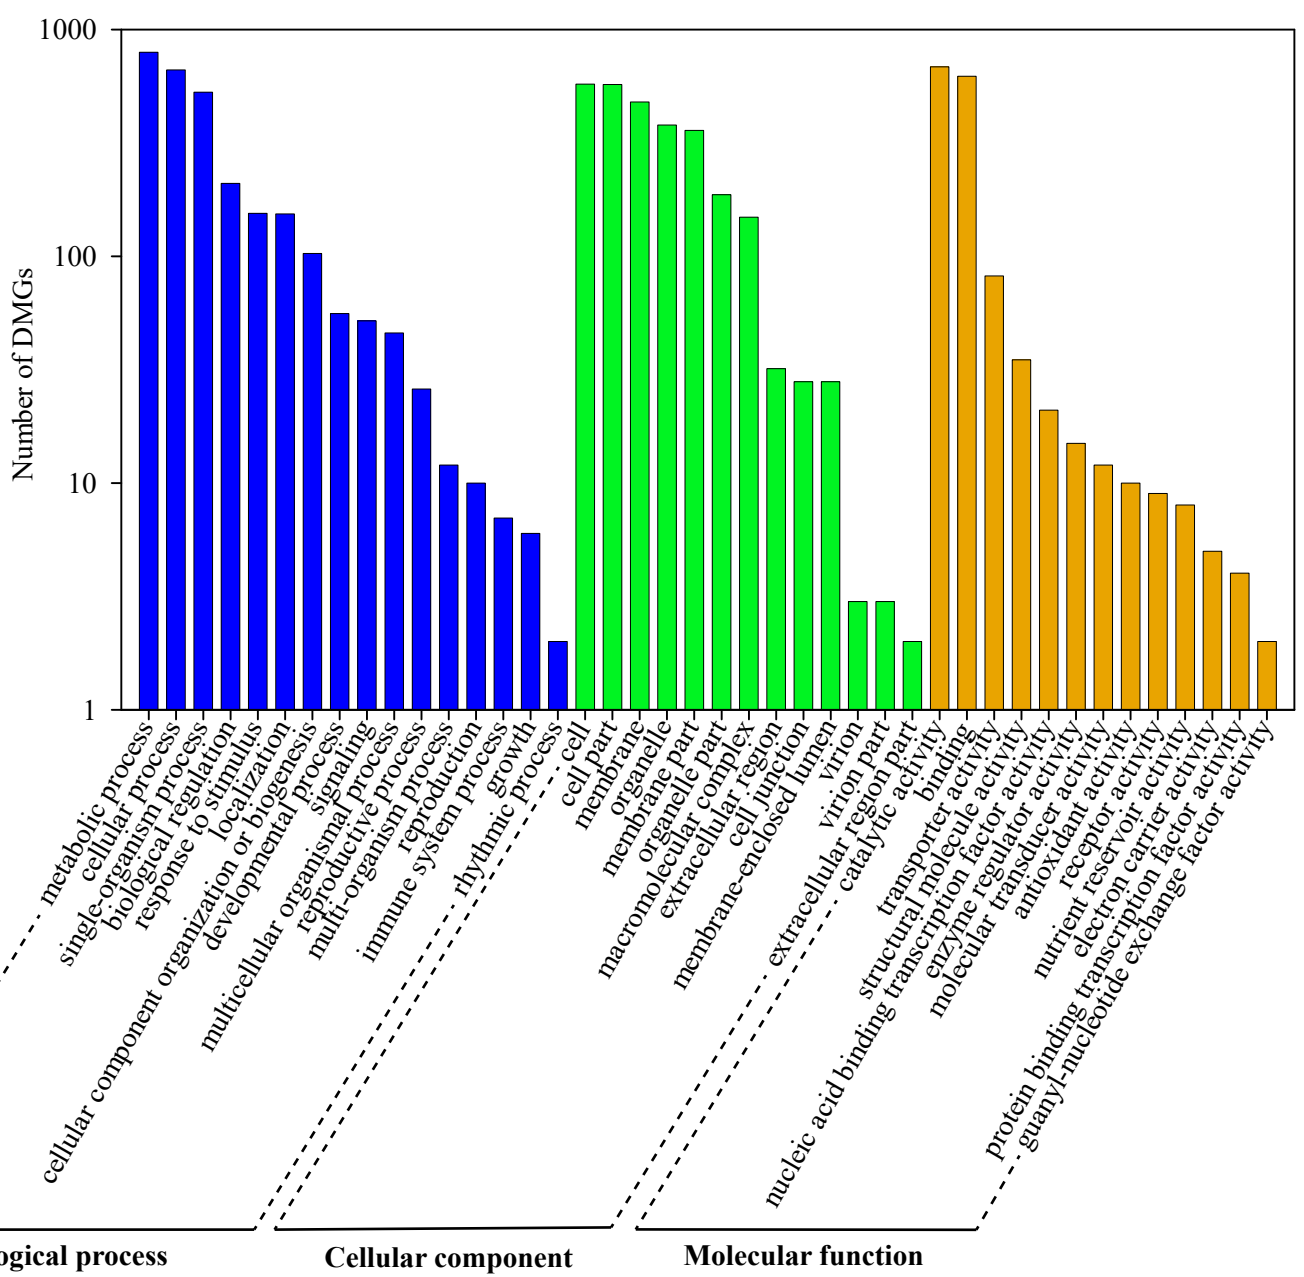

Supplement: s1 [file s1]

CG

Pathway term

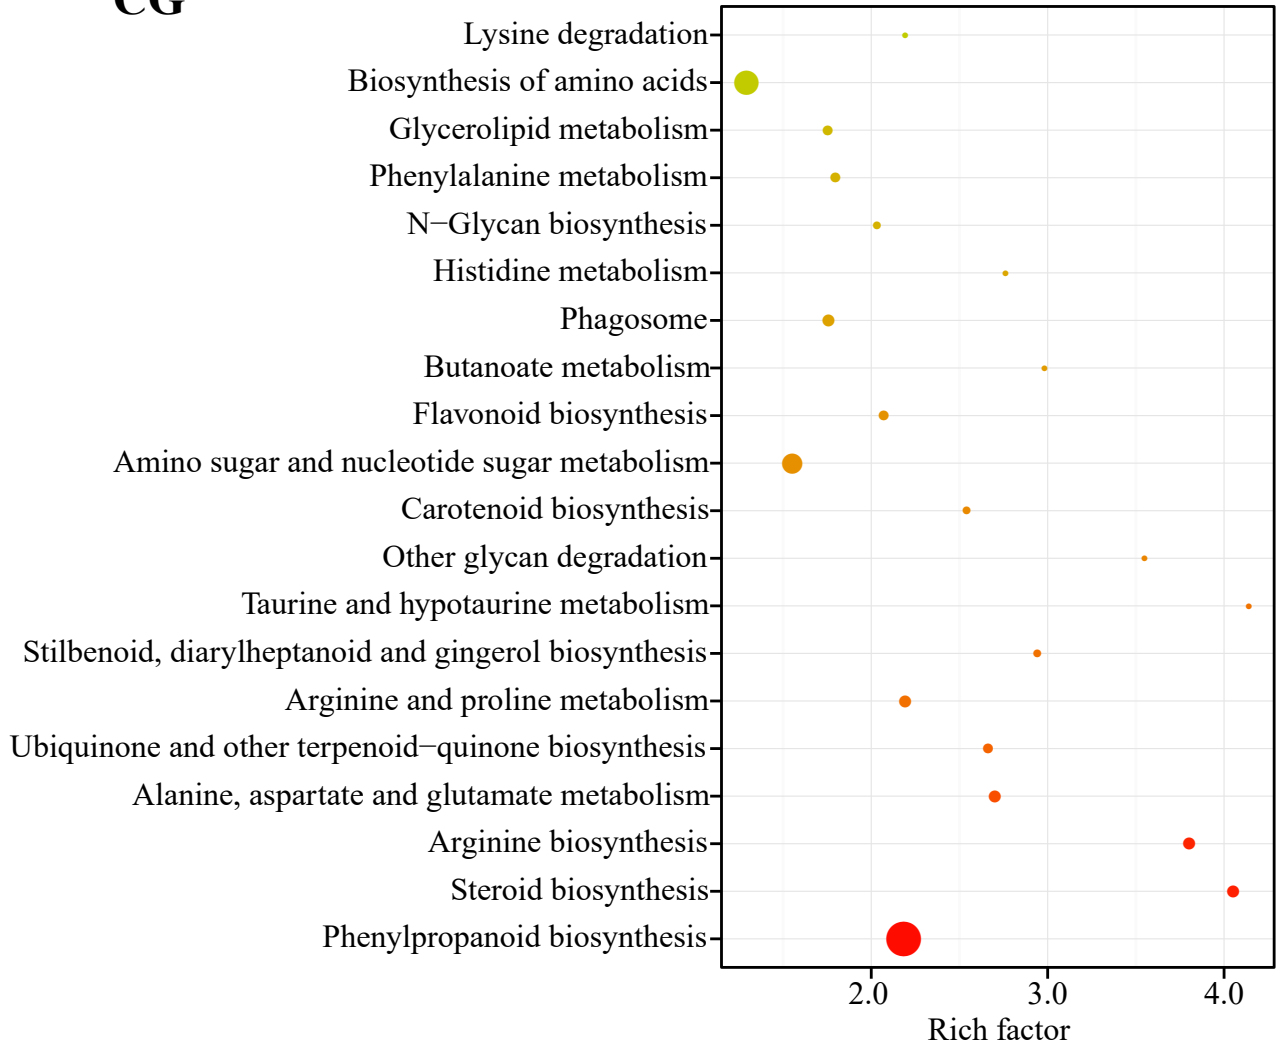

Gene number

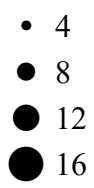

p-value

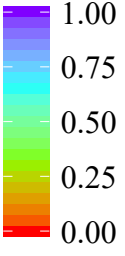

CHG

Pathway term

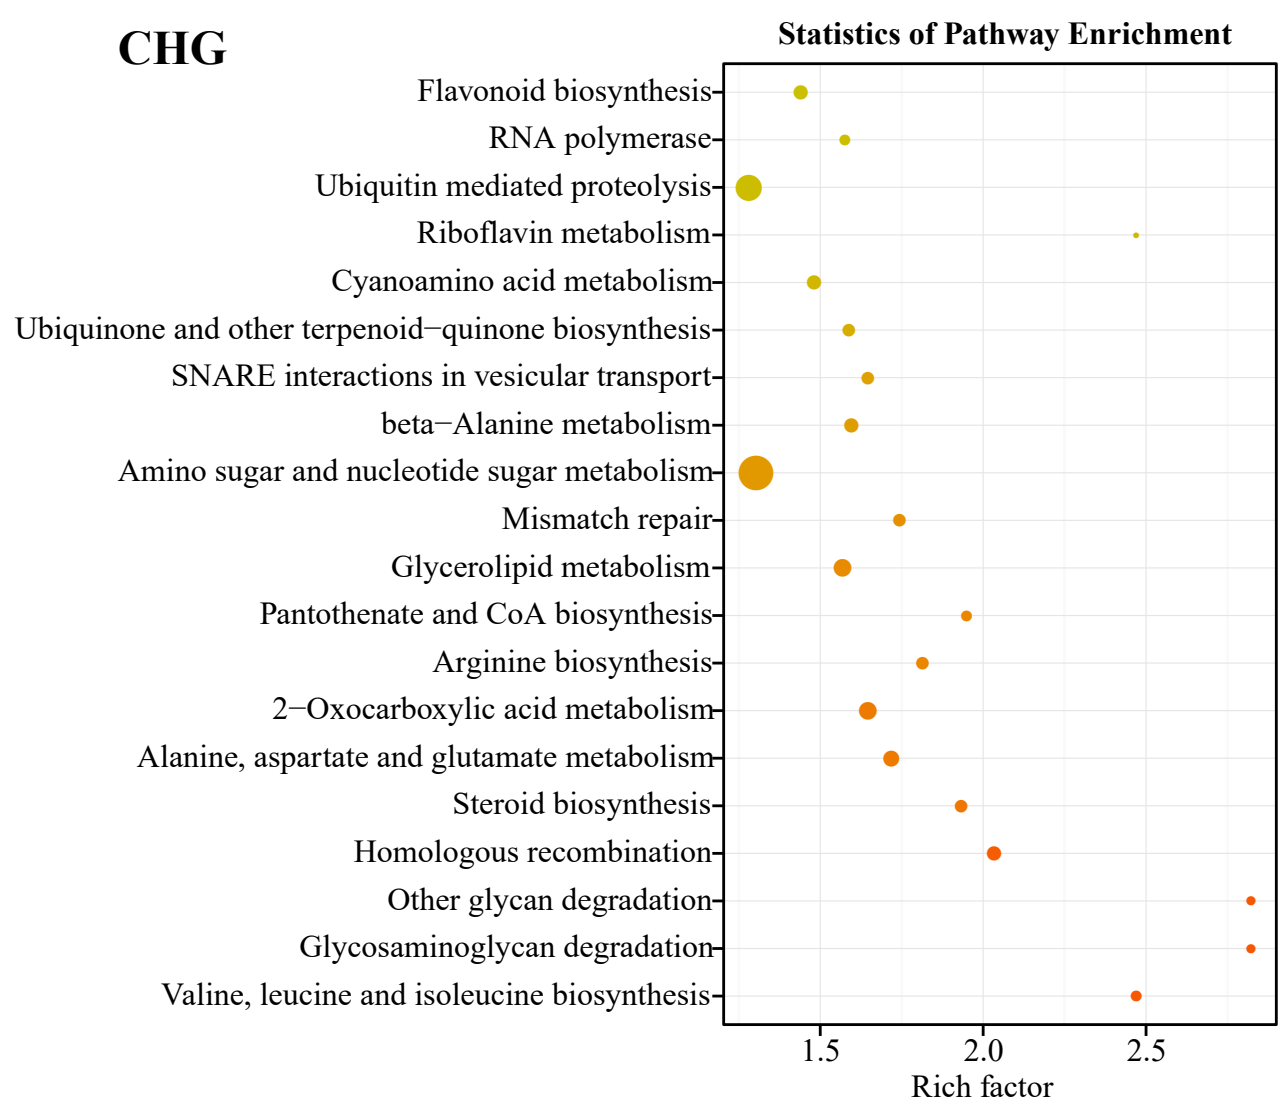

Gene number

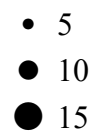

p-value

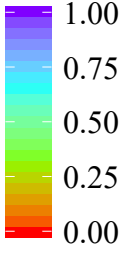

Supplement: s1 [file s1]

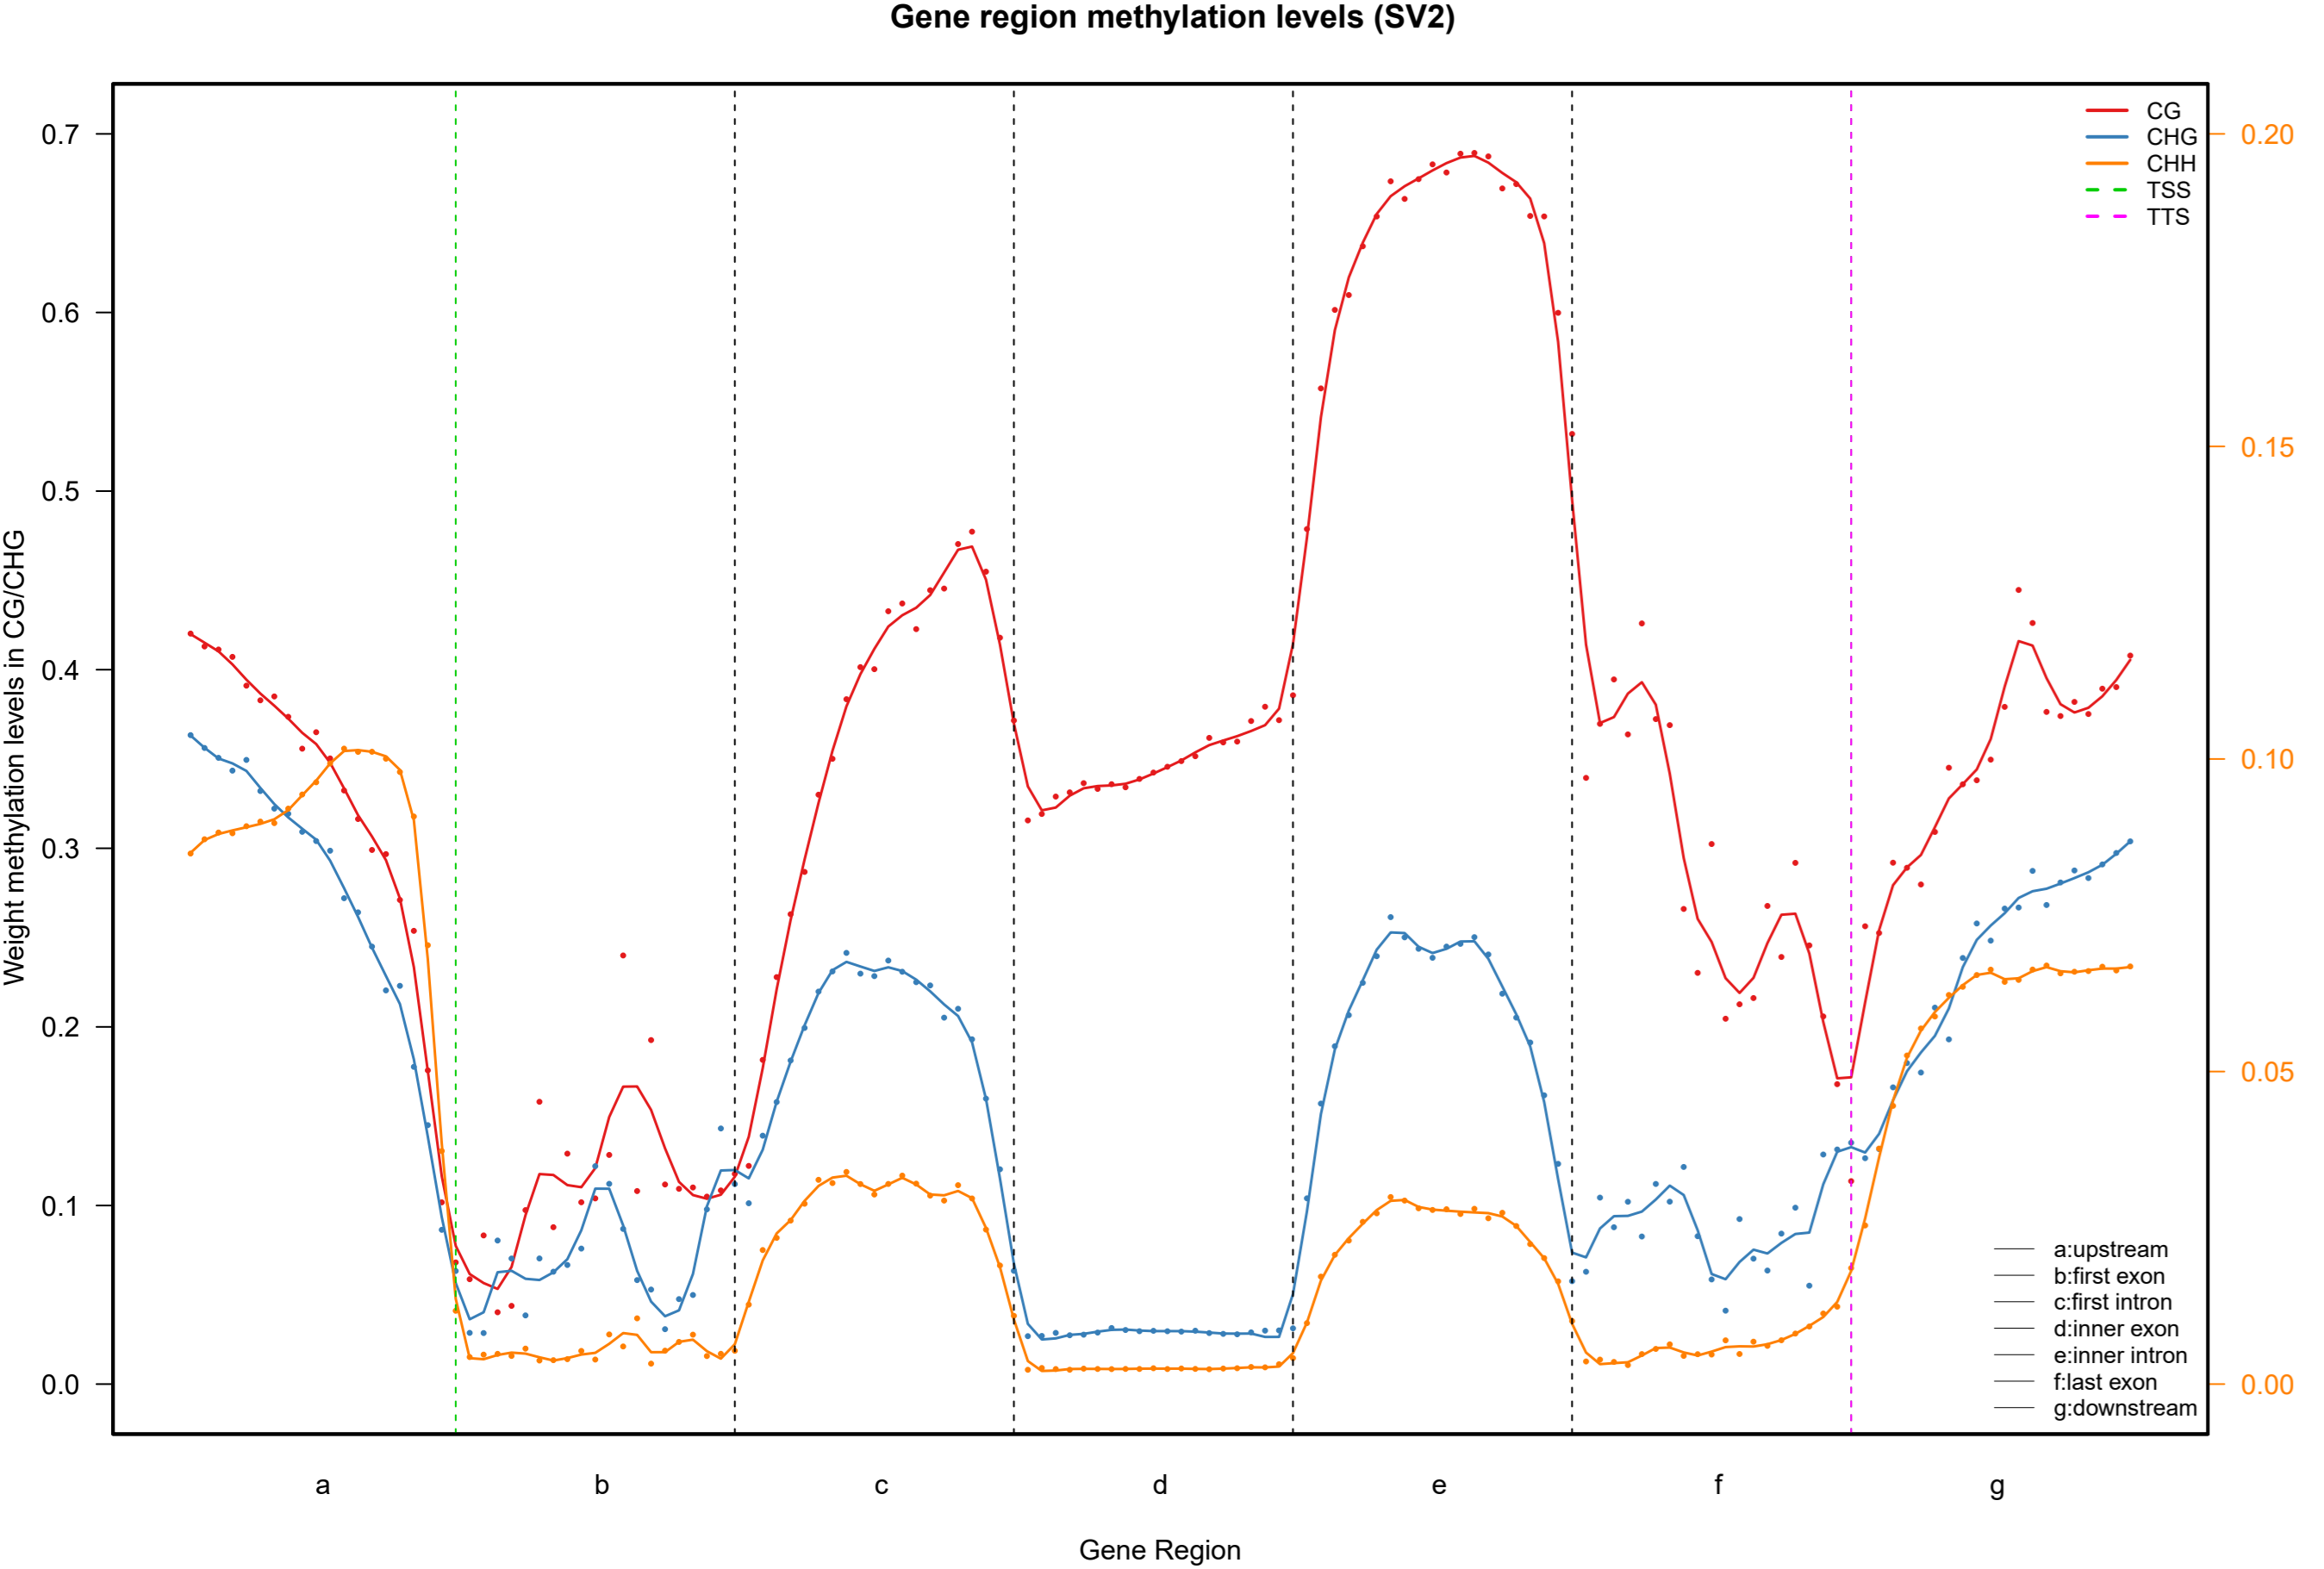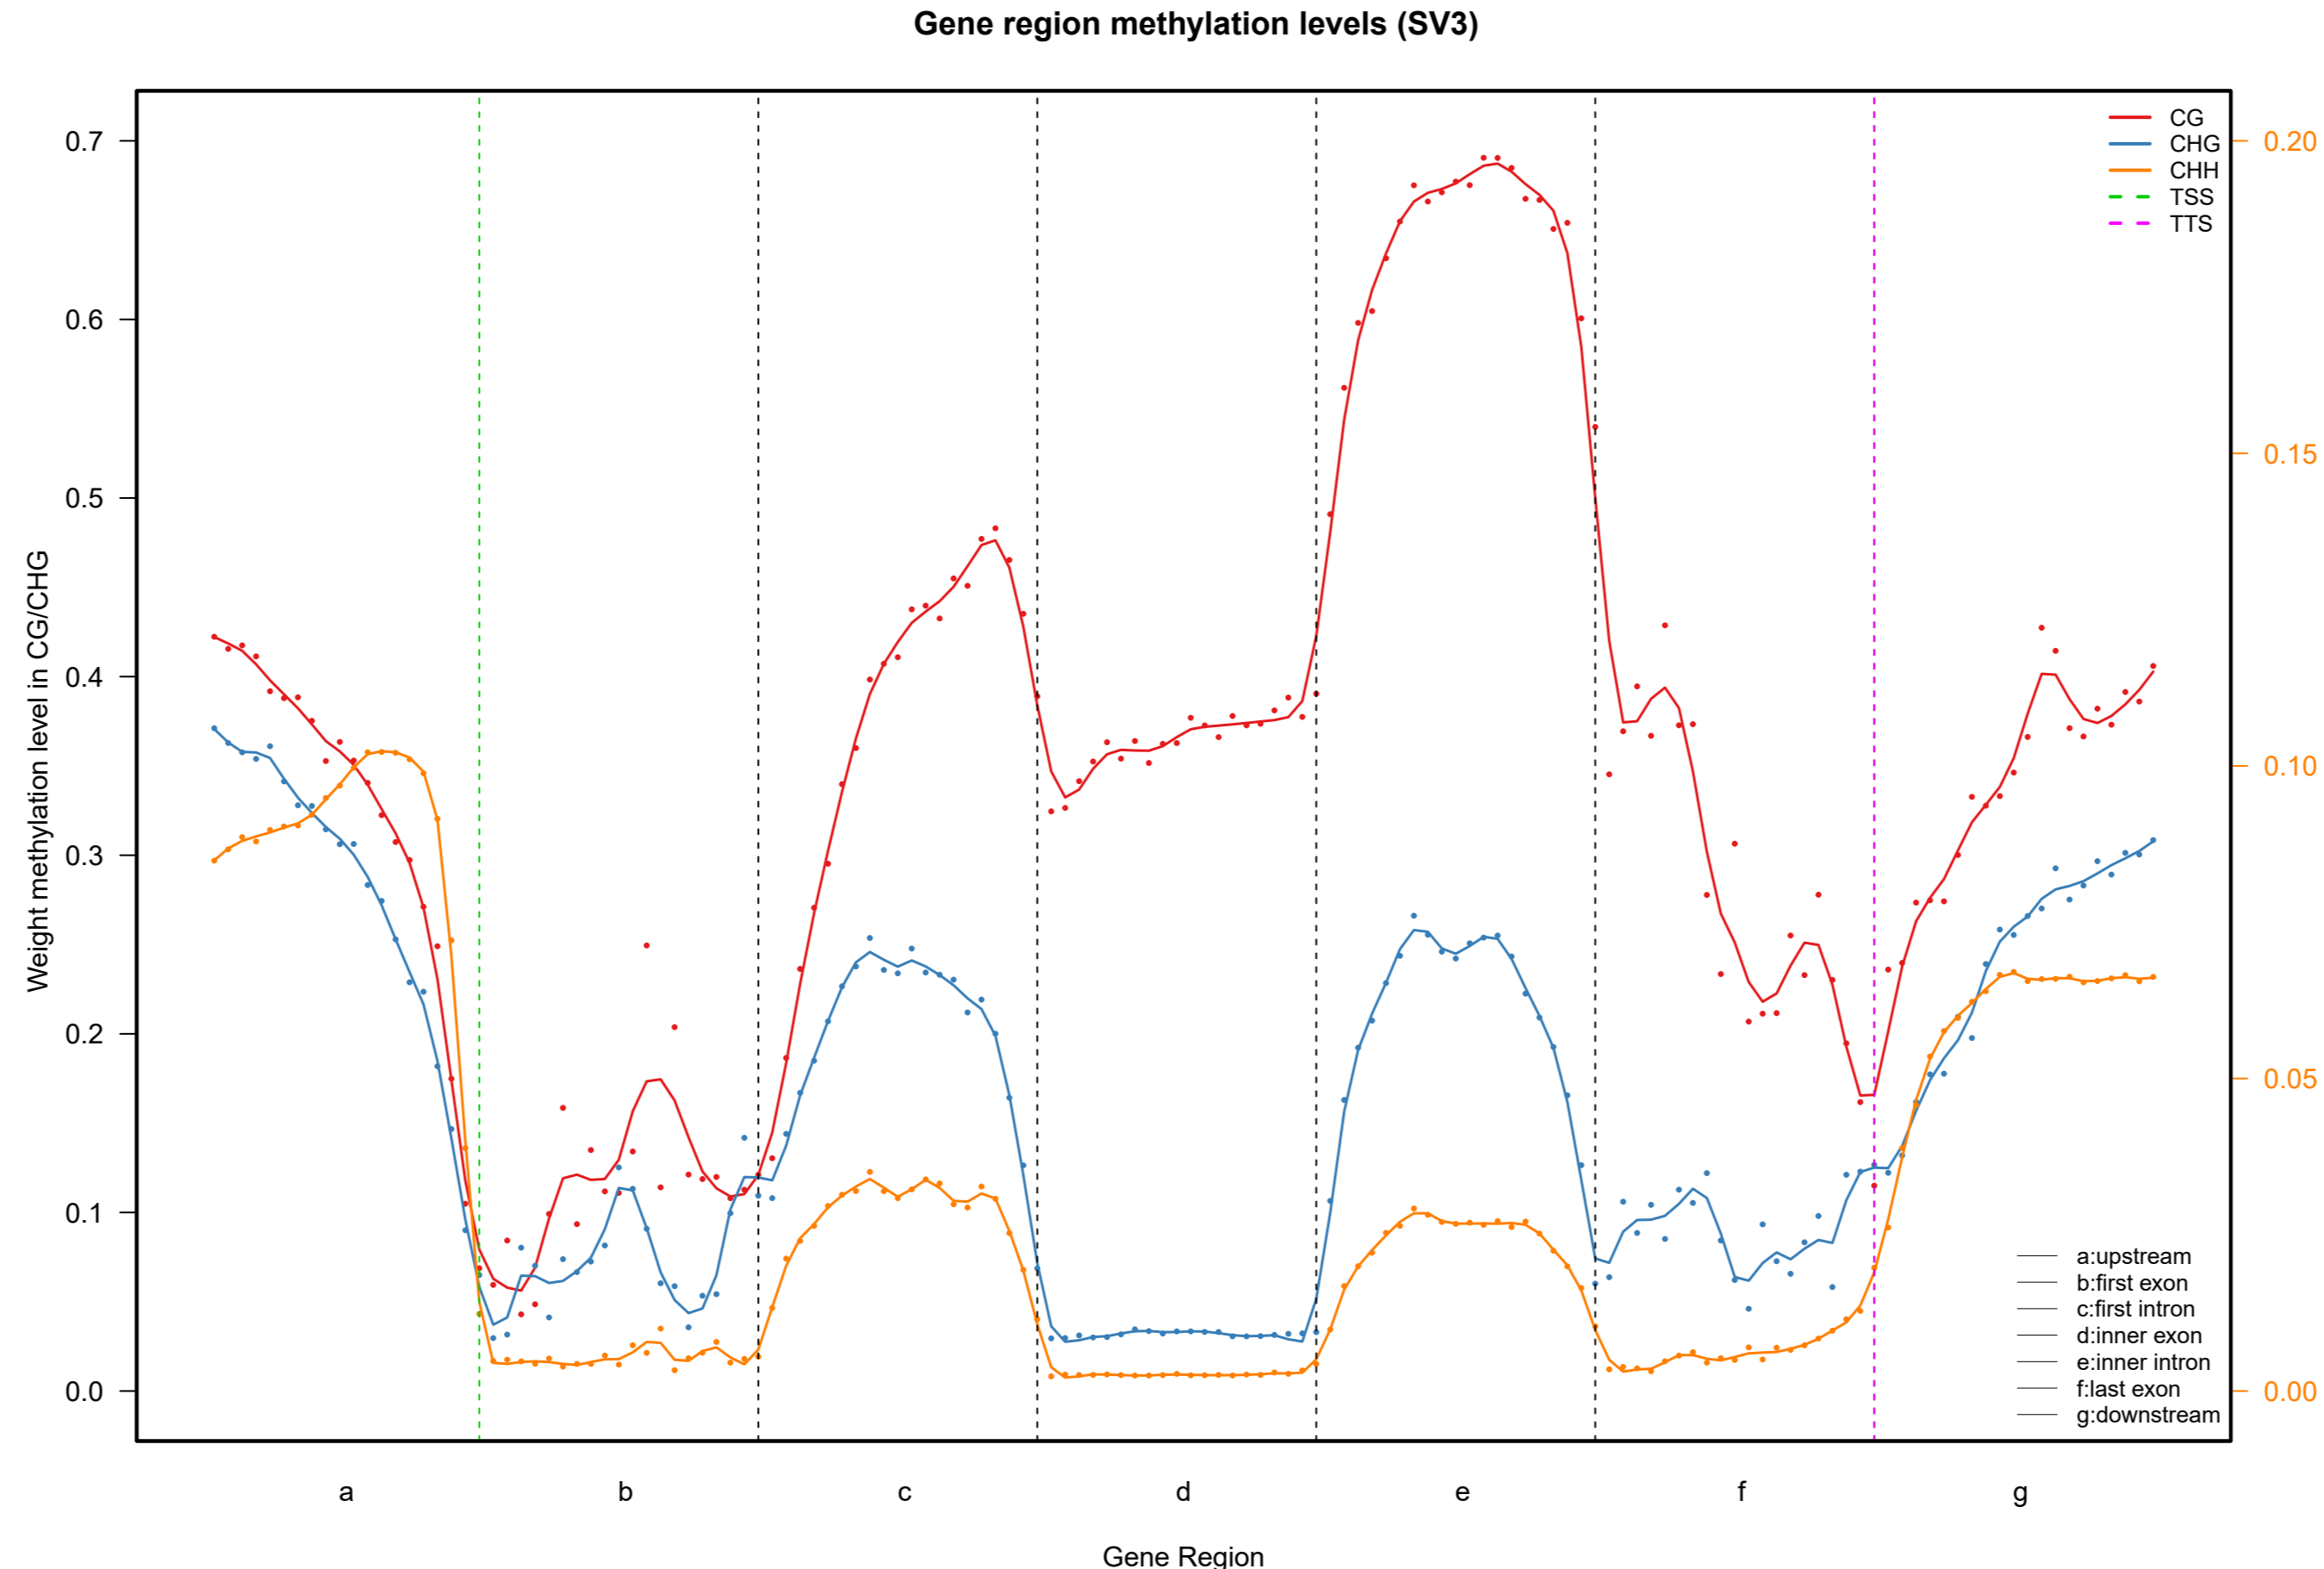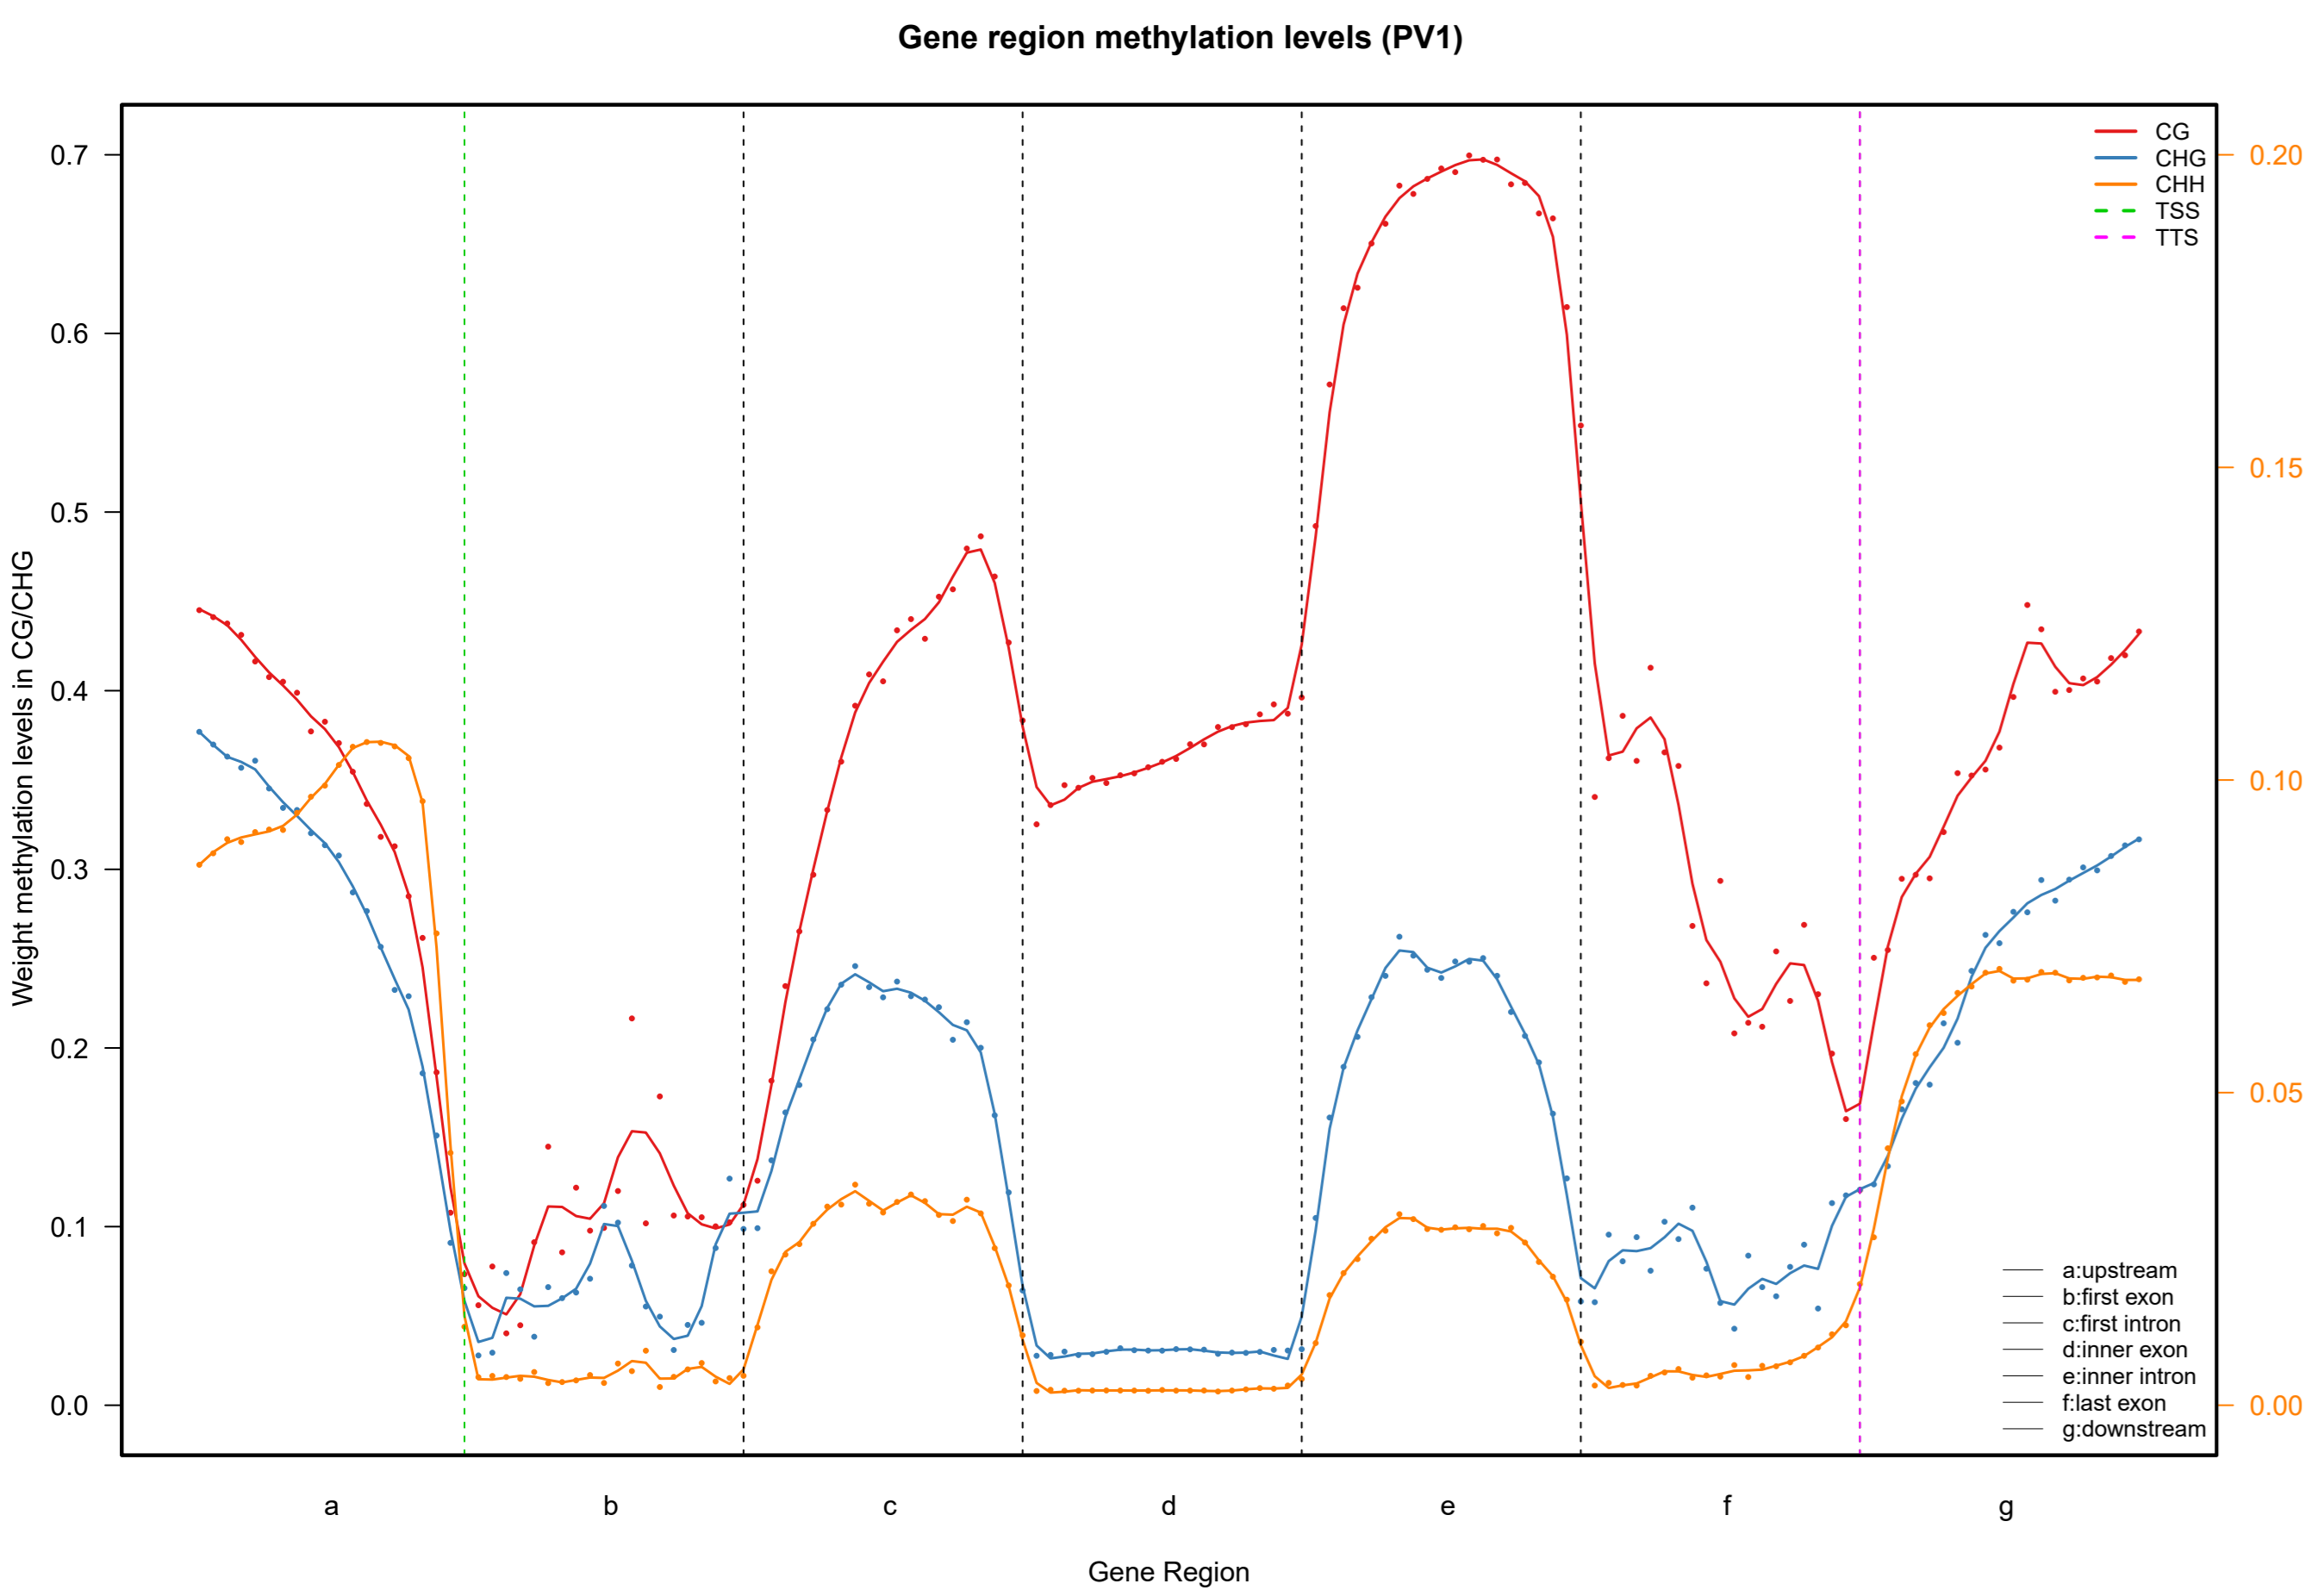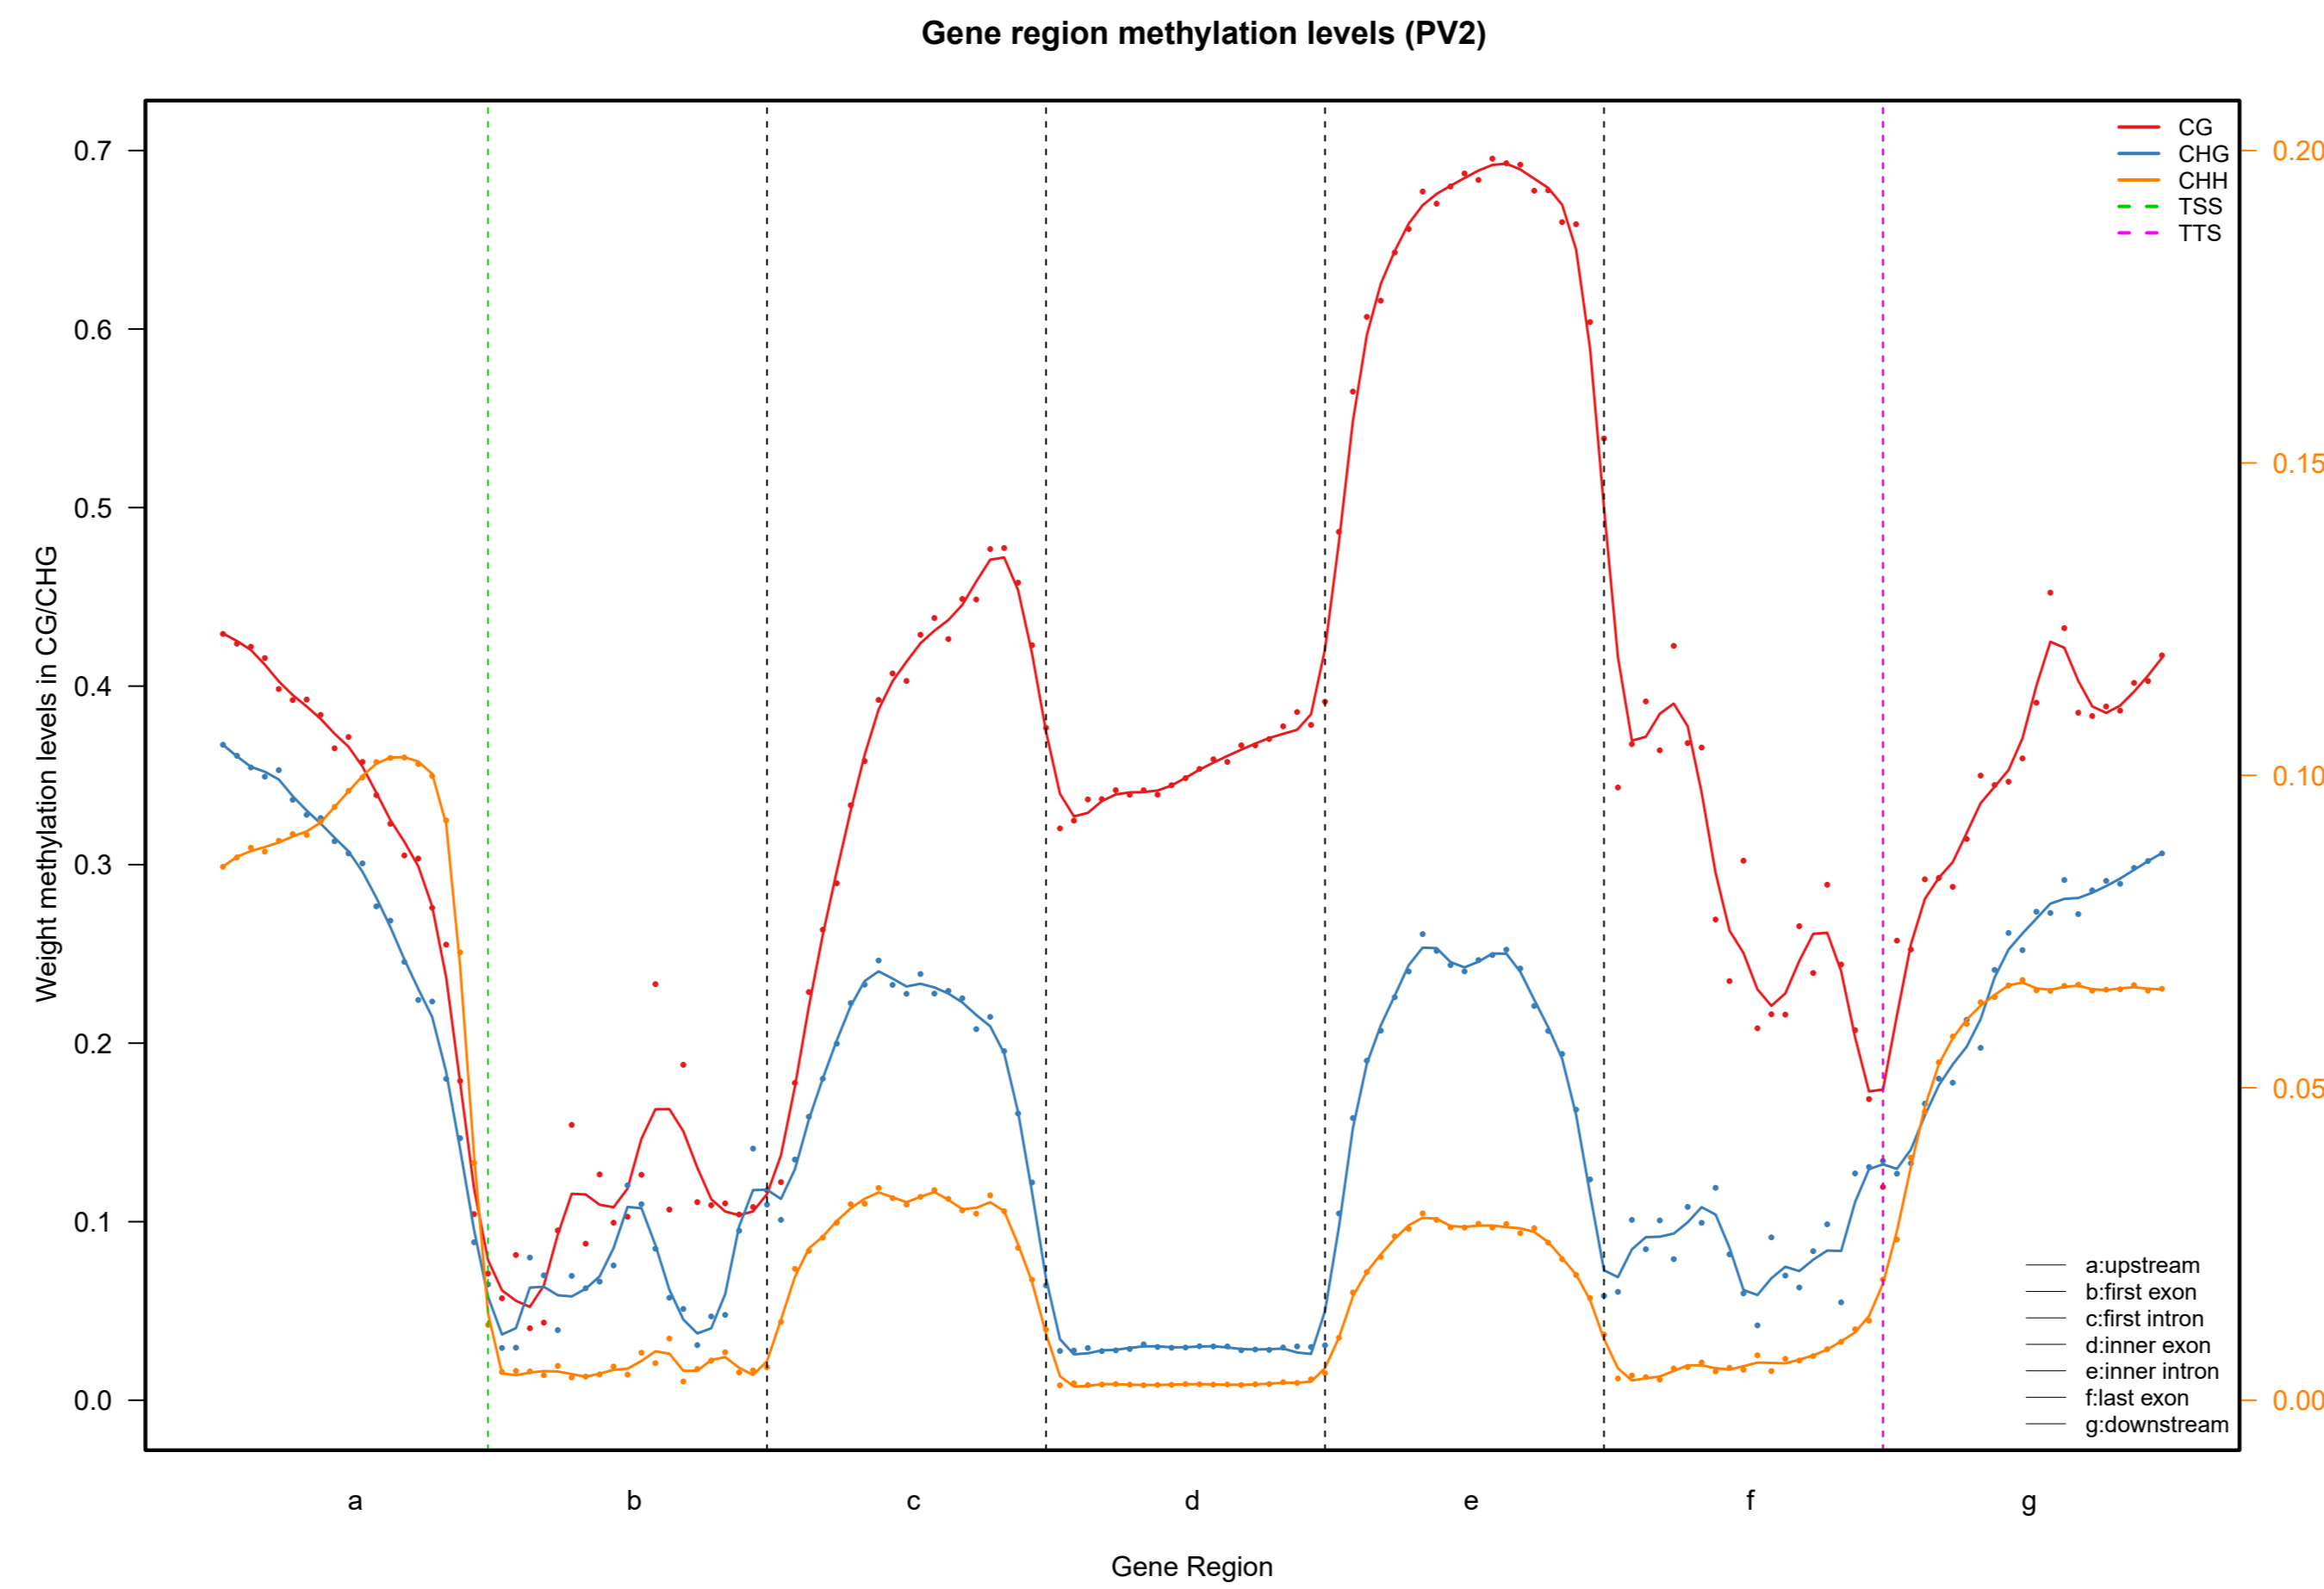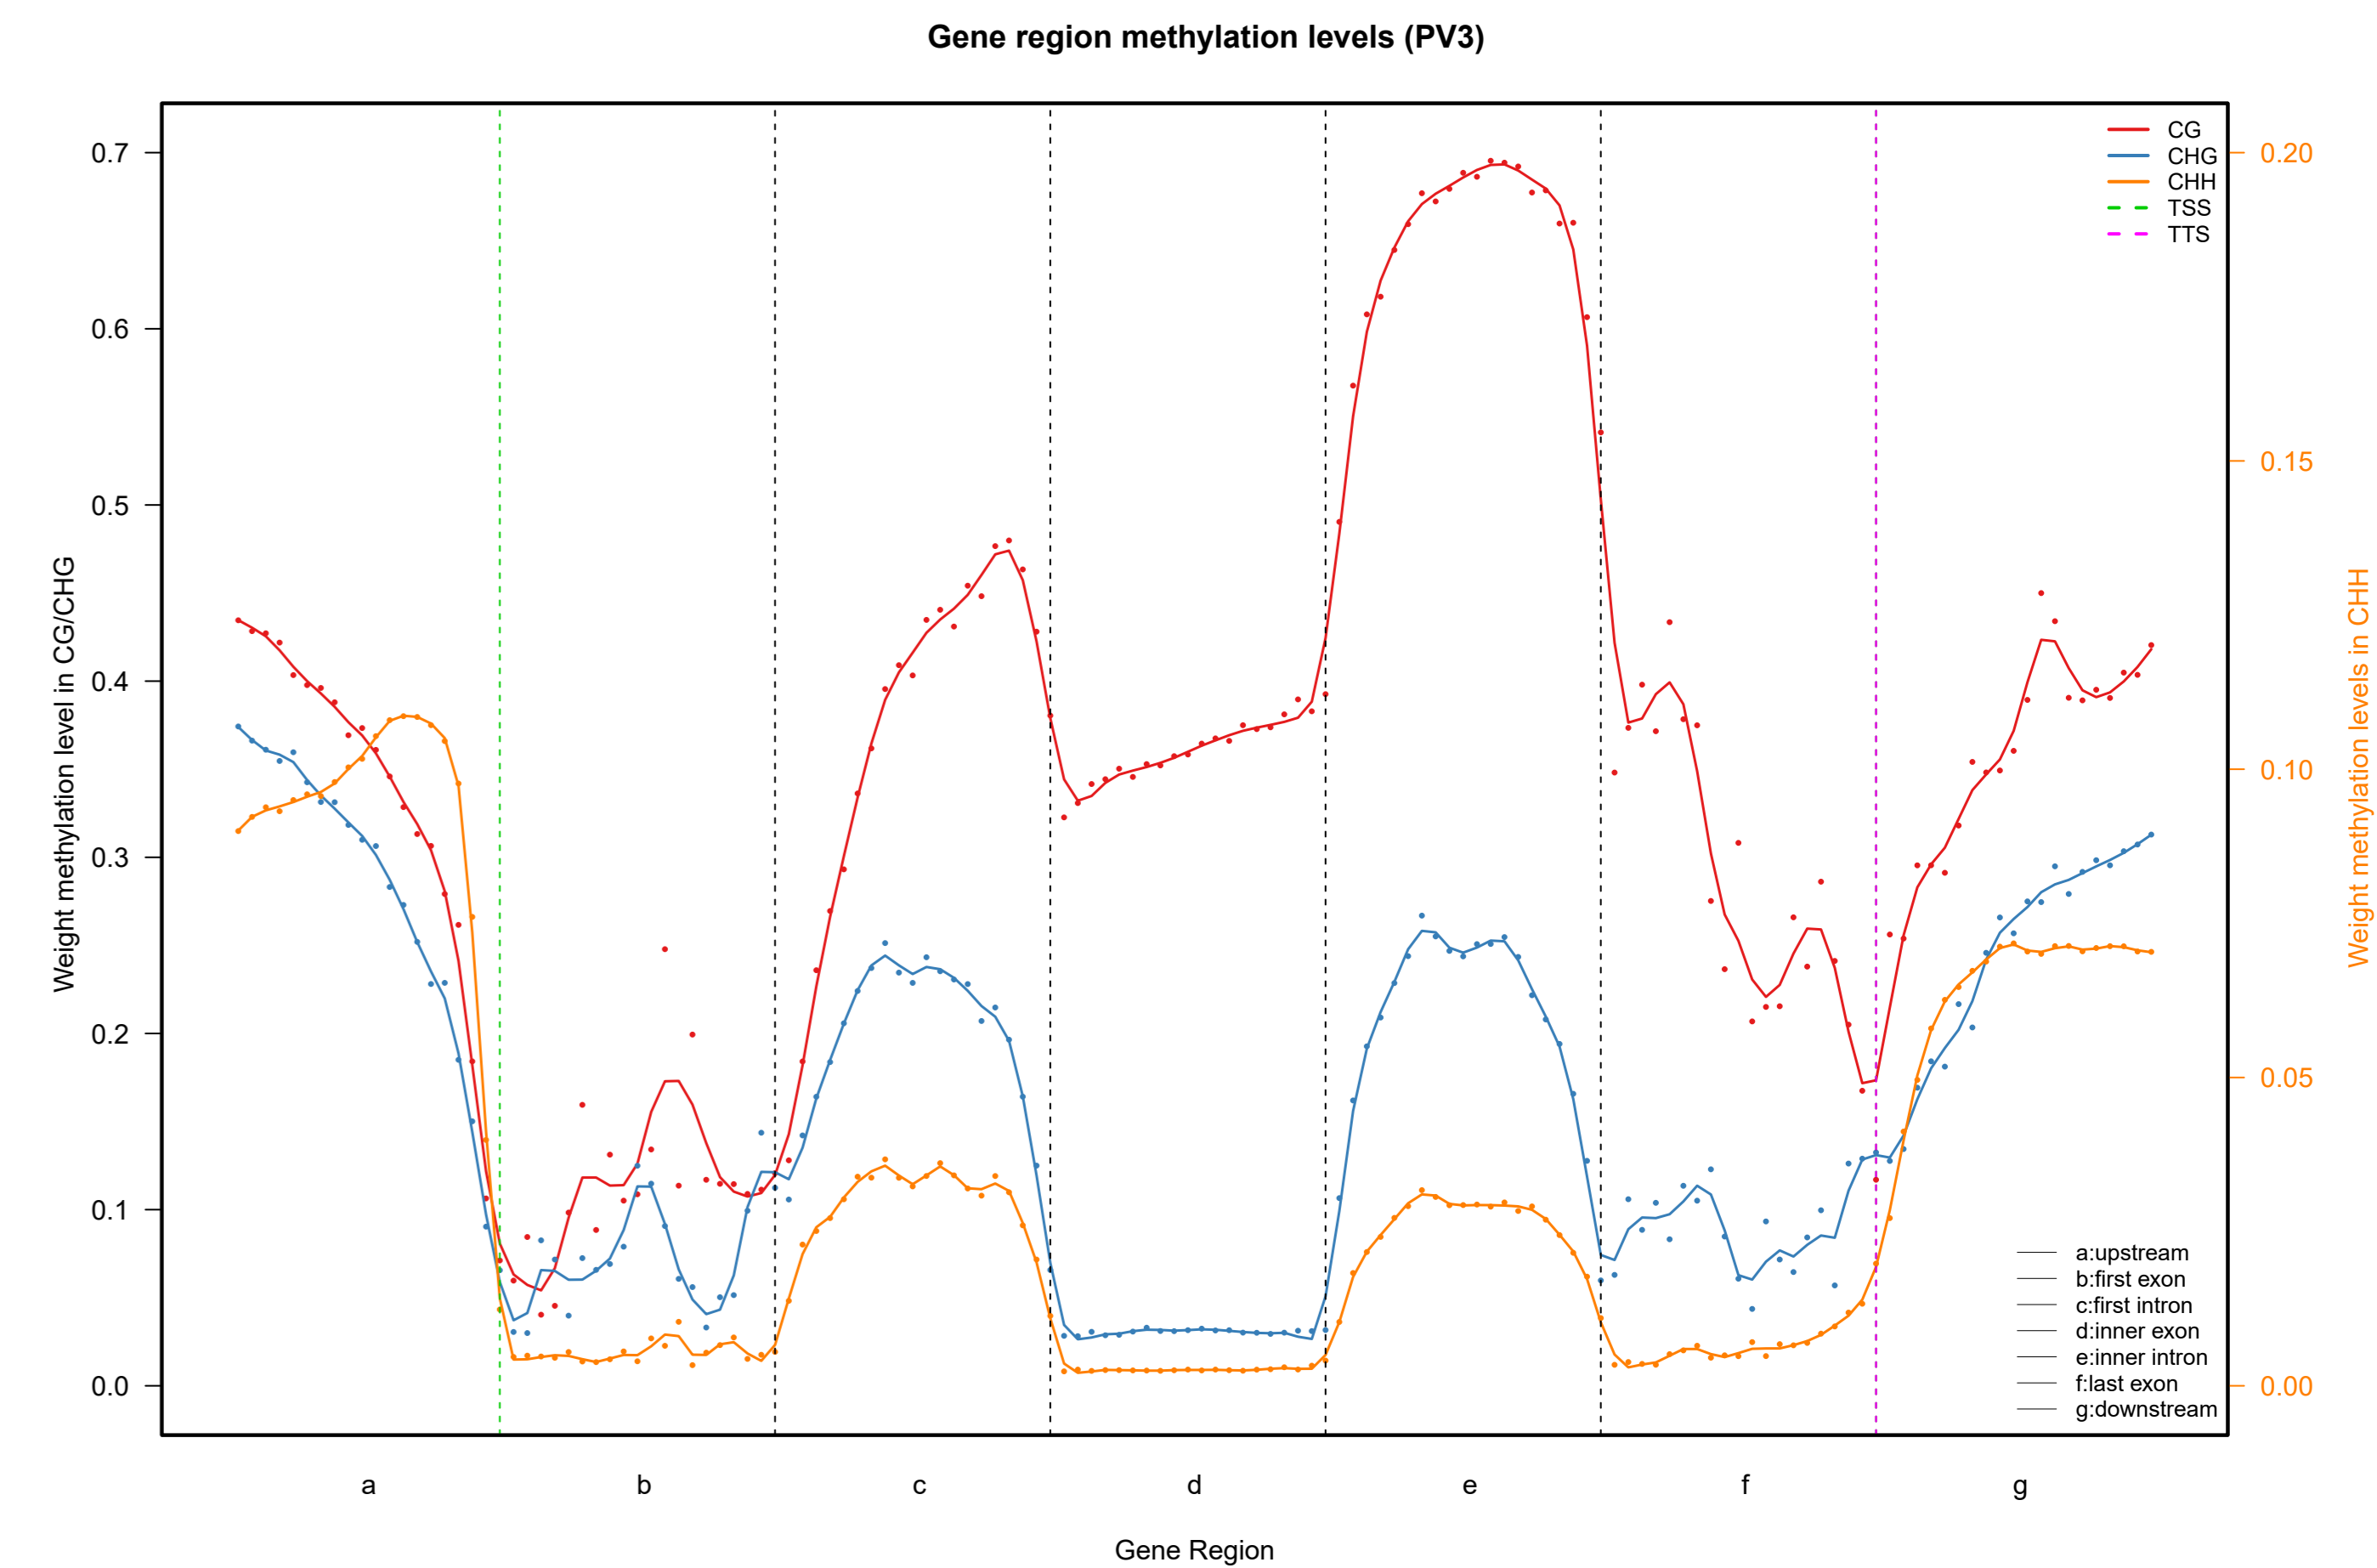

Supplement: s1 [file s1]

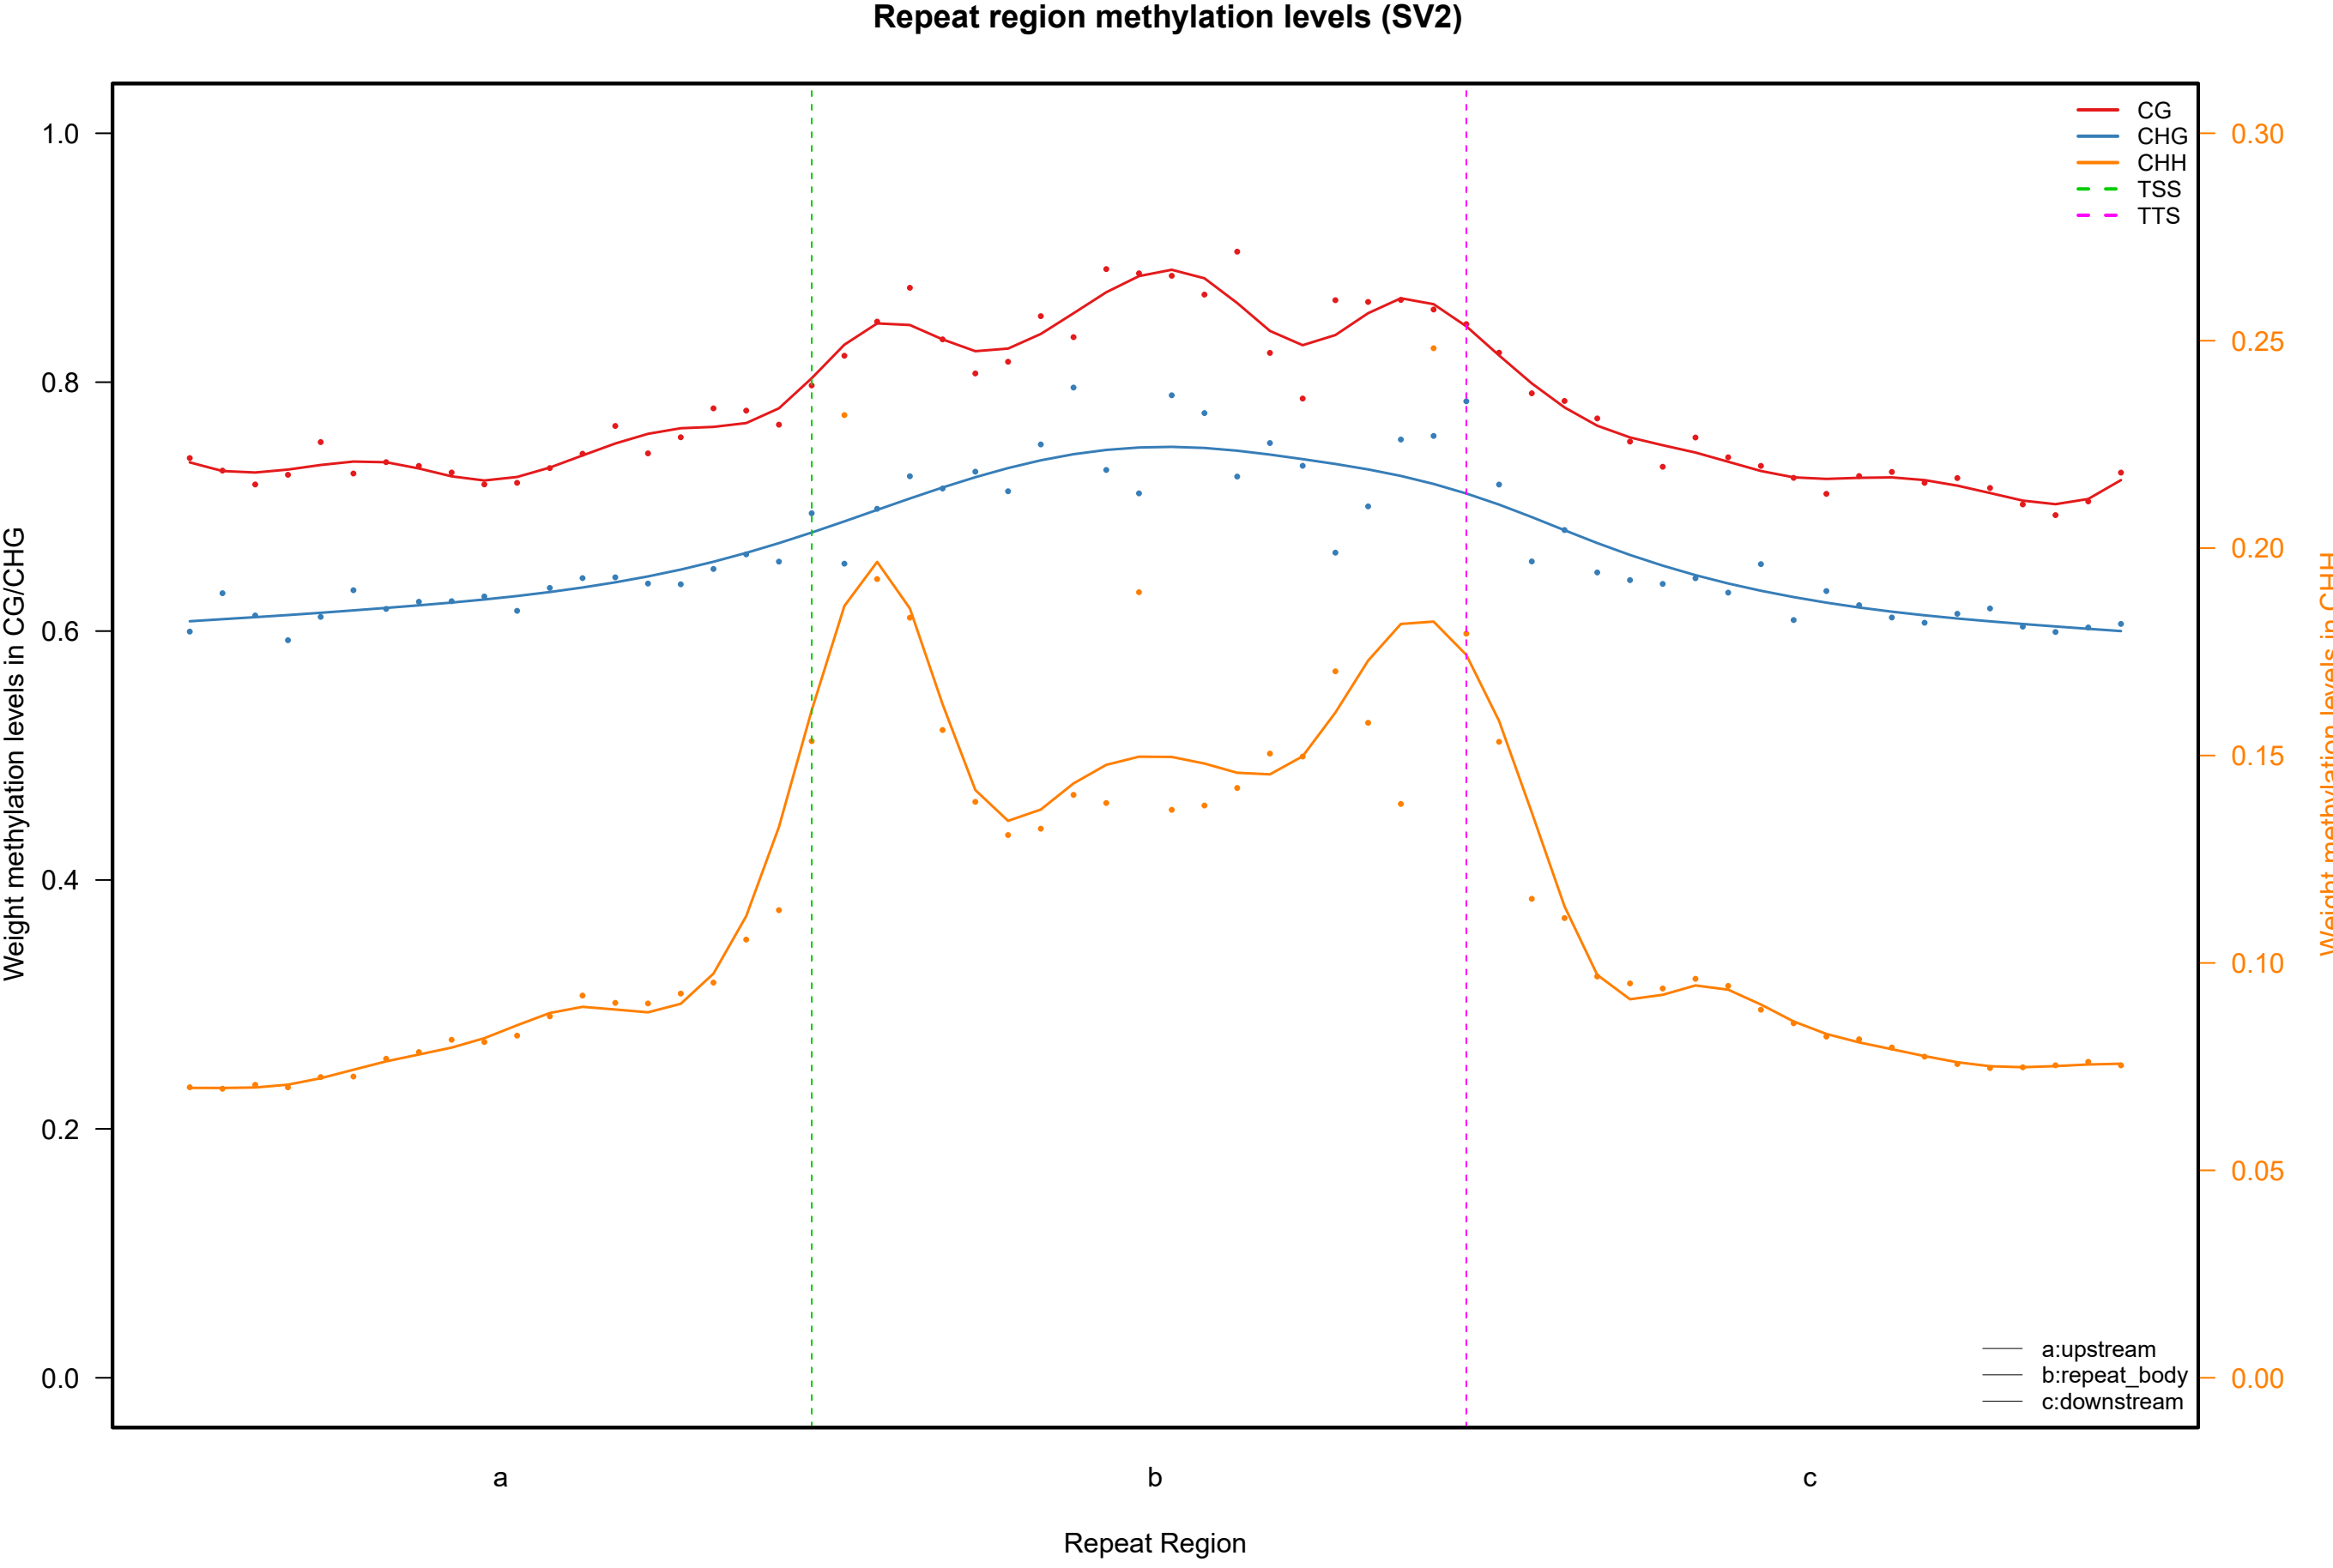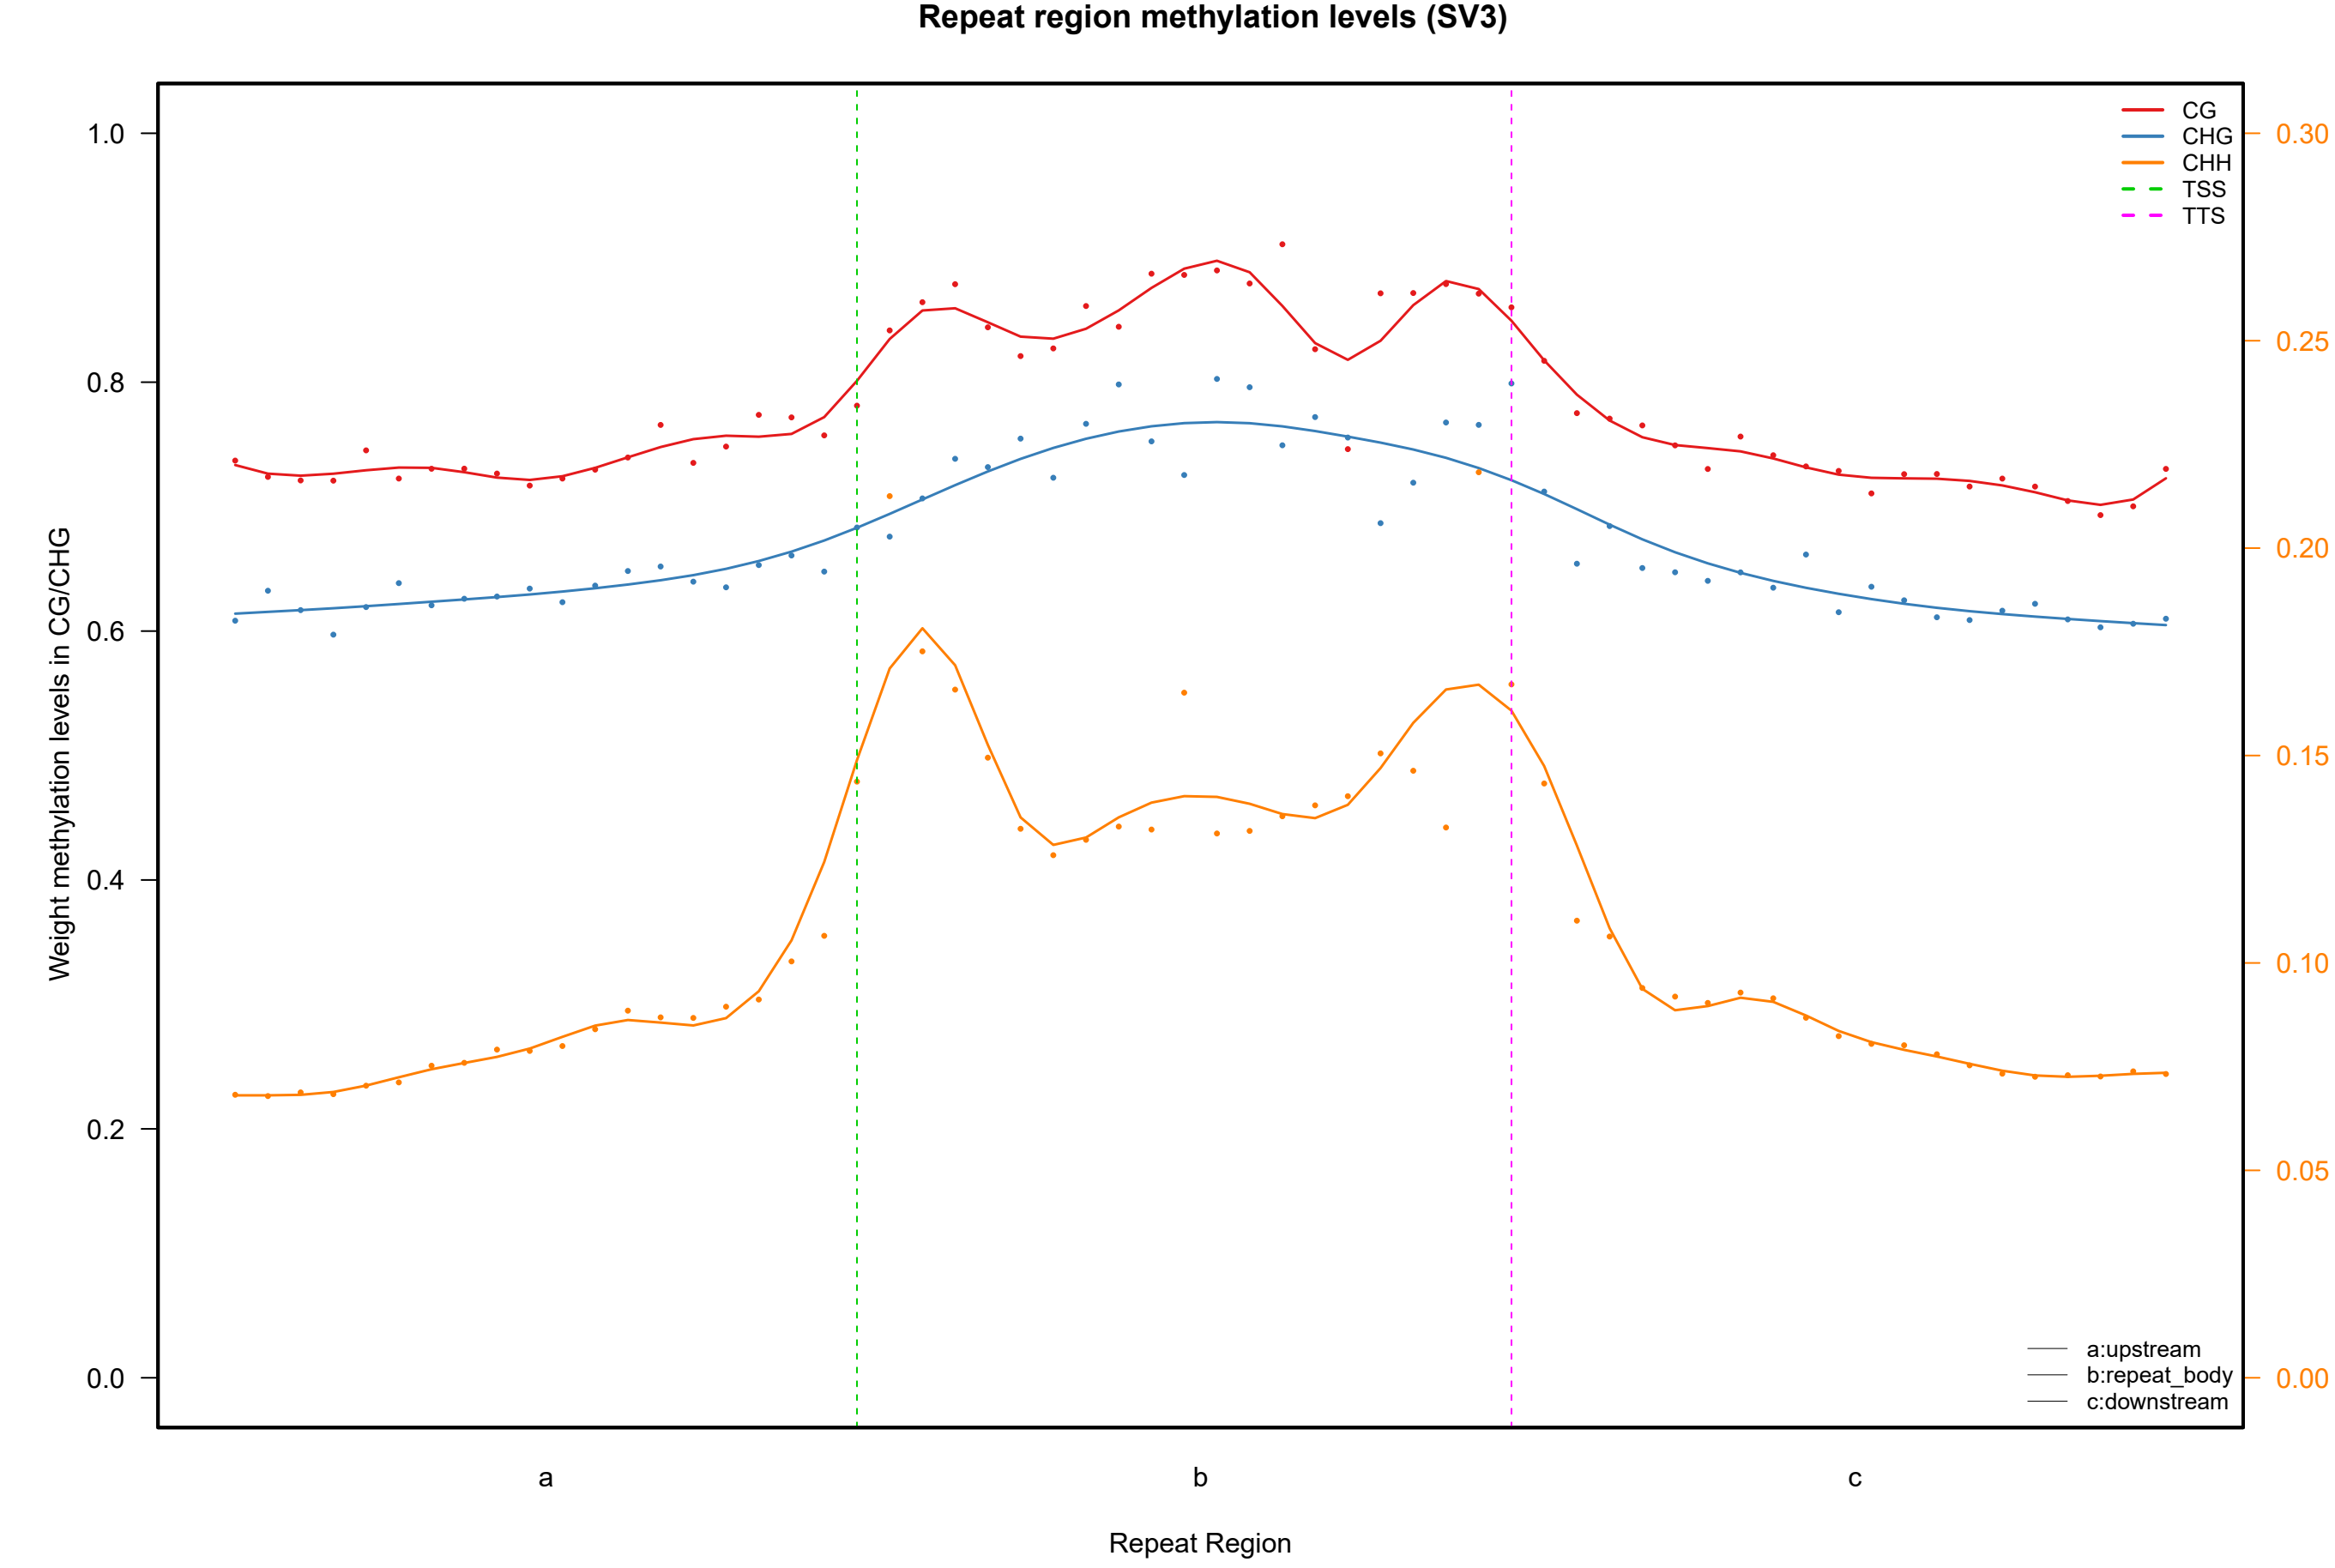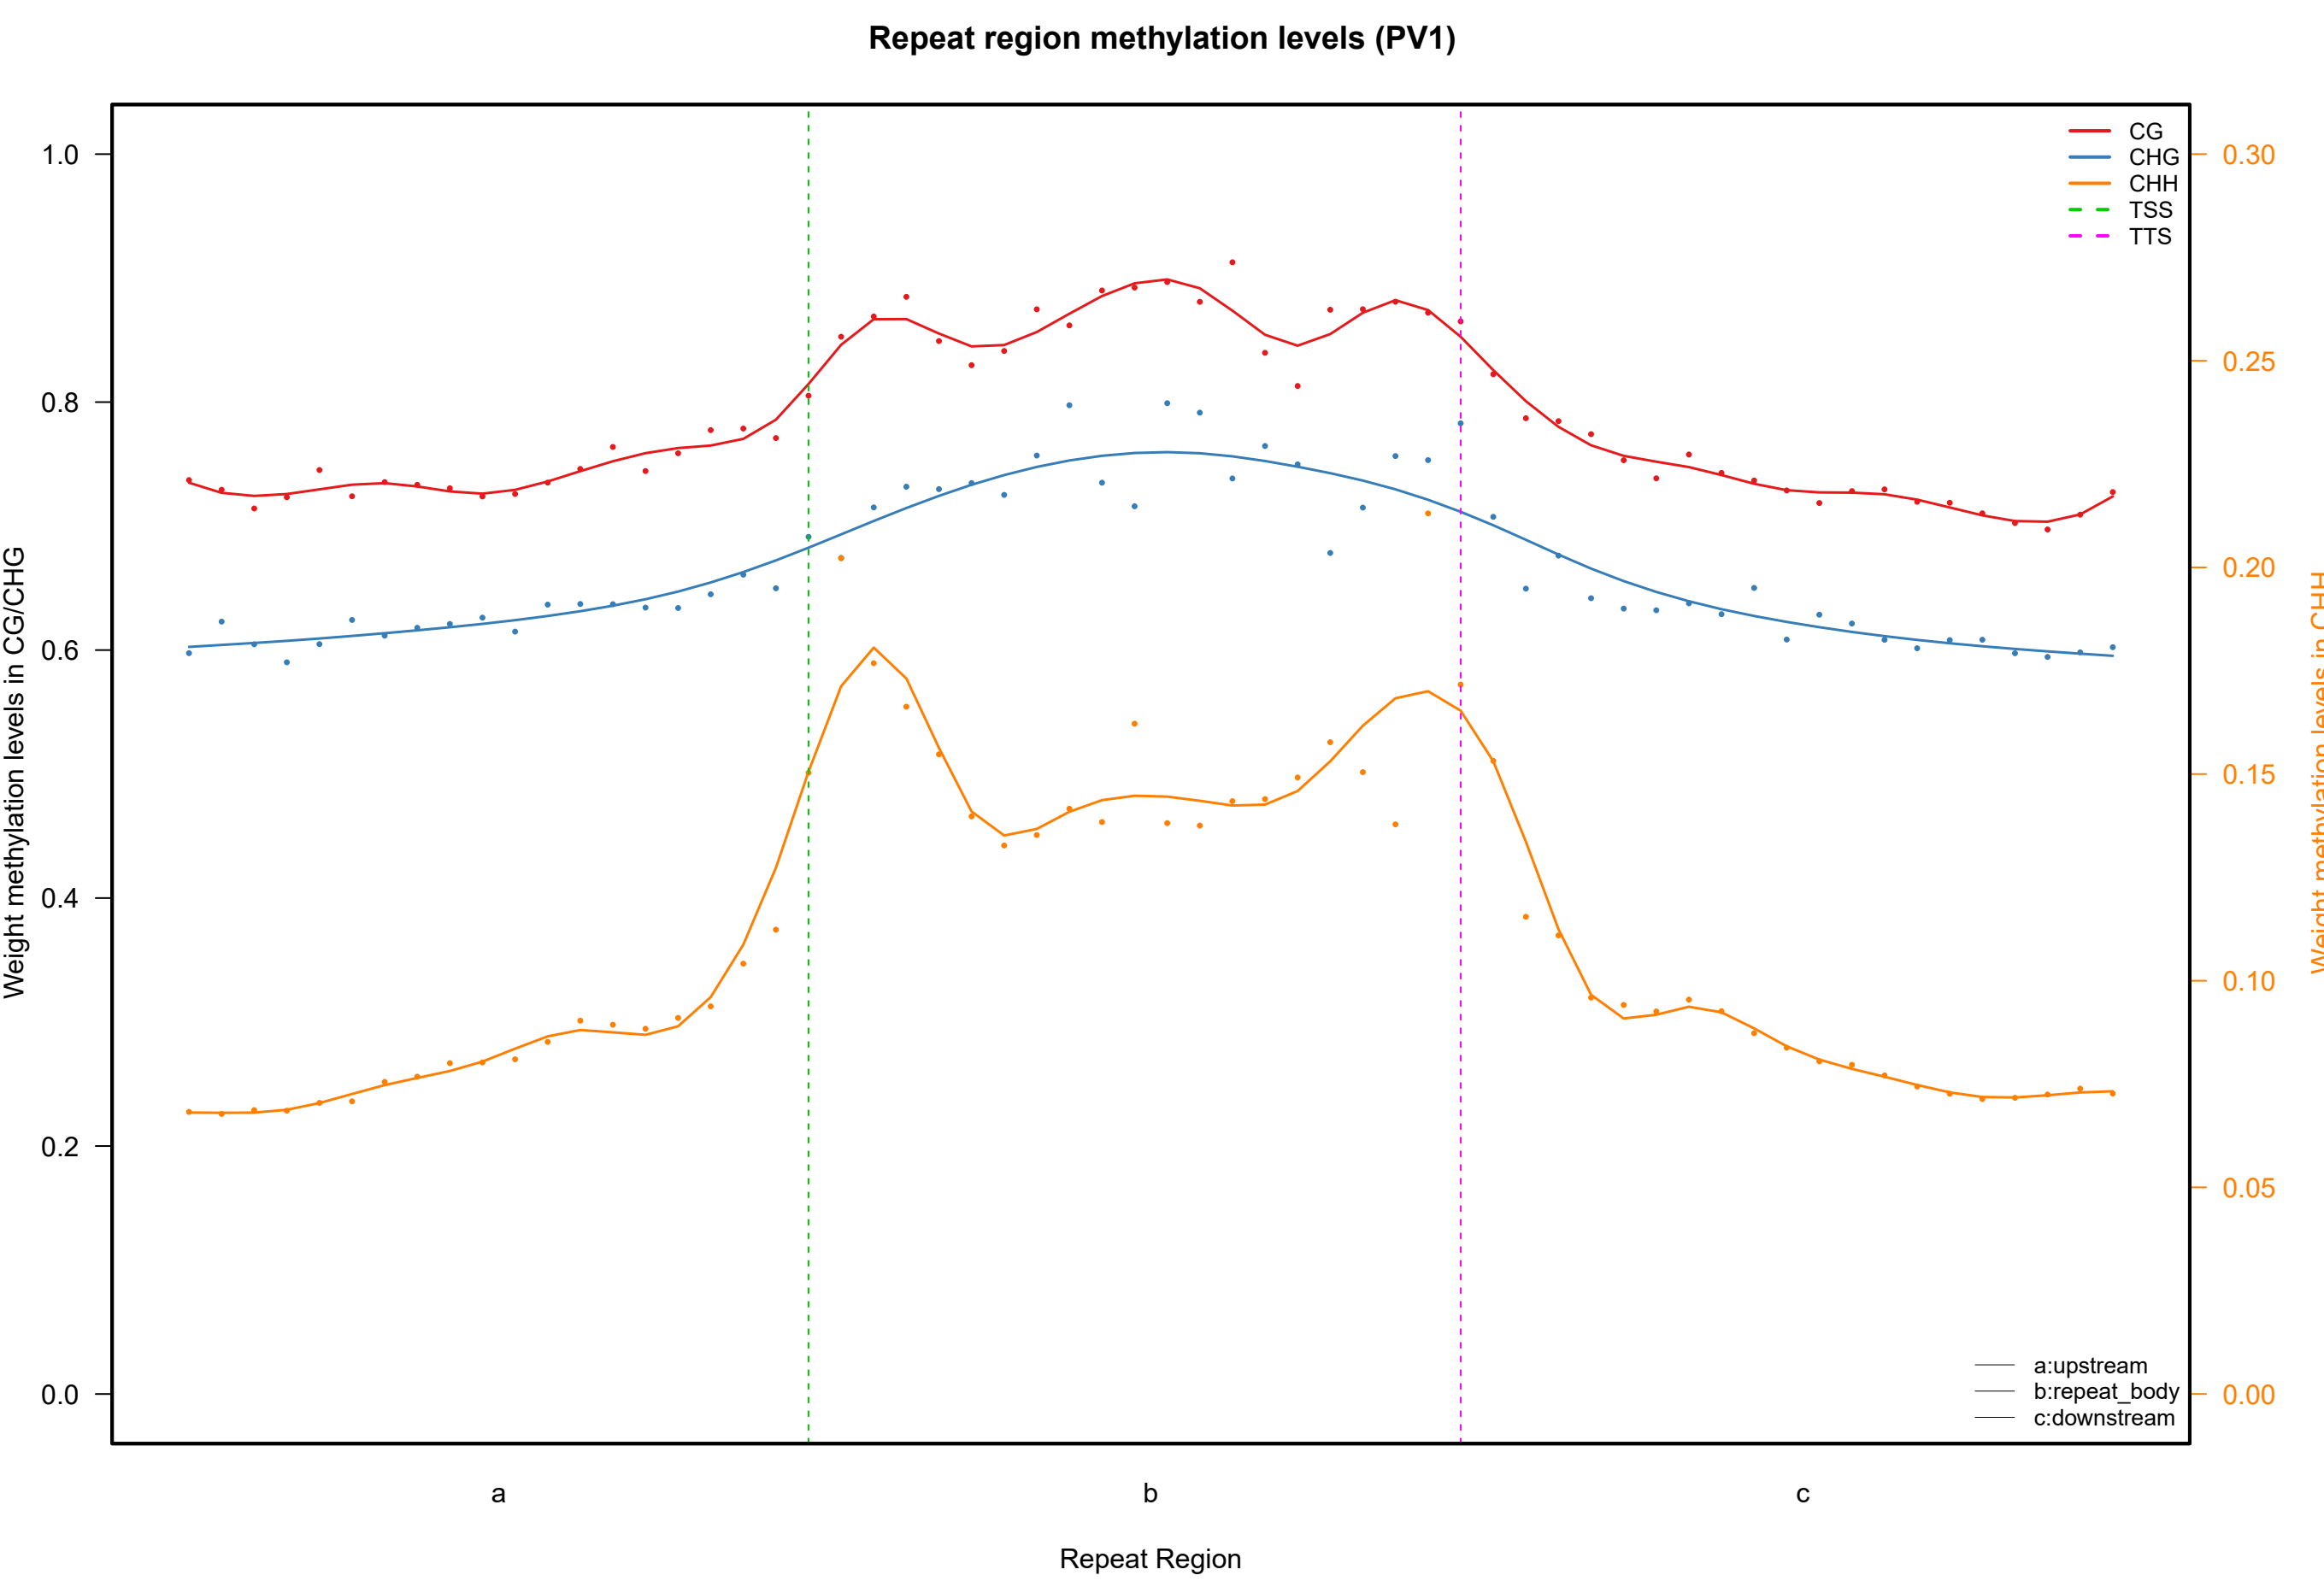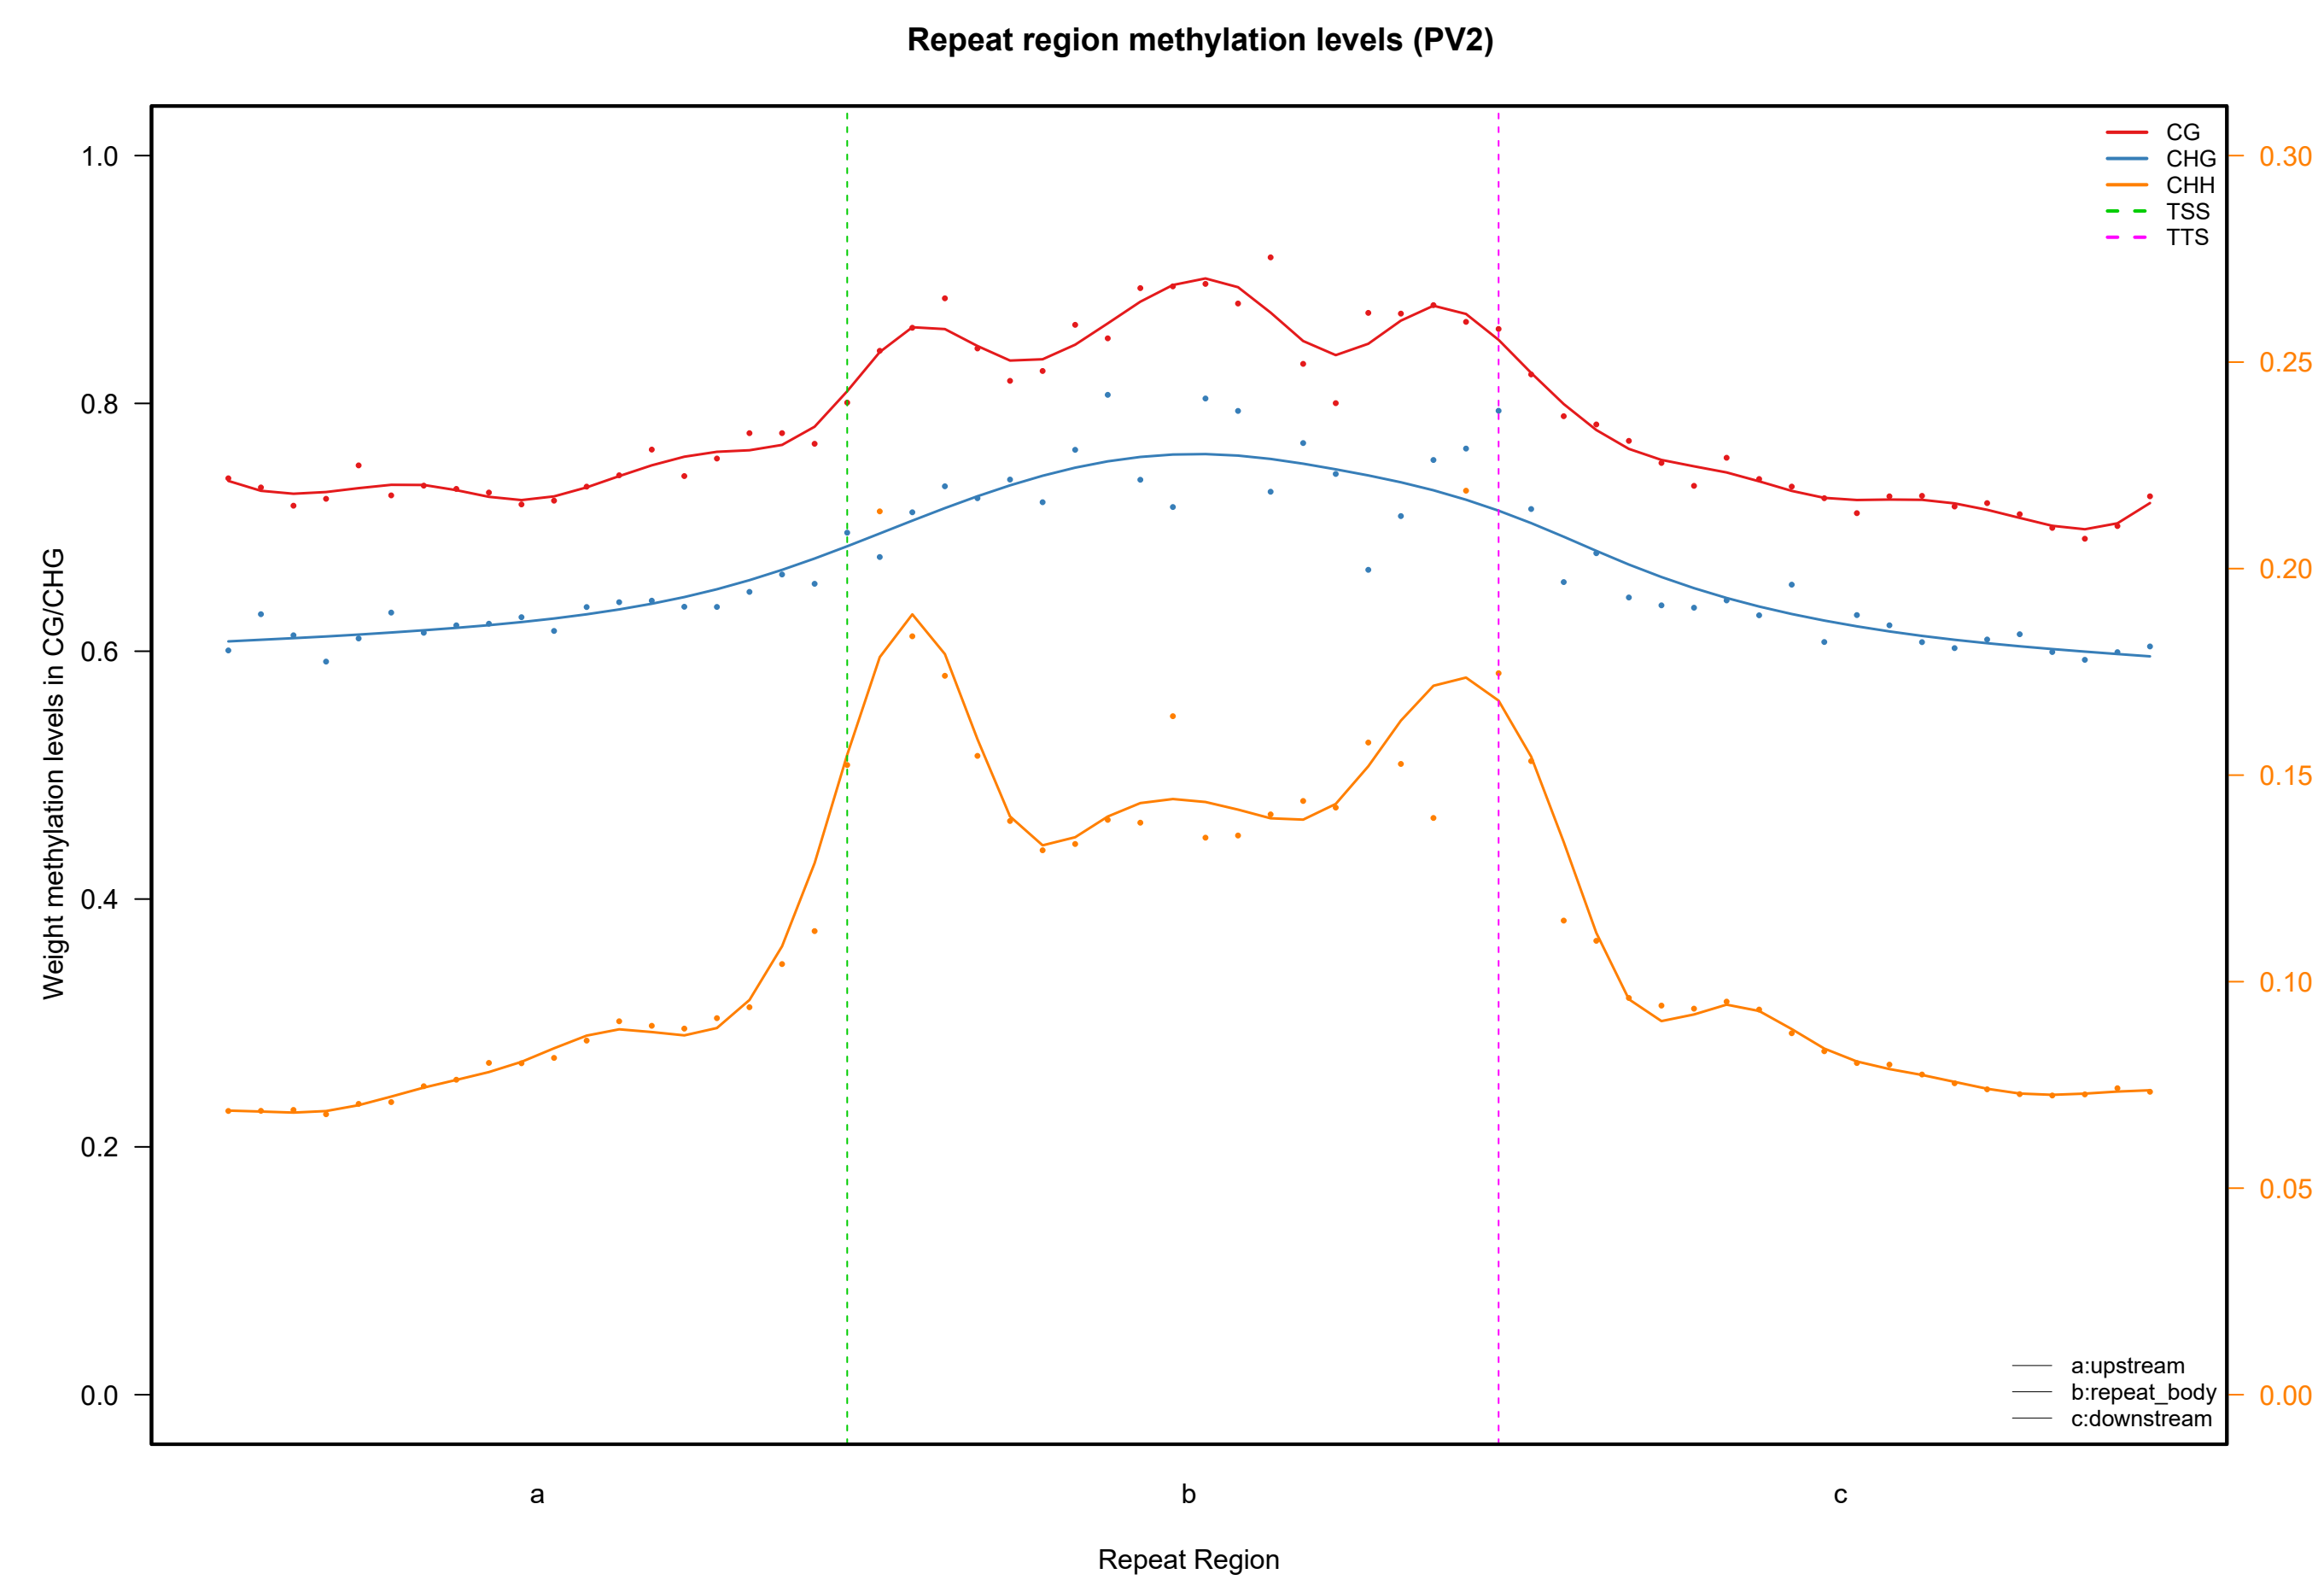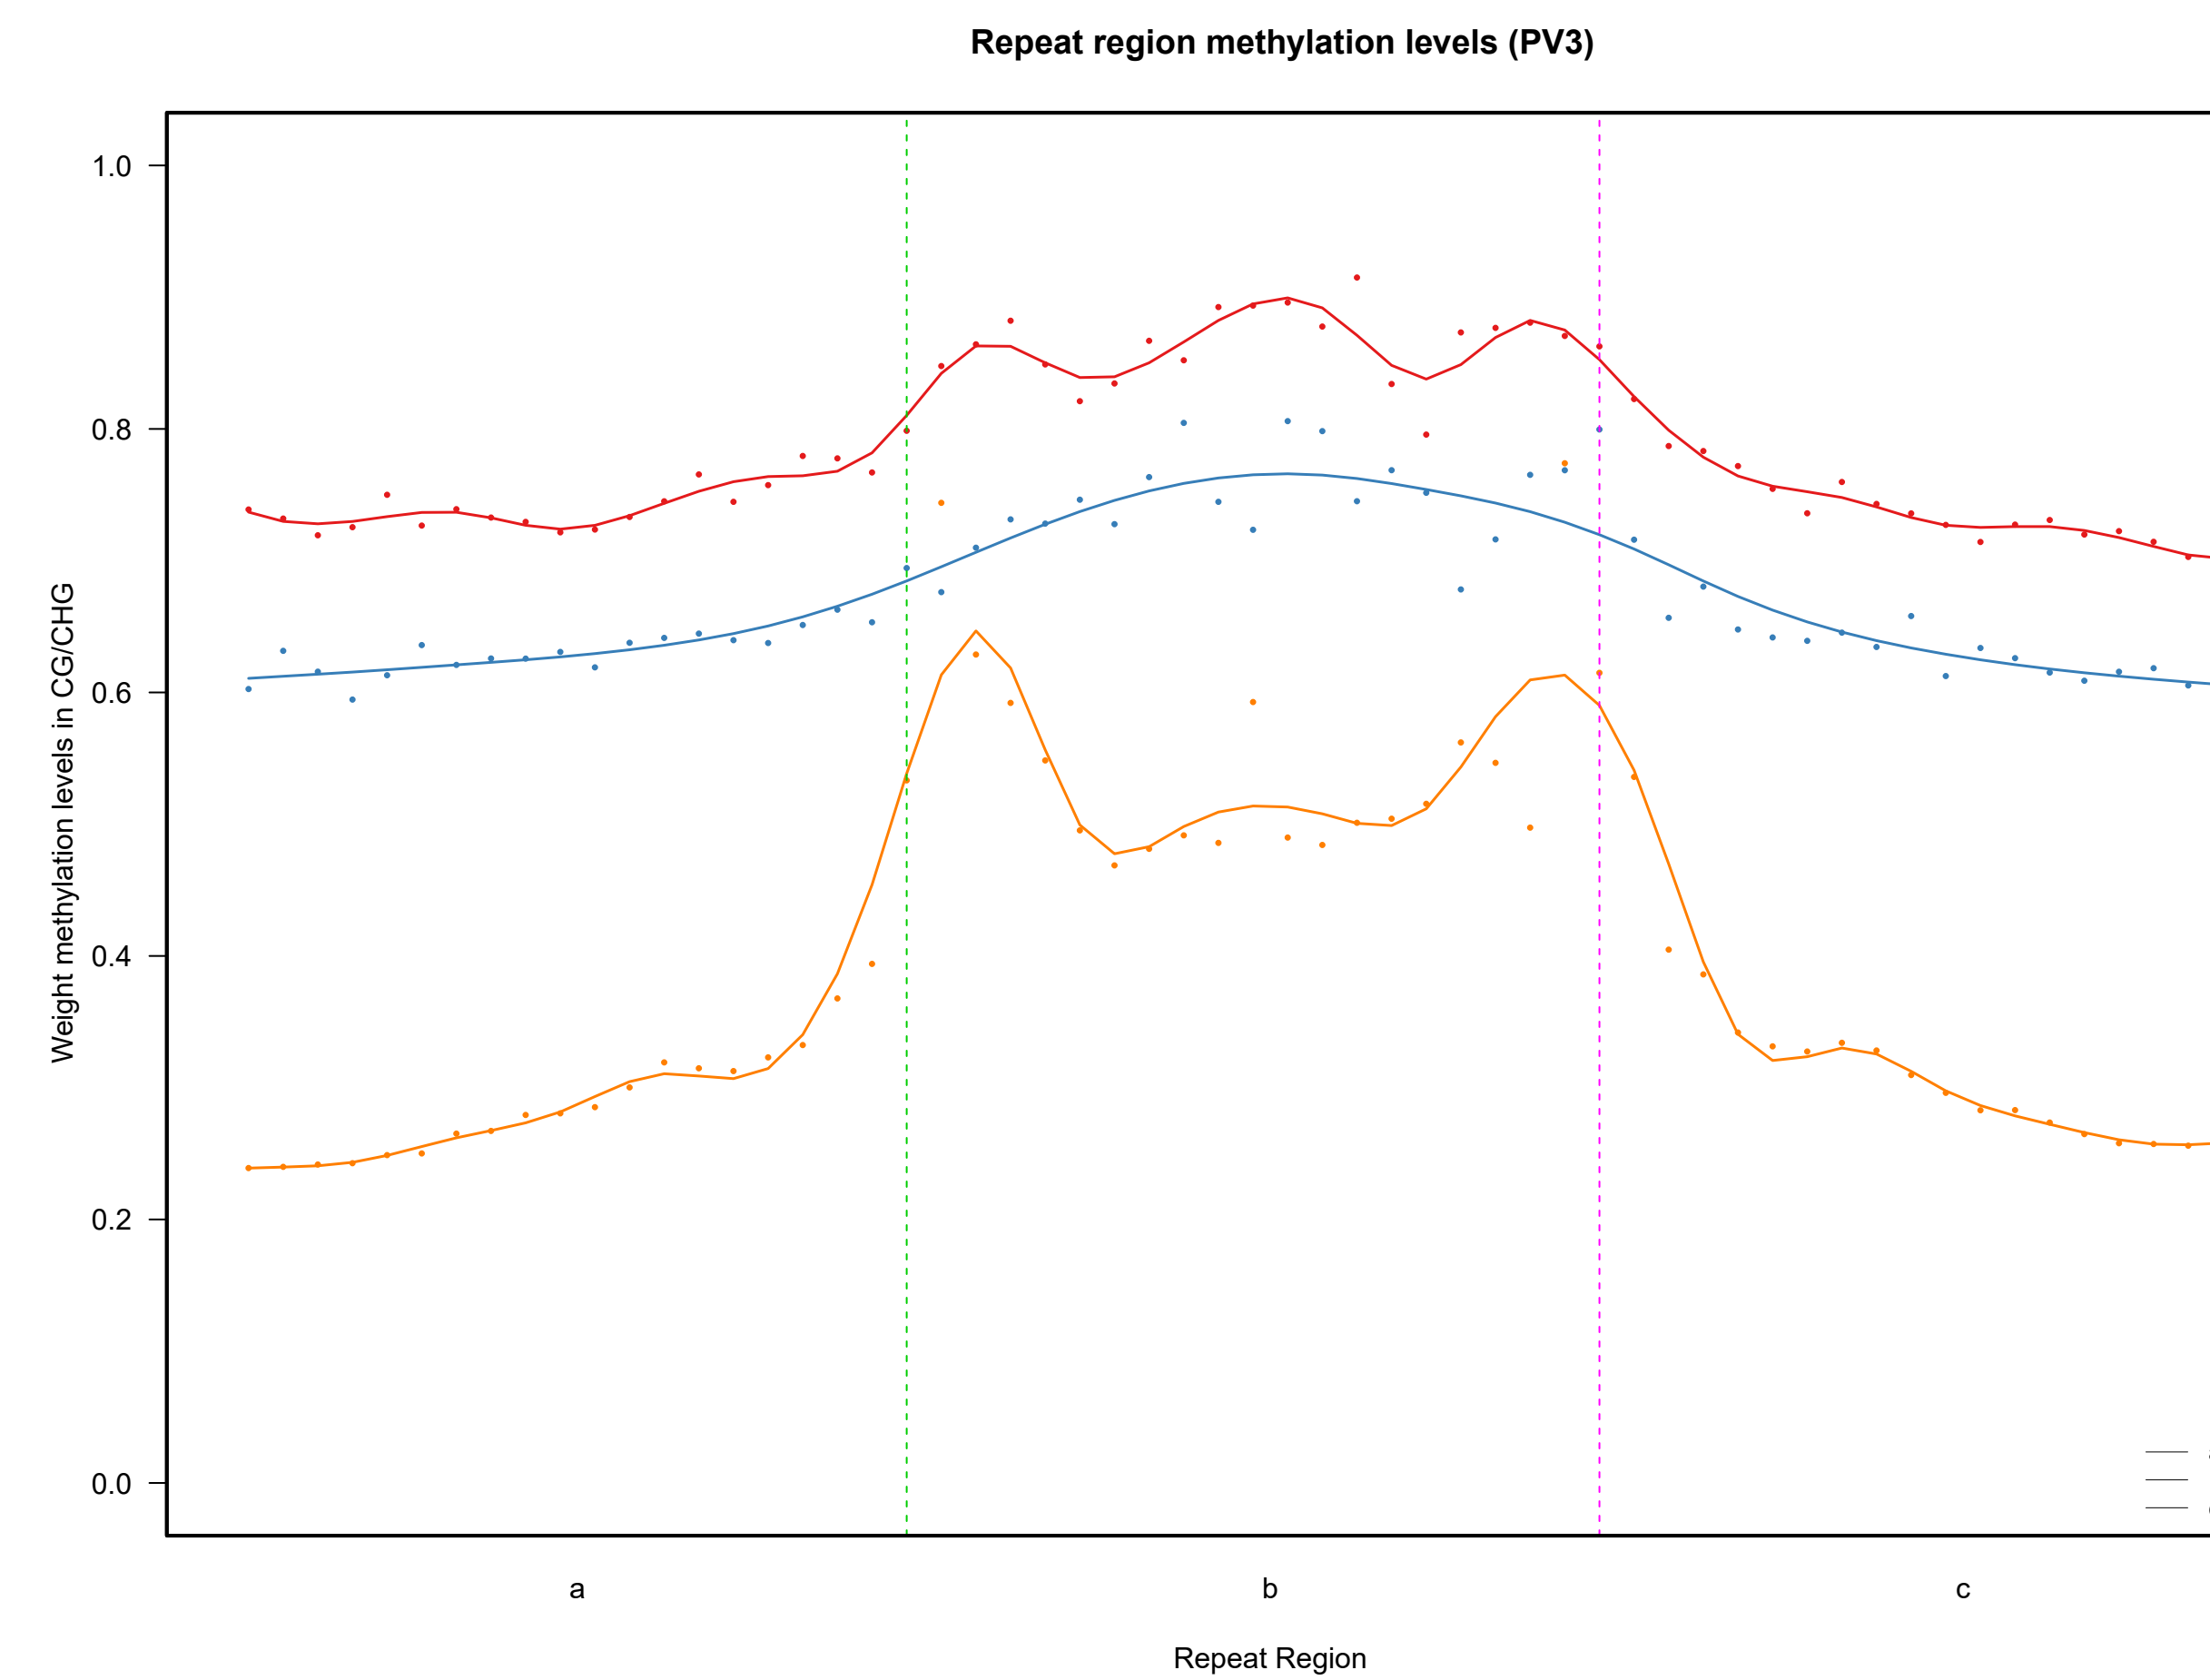

Supplement: s1 [file s1]
